# Supplementary material for: Understanding asymmetric hydrogenation of alkenes catalyzed by the first-row transition metal Fe: a first-principles exploration
Source: Royal Society of Chemistry journal article supplement (doi:10.1039/d4cp03583f), 2024-12-03
Supplement: d4cp03583f1.pdf [file d4cp03583f1.pdf]

## Supporting information for:

### Understanding asymmetric hydrogenation of alkenes catalyzed by first-row transition metal, Fe: a first-principles exploration

Akhilesh Mahato,<sup>a</sup> Anupama Mahato,<sup>a</sup> Sourav Ghoshal,<sup>b</sup> Anup Pramanik,<sup>a,\*</sup> Pranab Sarkar<sup>b,\*</sup>

<sup>a</sup>Department of Chemistry, Sidho-Kanho-Birsha University, Purulia, West Bengal-723104, India.

E-mail: [anup.pramanik@skbu.ac.in](mailto:anup.pramanik@skbu.ac.in)

<sup>b</sup>Department of Chemistry, Visva-Bharati University, Santiniketan, West Bengal-731235, India.

E-mail: [pranab.sarkar@visva-bharati.ac.in](mailto:pranab.sarkar@visva-bharati.ac.in)

Table S1: Calculated relative energy positions of different intermediate and transition states following 1-2 mode of catalytic hydrogenation of alkene at different levels of theories.

| Relative energies within different level of theories →<br>Species ↓ | M06L/<br>6-311G**<br>(kcal/mol)<br>Gas phase | M06L/<br>Def2-svp<br>(kcal/mol)<br>Gas phase | M06L/<br>Def2-tzvp<br>(kcal/mol)<br>Gas phase | B3LYP/<br>6-311G**<br>(kcal/mol)<br>Gas phase | B3LYP(GD3)/<br>6-311G**<br>(kcal/mol)<br>Gas phase | M06L/<br>6-311+G**<br>(kcal/mol)<br>Gas phase | M06L/<br>6-311G**<br>(kcal/mol)<br>in Acetonitrile<br>solvent |
|---------------------------------------------------------------------|----------------------------------------------|----------------------------------------------|-----------------------------------------------|-----------------------------------------------|----------------------------------------------------|-----------------------------------------------|---------------------------------------------------------------|
| <b>I<sub>0</sub></b>                                                | 0                                            | 0                                            | 0                                             | 0                                             | 0                                                  | 0                                             | 0                                                             |
| <b>I</b>                                                            | -2.02                                        | 0.62                                         | 0.93                                          | 36.02                                         | 15.57                                              | -1.01                                         | 6.63                                                          |
| <b>TS<sub>1</sub></b>                                               | 2.55                                         | 4.66                                         | 5.08                                          | 36.50                                         | 17.02                                              | 4.13                                          | 11.60                                                         |
| <b>II</b>                                                           | -13.90                                       | -11.64                                       | -9.15                                         | 2.90                                          | -13.47                                             | -14.40                                        | -8.32                                                         |
| <b>III</b>                                                          | -14.54                                       | -12.36                                       | -8.77                                         | 2.67                                          | -13.48                                             | -14.50                                        | -6.44                                                         |
| <b>TS<sub>2</sub></b>                                               | 0.78                                         | 5.46                                         | 8.93                                          | 44.60                                         | 14.76                                              | 4.38                                          | 15.14                                                         |
| <b>IV</b>                                                           | -20.11                                       | -17.53                                       | -14.03                                        | 10.50                                         | -3.87                                              | -22.46                                        | -11.44                                                        |
| <b>V</b>                                                            | -18.42                                       | -16.55                                       | -14.56                                        | -8.70                                         | -18.99                                             | -22.10                                        | -14.88                                                        |
| <b>TS<sub>3</sub></b>                                               | -10.34                                       | -8.93                                        | -6.84                                         | 6.30                                          | 4.99                                               | -10.06                                        | -4.12                                                         |
| <b>VI</b>                                                           | -18.17                                       | -16.68                                       | -16.28                                        | -13.70                                        | -19.83                                             | -20.92                                        | -17.47                                                        |

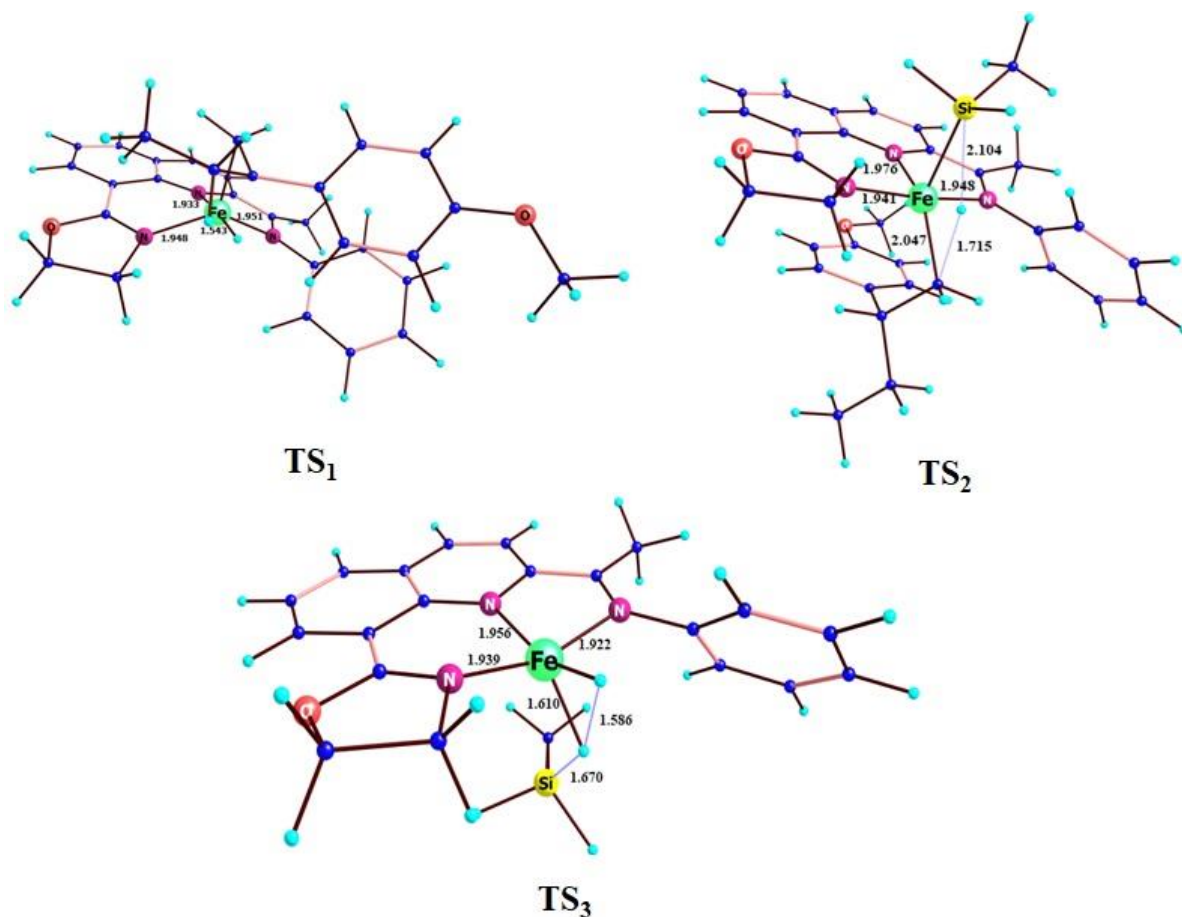

Figure S1: Optimized geometries of the transition state structures for the 1-2 mode of catalytic hydrogenation of alkene.

Table S2: Calculated relative energy positions of different intermediate and transition states following 2-1 mode of catalytic hydrogenation of alkene at different levels of theories.

| Relative energies within different level of theories → Species ↓ | M06L/6-311G** (kcal/mol) Gas phase | M06L/Def2-svp (kcal/mol) Gas phase | M06L/Def2-tzvp (kcal/mol) Gas phase | B3LYP/6-311G** (kcal/mol) Gas phase | B3LYP(GD3)/6-311G** (kcal/mol) Gas phase | M06L/6-311+G** (kcal/mol) Gas phase | M06L/6-311G** (kcal/mol) in Acetonitrile solvent |
|------------------------------------------------------------------|------------------------------------|------------------------------------|-------------------------------------|-------------------------------------|------------------------------------------|-------------------------------------|--------------------------------------------------|
| <b>I<sub>0</sub></b>                                             | 0                                  | 0                                  | 0                                   | 0                                   | 0                                        | 0                                   | 0                                                |
| <b>I''</b>                                                       | -9.33                              | -7.13                              | -6.10                               | 20.08                               | 0.36                                     | -8.04                               | 0.31                                             |
| <b>TS<sub>1</sub>''</b>                                          | -8.84                              | -7.04                              | -5.63                               | 21.54                               | 1.55                                     | -7.16                               | 1.17                                             |
| <b>II''</b>                                                      | -14.89                             | -14.07                             | -11.69                              | 14.17                               | -6.07                                    | -14.85                              | -6.13                                            |
| <b>III''</b>                                                     | -14.98                             | -12.85                             | -10.09                              | 10.04                               | -14.50                                   | -14.48                              | -5.26                                            |
| <b>TS<sub>2</sub>''</b>                                          | 24.38                              | 27.30                              | 30.16                               | 80.04                               | 34.92                                    | 26.10                               | 36.18                                            |
| <b>IV''</b>                                                      | -11.50                             | -9.00                              | -6.49                               | -0.67                               | -16.52                                   | -14.35                              | -4.23                                            |
| <b>V</b>                                                         | -18.42                             | -16.55                             | -14.56                              | -8.70                               | -18.99                                   | -22.10                              | -14.88                                           |
| <b>TS<sub>3</sub></b>                                            | -10.34                             | -8.93                              | -6.84                               | 6.30                                | 4.99                                     | -10.06                              | -4.12                                            |

|                                    |        |        |        |        |        |        |        |
|------------------------------------|--------|--------|--------|--------|--------|--------|--------|
| <b>VI</b>                          | -18.17 | -16.68 | -16.28 | -13.70 | -19.83 | -20.92 | -17.47 |
| <b>TS<sub>3</sub><sup>''</sup></b> | 13.70  | 16.11  | 18.46  | 30.72  | 15.37  | 12.72  | 20.24  |
| <b>V<sup>''</sup></b>              | -5.16  | -4.04  | -2.30  | 4.16   | -5.55  | -7.61  | 3.28   |

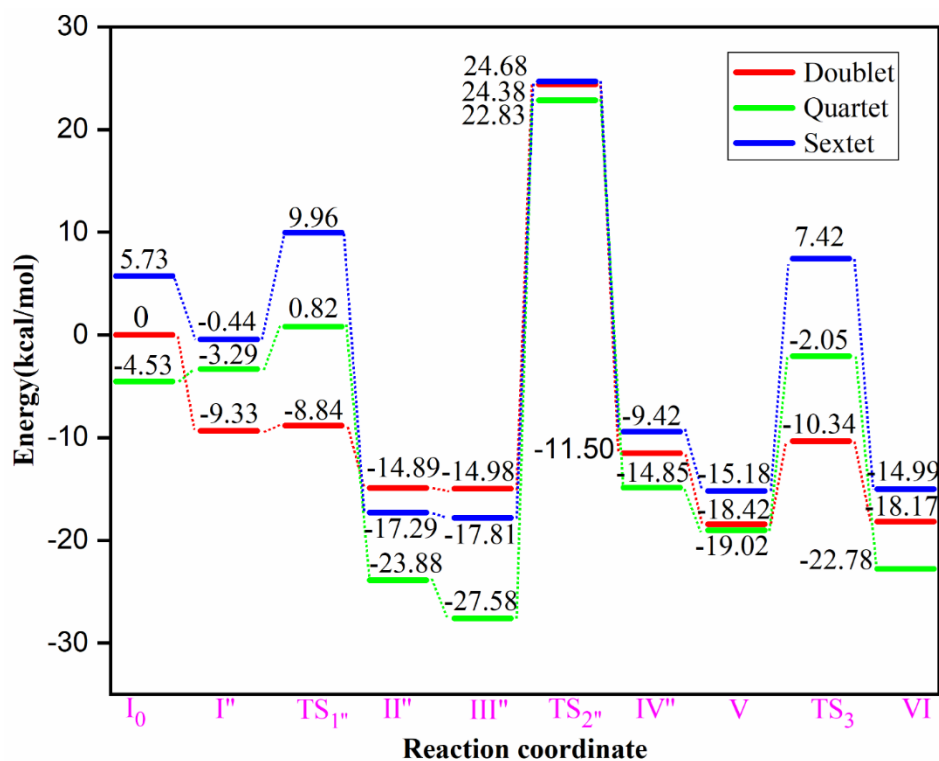

Figure S2: Energy profile diagram for the iron-catalysed hydrogenation of alkene via 2-1 mode in different spin states. The computations are performed within M06-L/6-311G\*\*,LANL2DZ level of theory.

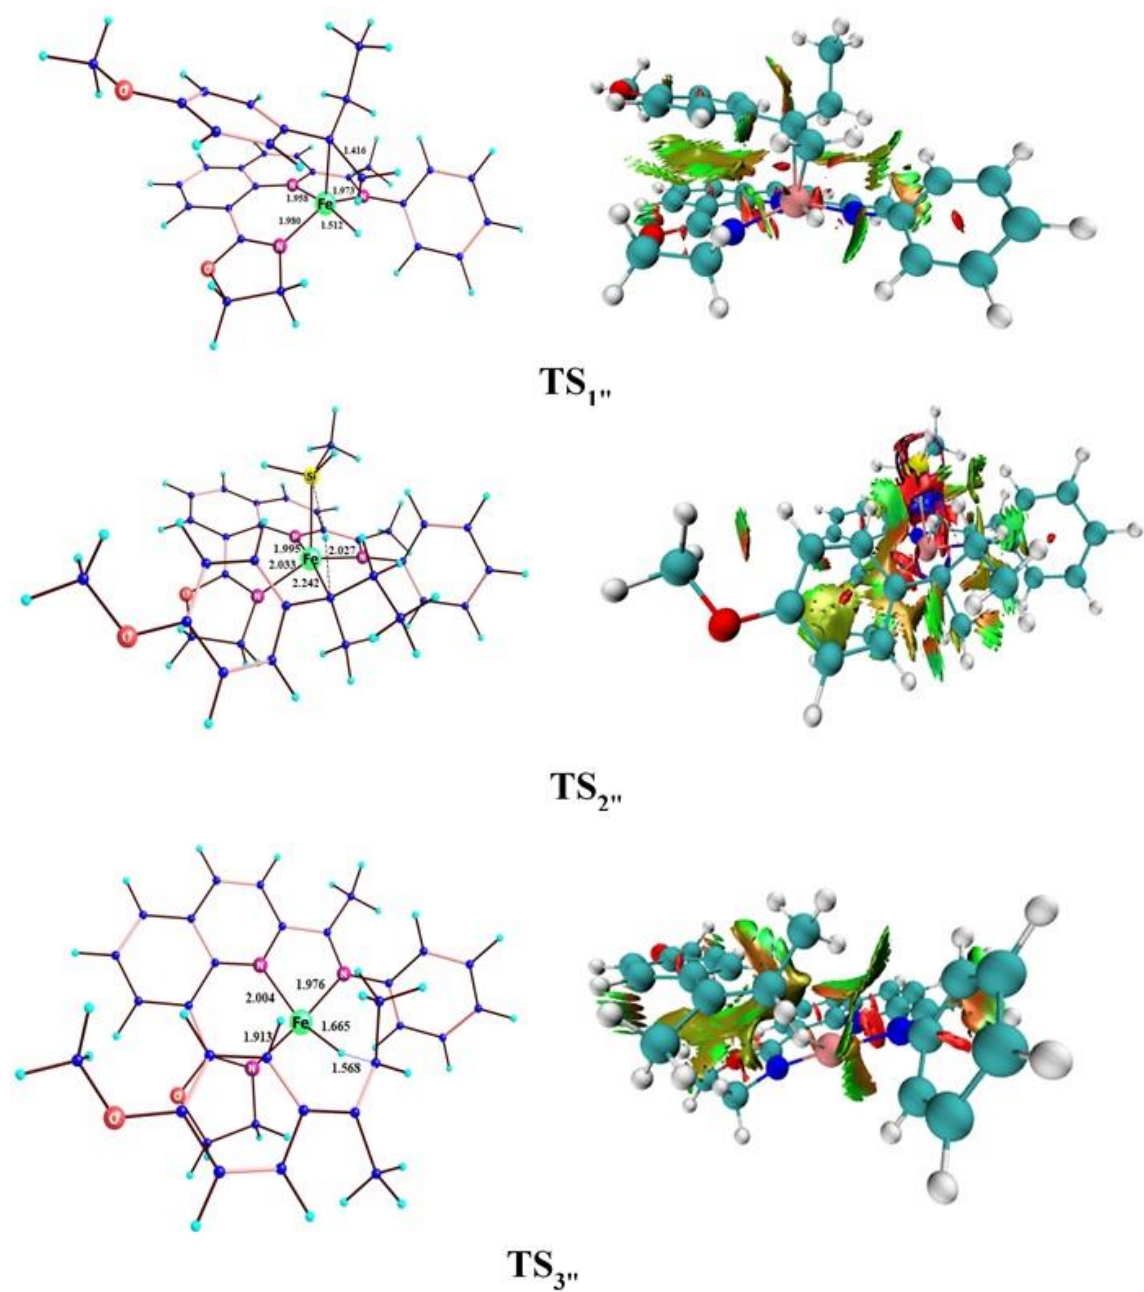

Figure S3: Optimized geometries of the transition states and the corresponding isosurface plots of the nonbonding interactions for 2-1 mode of interaction.

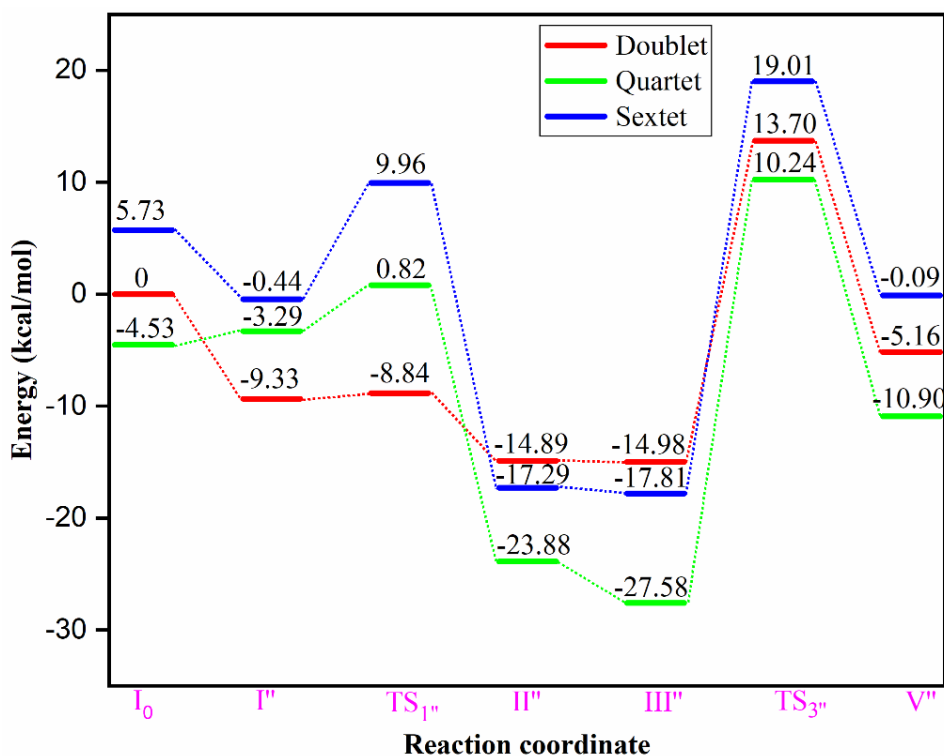

Figure S4: Energy profile diagram for the formation of isomeric alkene by-product in different spin states. The computations are performed within M06L/6-311G\*\*,LANL2DZ level of theory.

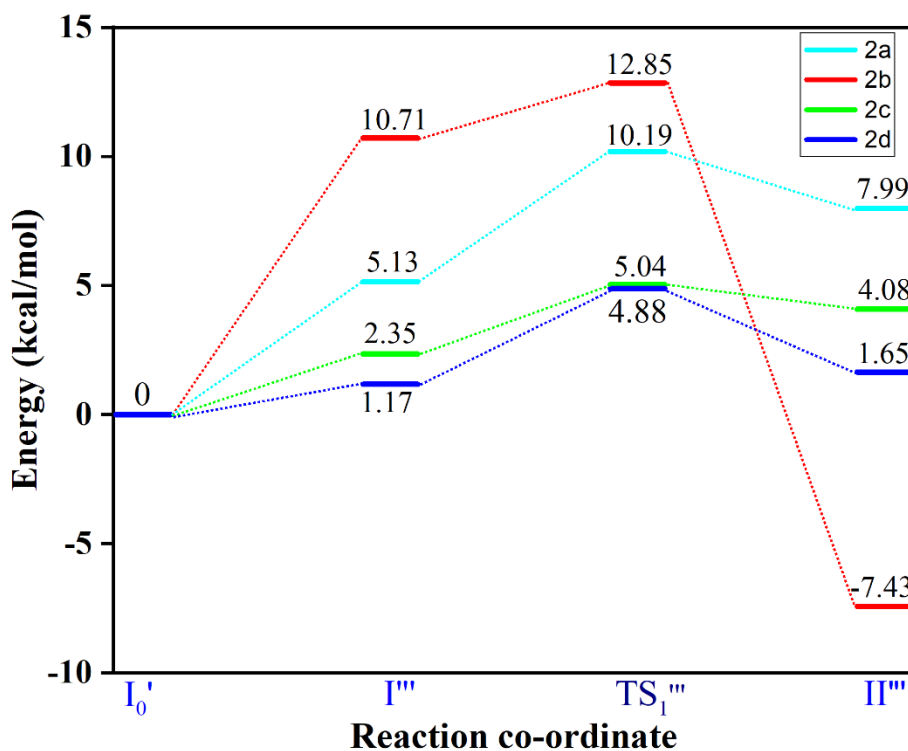

Figure S5: Energy profile diagram of four different possibilities for the formation of chiral alkane from alkene through different possible pathways. The computations are performed within M06L/6-311G\*\*,LANL2DZ level of theory.

Table S3: Calculated relative energy positions of different intermediate and transition states corresponding to Figure S3 at different levels of theories.

| Relative energies within different level of theories → Species ↓ | M06L/6-311G** (kcal/mol) Gas phase | M06L/Def2-svp (kcal/mol) Gas phase | M06L/Def2-tzvp (kcal/mol) Gas phase | B3LYP/6-311G** (kcal/mol) Gas phase | B3LYP(GD3)/6-311G** (kcal/mol) Gas phase | M06L/6-311+G** (kcal/mol) Gas phase | M06L/6-311G** (kcal/mol) in Acetonitrile solvent |
|------------------------------------------------------------------|------------------------------------|------------------------------------|-------------------------------------|-------------------------------------|------------------------------------------|-------------------------------------|--------------------------------------------------|
| <b>I<sub>0</sub>'</b>                                            | 0                                  | 0                                  | 0                                   | 0                                   | 0                                        | 0                                   | 0                                                |
| <b>I<sub>1</sub>'''(2a)</b>                                      | 5.13                               | 6.39                               | 11.84                               | 35.71                               | 10.97                                    | 7.48                                | 14.46                                            |
| <b>I<sub>1</sub>'''(2b)</b>                                      | 10.71                              | 14.17                              | 12.65                               | 38.19                               | 7.51                                     | 13.41                               | 19.80                                            |
| <b>I<sub>1</sub>'''(2c)</b>                                      | 2.35                               | 3.49                               | 4.11                                | 24.13                               | -5.10                                    | 5.17                                | 12.42                                            |
| <b>I<sub>1</sub>'''(2d)</b>                                      | 1.17                               | 2.69                               | 3.24                                | 29.41                               | 2.58                                     | 3.14                                | 10.57                                            |
| <b>TS<sub>1</sub>'''(2a)</b>                                     | 10.19                              | 11.03                              | 12.07                               | 40.23                               | 33.65                                    | 13.75                               | 19.42                                            |
| <b>TS<sub>1</sub>'''(2b)</b>                                     | 12.85                              | 13.73                              | 14.68                               | 40.32                               | 28.41                                    | 17.03                               | 21.75                                            |
| <b>TS<sub>1</sub>'''(2c)</b>                                     | 5.04                               | 5.56                               | 6.71                                | 43.47                               | 24.89                                    | 7.61                                | 14.88                                            |
| <b>TS<sub>1</sub>'''(2d)</b>                                     | 4.88                               | 5.38                               | 6.36                                | 32.67                               | 23.28                                    | 7.15                                | 14.84                                            |
| <b>II''''(2a)</b>                                                | 7.99                               | 8.37                               | 9.94                                | 17.23                               | -0.40                                    | 9.80                                | 14.84                                            |
| <b>II''''(2b)</b>                                                | -7.43                              | -7.23                              | -4.67                               | 11.42                               | -8.33                                    | -7.31                               | -2.54                                            |
| <b>II''''(2c)</b>                                                | 4.08                               | 3.78                               | 6.60                                | 6.51                                | -11.58                                   | 5.81                                | 11.04                                            |
| <b>II''''(2d)</b>                                                | 1.65                               | 1.58                               | 3.26                                | 12.90                               | -7.13                                    | 2.23                                | 10.68                                            |

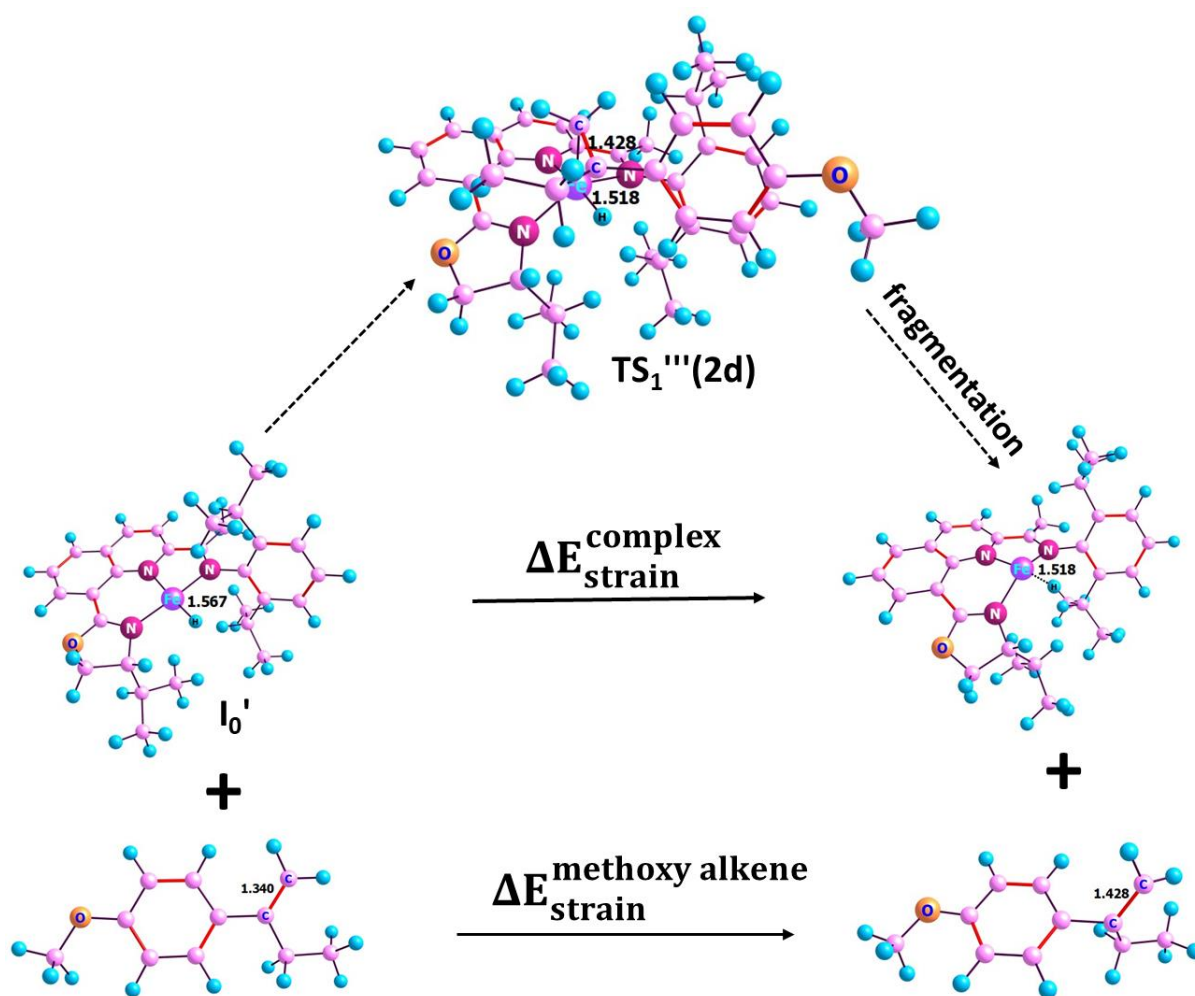

Figure S6: calculating of strain energy of  $TS_1'''(2d)$  originating from methoxy benzene and iron hydride reaction.

Table S4: Calculated strain energies in the all possible hydride transfer transition states ( $TS_1'''$ ).

| Different possibilities that alkene coordinate to active iron catalyst | $\Delta E_{\text{methoxybenzene (strain)}}$<br>(kcal/mol) | $\Delta E_{\text{Fe-complex (strain)}}$<br>(kcal/mol) | $\Delta E_{\text{Total(strain)}}$<br>(kcal/mol) |
|------------------------------------------------------------------------|-----------------------------------------------------------|-------------------------------------------------------|-------------------------------------------------|
| $TS_1'''(2a)$                                                          | 21.32                                                     | 17.37                                                 | 38.69                                           |
| $TS_1'''(2b)$                                                          | 24.03                                                     | 18.58                                                 | 42.61                                           |
| $TS_1'''(2c)$                                                          | 22.25                                                     | 12.59                                                 | 36.84                                           |
| $TS_1'''(2d)$                                                          | 19.11                                                     | 13.05                                                 | 32.16                                           |

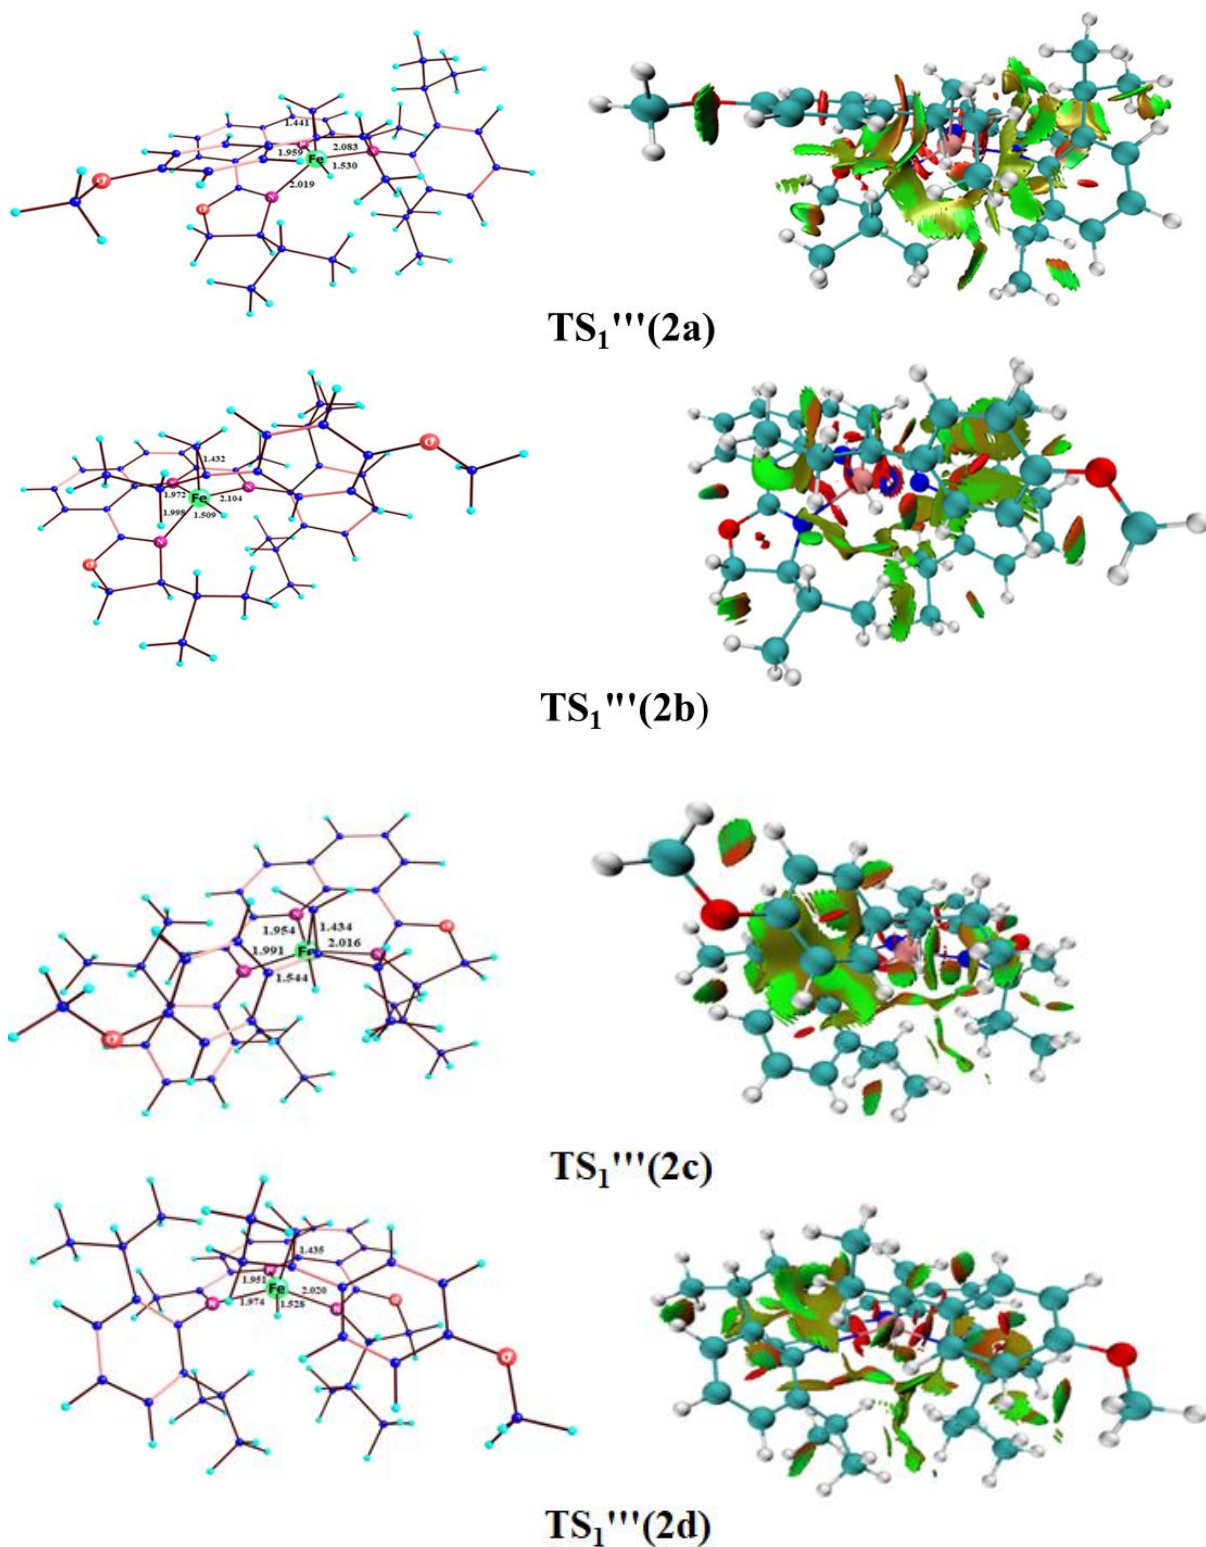

Figure S7: Optimized geometries of the transition state structures and the corresponding isosurface plots of the noncovalent interactions in four possible hydride transfer pathways.



Table S5: Calculated relative energy positions of different intermediate and transition states in absence of silane at different levels of theories.

| Relative energies within different level of theories →<br>Species ↓ | M06L/6-311G** (kcal/mol)<br>Gas phase | M06L/Def2-svp (kcal/mol)<br>Gas phase | M06L/Def2-tzvp (kcal/mol)<br>Gas phase | B3LYP/6-311G** (kcal/mol)<br>Gas phase | B3LYP(GD3)/6-311G** (kcal/mol)<br>Gas phase | M06L/6311+G** (kcal/mol)<br>Gas phase | M06L/6-311G** (kcal/mol)<br>in Acetonitrile solvent |
|---------------------------------------------------------------------|---------------------------------------|---------------------------------------|----------------------------------------|----------------------------------------|---------------------------------------------|---------------------------------------|-----------------------------------------------------|
| <b>I<sub>0</sub></b>                                                | 0                                     | 0                                     | 0                                      | 0                                      | 0                                           | 0                                     | 0                                                   |
| <b>I</b>                                                            | -2.02                                 | 0.62                                  | 0.93                                   | 36.02                                  | 15.57                                       | -1.01                                 | 6.63                                                |
| <b>TS<sub>1</sub></b>                                               | 2.55                                  | 4.66                                  | 5.08                                   | 36.50                                  | 17.02                                       | 4.13                                  | 11.60                                               |
| <b>II</b>                                                           | -13.90                                | -11.64                                | -9.15                                  | 2.90                                   | -13.47                                      | -14.40                                | -8.32                                               |
| <b>III</b>                                                          | -14.54                                | -12.36                                | -8.77                                  | 2.67                                   | -13.48                                      | -14.50                                | -6.44                                               |
| <b>III'</b>                                                         | -12.81                                | -10.25                                | -7.22                                  | 4.62                                   | -11.96                                      | -12.83                                | -5.44                                               |
| <b>IV'</b>                                                          | -4.82                                 | -3.07                                 | -0.67                                  | 22.25                                  | 3.24                                        | -2.57                                 | 3.51                                                |
| <b>TS<sub>4</sub></b>                                               | 5.84                                  | 0.27                                  | 9.86                                   | 26.38                                  | 10.14                                       | 10.38                                 | 13.63                                               |
| <b>V'</b>                                                           | -22.52                                | -22.40                                | -17.26                                 | -12.74                                 | -21.98                                      | -24.11                                | -16.13                                              |

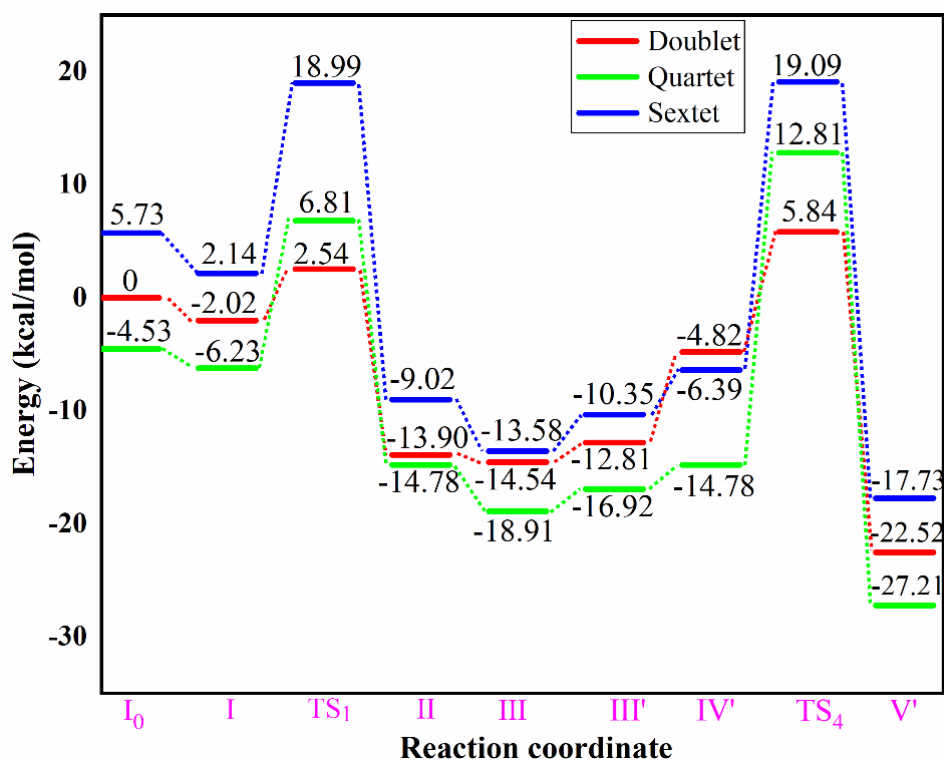

Figure S8: Energy profile diagram for catalytic hydrogenation of alkene via 1-2 mode in absence of silane in different spin states. The computations are performed within M06L/6-311G\*\*, LANL2DZ level of theory.

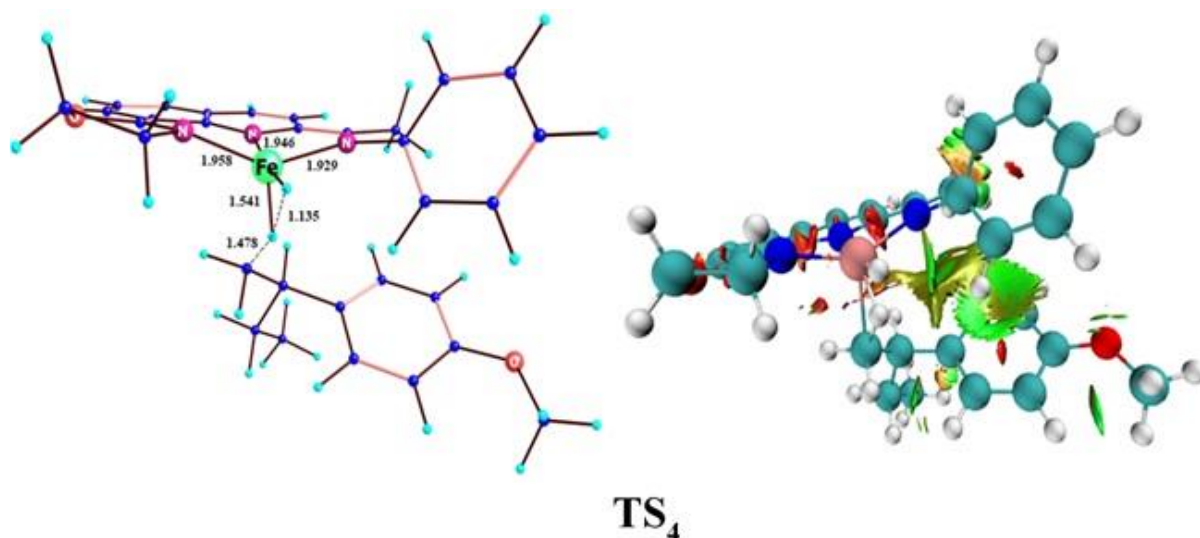

Figure S9: Optimized geometry of the transition state structure, TS<sub>4</sub> and the corresponding isosurface plots of the noncovalent interactions.

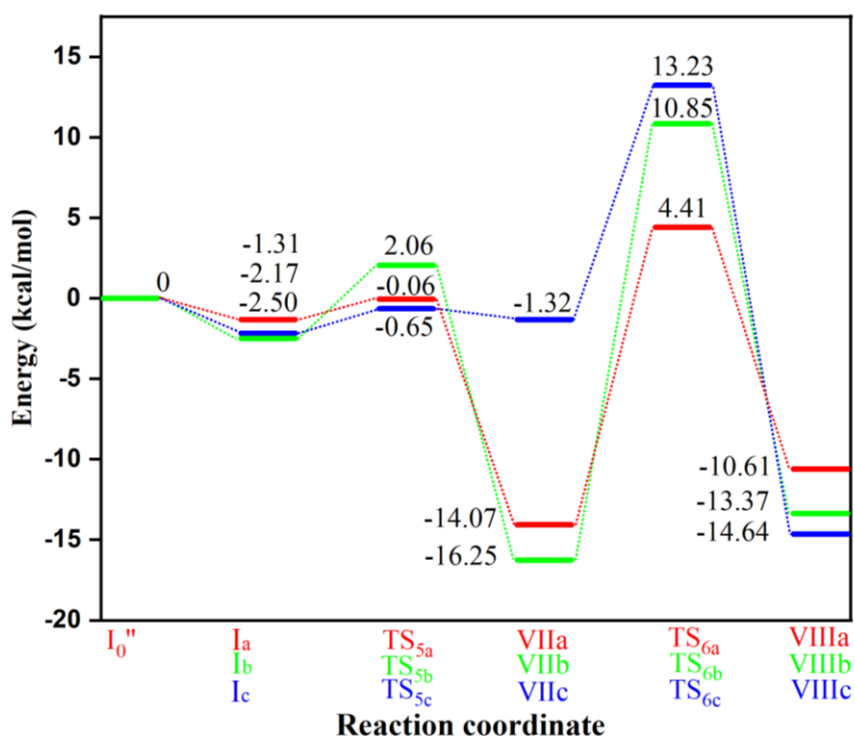

Figure S10: Energy profile diagram for the formation of Fe-catalysed isomeric alkane from alkene I'. The computations are performed within M06L/6-311G\*\*, LANL2DZ level of theory.

Table S6: Calculated relative energy positions of different intermediate and transition states for the formation of Fe-catalysed isomeric alkane at different levels of theories.

| Relative energies within different level of theories →<br>Species ↓ | M06L/<br>6-311G**<br>(kcal/mol)<br>Gas phase | M06L/<br>Def2-svp<br>(kcal/mol)<br>Gas phase | M06L/<br>Def2-tzvp<br>(kcal/mol)<br>Gas phase | M06L/<br>6-311+G**<br>(kcal/mol)<br>Gas phase | M06L/<br>6-311G**<br>(kcal/mol)<br>in Acetonitrile<br>solvent) |
|---------------------------------------------------------------------|----------------------------------------------|----------------------------------------------|-----------------------------------------------|-----------------------------------------------|----------------------------------------------------------------|
| <b>I<sub>0</sub>''</b>                                              | 0                                            | 0                                            | 0                                             | 0                                             | 0                                                              |
| <b>I<sub>a</sub></b>                                                | -1.31                                        | 1.45                                         | 1.71                                          | -1.31                                         | 8.02                                                           |
| <b>TS<sub>5a</sub></b>                                              | -0.06                                        | 3.17                                         | 4.27                                          | 3.40                                          | 11.01                                                          |
| <b>VII<sub>a</sub></b>                                              | -14.07                                       | -9.62                                        | -6.43                                         | -11.86                                        | -6.46                                                          |
| <b>TS<sub>6a</sub></b>                                              | 4.41                                         | 12.14                                        | 14.35                                         | 10.10                                         | 18.50                                                          |
| <b>VIII<sub>a</sub></b>                                             | -10.61                                       | -3.17                                        | -0.95                                         | -8.08                                         | 1.91                                                           |
| <b>I<sub>b</sub></b>                                                | -2.17                                        | 0.75                                         | 1.34                                          | -2.17                                         | 7.95                                                           |
| <b>TS<sub>5b</sub></b>                                              | 2.06                                         | 4.44                                         | 5.29                                          | 1.56                                          | 8.61                                                           |
| <b>VII<sub>b</sub></b>                                              | -16.25                                       | -14.37                                       | -10.50                                        | -1.33                                         | 5.39                                                           |
| <b>TS<sub>6b</sub></b>                                              | 10.85                                        | 13.10                                        | 15.76                                         | 14.80                                         | 23.56                                                          |
| <b>VIII<sub>b</sub></b>                                             | -13.37                                       | -10.91                                       | -8.71                                         | -16.61                                        | -6.97                                                          |
| <b>I<sub>c</sub></b>                                                | -2.50                                        | 0.56                                         | 1.23                                          | -2.50                                         | 6.49                                                           |
| <b>TS<sub>5c</sub></b>                                              | -0.65                                        | 1.89                                         | 2.91                                          | 3.38                                          | 12.58                                                          |
| <b>VII<sub>c</sub></b>                                              | -1.32                                        | 1.65                                         | 4.14                                          | 11.93                                         | -6.55                                                          |
| <b>TS<sub>6c</sub></b>                                              | 13.23                                        | 15.45                                        | 17.61                                         | 11.56                                         | 20.14                                                          |
| <b>VIII<sub>c</sub></b>                                             | -14.64                                       | -11.47                                       | -8.84                                         | -15.09                                        | -8.90                                                          |

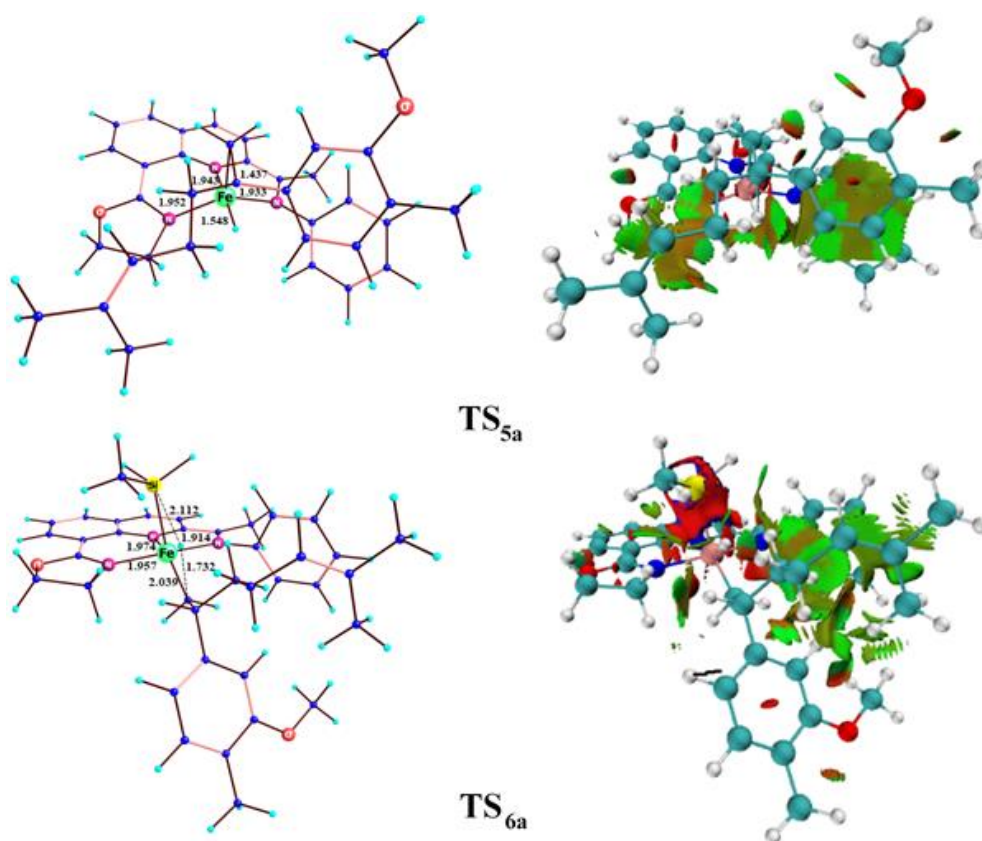

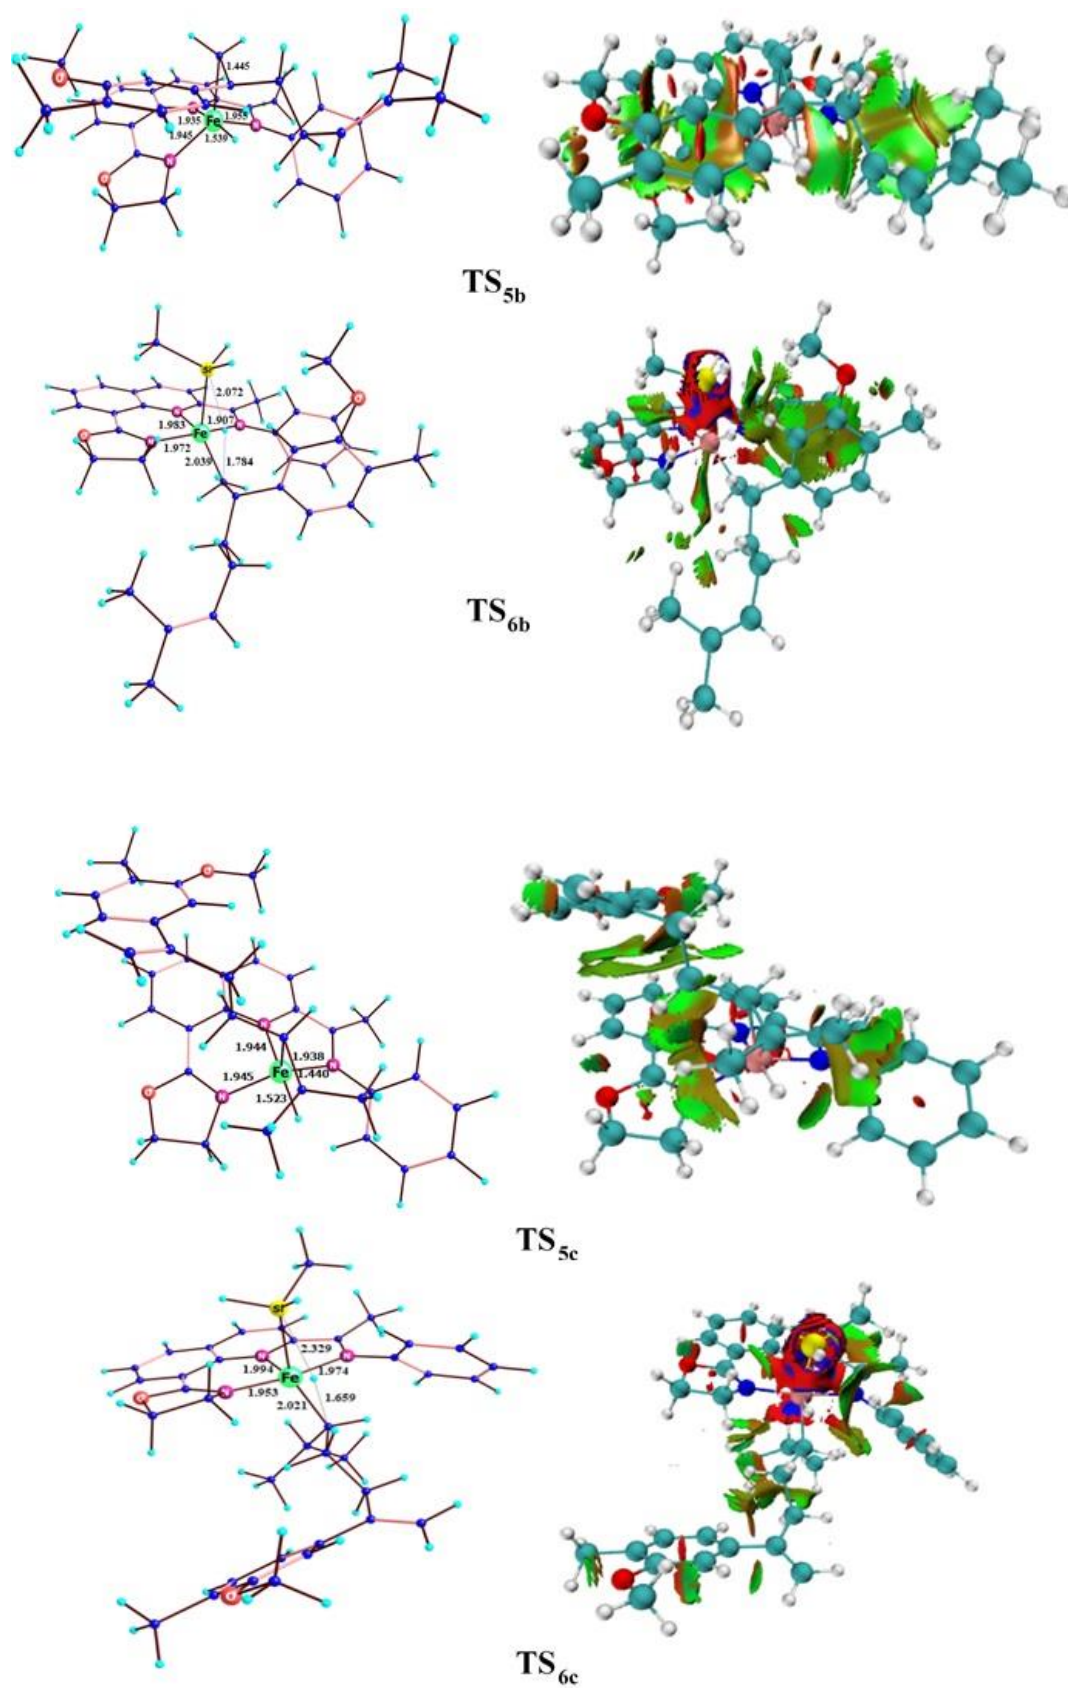

Figure S11: Optimized geometries of the transition state structures and the corresponding isosurface plots of the noncovalent interactions for the formation of Fe-catalysed isomeric alkane from alkene I'.

**Cartesian coordinates of the optimized structures using M06L/6-311G\*\*,LANL2DZ**

**level of theory.**

**Doublet**

**I<sub>0</sub>**

0 2

|    |             |             |             |
|----|-------------|-------------|-------------|
| Fe | 0.02208700  | -0.01728300 | -0.01117600 |
| N  | -0.00406400 | -0.05418200 | 1.93561200  |
| C  | 1.19471200  | -0.10055900 | 2.77605800  |
| C  | -1.04610600 | -0.10266500 | 2.71148000  |
| C  | 0.64403100  | 0.03485800  | 4.19191900  |
| H  | 1.72081000  | -1.04530000 | 2.60357200  |
| H  | 0.99669900  | -0.72425200 | 4.89110100  |
| N  | -1.99915100 | -0.07693500 | -0.05518200 |
| C  | -2.87975100 | -0.12587100 | 0.97553800  |
| C  | -3.83565900 | -0.13834400 | -1.63492300 |
| C  | -4.29492400 | -0.17209200 | 0.73712000  |
| C  | -4.74113600 | -0.17632500 | -0.61238000 |
| H  | -4.17252400 | -0.13613500 | -2.66493100 |
| H  | -5.80776500 | -0.20961600 | -0.81054300 |
| C  | -2.44045700 | -0.13278100 | 2.34015200  |
| C  | -5.19520300 | -0.21385100 | 1.81054800  |
| C  | -4.74856000 | -0.21369200 | 3.12175000  |
| H  | -5.45350600 | -0.24551300 | 3.94453400  |
| C  | -3.38606500 | -0.17380100 | 3.37635300  |
| H  | -3.02466100 | -0.17524000 | 4.39675000  |
| H  | -6.25812600 | -0.24737200 | 1.58847200  |
| O  | -0.78011300 | -0.13737900 | 4.03535000  |
| C  | -2.45670100 | -0.08448100 | -1.35489500 |
| C  | -1.45234300 | -0.01626300 | -2.37297400 |
| C  | 0.87132800  | 0.27632500  | -2.85475500 |
| C  | 2.00014300  | -0.54791600 | -2.81641000 |
| C  | 0.84197900  | 1.34130100  | -3.76202300 |
| C  | 3.05713200  | -0.32857200 | -3.68682800 |
| C  | 1.91136700  | 1.56626500  | -4.62017500 |
| C  | 3.02090500  | 0.72881900  | -4.59325900 |
| H  | 3.92254600  | -0.98273200 | -3.65097800 |
| H  | 1.87808900  | 2.40529300  | -5.30812400 |
| H  | 3.85555800  | 0.90442200  | -5.26357800 |
| H  | 2.03067600  | -1.34599700 | -2.08341100 |
| H  | -0.01594100 | 2.00657000  | -3.76897400 |
| H  | 1.88093500  | 0.70044800  | 2.49585300  |
| H  | 0.81310300  | 1.02323100  | 4.62973600  |
| N  | -0.18771400 | 0.05428700  | -1.94824700 |
| C  | -1.84116600 | -0.09224300 | -3.81706000 |
| H  | -0.99019700 | -0.36136500 | -4.44155300 |
| H  | -2.62004500 | -0.84353300 | -3.96683600 |
| H  | -2.23586700 | 0.85662200  | -4.19781700 |
| H  | 1.58131200  | -0.00753800 | -0.05493400 |

**I**

02

|    |             |             |             |
|----|-------------|-------------|-------------|
| Fe | 0.19831600  | -0.08247900 | 0.07915300  |
| N  | 0.02188200  | -0.07586600 | 2.02805100  |
| C  | 1.11755500  | -0.03819000 | 2.99716900  |
| C  | -1.08698400 | 0.19093400  | 2.66476200  |
| C  | 0.46332100  | 0.48000800  | 4.27640300  |
| H  | 1.54118600  | -1.04186800 | 3.10537700  |
| H  | 0.61960200  | -0.15315100 | 5.15132600  |
| N  | -1.72749700 | -0.59624500 | -0.03734200 |
| C  | -2.71941800 | -0.29718400 | 0.83248600  |
| C  | -3.36488200 | -1.46294600 | -1.60062200 |
| C  | -4.09792400 | -0.47420000 | 0.47662400  |
| C  | -4.38273900 | -1.05727900 | -0.79195900 |
| H  | -3.57588400 | -1.93140300 | -2.55497500 |
| H  | -5.41912100 | -1.18956400 | -1.08599000 |
| C  | -2.42426500 | 0.18782500  | 2.14808300  |
| C  | -5.10433700 | -0.07865900 | 1.36250500  |
| C  | -4.79732400 | 0.45467600  | 2.60853300  |
| H  | -5.58985600 | 0.76060300  | 3.28225600  |
| C  | -3.47506100 | 0.56598800  | 3.00167400  |
| H  | -3.22618900 | 0.93184000  | 3.98998700  |
| H  | -6.13944800 | -0.20198200 | 1.05675900  |
| O  | -0.94802500 | 0.47952800  | 3.98012100  |
| C  | -2.02002200 | -1.24509900 | -1.21464800 |
| C  | -0.89077000 | -1.65261200 | -1.96521400 |
| C  | 1.50432500  | -1.67412300 | -2.07517500 |
| C  | 2.52973500  | -2.25474500 | -1.31879200 |
| C  | 1.73052200  | -1.42562600 | -3.43324100 |
| C  | 3.72959700  | -2.61268900 | -1.91538500 |
| C  | 2.93804900  | -1.77493700 | -4.02439500 |
| C  | 3.93948100  | -2.37980300 | -3.27273900 |
| H  | 4.50729100  | -3.07685400 | -1.31679200 |
| H  | 3.10205200  | -1.54927400 | -5.07424400 |
| H  | 4.87951200  | -2.66092800 | -3.73755000 |
| H  | 2.35538300  | -2.41706300 | -0.26076500 |
| H  | 0.96744800  | -0.92249600 | -4.01674100 |
| H  | 1.91634700  | 0.60962700  | 2.62856600  |
| H  | 0.75335100  | 1.50494300  | 4.52672400  |
| N  | 0.29860800  | -1.32450900 | -1.42692600 |
| C  | -1.05762300 | -2.48757900 | -3.19755500 |
| H  | -0.18703000 | -3.12241800 | -3.36429100 |
| H  | -1.93118400 | -3.13542100 | -3.10774000 |
| H  | -1.19268700 | -1.88723900 | -4.10410000 |
| C  | -0.33123900 | 1.77732000  | -0.62675500 |
| H  | 1.69241700  | -0.18157600 | 0.28625200  |
| C  | 1.06610400  | 1.83101200  | -0.53180500 |
| C  | 1.90470600  | 1.64814900  | -1.74384300 |
| C  | 3.23155500  | 1.21750300  | -1.64390500 |
| C  | 1.43879700  | 1.98564000  | -3.02214000 |
| C  | 4.05917700  | 1.11296200  | -2.75273800 |
| H  | 3.61604300  | 0.91839100  | -0.67286300 |
| C  | 2.24881300  | 1.88483500  | -4.14171700 |
| H  | 0.42536200  | 2.35771400  | -3.13917300 |
| C  | 3.56398300  | 1.43855700  | -4.01627200 |

|   |             |             |             |
|---|-------------|-------------|-------------|
| H | 5.06970200  | 0.74298600  | -2.62802400 |
| H | 1.88189300  | 2.14637900  | -5.12868000 |
| C | 1.75752400  | 2.59145100  | 0.59053700  |
| H | 2.52207000  | 1.95339200  | 1.04997000  |
| C | 0.85983300  | 3.18627100  | 1.66106800  |
| H | 1.45573700  | 3.66068200  | 2.44563400  |
| H | 0.19867800  | 3.95227600  | 1.24710200  |
| H | 0.22131800  | 2.43904500  | 2.13670700  |
| O | 4.27281000  | 1.32806500  | -5.17634800 |
| C | 5.59567800  | 0.84900500  | -5.07320100 |
| H | 6.22297800  | 1.51283200  | -4.46541600 |
| H | 5.62670400  | -0.15932300 | -4.64077100 |
| H | 5.98901400  | 0.81768300  | -6.08829400 |
| H | -0.96546900 | 2.24550200  | 0.12122200  |
| H | -0.81954500 | 1.58283800  | -1.57803100 |
| H | 2.32555900  | 3.40801400  | 0.12240000  |

### TS<sub>1</sub>

0 2

|    |             |             |             |
|----|-------------|-------------|-------------|
| Fe | -0.01296500 | 0.03801000  | 0.00709700  |
| N  | -0.02517000 | -0.00189400 | 1.95458600  |
| C  | 1.11654900  | 0.06807300  | 2.86690400  |
| C  | -1.11233500 | 0.17724800  | 2.66388900  |
| C  | 0.51252300  | 0.58139300  | 4.17101600  |
| H  | 1.56244800  | -0.92793300 | 2.96550600  |
| H  | 0.78651300  | 0.00371700  | 5.05489000  |
| N  | -1.84072400 | -0.59101900 | -0.02130000 |
| C  | -2.80034200 | -0.38164900 | 0.91269800  |
| C  | -3.49054100 | -1.59602500 | -1.48798200 |
| C  | -4.17977000 | -0.65483800 | 0.62696800  |
| C  | -4.49007400 | -1.25267500 | -0.63059800 |
| H  | -3.71858200 | -2.08772100 | -2.42658900 |
| H  | -5.52877900 | -1.45688800 | -0.86965800 |
| C  | -2.46819900 | 0.09690500  | 2.22194100  |
| C  | -5.16014000 | -0.34402800 | 1.57153100  |
| C  | -4.82474400 | 0.19307900  | 2.81110300  |
| H  | -5.60075800 | 0.43101700  | 3.53020400  |
| C  | -3.49719600 | 0.38930200  | 3.13853700  |
| H  | -3.22038700 | 0.75360900  | 4.11999000  |
| H  | -6.19855300 | -0.54185700 | 1.32130800  |
| O  | -0.90788400 | 0.44740100  | 3.97799100  |
| C  | -2.14407600 | -1.28699800 | -1.17811400 |
| C  | -1.02492200 | -1.63957100 | -1.95823400 |
| C  | 1.37010700  | -1.59617900 | -2.09230900 |
| C  | 2.38044600  | -2.18976900 | -1.32599000 |
| C  | 1.61471600  | -1.34785700 | -3.44836600 |
| C  | 3.57967900  | -2.57301200 | -1.91110000 |
| C  | 2.82121300  | -1.71929600 | -4.02672500 |
| C  | 3.80298900  | -2.34809800 | -3.26643200 |
| H  | 4.34314200  | -3.05231000 | -1.30591600 |
| H  | 3.00170600  | -1.49767500 | -5.07489600 |
| H  | 4.73989500  | -2.65012500 | -3.72426900 |

|   |             |             |             |
|---|-------------|-------------|-------------|
| H | 2.18978200  | -2.35378300 | -0.26958300 |
| H | 0.86336700  | -0.83329100 | -4.03816700 |
| H | 1.88660400  | 0.72866600  | 2.46036000  |
| H | 0.73185900  | 1.63793700  | 4.35742000  |
| N | 0.16480100  | -1.25184900 | -1.44552900 |
| C | -1.17098100 | -2.47154900 | -3.19387000 |
| H | -0.30355100 | -3.11760100 | -3.33912000 |
| H | -2.05258600 | -3.11051100 | -3.12938200 |
| H | -1.27370600 | -1.87007100 | -4.10414200 |
| C | -0.27549300 | 1.81939800  | -0.79981300 |
| H | 1.49401700  | 0.36587000  | 0.04253300  |
| C | 1.14184700  | 1.73063800  | -0.57781500 |
| C | 2.04330200  | 1.59758600  | -1.77490200 |
| C | 3.32251400  | 1.05706600  | -1.64417700 |
| C | 1.68118600  | 2.10094900  | -3.02748700 |
| C | 4.20814500  | 0.99414100  | -2.71115600 |
| H | 3.62515900  | 0.64012400  | -0.68593800 |
| C | 2.54596700  | 2.03881100  | -4.10896700 |
| H | 0.70522200  | 2.55798300  | -3.15756300 |
| C | 3.81258300  | 1.47444500  | -3.96031500 |
| H | 5.17967000  | 0.53623500  | -2.57077600 |
| H | 2.25921700  | 2.41944300  | -5.08338400 |
| C | 1.77420100  | 2.64895400  | 0.47985000  |
| H | 2.61761300  | 2.12898100  | 0.95237300  |
| C | 0.84654200  | 3.22364000  | 1.53691600  |
| H | 1.41876500  | 3.72737400  | 2.32070400  |
| H | 0.16531700  | 3.96365000  | 1.11026700  |
| H | 0.22767800  | 2.45996000  | 2.01111800  |
| O | 4.57724500  | 1.41493600  | -5.08675000 |
| C | 5.85266300  | 0.82406300  | -4.96476300 |
| H | 6.49235700  | 1.37694600  | -4.26582800 |
| H | 5.78432800  | -0.21907700 | -4.63119500 |
| H | 6.29924900  | 0.85523900  | -5.95741800 |
| H | -0.89484700 | 2.43494100  | -0.15208000 |
| H | -0.67632100 | 1.67646700  | -1.80041700 |
| H | 2.23600500  | 3.48009700  | -0.06838700 |

Imaginary Frequency: -686.30

## II

0 2

|    |             |             |             |
|----|-------------|-------------|-------------|
| Fe | 0.08225200  | -0.17337500 | 0.06444200  |
| N  | 0.04318600  | -0.09149300 | 1.98822000  |
| C  | 1.19185200  | -0.08593900 | 2.90340100  |
| C  | -1.04125600 | -0.04158600 | 2.71822800  |
| C  | 0.57773500  | 0.36886100  | 4.21510200  |
| H  | 1.61436200  | -1.09640400 | 2.95962400  |
| H  | 0.92509400  | -0.16904800 | 5.09694300  |
| N  | -1.87577200 | -0.57538900 | -0.04341800 |
| C  | -2.79724300 | -0.45776400 | 0.95180400  |
| C  | -3.65008200 | -1.06101700 | -1.62921800 |
| C  | -4.19563900 | -0.62993300 | 0.68458900  |



|   |             |             |             |
|---|-------------|-------------|-------------|
| C | -4.58906000 | -0.94309100 | -0.64592300 |
| H | -3.94502900 | -1.28213200 | -2.64846500 |
| H | -5.64464600 | -1.07682500 | -0.86026200 |
| C | -2.41060600 | -0.16075300 | 2.30125900  |
| C | -5.14097100 | -0.48394100 | 1.70924700  |
| C | -4.74838600 | -0.17812300 | 3.00339800  |
| H | -5.48609900 | -0.06199300 | 3.78934200  |
| C | -3.40282400 | -0.02363400 | 3.28991900  |
| H | -3.08550100 | 0.20519300  | 4.29923300  |
| H | -6.19130900 | -0.61010700 | 1.46314300  |
| O | -0.82669900 | 0.09543500  | 4.05157300  |
| C | -2.28851400 | -0.86695900 | -1.32544400 |
| C | -1.25167500 | -0.92455800 | -2.30319000 |
| C | 1.06792400  | -0.55770400 | -2.74080800 |
| C | 2.21895700  | -1.29288400 | -2.44345700 |
| C | 1.07756100  | 0.30120600  | -3.84425800 |
| C | 3.34643200  | -1.18721800 | -3.24460100 |
| C | 2.21337000  | 0.41147500  | -4.63741000 |
| C | 3.35059700  | -0.33407600 | -4.34537200 |
| H | 4.23168600  | -1.76669000 | -3.00309400 |
| H | 2.21121700  | 1.09145300  | -5.48347100 |
| H | 4.23681300  | -0.24414300 | -4.96420300 |
| H | 2.21590700  | -1.93190000 | -1.56517100 |
| H | 0.19826200  | 0.90290200  | -4.05447100 |
| H | 1.97731400  | 0.58301100  | 2.54610100  |
| H | 0.69596200  | 1.44578600  | 4.38269800  |
| N | -0.03284300 | -0.62058700 | -1.86183000 |
| C | -1.54702000 | -1.33966000 | -3.71036200 |
| H | -0.64734800 | -1.69307000 | -4.21362000 |
| H | -2.28676500 | -2.14217000 | -3.73313200 |
| H | -1.94928600 | -0.51479800 | -4.30925000 |
| C | 1.74197700  | 0.94642400  | -0.09394400 |
| H | 0.99115500  | 2.24874600  | 1.47001700  |
| C | 1.62584900  | 2.32488500  | 0.57054000  |
| C | 2.95901500  | 2.86971900  | 1.03575100  |
| C | 3.12926400  | 3.36730400  | 2.32426300  |
| C | 4.07032900  | 2.90290600  | 0.18151800  |
| C | 4.34888300  | 3.88052500  | 2.76838300  |
| H | 2.28087900  | 3.36397000  | 3.00664900  |
| C | 5.28663700  | 3.41194900  | 0.59752200  |
| H | 3.97474200  | 2.51074800  | -0.82792100 |
| C | 5.43582000  | 3.90466900  | 1.89799000  |
| H | 4.43629200  | 4.25528000  | 3.78131200  |
| H | 6.14580500  | 3.43843200  | -0.06426200 |
| C | 0.92816400  | 3.33566400  | -0.35331700 |
| H | 0.89854600  | 4.30976000  | 0.15090300  |
| C | -0.47719600 | 2.92709500  | -0.76272700 |
| H | -0.99482500 | 3.73493700  | -1.28769400 |
| H | -0.46919400 | 2.05515100  | -1.42366900 |
| H | -1.08579600 | 2.66387200  | 0.11200800  |
| O | 6.67405600  | 4.38005300  | 2.21501600  |

|   |            |            |             |
|---|------------|------------|-------------|
| C | 6.84965700 | 4.88929800 | 3.51720300  |
| H | 6.18607400 | 5.74065400 | 3.71436200  |
| H | 6.67397800 | 4.12195400 | 4.28180500  |
| H | 7.88463000 | 5.22236700 | 3.57824600  |
| H | 2.08122000 | 1.06888900 | -1.12998000 |
| H | 2.51364600 | 0.33873300 | 0.40723300  |
| H | 1.54913400 | 3.48095900 | -1.24841500 |

### III

0 2

|    |             |             |             |
|----|-------------|-------------|-------------|
| Fe | 0.23714900  | -0.08945100 | -0.13644400 |
| N  | 0.09425200  | -0.02200900 | 1.79446200  |
| C  | 1.15753000  | 0.26738200  | 2.76203900  |
| C  | -1.02591900 | -0.13023500 | 2.46835000  |
| C  | 0.52640500  | -0.12302300 | 4.08439200  |
| H  | 2.05968600  | -0.30026600 | 2.53271700  |
| H  | 0.76773400  | -1.15366000 | 4.37390700  |
| N  | -1.75638400 | -0.03386900 | -0.36630700 |
| C  | -2.69702000 | -0.27088400 | 0.58395000  |
| C  | -3.46292100 | -0.15621400 | -2.08744600 |
| C  | -4.07041200 | -0.48401900 | 0.22683500  |
| C  | -4.41924700 | -0.41337200 | -1.14906900 |
| H  | -3.72199600 | -0.11421700 | -3.13943500 |
| H  | -5.45436000 | -0.57529000 | -1.43379500 |
| C  | -2.35624400 | -0.32643000 | 1.97836800  |
| C  | -5.03115500 | -0.75344300 | 1.20978300  |
| C  | -4.68085800 | -0.80691100 | 2.55262400  |
| H  | -5.43017900 | -1.01561300 | 3.30805700  |
| C  | -3.36681500 | -0.59045000 | 2.92510200  |
| H  | -3.08562100 | -0.62818000 | 3.96981600  |
| H  | -6.05784800 | -0.91867100 | 0.89661700  |
| O  | -0.88558700 | -0.05249600 | 3.81912900  |
| C  | -2.12083500 | 0.01661700  | -1.69299000 |
| C  | -1.05598700 | 0.20599100  | -2.62376000 |
| C  | 1.31828300  | 0.34429800  | -2.89930700 |
| C  | 1.57097400  | -0.50977100 | -3.97919200 |
| C  | 2.29376600  | 1.28058500  | -2.53825800 |
| C  | 2.76323300  | -0.41509500 | -4.68757400 |
| C  | 3.47606100  | 1.37865800  | -3.25550600 |
| C  | 3.71834700  | 0.53176800  | -4.33469200 |
| H  | 2.94838200  | -1.09214400 | -5.51556700 |
| H  | 4.21931200  | 2.11416000  | -2.96492200 |
| H  | 4.64839700  | 0.60267400  | -4.88815700 |
| H  | 0.83620600  | -1.26542900 | -4.24105700 |
| H  | 2.10857200  | 1.91593200  | -1.67707400 |
| H  | 1.41592500  | 1.33282200  | 2.71464300  |
| H  | 0.74780800  | 0.54261900  | 4.91847000  |
| N  | 0.16632000  | 0.22582100  | -2.10096800 |
| C  | -1.34885000 | 0.40699800  | -4.07809800 |
| H  | -0.51812300 | 0.89608700  | -4.58610900 |
| H  | -1.53215300 | -0.54188900 | -4.59721600 |

|   |             |             |             |
|---|-------------|-------------|-------------|
| H | -2.23946500 | 1.02340900  | -4.21445200 |
| C | 2.10730800  | -0.89487700 | -0.04426600 |
| H | 2.53028100  | -0.98545300 | -1.05477000 |
| H | 2.85108100  | -0.35213500 | 0.55404600  |
| C | 1.84312500  | -2.29795600 | 0.52447200  |
| H | 1.72742000  | -2.22609600 | 1.61823800  |
| C | 2.98108000  | -3.29088900 | 0.25135100  |
| H | 3.10391500  | -3.39123300 | -0.83562800 |
| H | 3.91793400  | -2.84859700 | 0.61256700  |
| C | 2.76602700  | -4.65706200 | 0.88000700  |
| H | 3.60357800  | -5.33288400 | 0.68859200  |
| H | 2.64894800  | -4.57917000 | 1.96638400  |
| H | 1.86080200  | -5.13468300 | 0.49287700  |
| C | 0.50747500  | -2.79484000 | -0.00519600 |
| C | -0.55922000 | -3.11866700 | 0.84282200  |
| C | 0.27429300  | -2.86312500 | -1.38123600 |
| C | -1.80891200 | -3.45278500 | 0.34768900  |
| H | -0.40802700 | -3.07620500 | 1.91999300  |
| C | -0.97217700 | -3.19843800 | -1.90163300 |
| H | 1.08163100  | -2.61287200 | -2.06638300 |
| C | -2.02833900 | -3.47680000 | -1.03163400 |
| H | -2.64191700 | -3.66805000 | 1.00911600  |
| H | -1.11469100 | -3.22004900 | -2.97651200 |
| O | -3.29777600 | -3.77194000 | -1.42741300 |
| C | -3.55428100 | -3.76253500 | -2.81317900 |
| H | -2.96893600 | -4.52579300 | -3.34119700 |
| H | -4.61482400 | -3.98216100 | -2.92892000 |
| H | -3.34013400 | -2.78064600 | -3.25604400 |

## TS<sub>2</sub>

0 2

|    |             |             |             |
|----|-------------|-------------|-------------|
| Fe | 0.09002000  | 0.02608800  | 0.02111000  |
| N  | 0.15055800  | -0.04383400 | 1.96032800  |
| C  | 1.36599600  | 0.08265900  | 2.77061500  |
| C  | -0.86095400 | 0.03662300  | 2.77399100  |
| C  | 0.86789200  | -0.21200800 | 4.17235700  |
| H  | 2.13943200  | -0.60844800 | 2.43281800  |
| H  | 0.99220000  | -1.26667400 | 4.44775200  |
| N  | -1.86934600 | 0.28144800  | 0.03658200  |
| C  | -2.72623500 | 0.24110300  | 1.09996000  |
| C  | -3.77074200 | 0.54842200  | -1.46006600 |
| C  | -4.14521900 | 0.31420800  | 0.90872200  |
| C  | -4.64018600 | 0.47531000  | -0.41385900 |
| H  | -4.13434900 | 0.66898900  | -2.47447700 |
| H  | -5.71328800 | 0.53396900  | -0.56726100 |
| C  | -2.25718200 | 0.10589100  | 2.44540000  |
| C  | -5.02039800 | 0.22685600  | 2.00068500  |
| C  | -4.54330000 | 0.08504700  | 3.29294900  |
| H  | -5.22770300 | 0.01951500  | 4.13107600  |
| C  | -3.17526600 | 0.03274000  | 3.50561600  |
| H  | -2.78393200 | -0.07122700 | 4.50968300  |

|    |             |             |             |
|----|-------------|-------------|-------------|
| H  | -6.08793100 | 0.27642500  | 1.80611100  |
| O  | -0.54316800 | 0.06358600  | 4.09420400  |
| C  | -2.38371500 | 0.43061800  | -1.23548500 |
| C  | -1.43114900 | 0.43058100  | -2.28659700 |
| C  | 0.84778900  | 0.08510100  | -2.86656900 |
| C  | 0.74401800  | -0.85871300 | -3.89731300 |
| C  | 2.02099300  | 0.84158000  | -2.76874200 |
| C  | 1.78429400  | -1.04290100 | -4.79899000 |
| C  | 3.05265600  | 0.66103700  | -3.68003000 |
| C  | 2.94500400  | -0.28367400 | -4.69645100 |
| H  | 1.68725900  | -1.78736000 | -5.58297900 |
| H  | 3.95126800  | 1.26328000  | -3.59158200 |
| H  | 3.75791200  | -0.42738400 | -5.39995600 |
| H  | -0.15963900 | -1.45629800 | -3.97517800 |
| H  | 2.11688200  | 1.57176400  | -1.97259500 |
| H  | 1.76012100  | 1.10267900  | 2.66520900  |
| H  | 1.29252400  | 0.41470200  | 4.95607300  |
| N  | -0.17297600 | 0.20915300  | -1.90027500 |
| C  | -1.83981500 | 0.75672800  | -3.68968200 |
| H  | -0.98517900 | 1.07018100  | -4.28913700 |
| H  | -2.30144500 | -0.09447900 | -4.20629000 |
| H  | -2.56858300 | 1.57135500  | -3.69970500 |
| C  | 1.71272900  | -1.21455500 | -0.11907100 |
| H  | 1.91879800  | -1.38765800 | -1.18161500 |
| H  | 2.68468000  | -0.99159500 | 0.33959100  |
| C  | 1.14693100  | -2.49387900 | 0.52322800  |
| H  | 1.19697700  | -2.39314800 | 1.61754300  |
| C  | 1.99116300  | -3.72050000 | 0.14009100  |
| H  | 1.94501400  | -3.85124000 | -0.94921700 |
| H  | 3.04224200  | -3.50354000 | 0.36858600  |
| C  | 1.55529700  | -4.99730100 | 0.83779100  |
| H  | 2.18950100  | -5.84449500 | 0.56533400  |
| H  | 1.60033000  | -4.88960300 | 1.92675900  |
| H  | 0.52467600  | -5.25943100 | 0.58169900  |
| C  | -0.31685800 | -2.68672600 | 0.17673900  |
| C  | -1.29736300 | -2.86973400 | 1.15914500  |
| C  | -0.73046800 | -2.70059000 | -1.15606400 |
| C  | -2.63549700 | -3.00093300 | 0.83094900  |
| H  | -1.00209500 | -2.87895000 | 2.20663500  |
| C  | -2.06817800 | -2.83339700 | -1.51032000 |
| H  | 0.01469000  | -2.58220200 | -1.93874500 |
| C  | -3.03272500 | -2.95978900 | -0.50813000 |
| H  | -3.39930200 | -3.10316600 | 1.59487500  |
| H  | -2.34926400 | -2.81479800 | -2.55736700 |
| O  | -4.37212400 | -3.04546600 | -0.73339500 |
| C  | -4.80293400 | -2.96479500 | -2.07400600 |
| H  | -4.41937500 | -3.79840500 | -2.67530000 |
| H  | -5.89057800 | -3.01424900 | -2.04812200 |
| H  | -4.49551500 | -2.01864800 | -2.53823700 |
| Si | 0.51376200  | 2.33058500  | 0.19148300  |
| H  | 1.49596100  | 0.48521600  | -0.04680800 |

|   |             |            |             |
|---|-------------|------------|-------------|
| H | 1.92283700  | 2.80142800 | 0.15842200  |
| C | -0.39803600 | 3.32517500 | -1.15916900 |
| H | -1.46167400 | 3.07634700 | -1.18166100 |
| H | -0.30655600 | 4.39905700 | -0.97495000 |
| H | 0.01411300  | 3.11602500 | -2.14976700 |
| H | 0.00041400  | 2.76456900 | 1.51618500  |

Imaginary Frequency: -365.49

#### IV

0 2

|    |             |             |             |
|----|-------------|-------------|-------------|
| Fe | 0.20687500  | -0.20284000 | 0.17138200  |
| N  | 0.49156500  | -0.05522600 | 2.04364300  |
| C  | 1.75187700  | 0.26996300  | 2.71671300  |
| C  | -0.44742400 | -0.12290600 | 2.95597200  |
| C  | 1.42682700  | 0.05225200  | 4.18693100  |
| H  | 2.55643600  | -0.37748500 | 2.35818400  |
| H  | 1.78363100  | -0.91392400 | 4.55968100  |
| N  | -1.74700000 | -0.55391600 | 0.36183000  |
| C  | -2.47890500 | -0.50630000 | 1.50496000  |
| C  | -3.77680000 | -0.79480400 | -0.94614300 |
| C  | -3.90518400 | -0.65439900 | 1.46720500  |
| C  | -4.52921000 | -0.77825000 | 0.19245600  |
| H  | -4.24838300 | -0.88517500 | -1.91835800 |
| H  | -5.61084300 | -0.86071900 | 0.14858800  |
| C  | -1.85495600 | -0.33299800 | 2.78598700  |
| C  | -4.64740400 | -0.68230600 | 2.65403000  |
| C  | -4.02125900 | -0.55991800 | 3.88745200  |
| H  | -4.60179500 | -0.59050300 | 4.80267300  |
| C  | -2.65081400 | -0.38120600 | 3.94662800  |
| H  | -2.16027000 | -0.26748000 | 4.90477900  |
| H  | -5.72570900 | -0.79589100 | 2.58785100  |
| O  | -0.01063800 | 0.04041900  | 4.23015200  |
| C  | -2.37045600 | -0.70872600 | -0.85841500 |
| C  | -1.49673300 | -0.80782200 | -1.97605900 |
| C  | 0.78506400  | -1.02547900 | -2.64375200 |
| C  | 0.73017800  | -2.28817900 | -3.25733200 |
| C  | 1.88887600  | -0.20477300 | -2.90657200 |
| C  | 1.74331000  | -2.71039500 | -4.10676300 |
| C  | 2.89072000  | -0.62720700 | -3.76958500 |
| C  | 2.82930800  | -1.88081500 | -4.37179900 |
| H  | 1.68768200  | -3.69654800 | -4.55706300 |
| H  | 3.73141000  | 0.02993600  | -3.96832800 |
| H  | 3.62096700  | -2.21036900 | -5.03598000 |
| H  | -0.10340600 | -2.94693200 | -3.03026300 |
| H  | 1.94022100  | 0.77027400  | -2.43838000 |
| H  | 2.03299900  | 1.30577500  | 2.48878500  |
| H  | 1.77715500  | 0.84282300  | 4.85139800  |
| N  | -0.19656400 | -0.63768200 | -1.71184300 |
| C  | -2.04205500 | -1.01233900 | -3.35602600 |
| H  | -1.28661100 | -0.81103600 | -4.11467600 |
| H  | -2.41086200 | -2.03074600 | -3.51975800 |

|    |             |             |             |
|----|-------------|-------------|-------------|
| H  | -2.88441200 | -0.33885300 | -3.53526300 |
| C  | 3.81289200  | -1.59015100 | -0.12484900 |
| H  | 3.44465400  | -1.91273100 | -1.10388800 |
| H  | 4.86905700  | -1.33483300 | -0.24936700 |
| C  | 3.63426600  | -2.68589100 | 0.92300000  |
| H  | 4.12426800  | -2.36038000 | 1.85439100  |
| C  | 4.33658900  | -3.97409200 | 0.46512900  |
| H  | 3.86179100  | -4.31147100 | -0.46663500 |
| H  | 5.37213300  | -3.72740800 | 0.19909700  |
| C  | 4.31797300  | -5.09134500 | 1.49181700  |
| H  | 4.85814000  | -5.97214700 | 1.13719200  |
| H  | 4.78602600  | -4.77627100 | 2.43042700  |
| H  | 3.29653300  | -5.40293100 | 1.72743300  |
| C  | 2.17955000  | -2.93574900 | 1.25238300  |
| C  | 1.74671300  | -3.09880800 | 2.57230600  |
| C  | 1.21885300  | -3.04308600 | 0.24709700  |
| C  | 0.41738800  | -3.34152500 | 2.88078400  |
| H  | 2.47650700  | -3.03395300 | 3.37763700  |
| C  | -0.12275600 | -3.29365600 | 0.53267500  |
| H  | 1.51477100  | -2.93806700 | -0.79346500 |
| C  | -0.53170200 | -3.44080300 | 1.85933200  |
| H  | 0.08317300  | -3.45070600 | 3.90786500  |
| H  | -0.83794700 | -3.35181500 | -0.28049700 |
| O  | -1.81124500 | -3.67200500 | 2.25069400  |
| C  | -2.76120100 | -3.92445800 | 1.23363700  |
| H  | -2.50090500 | -4.82444300 | 0.66254300  |
| H  | -3.71287200 | -4.07619000 | 1.74067300  |
| H  | -2.85878400 | -3.07914100 | 0.54345000  |
| Si | 1.07204800  | 2.01495800  | -0.22553700 |
| H  | 3.27193600  | -0.67306200 | 0.13327800  |
| H  | 0.88061300  | 2.60945800  | -1.57292900 |
| C  | 0.11903100  | 3.14109600  | 1.01048500  |
| H  | 0.33620500  | 2.86997700  | 2.04758600  |
| H  | 0.36791800  | 4.19813400  | 0.88330500  |
| H  | -0.96047700 | 3.03463500  | 0.87371600  |
| H  | 2.52403300  | 2.20435700  | 0.06464000  |

## V

02

|    |             |             |             |
|----|-------------|-------------|-------------|
| Fe | 0.02231100  | 0.14987600  | -0.00222500 |
| N  | 0.03851200  | 0.13114100  | 1.91729800  |
| C  | 1.20432500  | 0.16955900  | 2.81021400  |
| C  | -1.03095300 | 0.08827700  | 2.67154600  |
| C  | 0.62615900  | -0.27672500 | 4.14054200  |
| H  | 2.00063000  | -0.48007300 | 2.44447100  |
| H  | 0.76276700  | -1.34852700 | 4.32285000  |
| N  | -1.93166600 | 0.56616500  | -0.07544400 |
| C  | -2.82649300 | 0.49403500  | 0.94456200  |
| C  | -3.72314900 | 1.09779800  | -1.62083000 |
| C  | -4.22593400 | 0.69954800  | 0.71012500  |
| C  | -4.64132700 | 1.01224700  | -0.61399700 |

|    |             |             |             |
|----|-------------|-------------|-------------|
| H  | -4.03735400 | 1.32156100  | -2.63367800 |
| H  | -5.69754700 | 1.17318000  | -0.80513800 |
| C  | -2.41022000 | 0.20750100  | 2.28660500  |
| C  | -5.14728100 | 0.58160500  | 1.75934500  |
| C  | -4.72845900 | 0.27540900  | 3.04542600  |
| H  | -5.44860700 | 0.17885500  | 3.84995600  |
| C  | -3.37930300 | 0.09721700  | 3.30057500  |
| H  | -3.04181500 | -0.12771000 | 4.30423400  |
| H  | -6.20085000 | 0.72793300  | 1.53962100  |
| O  | -0.78603100 | -0.02650600 | 3.99933400  |
| C  | -2.36096100 | 0.86412200  | -1.34899500 |
| C  | -1.34117800 | 0.88721100  | -2.34681200 |
| C  | 0.96775100  | 0.47022000  | -2.82428200 |
| C  | 0.92143500  | -0.28772700 | -3.99753000 |
| C  | 2.16230000  | 1.10881800  | -2.47685900 |
| C  | 2.04520600  | -0.39424500 | -4.80795100 |
| C  | 3.27777600  | 1.00790100  | -3.29441000 |
| C  | 3.22550300  | 0.25537200  | -4.46507700 |
| H  | 1.99969100  | -1.00074000 | -5.70688400 |
| H  | 4.19663800  | 1.51076500  | -3.01102300 |
| H  | 4.10234400  | 0.16557100  | -5.09704800 |
| H  | 0.01257900  | -0.82530200 | -4.24747200 |
| H  | 2.20108900  | 1.67102400  | -1.54792900 |
| H  | 1.59955400  | 1.19207800  | 2.84221700  |
| H  | 0.98099900  | 0.28174700  | 5.00625100  |
| N  | -0.12347600 | 0.54063600  | -1.93057000 |
| C  | -1.65305700 | 1.33069700  | -3.74149800 |
| H  | -0.75783000 | 1.68417400  | -4.25237700 |
| H  | -2.07402100 | 0.52279100  | -4.35027500 |
| H  | -2.38342700 | 2.14174000  | -3.73537800 |
| H  | 2.18368300  | -1.93503800 | -1.55935600 |
| H  | 3.16868000  | -0.79203000 | 0.25385200  |
| Si | 1.88436000  | -1.40416000 | -0.20605500 |
| C  | 1.61808800  | -2.94245200 | 0.92833900  |
| H  | 2.48765000  | -3.60556400 | 0.92777800  |
| H  | 1.41844300  | -2.66020300 | 1.96619700  |
| H  | 0.75906400  | -3.52674100 | 0.58964900  |

### TS<sub>3</sub>

0 2

|    |             |             |             |
|----|-------------|-------------|-------------|
| Fe | 0.34891300  | 0.14371600  | 0.00329100  |
| N  | 0.33075600  | 0.54042500  | 1.90144400  |
| C  | 1.52137700  | 0.68915200  | 2.74011300  |
| C  | -0.68732000 | 0.32309800  | 2.68686200  |
| C  | 0.95407800  | 0.78961700  | 4.15043800  |
| H  | 2.16907900  | -0.18386000 | 2.59871200  |
| H  | 1.43905300  | 0.14580500  | 4.88461500  |
| N  | -1.60510800 | 0.12885300  | -0.07627000 |
| C  | -2.49080700 | 0.04597300  | 0.95599200  |
| C  | -3.46057500 | 0.09075500  | -1.65352100 |
| C  | -3.89813500 | -0.08295900 | 0.71331900  |

|    |             |             |             |
|----|-------------|-------------|-------------|
| C  | -4.35291800 | -0.05853900 | -0.63829000 |
| H  | -3.79798700 | 0.11787700  | -2.68320500 |
| H  | -5.41647500 | -0.15106100 | -0.83260900 |
| C  | -2.05516600 | 0.07636000  | 2.31903600  |
| C  | -4.78627700 | -0.23317500 | 1.78294200  |
| C  | -4.33898300 | -0.24241100 | 3.09666500  |
| H  | -5.03969500 | -0.36156500 | 3.91522300  |
| C  | -2.99079500 | -0.07738500 | 3.35697900  |
| H  | -2.63059600 | -0.05104800 | 4.37734800  |
| H  | -5.84399900 | -0.34209800 | 1.56043100  |
| O  | -0.41209000 | 0.34920600  | 4.00948900  |
| C  | -2.07653700 | 0.18137100  | -1.38009000 |
| C  | -1.07972400 | 0.28584200  | -2.36965700 |
| C  | 1.28705700  | 0.29727800  | -2.77866700 |
| C  | 1.43546500  | -0.74572100 | -3.69970100 |
| C  | 2.29397500  | 1.26240900  | -2.68394700 |
| C  | 2.56348600  | -0.81734400 | -4.50814900 |
| C  | 3.41202400  | 1.19402600  | -3.50277500 |
| C  | 3.55455200  | 0.15416100  | -4.41766800 |
| H  | 2.66990100  | -1.64087100 | -5.20720100 |
| H  | 4.18174900  | 1.95500900  | -3.42193200 |
| H  | 4.43407500  | 0.09780700  | -5.05020800 |
| H  | 0.66894200  | -1.51206100 | -3.76400500 |
| H  | 2.17765600  | 2.05400400  | -1.95207400 |
| H  | 2.09082400  | 1.56862300  | 2.43634100  |
| H  | 0.93560200  | 1.81424300  | 4.53469100  |
| N  | 0.18120500  | 0.36616600  | -1.89872900 |
| C  | -1.42200300 | 0.34189300  | -3.82551700 |
| H  | -0.62232500 | 0.80855700  | -4.40122500 |
| H  | -1.59414800 | -0.65077500 | -4.25827400 |
| H  | -2.33209700 | 0.92271000  | -3.98800600 |
| H  | 1.91300600  | -3.14105300 | -0.25080000 |
| H  | 0.39105600  | -2.58053100 | 1.48132800  |
| Si | 0.71884500  | -2.33042800 | 0.06205600  |
| C  | -0.69887200 | -2.92951900 | -1.05962800 |
| H  | -0.61375200 | -2.51408900 | -2.06596500 |
| H  | -0.69122000 | -4.01926900 | -1.14314600 |
| H  | -1.66402900 | -2.61745000 | -0.65732700 |
| H  | 1.77861400  | 0.67327100  | -0.02614000 |
| H  | 1.57495900  | -0.89933200 | -0.03406700 |

Imaginary Frequency: -432.50

## VI

0 2

|    |             |             |            |
|----|-------------|-------------|------------|
| Fe | -0.05526300 | -0.02788200 | 0.51689300 |
| N  | -0.10378300 | 0.21249900  | 2.44887600 |
| C  | 1.07767700  | 0.47288700  | 3.27576900 |
| C  | -1.15548600 | 0.28468200  | 3.21050400 |
| C  | 0.52213600  | 0.48056900  | 4.69547300 |
| H  | 1.82957600  | -0.29989800 | 3.10578700 |
| H  | 0.75106500  | -0.43343200 | 5.25226200 |



|    |             |             |             |
|----|-------------|-------------|-------------|
| N  | -2.07807500 | -0.10821500 | 0.45957500  |
| C  | -2.96608800 | -0.06810300 | 1.48477500  |
| C  | -3.89013100 | -0.48445000 | -1.10372200 |
| C  | -4.37210800 | -0.23659000 | 1.25126600  |
| C  | -4.80313400 | -0.43660700 | -0.08843900 |
| H  | -4.21592500 | -0.63977500 | -2.12543800 |
| H  | -5.86393500 | -0.55691700 | -0.28416200 |
| C  | -2.54090500 | 0.12085900  | 2.84039300  |
| C  | -5.27752400 | -0.21486000 | 2.32096200  |
| C  | -4.84377000 | -0.03659200 | 3.62457500  |
| H  | -5.55201200 | -0.02766600 | 4.44508300  |
| C  | -3.48991100 | 0.12914800  | 3.87417000  |
| H  | -3.13672300 | 0.26415900  | 4.88862600  |
| H  | -6.33354300 | -0.34759300 | 2.10301700  |
| O  | -0.90918500 | 0.53336200  | 4.51399300  |
| C  | -2.51814100 | -0.32661200 | -0.82773100 |
| C  | -1.50283300 | -0.38450700 | -1.83582800 |
| C  | 0.82470900  | -0.13382900 | -2.33014800 |
| C  | 1.96417700  | -0.92435400 | -2.15144600 |
| C  | 0.79493500  | 0.78083800  | -3.38886400 |
| C  | 3.03206500  | -0.82196000 | -3.02992700 |
| C  | 1.87495000  | 0.89023500  | -4.25633000 |
| C  | 2.99564300  | 0.08509800  | -4.08676100 |
| H  | 3.90608600  | -1.44853000 | -2.88298500 |
| H  | 1.84118200  | 1.61467400  | -5.06400500 |
| H  | 3.83866100  | 0.17103600  | -4.76404800 |
| H  | 1.99396000  | -1.60135300 | -1.30534200 |
| H  | -0.07164400 | 1.42373100  | -3.50858700 |
| H  | 1.52526300  | 1.42701100  | 2.97847700  |
| H  | 0.81337600  | 1.34380200  | 5.29456000  |
| N  | -0.24420000 | -0.23473400 | -1.41336800 |
| C  | -1.87366300 | -0.67391500 | -3.25753100 |
| H  | -2.28535900 | 0.20205400  | -3.77150500 |
| H  | -1.01057400 | -1.00915600 | -3.83109700 |
| H  | -2.63390900 | -1.45694500 | -3.30509600 |
| H  | -0.65149000 | -4.57580700 | 4.26289800  |
| H  | -1.06124200 | -2.24311000 | 4.50627800  |
| Si | -0.58174800 | -3.27798000 | 3.57405100  |
| C  | -1.62104300 | -3.29266600 | 1.99271500  |
| H  | -2.68971300 | -3.25966100 | 2.21756800  |
| H  | -1.38687100 | -2.42733500 | 1.36872900  |
| H  | -1.42739100 | -4.19081000 | 1.40330300  |
| H  | 1.50264400  | -0.00093400 | 0.48904300  |
| H  | 0.83058600  | -2.99404100 | 3.26266600  |

#### Quartet

I<sub>0</sub>

0 4

|    |             |             |             |
|----|-------------|-------------|-------------|
| Fe | -0.00309500 | -0.06838000 | -0.01520100 |
| N  | 0.01336800  | -0.07954800 | 1.91413300  |

|   |             |             |             |
|---|-------------|-------------|-------------|
| C | 1.20776700  | -0.15786500 | 2.75730700  |
| C | -1.03610100 | -0.10487600 | 2.69229600  |
| C | 0.66081100  | 0.04283400  | 4.16476200  |
| H | 1.68727800  | -1.13215500 | 2.61503200  |
| H | 1.01219300  | -0.68349500 | 4.89824600  |
| N | -1.99591300 | -0.09210600 | -0.07568900 |
| C | -2.87259400 | -0.12366900 | 0.96284300  |
| C | -3.85270300 | -0.16412700 | -1.64456000 |
| C | -4.28819500 | -0.16385500 | 0.73233900  |
| C | -4.74652900 | -0.18667700 | -0.61633300 |
| H | -4.19655300 | -0.17445800 | -2.67236500 |
| H | -5.81518000 | -0.22047600 | -0.80308300 |
| C | -2.42535300 | -0.11838100 | 2.32522500  |
| C | -5.18346400 | -0.18183100 | 1.80714700  |
| C | -4.73084000 | -0.16551400 | 3.12026600  |
| H | -5.43373100 | -0.17776300 | 3.94538500  |
| C | -3.37130400 | -0.13508200 | 3.36832100  |
| H | -3.00502300 | -0.12533900 | 4.38696400  |
| H | -6.24749600 | -0.20842600 | 1.58968400  |
| O | -0.76279100 | -0.13275900 | 4.01653100  |
| C | -2.46843500 | -0.10732400 | -1.37699100 |
| C | -1.47556700 | -0.03999500 | -2.38554700 |
| C | 0.85525900  | 0.27986900  | -2.83559200 |
| C | 2.00399400  | -0.51719000 | -2.78304200 |
| C | 0.81287500  | 1.34261500  | -3.74642100 |
| C | 3.06708100  | -0.27292500 | -3.63956300 |
| C | 1.88644800  | 1.59029600  | -4.59239300 |
| C | 3.01612300  | 0.78043900  | -4.54942300 |
| H | 3.94712800  | -0.90636600 | -3.59152300 |
| H | 1.84145900  | 2.42682700  | -5.28266500 |
| H | 3.85401100  | 0.97432900  | -5.21053500 |
| H | 2.04495400  | -1.31787100 | -2.05332400 |
| H | -0.05882100 | 1.98911400  | -3.76452700 |
| H | 1.93069800  | 0.60166800  | 2.45658800  |
| H | 0.83362200  | 1.05090700  | 4.55496800  |
| N | -0.21019000 | 0.03464000  | -1.94331600 |
| C | -1.84257700 | -0.11748100 | -3.83514500 |
| H | -0.99235100 | -0.43331100 | -4.43957500 |
| H | -2.65055300 | -0.83524200 | -3.99083300 |
| H | -2.18460200 | 0.84239900  | -4.23770600 |
| H | 1.55056100  | -0.14283900 | -0.01275200 |

## I

04

|    |             |             |             |
|----|-------------|-------------|-------------|
| Fe | 0.39513400  | -0.73952500 | 0.36558200  |
| N  | 0.14491400  | -0.10689700 | 2.18248500  |
| C  | 1.18454100  | 0.01872000  | 3.20570900  |
| C  | -1.00552900 | 0.16699400  | 2.73853100  |
| C  | 0.45716500  | 0.66117500  | 4.38111100  |
| H  | 1.58901100  | -0.97222000 | 3.43845000  |
| H  | 0.60432100  | 0.15593700  | 5.33655200  |
| N  | -1.57343400 | -0.86359200 | 0.05477300  |
| C  | -2.57739700 | -0.41793500 | 0.85387100  |
| C  | -3.20205200 | -1.49409000 | -1.63591200 |
| C  | -3.94439300 | -0.46614400 | 0.41997900  |

|   |             |             |             |
|---|-------------|-------------|-------------|
| C | -4.21992100 | -1.02596700 | -0.86039500 |
| H | -3.40588600 | -1.91399600 | -2.61399500 |
| H | -5.24987400 | -1.06969700 | -1.19998100 |
| C | -2.31921200 | 0.11587700  | 2.16014100  |
| C | -4.96896500 | 0.01971300  | 1.23922700  |
| C | -4.69649500 | 0.54839800  | 2.49518400  |
| H | -5.49847400 | 0.92342800  | 3.12071500  |
| C | -3.39071000 | 0.58615700  | 2.94547200  |
| H | -3.16523100 | 0.98362700  | 3.92686200  |
| H | -5.98936000 | -0.02851500 | 0.86955400  |
| O | -0.93759200 | 0.55053900  | 4.03486200  |
| C | -1.86812800 | -1.40331200 | -1.18366900 |
| C | -0.75182000 | -1.81228100 | -1.95501400 |
| C | 1.63745100  | -1.84363100 | -2.11771200 |
| C | 2.70087300  | -2.46440400 | -1.44856400 |
| C | 1.80654600  | -1.49667000 | -3.46390500 |
| C | 3.87631300  | -2.76491700 | -2.11915100 |
| C | 2.98839700  | -1.79436900 | -4.12986400 |
| C | 4.02653400  | -2.43881600 | -3.46597700 |
| H | 4.68230900  | -3.26023900 | -1.58666900 |
| H | 3.10327100  | -1.49588800 | -5.16785300 |
| H | 4.94637700  | -2.68081700 | -3.98943900 |
| H | 2.58198000  | -2.69970100 | -0.39703500 |
| H | 1.01908400  | -0.95461800 | -3.97583600 |
| H | 2.01416700  | 0.62051300  | 2.82942900  |
| H | 0.68844300  | 1.72382300  | 4.50397800  |
| N | 0.45019300  | -1.55597300 | -1.41366400 |
| C | -0.95435000 | -2.57232600 | -3.23068300 |
| H | -0.08794300 | -3.19230300 | -3.46063400 |
| H | -1.82403200 | -3.22705900 | -3.15154500 |
| H | -1.11897300 | -1.92051900 | -4.09570200 |
| C | -0.47370100 | 1.98001100  | -0.66834600 |
| H | 1.94161300  | -0.68364800 | 0.59286600  |
| C | 0.85436400  | 2.16574400  | -0.61324000 |
| C | 1.72133900  | 1.88674100  | -1.77583400 |
| C | 3.03048000  | 1.42186200  | -1.61554900 |
| C | 1.27628800  | 2.12387300  | -3.08564000 |
| C | 3.86638200  | 1.19755100  | -2.70238900 |
| H | 3.39850400  | 1.19163000  | -0.62083900 |
| C | 2.09737000  | 1.91290400  | -4.17762600 |
| H | 0.27571400  | 2.51698600  | -3.24015500 |
| C | 3.40137300  | 1.44607400  | -3.99300000 |
| H | 4.86115100  | 0.80320600  | -2.53461700 |
| H | 1.75710800  | 2.11259700  | -5.18813300 |
| C | 1.54926700  | 2.66358000  | 0.62982000  |
| H | 2.10659600  | 1.81633500  | 1.05470900  |
| C | 0.65735200  | 3.28166300  | 1.68969800  |
| H | 1.25006400  | 3.63318800  | 2.53857000  |
| H | 0.10583300  | 4.13946500  | 1.29480000  |
| H | -0.08089200 | 2.57331500  | 2.07332900  |
| O | 4.12860600  | 1.25132800  | -5.12688300 |
| C | 5.45910700  | 0.80387400  | -4.96666900 |
| H | 6.05720300  | 1.51726400  | -4.38688400 |
| H | 5.49696900  | -0.17538500 | -4.47415100 |
| H | 5.87434700  | 0.72047300  | -5.96992900 |

|   |             |            |             |
|---|-------------|------------|-------------|
| H | -1.12751100 | 2.21565000 | 0.16454600  |
| H | -0.95254300 | 1.57272900 | -1.55320400 |
| H | 2.31821900  | 3.38607800 | 0.32824300  |

**TS<sub>1</sub>**

0 4

|    |             |             |             |
|----|-------------|-------------|-------------|
| Fe | 0.08324200  | 0.22642800  | 0.09391500  |
| N  | 0.09032300  | -0.17177400 | 2.06718500  |
| C  | 1.22305100  | -0.33052200 | 2.97504000  |
| C  | -0.99906000 | -0.12554100 | 2.78754400  |
| C  | 0.61792100  | -0.06205400 | 4.34808100  |
| H  | 1.63617300  | -1.34278800 | 2.88280400  |
| H  | 0.88589200  | -0.78776100 | 5.11619500  |
| N  | -1.74624400 | -0.47742000 | 0.03026700  |
| C  | -2.70292200 | -0.33267700 | 0.97128500  |
| C  | -3.41912000 | -1.11516700 | -1.59497400 |
| C  | -4.09179500 | -0.47029400 | 0.63910400  |
| C  | -4.41311100 | -0.83316500 | -0.70275400 |
| H  | -3.66619100 | -1.43347900 | -2.60153100 |
| H  | -5.45746300 | -0.91422100 | -0.98652800 |
| C  | -2.35930100 | -0.06607300 | 2.33713100  |
| C  | -5.06368300 | -0.25053300 | 1.61848500  |
| C  | -4.71362300 | 0.06387300  | 2.93116300  |
| H  | -5.48366200 | 0.23452000  | 3.67506000  |
| C  | -3.38097300 | 0.13454900  | 3.28704800  |
| H  | -3.09638000 | 0.33530900  | 4.31273100  |
| H  | -6.10935000 | -0.33418800 | 1.33551000  |
| O  | -0.80320200 | -0.15743800 | 4.12619700  |
| C  | -2.06284200 | -0.97759500 | -1.22363100 |
| C  | -0.95346800 | -1.37775500 | -2.01827200 |
| C  | 1.45845500  | -1.55828300 | -2.03825300 |
| C  | 2.43721900  | -1.99874900 | -1.12792100 |
| C  | 1.79551800  | -1.52901800 | -3.40172300 |
| C  | 3.67426500  | -2.44216800 | -1.56609800 |
| C  | 3.04079600  | -1.96762500 | -3.83300900 |
| C  | 3.98438300  | -2.43878600 | -2.92536400 |
| H  | 4.40297400  | -2.79656500 | -0.84308700 |
| H  | 3.28138000  | -1.91761500 | -4.89159600 |
| H  | 4.95150200  | -2.79122000 | -3.26976100 |
| H  | 2.18855000  | -1.99662100 | -0.06917700 |
| H  | 1.09293400  | -1.11996400 | -4.11834000 |
| H  | 2.02154100  | 0.37003000  | 2.71229000  |
| H  | 0.83347400  | 0.94529800  | 4.72082100  |
| N  | 0.25187500  | -1.10244400 | -1.50897300 |
| C  | -1.17086200 | -2.16177800 | -3.27600400 |
| H  | -0.37598700 | -2.89729700 | -3.41354300 |
| H  | -2.12067200 | -2.69588800 | -3.25146600 |
| H  | -1.17280600 | -1.52807100 | -4.17033800 |
| C  | -0.41144400 | 1.84105000  | -1.02979100 |
| H  | 1.49653000  | 0.84183700  | 0.21691800  |
| C  | 0.97914500  | 2.01872500  | -0.80748800 |
| C  | 1.92205200  | 1.75310200  | -1.93912500 |
| C  | 3.21535000  | 1.28242300  | -1.71353500 |
| C  | 1.55525200  | 2.02671900  | -3.26111500 |

|   |             |             |             |
|---|-------------|-------------|-------------|
| C | 4.10968800  | 1.06337200  | -2.75152800 |
| H | 3.51781100  | 1.03472100  | -0.69853100 |
| C | 2.43266700  | 1.81480500  | -4.31220400 |
| H | 0.56452000  | 2.41987100  | -3.46822800 |
| C | 3.71235400  | 1.31744900  | -4.06529300 |
| H | 5.08859300  | 0.65472500  | -2.53329100 |
| H | 2.14451700  | 2.01801400  | -5.33793800 |
| C | 1.44562500  | 3.12803500  | 0.13273700  |
| H | 2.49654600  | 2.95102700  | 0.39046800  |
| C | 0.63083500  | 3.29908800  | 1.40072900  |
| H | 1.04643700  | 4.09035200  | 2.02888900  |
| H | -0.40932100 | 3.56475700  | 1.19523500  |
| H | 0.62070700  | 2.37523300  | 1.98755200  |
| O | 4.48702500  | 1.08973800  | -5.16120700 |
| C | 5.77381000  | 0.55352900  | -4.93661400 |
| H | 6.39708800  | 1.23060100  | -4.33971000 |
| H | 5.72093900  | -0.41879000 | -4.43124600 |
| H | 6.22574600  | 0.42591800  | -5.91906200 |
| H | -1.13320800 | 2.42484300  | -0.46307500 |
| H | -0.77257400 | 1.45992000  | -1.98074600 |
| H | 1.44006200  | 4.06061000  | -0.44801700 |

Imaginary frequency: -627.02

## II

04

|    |             |             |             |
|----|-------------|-------------|-------------|
| Fe | 0.03945000  | -0.05409300 | -0.01713700 |
| N  | 0.01698000  | -0.16596900 | 1.93270100  |
| C  | 1.17380600  | -0.20026600 | 2.83449600  |
| C  | -1.06217700 | -0.09873100 | 2.67552000  |
| C  | 0.58556100  | 0.24630100  | 4.16096900  |
| H  | 1.57471900  | -1.22052000 | 2.87229700  |
| H  | 0.92134300  | -0.31975900 | 5.02945400  |
| N  | -1.90075400 | -0.53909100 | -0.08465500 |
| C  | -2.81641200 | -0.44307500 | 0.91018100  |
| C  | -3.67640900 | -1.07068400 | -1.66468800 |
| C  | -4.21932500 | -0.61281200 | 0.64624400  |
| C  | -4.61228900 | -0.93804200 | -0.68727700 |
| H  | -3.97287400 | -1.31223400 | -2.67904900 |
| H  | -5.66765600 | -1.07773300 | -0.89853800 |
| C  | -2.43020600 | -0.16982700 | 2.26577200  |
| C  | -5.15381400 | -0.46388500 | 1.67122100  |
| C  | -4.76108900 | -0.15814900 | 2.97275900  |
| H  | -5.50162900 | -0.03915600 | 3.75550600  |
| C  | -3.42043500 | -0.02243300 | 3.26180300  |
| H  | -3.09753900 | 0.19170600  | 4.27265200  |
| H  | -6.20534100 | -0.59373900 | 1.43082500  |
| O  | -0.82917900 | 0.01798400  | 4.00271000  |
| C  | -2.30802600 | -0.86302400 | -1.37389700 |
| C  | -1.27510800 | -0.93415300 | -2.32493100 |
| C  | 1.08832300  | -0.63752700 | -2.68848900 |
| C  | 2.23226300  | -1.36552100 | -2.34537000 |
| C  | 1.13670800  | 0.20916100  | -3.80217300 |
| C  | 3.38869300  | -1.26156900 | -3.10527600 |
| C  | 2.29763500  | 0.31193800  | -4.55823900 |
| C  | 3.42803400  | -0.42368200 | -4.21654300 |

|   |             |             |             |
|---|-------------|-------------|-------------|
| H | 4.26680900  | -1.83521000 | -2.82626800 |
| H | 2.32226900  | 0.98038900  | -5.41322600 |
| H | 4.33435700  | -0.33908000 | -4.80637600 |
| H | 2.19638200  | -2.00342800 | -1.46700500 |
| H | 0.26564000  | 0.80865600  | -4.04904300 |
| H | 1.97124800  | 0.45611000  | 2.48122900  |
| H | 0.73508300  | 1.31560900  | 4.34972700  |
| N | -0.03674500 | -0.69253300 | -1.84177000 |
| C | -1.53059000 | -1.32421700 | -3.74635500 |
| H | -0.64906600 | -1.79170700 | -4.18775500 |
| H | -2.35497900 | -2.03571800 | -3.81490400 |
| H | -1.78931700 | -0.46939800 | -4.38171100 |
| C | 1.72929800  | 1.02974000  | -0.10079700 |
| H | 1.04027900  | 2.23112000  | 1.56388900  |
| C | 1.61953300  | 2.36941700  | 0.63469600  |
| C | 2.96168900  | 2.93157000  | 1.04961900  |
| C | 3.18429000  | 3.39028800  | 2.34434000  |
| C | 4.02554800  | 3.02215200  | 0.14142100  |
| C | 4.41076400  | 3.92309300  | 2.74267600  |
| H | 2.37360300  | 3.33804700  | 3.06919000  |
| C | 5.24814700  | 3.55034700  | 0.51255200  |
| H | 3.88923000  | 2.66016000  | -0.87459700 |
| C | 5.45067600  | 4.00545800  | 1.81951100  |
| H | 4.54051900  | 4.26655100  | 3.76203300  |
| H | 6.07160800  | 3.62036200  | -0.19003100 |
| C | 0.83793300  | 3.39394200  | -0.20281700 |
| H | 0.76534200  | 4.33085800  | 0.36270300  |
| C | -0.55214200 | 2.92450400  | -0.60098100 |
| H | -1.13886100 | 3.72888300  | -1.05254300 |
| H | -0.51506700 | 2.11199000  | -1.33668400 |
| H | -1.11790800 | 2.56346600  | 0.26791400  |
| O | 6.69003800  | 4.50374600  | 2.08932500  |
| C | 6.92057300  | 4.97442100  | 3.39799100  |
| H | 6.24847600  | 5.80210300  | 3.65679400  |
| H | 6.80231000  | 4.17807700  | 4.14355500  |
| H | 7.94925300  | 5.33087000  | 3.41748400  |
| H | 1.98969300  | 1.20370700  | -1.15362000 |
| H | 2.53011700  | 0.40402000  | 0.32031600  |
| H | 1.42136600  | 3.63151700  | -1.10270200 |

### III

04

|    |             |             |             |
|----|-------------|-------------|-------------|
| Fe | 0.29474300  | -0.13567100 | -0.21658700 |
| N  | 0.12758100  | 0.13800800  | 1.71134600  |
| C  | 1.19665400  | 0.44592900  | 2.66455000  |
| C  | -0.95164300 | -0.14723300 | 2.40400900  |
| C  | 0.64648800  | -0.07737800 | 3.98043300  |
| H  | 2.13043600  | -0.03708500 | 2.37160100  |
| H  | 1.01390300  | -1.08186600 | 4.22164400  |
| N  | -1.69264100 | -0.08347100 | -0.41182200 |
| C  | -2.62176600 | -0.33058600 | 0.54023300  |
| C  | -3.43130100 | -0.10532600 | -2.11483200 |
| C  | -4.00048700 | -0.54489900 | 0.19354900  |
| C  | -4.36878600 | -0.41105400 | -1.17967700 |
| H  | -3.70993000 | -0.00296500 | -3.15814800 |

|   |             |             |             |
|---|-------------|-------------|-------------|
| H | -5.40841400 | -0.55989200 | -1.45500100 |
| C | -2.27049300 | -0.41439200 | 1.92990700  |
| C | -4.93047300 | -0.88252400 | 1.17481800  |
| C | -4.56003400 | -1.00499900 | 2.51393400  |
| H | -5.29558500 | -1.27493600 | 3.26337300  |
| C | -3.25421100 | -0.76445100 | 2.88166200  |
| H | -2.95645700 | -0.83496100 | 3.92013500  |
| H | -5.96004300 | -1.05152900 | 0.87197000  |
| O | -0.77101500 | -0.16813400 | 3.74672000  |
| C | -2.07352600 | 0.04517000  | -1.74177500 |
| C | -1.02456500 | 0.27633000  | -2.64420400 |
| C | 1.37361600  | 0.49117000  | -2.85319100 |
| C | 1.65415500  | -0.35545600 | -3.93414700 |
| C | 2.34787500  | 1.41716200  | -2.45972200 |
| C | 2.86506300  | -0.26131800 | -4.60971000 |
| C | 3.55336600  | 1.50909700  | -3.13869500 |
| C | 3.81922500  | 0.67248400  | -4.22042400 |
| H | 3.06729600  | -0.93089600 | -5.44001900 |
| H | 4.29294900  | 2.23744400  | -2.82125100 |
| H | 4.76404600  | 0.74259200  | -4.74840800 |
| H | 0.92422000  | -1.10529700 | -4.22415000 |
| H | 2.13689200  | 2.05574300  | -1.60646600 |
| H | 1.37344600  | 1.52848400  | 2.68217200  |
| H | 0.80511400  | 0.57501400  | 4.83899900  |
| N | 0.20387400  | 0.37474800  | -2.08240400 |
| C | -1.27684300 | 0.46521400  | -4.10700200 |
| H | -0.48231600 | 1.04859100  | -4.57402100 |
| H | -1.34031600 | -0.48442500 | -4.65370800 |
| H | -2.21758400 | 0.99291500  | -4.27476200 |
| C | 2.09668300  | -1.03778200 | -0.13046300 |
| H | 2.47029700  | -1.17828700 | -1.15365300 |
| H | 2.86372600  | -0.47901400 | 0.42065500  |
| C | 1.77057000  | -2.39119300 | 0.50924100  |
| H | 1.66681300  | -2.25686300 | 1.59869200  |
| C | 2.85714800  | -3.45097600 | 0.27799800  |
| H | 2.96446000  | -3.60609700 | -0.80390400 |
| H | 3.81717500  | -3.03998100 | 0.61423500  |
| C | 2.57791700  | -4.77356600 | 0.97042900  |
| H | 3.38056600  | -5.49694100 | 0.80661300  |
| H | 2.47209000  | -4.64024900 | 2.05246900  |
| H | 1.64845200  | -5.22350000 | 0.60901700  |
| C | 0.40937000  | -2.83959000 | 0.00036900  |
| C | -0.63909900 | -3.17988400 | 0.86337100  |
| C | 0.14411100  | -2.86078400 | -1.37384200 |
| C | -1.89993500 | -3.49537500 | 0.38491800  |
| H | -0.46494700 | -3.16913800 | 1.93815500  |
| C | -1.11326500 | -3.17972800 | -1.87575200 |
| H | 0.93753200  | -2.59907400 | -2.07049400 |
| C | -2.14972100 | -3.48307200 | -0.98980300 |
| H | -2.72051200 | -3.71997100 | 1.05830200  |
| H | -1.28019800 | -3.16564000 | -2.94679500 |
| O | -3.42474300 | -3.77025000 | -1.36474800 |
| C | -3.71033700 | -3.73474000 | -2.74617400 |
| H | -3.13510100 | -4.48835300 | -3.29828700 |
| H | -4.77269900 | -3.95412900 | -2.84260100 |

|                       |             |             |             |
|-----------------------|-------------|-------------|-------------|
| H                     | -3.50683700 | -2.74432600 | -3.17286800 |
| <b>TS<sub>2</sub></b> |             |             |             |
| 04                    |             |             |             |
| Fe                    | 0.31465600  | 0.18007600  | -0.10290100 |
| N                     | 0.14510500  | 0.10597900  | 2.01096300  |
| C                     | 1.31187300  | 0.21390800  | 2.88586500  |
| C                     | -0.90519500 | 0.05619200  | 2.76124200  |
| C                     | 0.75501800  | -0.16319600 | 4.25010200  |
| H                     | 2.11172000  | -0.44881200 | 2.54620800  |
| H                     | 0.93740500  | -1.21282500 | 4.50887800  |
| N                     | -1.85721600 | 0.30164500  | -0.04535800 |
| C                     | -2.72741400 | 0.21723400  | 0.99964800  |
| C                     | -3.74665600 | 0.67271500  | -1.54192300 |
| C                     | -4.14882600 | 0.27561700  | 0.79344700  |
| C                     | -4.62790500 | 0.52267300  | -0.52108300 |
| H                     | -4.09716300 | 0.87094800  | -2.54787500 |
| H                     | -5.69932800 | 0.59032400  | -0.68313200 |
| C                     | -2.29240400 | 0.05381400  | 2.35960200  |
| C                     | -5.04633400 | 0.10147700  | 1.85304700  |
| C                     | -4.59869700 | -0.10583300 | 3.14459800  |
| H                     | -5.29762600 | -0.24541200 | 3.96109000  |
| C                     | -3.23348600 | -0.11182200 | 3.38462100  |
| H                     | -2.86490200 | -0.24543200 | 4.39330400  |
| H                     | -6.10975700 | 0.13802500  | 1.63340400  |
| O                     | -0.66816700 | 0.01120300  | 4.09713200  |
| C                     | -2.35690700 | 0.52261400  | -1.30699000 |
| C                     | -1.43240900 | 0.55415600  | -2.38393200 |
| C                     | 0.81052000  | 0.06396300  | -3.05230400 |
| C                     | 0.58788100  | -0.91528200 | -4.03463800 |
| C                     | 2.06529000  | 0.68566400  | -2.99800200 |
| C                     | 1.59116700  | -1.26156100 | -4.92813600 |
| C                     | 3.06150100  | 0.33566600  | -3.90007300 |
| C                     | 2.83492000  | -0.63837700 | -4.86722600 |
| H                     | 1.40217500  | -2.02787900 | -5.67349300 |
| H                     | 4.02527900  | 0.83212400  | -3.84591600 |
| H                     | 3.61770700  | -0.90950500 | -5.56734500 |
| H                     | -0.37579300 | -1.41509400 | -4.06993700 |
| H                     | 2.23611400  | 1.44726500  | -2.24611000 |
| H                     | 1.69597200  | 1.24011600  | 2.84651900  |
| H                     | 1.08493500  | 0.46959100  | 5.07368500  |
| N                     | -0.15250100 | 0.33306400  | -2.06927100 |
| C                     | -1.88998900 | 0.89016900  | -3.77303800 |
| H                     | -1.04273900 | 1.10634600  | -4.42296900 |
| H                     | -2.45637100 | 0.07464100  | -4.23980500 |
| H                     | -2.54071200 | 1.76917100  | -3.77193500 |
| C                     | 1.87318100  | -1.30324000 | -0.10404800 |
| H                     | 1.95977900  | -1.47084800 | -1.18534800 |
| H                     | 2.89727800  | -1.19173200 | 0.26628900  |
| C                     | 1.21714900  | -2.51075100 | 0.58660400  |
| H                     | 1.22582600  | -2.34041200 | 1.67460000  |
| C                     | 2.04057000  | -3.78587600 | 0.32452900  |
| H                     | 2.03796600  | -3.98500100 | -0.75527400 |
| H                     | 3.08618600  | -3.58420400 | 0.58865900  |
| C                     | 1.53815600  | -5.00379800 | 1.08053500  |



|    |             |             |             |
|----|-------------|-------------|-------------|
| H  | 2.16724700  | -5.87883700 | 0.89929000  |
| H  | 1.52922800  | -4.82384300 | 2.16095200  |
| H  | 0.51695100  | -5.26276800 | 0.78741100  |
| C  | -0.23161400 | -2.69308300 | 0.18606500  |
| C  | -1.23925700 | -2.87957400 | 1.13634600  |
| C  | -0.60922300 | -2.67593200 | -1.15737100 |
| C  | -2.57067900 | -2.99675100 | 0.77084400  |
| H  | -0.97379800 | -2.90728900 | 2.19213400  |
| C  | -1.93896500 | -2.79126400 | -1.54823200 |
| H  | 0.15170900  | -2.54826400 | -1.92363800 |
| C  | -2.93167300 | -2.92873200 | -0.57580500 |
| H  | -3.35452100 | -3.10356100 | 1.51361800  |
| H  | -2.19211600 | -2.75078200 | -2.60177000 |
| O  | -4.26664100 | -2.99578500 | -0.83984700 |
| C  | -4.65758300 | -2.88184500 | -2.18985000 |
| H  | -4.26588500 | -3.70643900 | -2.79840200 |
| H  | -5.74611400 | -2.91947100 | -2.19641700 |
| H  | -4.32730700 | -1.92915600 | -2.62486900 |
| Si | 0.80512600  | 2.58430900  | 0.06327200  |
| H  | 1.85768100  | 0.40656300  | -0.05133700 |
| H  | 1.82631000  | 3.15617000  | -0.84618800 |
| C  | -0.83783700 | 3.50438100  | -0.28549300 |
| H  | -1.58842000 | 3.25477300  | 0.46843700  |
| H  | -0.70213000 | 4.58964700  | -0.28859000 |
| H  | -1.24408200 | 3.21542700  | -1.25888200 |
| H  | 1.24344800  | 2.95686500  | 1.43294200  |

Imaginary frequency: -807.21

#### IV

04

|    |             |             |             |
|----|-------------|-------------|-------------|
| Fe | -0.48981000 | 0.36054600  | -0.18495200 |
| N  | -0.51105900 | -0.21433700 | 1.67683100  |
| C  | 0.62695000  | -0.30346500 | 2.59468400  |
| C  | -1.60125500 | -0.45685400 | 2.36072400  |
| C  | 0.03068800  | -0.96807900 | 3.82541700  |
| H  | 1.43427100  | -0.88775700 | 2.14631100  |
| H  | 0.24792200  | -2.04000600 | 3.87855500  |
| N  | -2.48932500 | 0.40847300  | -0.29794700 |
| C  | -3.39172100 | 0.08444200  | 0.65828700  |
| C  | -4.29145900 | 1.07465900  | -1.79194900 |
| C  | -4.79980900 | 0.20098600  | 0.40950800  |
| C  | -5.21270200 | 0.74235200  | -0.84858000 |
| H  | -4.59934300 | 1.47808000  | -2.75083900 |
| H  | -6.27463000 | 0.87491000  | -1.03171000 |
| C  | -2.97711700 | -0.38234100 | 1.94891500  |
| C  | -5.72161700 | -0.20705100 | 1.37440100  |
| C  | -5.30318800 | -0.71158600 | 2.60160200  |
| H  | -6.02889200 | -1.03606000 | 3.33852600  |
| C  | -3.95268900 | -0.78329100 | 2.88263000  |
| H  | -3.61831300 | -1.15429100 | 3.84293500  |
| H  | -6.78078800 | -0.12344500 | 1.14577600  |
| O  | -1.38942200 | -0.81438800 | 3.64838100  |
| C  | -2.91184400 | 0.85826900  | -1.54114300 |
| C  | -1.89832300 | 1.02589900  | -2.49290000 |
| C  | 0.37138800  | 0.39571300  | -2.98350100 |

|    |             |             |             |
|----|-------------|-------------|-------------|
| C  | 0.11145100  | -0.35637200 | -4.14459600 |
| C  | 1.70352500  | 0.73702000  | -2.70428200 |
| C  | 1.14348600  | -0.74483300 | -4.98581700 |
| C  | 2.72889600  | 0.34885600  | -3.55455100 |
| C  | 2.46077800  | -0.39513900 | -4.70040500 |
| H  | 0.91733200  | -1.33806600 | -5.86653500 |
| H  | 3.75013900  | 0.62977100  | -3.31553900 |
| H  | 3.26580200  | -0.70020400 | -5.35992600 |
| H  | -0.90760300 | -0.66484700 | -4.35549800 |
| H  | 1.91928300  | 1.30923700  | -1.80852300 |
| H  | 1.01784500  | 0.70163300  | 2.79875600  |
| H  | 0.30346300  | -0.50044600 | 4.77178800  |
| N  | -0.64772200 | 0.68866200  | -2.06947700 |
| C  | -2.16943900 | 1.62735700  | -3.83851800 |
| H  | -1.24406700 | 1.95742100  | -4.31167500 |
| H  | -2.65668600 | 0.93480800  | -4.53473100 |
| H  | -2.82433000 | 2.49848700  | -3.74839700 |
| C  | 3.10613700  | -1.52617100 | -0.18565300 |
| H  | 3.02293600  | -1.44723700 | -1.27368900 |
| H  | 4.16903200  | -1.45483900 | 0.06154400  |
| C  | 2.51553000  | -2.83952500 | 0.32170100  |
| H  | 2.75879600  | -2.93847300 | 1.39187400  |
| C  | 3.17143800  | -4.02596400 | -0.40311600 |
| H  | 2.93245000  | -3.94923400 | -1.47256000 |
| H  | 4.26080500  | -3.91444500 | -0.33197600 |
| C  | 2.75609900  | -5.38635000 | 0.12535800  |
| H  | 3.27389400  | -6.19443000 | -0.39634000 |
| H  | 2.98531100  | -5.48560300 | 1.19168000  |
| H  | 1.68179100  | -5.55245800 | 0.00715800  |
| C  | 1.00777200  | -2.88239800 | 0.20827100  |
| C  | 0.22036300  | -3.41495800 | 1.23519900  |
| C  | 0.34739000  | -2.42090900 | -0.93030900 |
| C  | -1.16098200 | -3.47590400 | 1.14272600  |
| H  | 0.71020000  | -3.79647700 | 2.12948000  |
| C  | -1.04299400 | -2.47217000 | -1.04635900 |
| H  | 0.91900500  | -2.00889200 | -1.75959100 |
| C  | -1.80668100 | -3.00217800 | -0.00337900 |
| H  | -1.76740200 | -3.87824000 | 1.94824800  |
| H  | -1.51469300 | -2.08965600 | -1.94464500 |
| O  | -3.16037500 | -3.09392900 | -0.00787800 |
| C  | -3.83021400 | -2.74301600 | -1.20460500 |
| H  | -3.52613300 | -3.39343400 | -2.03403600 |
| H  | -4.89199200 | -2.87890800 | -1.00509800 |
| H  | -3.65073000 | -1.69890200 | -1.48337600 |
| Si | 0.63572700  | 2.45671600  | 0.32791100  |
| H  | 2.60051700  | -0.65060900 | 0.23590700  |
| H  | 0.75146600  | 3.41728500  | -0.79275100 |
| C  | -0.42903800 | 3.25671200  | 1.70717400  |
| H  | -0.43689000 | 2.63839900  | 2.60882600  |
| H  | -0.06558600 | 4.24969300  | 1.98509700  |
| H  | -1.46648800 | 3.35825600  | 1.37922300  |
| H  | 2.01447200  | 2.28492000  | 0.86393900  |

|    |             |             |             |
|----|-------------|-------------|-------------|
| Fe | -0.02047400 | 0.03516900  | -0.02909100 |
| N  | -0.00500600 | -0.04136300 | 1.91735800  |
| C  | 1.16535800  | -0.08053900 | 2.80517300  |
| C  | -1.06652000 | 0.06039500  | 2.67970700  |
| C  | 0.55875100  | -0.41030500 | 4.15454300  |
| H  | 1.89285600  | -0.81928100 | 2.47081700  |
| H  | 0.58275800  | -1.48298100 | 4.37792500  |
| N  | -1.95246800 | 0.55673000  | -0.06788400 |
| C  | -2.84521900 | 0.53431700  | 0.95572400  |
| C  | -3.74398700 | 1.11431600  | -1.61507500 |
| C  | -4.24011500 | 0.78292600  | 0.72557300  |
| C  | -4.65671600 | 1.07624800  | -0.60458100 |
| H  | -4.05835000 | 1.32475500  | -2.63058800 |
| H  | -5.70893000 | 1.26496000  | -0.79177500 |
| C  | -2.43622400 | 0.26655300  | 2.30321600  |
| C  | -5.15371000 | 0.73873300  | 1.78337500  |
| C  | -4.74027100 | 0.45991400  | 3.08025500  |
| H  | -5.45838900 | 0.42418300  | 3.89141400  |
| C  | -3.40088200 | 0.23235400  | 3.33032100  |
| H  | -3.06391500 | 0.02320900  | 4.33740000  |
| H  | -6.20099900 | 0.92914100  | 1.56651000  |
| O  | -0.82074500 | -0.01912100 | 4.00712400  |
| C  | -2.38360000 | 0.84923000  | -1.35065900 |
| C  | -1.37485400 | 0.84059800  | -2.34417100 |
| C  | 0.95309600  | 0.47771300  | -2.79671200 |
| C  | 0.95798500  | -0.31615000 | -3.94614500 |
| C  | 2.10156500  | 1.20482000  | -2.46995800 |
| C  | 2.08725900  | -0.37389600 | -4.75369000 |
| C  | 3.22472200  | 1.14808100  | -3.28254500 |
| C  | 3.22352900  | 0.35890100  | -4.42943400 |
| H  | 2.08147700  | -1.00606100 | -5.63595600 |
| H  | 4.10831900  | 1.71859800  | -3.01530400 |
| H  | 4.10522300  | 0.30769200  | -5.05896300 |
| H  | 0.08336400  | -0.91376500 | -4.18196600 |
| H  | 2.09985500  | 1.80352200  | -1.56336600 |
| H  | 1.66115400  | 0.89778600  | 2.78921000  |
| H  | 0.97568800  | 0.14063000  | 4.99696900  |
| N  | -0.14926700 | 0.50924800  | -1.91084900 |
| C  | -1.66704400 | 1.24299500  | -3.75508700 |
| H  | -0.78024600 | 1.65599900  | -4.23678300 |
| H  | -2.00063600 | 0.40025100  | -4.37104700 |
| H  | -2.45156700 | 1.99981800  | -3.79140300 |
| H  | 2.37475600  | -1.77504300 | -1.57199600 |
| H  | 3.20337000  | -0.71395200 | 0.36615000  |
| Si | 1.98547500  | -1.36588200 | -0.19959500 |
| C  | 1.75955800  | -3.01135600 | 0.78498900  |
| H  | 2.69204800  | -3.57857200 | 0.85338100  |
| H  | 1.39314800  | -2.84935800 | 1.80285700  |
| H  | 1.02542000  | -3.64912600 | 0.28652200  |

**TS<sub>3</sub>**

04

|    |            |             |            |
|----|------------|-------------|------------|
| Fe | 0.39351100 | -0.07314800 | 0.10297000 |
| N  | 0.39329600 | 0.54720000  | 2.00116400 |
| C  | 1.52218500 | 1.00533600  | 2.80715800 |

|    |             |             |             |
|----|-------------|-------------|-------------|
| C  | -0.66745600 | 0.54701800  | 2.75567200  |
| C  | 0.96671200  | 1.02161500  | 4.22745300  |
| H  | 2.37195800  | 0.32876900  | 2.68638600  |
| H  | 1.30277300  | 0.17339800  | 4.83197100  |
| N  | -1.57701800 | 0.05138500  | 0.00478500  |
| C  | -2.45393600 | 0.04156500  | 1.04109800  |
| C  | -3.41647300 | -0.13462900 | -1.56285100 |
| C  | -3.85923100 | -0.14300800 | 0.81151400  |
| C  | -4.30621400 | -0.25281800 | -0.53434900 |
| H  | -3.75652500 | -0.19243600 | -2.59004800 |
| H  | -5.36340800 | -0.40887300 | -0.72321400 |
| C  | -2.02577400 | 0.22823600  | 2.39742800  |
| C  | -4.75195800 | -0.20722300 | 1.88710300  |
| C  | -4.31172900 | -0.06525900 | 3.19636800  |
| H  | -5.01147700 | -0.12115000 | 4.02223000  |
| C  | -2.96935800 | 0.16346000  | 3.43877400  |
| H  | -2.61735200 | 0.30274500  | 4.45295400  |
| H  | -5.80416300 | -0.37056800 | 1.67220600  |
| O  | -0.45767000 | 0.89730200  | 4.04577800  |
| C  | -2.04341600 | 0.03204800  | -1.29597500 |
| C  | -1.06335600 | 0.16918900  | -2.32872000 |
| C  | 1.28675100  | 0.25674500  | -2.81874300 |
| C  | 1.40148700  | -0.59251800 | -3.93084200 |
| C  | 2.35863000  | 1.11274400  | -2.52257100 |
| C  | 2.54023400  | -0.56551000 | -4.72585700 |
| C  | 3.48447700  | 1.14499400  | -3.32966300 |
| C  | 3.58447200  | 0.30670300  | -4.43856500 |
| H  | 2.61327100  | -1.24019000 | -5.57317400 |
| H  | 4.29572200  | 1.82452400  | -3.08788300 |
| H  | 4.47151800  | 0.32501800  | -5.06225400 |
| H  | 0.60530400  | -1.29552200 | -4.15098400 |
| H  | 2.28174300  | 1.74816100  | -1.64516300 |
| H  | 1.84433100  | 1.99476500  | 2.46260100  |
| H  | 1.15392900  | 1.94353500  | 4.77883300  |
| N  | 0.20301700  | 0.21239500  | -1.93553000 |
| C  | -1.50249600 | 0.29816500  | -3.75523600 |
| H  | -0.72485200 | 0.75710500  | -4.36507700 |
| H  | -1.73540600 | -0.67570200 | -4.20205000 |
| H  | -2.40177700 | 0.91148700  | -3.83327200 |
| H  | 1.61615800  | -3.47068000 | -0.02505100 |
| H  | -0.32171700 | -2.88140200 | 1.18746800  |
| Si | 0.43247000  | -2.58171300 | -0.05576000 |
| C  | -0.62491300 | -3.10394300 | -1.55875100 |
| H  | -0.14116200 | -2.81701800 | -2.49504600 |
| H  | -0.76917800 | -4.18729100 | -1.57604300 |
| H  | -1.60888800 | -2.63185000 | -1.52850000 |
| H  | 1.95039500  | -0.04413900 | 0.13959400  |
| H  | 1.63717600  | -1.05335200 | 0.03818600  |

Imaginary frequency: -1043.57

## VI

04

|    |            |            |             |
|----|------------|------------|-------------|
| Fe | 0.36917000 | 0.72780600 | -0.00053400 |
| N  | 0.38064900 | 0.70313000 | 1.93079300  |
| C  | 1.57051700 | 0.82902000 | 2.77270600  |

|    |             |             |             |
|----|-------------|-------------|-------------|
| C  | -0.63319500 | 0.41308000  | 2.70132600  |
| C  | 1.00248500  | 0.84496800  | 4.18533600  |
| H  | 2.23486500  | -0.02261400 | 2.58354300  |
| H  | 1.50581500  | 0.18129200  | 4.88887200  |
| N  | -1.57478200 | 0.29447300  | -0.06999700 |
| C  | -2.43343200 | 0.08856500  | 0.96431500  |
| C  | -3.40997300 | 0.02623700  | -1.64586900 |
| C  | -3.82180900 | -0.18193100 | 0.72699500  |
| C  | -4.28065800 | -0.19845900 | -0.62262300 |
| H  | -3.75197600 | 0.00886500  | -2.67440200 |
| H  | -5.33128600 | -0.39325300 | -0.81303200 |
| C  | -1.99189600 | 0.12917300  | 2.32744500  |
| C  | -4.69256400 | -0.41672000 | 1.79617900  |
| C  | -4.24356300 | -0.38427400 | 3.11040100  |
| H  | -4.92791900 | -0.56672000 | 3.93097900  |
| C  | -2.91296600 | -0.10999400 | 3.36508600  |
| H  | -2.55090500 | -0.07333700 | 4.38463900  |
| H  | -5.73552300 | -0.62417600 | 1.57387600  |
| O  | -0.35044400 | 0.37202100  | 4.02296900  |
| C  | -2.04454400 | 0.25834000  | -1.37363800 |
| C  | -1.05660800 | 0.39934500  | -2.37635200 |
| C  | 1.30134500  | 0.45833900  | -2.80097000 |
| C  | 1.43235500  | -0.62829200 | -3.67594900 |
| C  | 2.31966000  | 1.41727100  | -2.76038000 |
| C  | 2.54594800  | -0.74182500 | -4.49831600 |
| C  | 3.42304100  | 1.30393500  | -3.59289400 |
| C  | 3.54436300  | 0.22584800  | -4.46643500 |
| H  | 2.63695300  | -1.59700800 | -5.16070500 |
| H  | 4.19979200  | 2.06106800  | -3.55473700 |
| H  | 4.41406800  | 0.13599800  | -5.10850600 |
| H  | 0.66409000  | -1.39523600 | -3.68477900 |
| H  | 2.22890500  | 2.23795600  | -2.05826400 |
| H  | 2.12435500  | 1.73170500  | 2.51211900  |
| H  | 0.95499600  | 1.84949900  | 4.61798700  |
| N  | 0.19968300  | 0.56223700  | -1.92677900 |
| C  | -1.42324100 | 0.39005300  | -3.82771200 |
| H  | -0.63445600 | 0.83130600  | -4.43673300 |
| H  | -1.60063900 | -0.62168600 | -4.21101500 |
| H  | -2.33918300 | 0.96037100  | -3.99770100 |
| H  | 1.13688300  | -3.96642200 | 0.67807300  |
| H  | -0.37006000 | -2.24883800 | 1.36941600  |
| Si | 0.43241100  | -2.74990200 | 0.24071700  |
| C  | -0.67354700 | -3.12768800 | -1.24968300 |
| H  | -0.09597500 | -3.56785500 | -2.06511800 |
| H  | -1.46461000 | -3.83158700 | -0.98378500 |
| H  | -1.14747300 | -2.21712700 | -1.62158200 |
| H  | 1.85398900  | 1.18873000  | 0.01846300  |
| H  | 1.44150700  | -1.73002300 | -0.10522300 |

### Sextet

I<sub>0</sub>

0 6

|    |            |             |             |
|----|------------|-------------|-------------|
| Fe | 0.12335100 | 0.50705300  | -0.02247500 |
| N  | 0.01084700 | -0.31866100 | 1.90250100  |

|   |             |             |             |
|---|-------------|-------------|-------------|
| C | 1.19151500  | -0.56897100 | 2.72623800  |
| C | -1.01916800 | -0.26021900 | 2.68827400  |
| C | 0.67589100  | -0.42950100 | 4.15562600  |
| H | 1.58340100  | -1.57043800 | 2.51270900  |
| H | 0.93368900  | -1.25946500 | 4.81451500  |
| N | -1.99186700 | 0.07259900  | -0.06474000 |
| C | -2.85926000 | -0.00027000 | 0.97359500  |
| C | -3.84705200 | -0.13071100 | -1.61489000 |
| C | -4.27974300 | -0.01751800 | 0.75664100  |
| C | -4.74160500 | -0.07692000 | -0.58740700 |
| H | -4.19480800 | -0.20280000 | -2.63849000 |
| H | -5.81081900 | -0.09968000 | -0.77333000 |
| C | -2.40692000 | -0.07653700 | 2.33356700  |
| C | -5.16809200 | 0.00306100  | 1.83695300  |
| C | -4.70582100 | 0.00717400  | 3.14483500  |
| H | -5.40071600 | 0.03177600  | 3.97624200  |
| C | -3.34214800 | -0.05186500 | 3.38018800  |
| H | -2.96968700 | -0.09702100 | 4.39566000  |
| H | -6.23409500 | 0.00869500  | 1.62702900  |
| O | -0.75849600 | -0.41129000 | 4.00860600  |
| C | -2.46162100 | -0.04205700 | -1.35258800 |
| C | -1.49304700 | -0.04274300 | -2.40694500 |
| C | 0.82682300  | 0.36031400  | -2.94469100 |
| C | 2.08871900  | -0.13147700 | -2.56963000 |
| C | 0.73114000  | 1.10190800  | -4.13454900 |
| C | 3.20066800  | 0.07273700  | -3.37092300 |
| C | 1.85044100  | 1.30631900  | -4.92838800 |
| C | 3.08863100  | 0.78690900  | -4.56071800 |
| H | 4.16245600  | -0.32401500 | -3.06247700 |
| H | 1.75664200  | 1.89078700  | -5.83832500 |
| H | 3.95938500  | 0.95168800  | -5.18572000 |
| H | 2.17613600  | -0.68711200 | -1.63868800 |
| H | -0.21572600 | 1.55287800  | -4.40863300 |
| H | 1.97430800  | 0.15272500  | 2.47677100  |
| H | 0.97508700  | 0.50846100  | 4.63295700  |
| N | -0.23048300 | 0.17852700  | -2.05502100 |
| C | -1.91554500 | -0.36087500 | -3.80956400 |
| H | -1.06608200 | -0.70272600 | -4.40101600 |
| H | -2.67297700 | -1.14675200 | -3.81985900 |
| H | -2.34326400 | 0.50464200  | -4.32786600 |
| H | 1.19558200  | 1.67998100  | 0.38396000  |

## I

06

|    |             |             |             |
|----|-------------|-------------|-------------|
| Fe | 0.58425900  | -0.51186200 | 0.34999100  |
| N  | 0.00649600  | -0.19167200 | 2.33342400  |
| C  | 1.01056700  | -0.05542100 | 3.38727800  |
| C  | -1.14620400 | 0.15923600  | 2.82131400  |
| C  | 0.24885100  | 0.60175100  | 4.53610500  |
| H  | 1.40882500  | -1.04284400 | 3.64510700  |
| H  | 0.30711900  | 0.05988600  | 5.48155700  |
| N  | -1.58860400 | -0.81350000 | 0.08471400  |
| C  | -2.62479800 | -0.39499500 | 0.85323800  |
| C  | -3.17698900 | -1.54212200 | -1.60904100 |
| C  | -3.98554700 | -0.46648900 | 0.38835100  |

|   |             |             |             |
|---|-------------|-------------|-------------|
| C | -4.22217800 | -1.06489300 | -0.87967700 |
| H | -3.35146800 | -1.99861000 | -2.57570900 |
| H | -5.24199500 | -1.13422200 | -1.24489300 |
| C | -2.42665900 | 0.14357600  | 2.17203900  |
| C | -5.03889500 | 0.02852500  | 1.16241200  |
| C | -4.81300200 | 0.58835700  | 2.41381500  |
| H | -5.63669900 | 0.97431700  | 3.00340200  |
| C | -3.52437200 | 0.62919300  | 2.90892300  |
| H | -3.33371200 | 1.03310700  | 3.89492500  |
| H | -6.04626100 | -0.03967500 | 0.76103200  |
| O | -1.12742500 | 0.58965800  | 4.10572800  |
| C | -1.85223700 | -1.40079300 | -1.13481700 |
| C | -0.74120500 | -1.82395600 | -1.92391200 |
| C | 1.63874200  | -1.79457900 | -2.21132400 |
| C | 2.75257100  | -2.31452900 | -1.53367800 |
| C | 1.75902200  | -1.51981900 | -3.58195400 |
| C | 3.92546500  | -2.59647900 | -2.21786000 |
| C | 2.93586900  | -1.80468700 | -4.26021500 |
| C | 4.02235200  | -2.35480200 | -3.58614400 |
| H | 4.76937400  | -3.01458900 | -1.67799400 |
| H | 3.00953000  | -1.57395800 | -5.31893500 |
| H | 4.93687900  | -2.59143600 | -4.12122400 |
| H | 2.67596700  | -2.49155200 | -0.46660200 |
| H | 0.93111400  | -1.05377100 | -4.10534600 |
| H | 1.85451700  | 0.53703600  | 3.02347500  |
| H | 0.53527600  | 1.64345100  | 4.70964600  |
| N | 0.47481300  | -1.51198400 | -1.48080200 |
| C | -0.98089500 | -2.66617500 | -3.14405100 |
| H | -0.08898500 | -3.23491200 | -3.40501600 |
| H | -1.79318500 | -3.37433200 | -2.97184900 |
| H | -1.25124900 | -2.07267200 | -4.02436400 |
| C | -0.31813500 | 1.86739300  | -0.55455300 |
| H | 2.22004900  | -0.37174300 | 0.72565900  |
| C | 1.00369000  | 2.13542500  | -0.55846100 |
| C | 1.82552200  | 1.86577500  | -1.75563700 |
| C | 3.14538200  | 1.41546300  | -1.65112400 |
| C | 1.31266200  | 2.08766200  | -3.04314400 |
| C | 3.92786100  | 1.18862600  | -2.77617100 |
| H | 3.55394200  | 1.18827000  | -0.67199900 |
| C | 2.08301600  | 1.87935400  | -4.17117500 |
| H | 0.29997800  | 2.46491900  | -3.15139700 |
| C | 3.39894600  | 1.42587200  | -4.04470200 |
| H | 4.93311800  | 0.80435900  | -2.65461500 |
| H | 1.69312800  | 2.06692200  | -5.16579800 |
| C | 1.71639100  | 2.74690400  | 0.62086200  |
| H | 2.43274800  | 2.00280500  | 0.99477300  |
| C | 0.83039400  | 3.22777800  | 1.75346100  |
| H | 1.43067700  | 3.64242100  | 2.56720400  |
| H | 0.13865000  | 4.00729900  | 1.42221000  |
| H | 0.22762200  | 2.41586000  | 2.16758300  |
| O | 4.07228400  | 1.23297200  | -5.20960600 |
| C | 5.41726300  | 0.80929700  | -5.11312900 |
| H | 6.03011300  | 1.53733800  | -4.56830200 |
| H | 5.49606300  | -0.16544700 | -4.61742400 |
| H | 5.78308900  | 0.72623900  | -6.13539000 |

|   |             |            |             |
|---|-------------|------------|-------------|
| H | -0.95941200 | 2.11568300 | 0.28499500  |
| H | -0.80718200 | 1.43319800 | -1.42059000 |
| H | 2.33083400  | 3.57620000 | 0.24724700  |

**TS<sub>1</sub>**

0 6

|    |             |             |             |
|----|-------------|-------------|-------------|
| Fe | 0.27518700  | -0.01455500 | 0.10212000  |
| N  | -0.03714100 | -0.18433800 | 2.17858600  |
| C  | 0.96521500  | -0.28062500 | 3.23776100  |
| C  | -1.18208400 | 0.07213500  | 2.74528900  |
| C  | 0.26808600  | 0.33684600  | 4.44152400  |
| H  | 1.22581800  | -1.33494100 | 3.39826700  |
| H  | 0.38746800  | -0.21497600 | 5.37402200  |
| N  | -1.75131900 | -0.76843700 | 0.02317200  |
| C  | -2.75813500 | -0.40561700 | 0.83613100  |
| C  | -3.34103200 | -1.56376900 | -1.61184500 |
| C  | -4.13047200 | -0.52848500 | 0.42680200  |
| C  | -4.37991300 | -1.12791300 | -0.83933900 |
| H  | -3.53369200 | -2.02551000 | -2.57347300 |
| H  | -5.40715500 | -1.23899300 | -1.17250100 |
| C  | -2.49640100 | 0.10212000  | 2.15607600  |
| C  | -5.15899600 | -0.08163600 | 1.26202100  |
| C  | -4.88091700 | 0.46297500  | 2.51122100  |
| H  | -5.68588900 | 0.81224400  | 3.14791300  |
| C  | -3.57032100 | 0.53305100  | 2.95335200  |
| H  | -3.35148100 | 0.91408700  | 3.94323500  |
| H  | -6.18508200 | -0.17534500 | 0.91729400  |
| O  | -1.12834000 | 0.29931100  | 4.08186200  |
| C  | -2.01048700 | -1.36596700 | -1.17877200 |
| C  | -0.86881400 | -1.74734600 | -1.95893000 |
| C  | 1.53569300  | -1.67957700 | -2.13371400 |
| C  | 2.60159300  | -2.07299400 | -1.30748800 |
| C  | 1.76536700  | -1.57564700 | -3.51398100 |
| C  | 3.83115400  | -2.41261900 | -1.84978300 |
| C  | 3.00142100  | -1.91246400 | -4.04939600 |
| C  | 4.03619500  | -2.34615100 | -3.22619600 |
| H  | 4.63459300  | -2.73467300 | -1.19454800 |
| H  | 3.16092900  | -1.81269300 | -5.11927600 |
| H  | 4.99745600  | -2.61827000 | -3.65067600 |
| H  | 2.43379500  | -2.11983700 | -0.23443000 |
| H  | 0.98027000  | -1.19678800 | -4.15874600 |
| H  | 1.88109300  | 0.24057600  | 2.94733400  |
| H  | 0.54578100  | 1.38374700  | 4.60728800  |
| N  | 0.32285400  | -1.35153000 | -1.51652300 |
| C  | -1.05252500 | -2.63175200 | -3.15381400 |
| H  | -0.15960400 | -3.23051100 | -3.33646000 |
| H  | -1.89375300 | -3.31093800 | -3.01106300 |
| H  | -1.24667300 | -2.06126500 | -4.06902700 |
| C  | -0.23323700 | 1.95270100  | -0.56537400 |
| H  | 1.77747300  | 0.76048100  | 0.38894400  |
| C  | 1.19271100  | 1.97134500  | -0.48453300 |
| C  | 1.96847100  | 1.74367100  | -1.75155100 |
| C  | 3.28165300  | 1.27230600  | -1.71296900 |
| C  | 1.43762800  | 2.06621800  | -3.00541000 |
| C  | 4.04223200  | 1.11249700  | -2.86220800 |



|   |             |             |             |
|---|-------------|-------------|-------------|
| H | 3.70537700  | 0.98500800  | -0.75335700 |
| C | 2.17712900  | 1.90535300  | -4.16653400 |
| H | 0.43105200  | 2.46627400  | -3.06963700 |
| C | 3.48245100  | 1.41867500  | -4.10376600 |
| H | 5.04645700  | 0.71386300  | -2.78528600 |
| H | 1.76102600  | 2.14908000  | -5.13821400 |
| C | 1.84045000  | 2.99868600  | 0.44013700  |
| H | 2.90060800  | 2.75135500  | 0.56535900  |
| C | 1.18318400  | 3.14333800  | 1.79772400  |
| H | 1.74227500  | 3.83096900  | 2.43689800  |
| H | 0.16105000  | 3.52352000  | 1.72521900  |
| H | 1.13788800  | 2.17378400  | 2.30062200  |
| O | 4.11799800  | 1.25231600  | -5.29725100 |
| C | 5.44598900  | 0.77574900  | -5.25545400 |
| H | 6.10470700  | 1.45869400  | -4.70514000 |
| H | 5.50373500  | -0.21864500 | -4.79539700 |
| H | 5.78002000  | 0.71358400  | -6.29012500 |
| H | -0.83313100 | 2.50967900  | 0.14572200  |
| H | -0.72175800 | 1.70961300  | -1.50343500 |
| H | 1.81232100  | 3.95810000  | -0.09597700 |

Imaginary Frequency:-1298.75

## II

0 6

|    |             |             |             |
|----|-------------|-------------|-------------|
| Fe | 0.34793200  | -0.16497200 | -0.24781300 |
| N  | 0.22666400  | -0.63009100 | 1.79482700  |
| C  | 1.40866800  | -0.74659600 | 2.64839600  |
| C  | -0.73918900 | -0.13389100 | 2.51445000  |
| C  | 0.99118500  | -0.07594000 | 3.95615700  |
| H  | 1.66997300  | -1.80269600 | 2.77872300  |
| H  | 1.12699700  | -0.69654600 | 4.84322200  |
| N  | -1.76956900 | -0.45118200 | -0.20759800 |
| C  | -2.60618500 | -0.17501300 | 0.81413500  |
| C  | -3.66563600 | -0.94277800 | -1.63094500 |
| C  | -4.02997900 | -0.14411500 | 0.62316100  |
| C  | -4.52760400 | -0.55665200 | -0.64656500 |
| H  | -4.04529400 | -1.27428700 | -2.59050600 |
| H  | -5.60116100 | -0.56955500 | -0.80761500 |
| C  | -2.11099700 | 0.10021800  | 2.13370300  |
| C  | -4.87445100 | 0.26414100  | 1.65809900  |
| C  | -4.36513300 | 0.62281300  | 2.90161900  |
| H  | -5.02844100 | 0.95105900  | 3.69354700  |
| C  | -3.00528600 | 0.52148500  | 3.13447500  |
| H  | -2.60537700 | 0.74361100  | 4.11577100  |
| H  | -5.94436400 | 0.29355400  | 1.47109800  |
| O  | -0.42115800 | 0.16243300  | 3.79603900  |
| C  | -2.27002400 | -0.86154300 | -1.42256700 |
| C  | -1.32059900 | -1.15458800 | -2.44740000 |
| C  | 0.99984200  | -0.96682700 | -3.07092600 |
| C  | 2.24621900  | -1.45546300 | -2.64457900 |
| C  | 0.90671200  | -0.42410400 | -4.36395200 |
| C  | 3.34683400  | -1.43140400 | -3.48656500 |
| C  | 2.01463200  | -0.39887400 | -5.19901700 |
| C  | 3.23859600  | -0.90703200 | -4.77213500 |
| H  | 4.29738500  | -1.82100100 | -3.13643100 |

|   |             |             |             |
|---|-------------|-------------|-------------|
| H | 1.92411600  | 0.03530100  | -6.18991200 |
| H | 4.10096900  | -0.88282200 | -5.42926800 |
| H | 2.32572000  | -1.85907400 | -1.63815100 |
| H | -0.02970500 | 0.01455500  | -4.69110200 |
| H | 2.26542200  | -0.25046200 | 2.17995400  |
| H | 1.47888500  | 0.88941700  | 4.12052900  |
| N | -0.04209000 | -0.93142800 | -2.14637300 |
| C | -1.77500600 | -1.75229000 | -3.74528800 |
| H | -0.94554100 | -2.23498500 | -4.26245700 |
| H | -2.55037400 | -2.50322000 | -3.57828000 |
| H | -2.19440600 | -1.00726900 | -4.43080000 |
| C | 1.88128100  | 1.20025600  | -0.23982500 |
| H | 1.12336500  | 1.95045200  | 1.64113600  |
| C | 1.64734800  | 2.34337200  | 0.74926300  |
| C | 2.91275200  | 2.99468800  | 1.27037400  |
| C | 2.99775800  | 3.43700500  | 2.58803000  |
| C | 4.02378000  | 3.21061100  | 0.44632400  |
| C | 4.13684000  | 4.06712500  | 3.08784200  |
| H | 2.14287300  | 3.29629100  | 3.24769600  |
| C | 5.16279100  | 3.83874400  | 0.91830700  |
| H | 3.99058200  | 2.86822000  | -0.58440600 |
| C | 5.22897400  | 4.27041000  | 2.24607500  |
| H | 4.16108200  | 4.39074600  | 4.12166200  |
| H | 6.02340400  | 4.00545000  | 0.27930400  |
| C | 0.71251700  | 3.40710100  | 0.15071300  |
| H | 0.55737800  | 4.20105000  | 0.89166300  |
| C | -0.63018800 | 2.85451100  | -0.29544000 |
| H | -1.31534900 | 3.64866400  | -0.60433400 |
| H | -0.53073600 | 2.17417700  | -1.15002600 |
| H | -1.12079800 | 2.30177000  | 0.51543400  |
| O | 6.39507600  | 4.86959600  | 2.62014400  |
| C | 6.48472100  | 5.32051700  | 3.95249700  |
| H | 5.72181600  | 6.07592000  | 4.17881200  |
| H | 6.38643100  | 4.49534000  | 4.66916500  |
| H | 7.47182900  | 5.76804100  | 4.05781900  |
| H | 2.05719600  | 1.58704100  | -1.25447800 |
| H | 2.78398500  | 0.62914700  | 0.02762200  |
| H | 1.22476000  | 3.88316600  | -0.69640800 |

### III

0 6

|    |             |             |             |
|----|-------------|-------------|-------------|
| Fe | 0.51013700  | -0.00512100 | -0.14506500 |
| N  | 0.06062900  | 0.55328700  | 1.82184900  |
| C  | 1.06697000  | 0.97857000  | 2.79360500  |
| C  | -0.90824300 | -0.01888600 | 2.48047400  |
| C  | 0.64050800  | 0.28341000  | 4.08122600  |
| H  | 2.06684500  | 0.68402900  | 2.46222800  |
| H  | 1.22883000  | -0.61441300 | 4.29850900  |
| N  | -1.63300900 | -0.08406700 | -0.35228700 |
| C  | -2.52751100 | -0.43897600 | 0.59303400  |
| C  | -3.39289500 | -0.10555400 | -2.01775900 |
| C  | -3.88252700 | -0.77506200 | 0.25057800  |
| C  | -4.28576500 | -0.57142600 | -1.09861300 |
| H  | -3.70274300 | 0.06654000  | -3.04250300 |

|   |             |             |             |
|---|-------------|-------------|-------------|
| H | -5.31196900 | -0.79286100 | -1.37637200 |
| C | -2.16365200 | -0.51306800 | 1.98010800  |
| C | -4.75460400 | -1.28201200 | 1.21631600  |
| C | -4.34863700 | -1.44115900 | 2.53715200  |
| H | -5.02904600 | -1.84711200 | 3.27702800  |
| C | -3.07769500 | -1.04063000 | 2.90967000  |
| H | -2.76883800 | -1.11114600 | 3.94520100  |
| H | -5.76193500 | -1.55210900 | 0.91155700  |
| O | -0.71407100 | -0.12879800 | 3.81835500  |
| C | -2.04213800 | 0.09757300  | -1.65263200 |
| C | -1.03723400 | 0.42554200  | -2.60972100 |
| C | 1.33926900  | 0.53997900  | -2.97441900 |
| C | 1.48614600  | -0.22229600 | -4.14664500 |
| C | 2.43855400  | 1.29528100  | -2.53248000 |
| C | 2.67960300  | -0.20503100 | -4.85469100 |
| C | 3.62447900  | 1.31284300  | -3.24909200 |
| C | 3.75348600  | 0.56599100  | -4.41773300 |
| H | 2.77625200  | -0.81080700 | -5.75044900 |
| H | 4.45777700  | 1.90898100  | -2.89089200 |
| H | 4.68407100  | 0.57448300  | -4.97453000 |
| H | 0.66933100  | -0.85841200 | -4.47277300 |
| H | 2.33477600  | 1.86664500  | -1.61350100 |
| H | 1.05630100  | 2.07174400  | 2.88303900  |
| H | 0.63200100  | 0.92386000  | 4.96361700  |
| N | 0.21416500  | 0.47478600  | -2.15758600 |
| C | -1.42002200 | 0.73609300  | -4.02600000 |
| H | -0.61298400 | 1.25285400  | -4.54538700 |
| H | -1.65331600 | -0.16621500 | -4.60496400 |
| H | -2.30631900 | 1.37396000  | -4.06181500 |
| C | 2.21078800  | -1.16944100 | 0.04419100  |
| H | 2.64198300  | -1.30545900 | -0.95897200 |
| H | 3.00936300  | -0.74383000 | 0.66628400  |
| C | 1.72997200  | -2.51137300 | 0.60516000  |
| H | 1.55609300  | -2.39221700 | 1.68836200  |
| C | 2.75458500  | -3.64449600 | 0.43216300  |
| H | 2.92737500  | -3.78814000 | -0.64310300 |
| H | 3.71287000  | -3.30300300 | 0.84303300  |
| C | 2.34673000  | -4.95874500 | 1.07540700  |
| H | 3.11537100  | -5.72665700 | 0.95549500  |
| H | 2.17075300  | -4.83661400 | 2.14976900  |
| H | 1.42148000  | -5.34741400 | 0.63967800  |
| C | 0.38610900  | -2.87275800 | -0.00403400 |
| C | -0.69437000 | -3.29578500 | 0.77839100  |
| C | 0.17893500  | -2.76964600 | -1.38356700 |
| C | -1.93016000 | -3.57805100 | 0.22118200  |
| H | -0.56588300 | -3.38139900 | 1.85579400  |
| C | -1.05355500 | -3.05369000 | -1.96531700 |
| H | 0.99762900  | -2.44706200 | -2.02273500 |
| C | -2.12153000 | -3.44543100 | -1.15658800 |
| H | -2.77394000 | -3.87396900 | 0.83591100  |
| H | -1.17453700 | -2.94616600 | -3.03743000 |
| O | -3.37831600 | -3.71137700 | -1.61109800 |
| C | -3.59349000 | -3.59328600 | -2.99962100 |
| H | -2.97517500 | -4.29986600 | -3.56723600 |
| H | -4.64503200 | -3.82360500 | -3.16627800 |

|                       |             |             |             |
|-----------------------|-------------|-------------|-------------|
| H                     | -3.38699900 | -2.57496300 | -3.35446800 |
| <b>TS<sub>2</sub></b> |             |             |             |
| 0 6                   |             |             |             |
| Fe                    | 0.07705200  | 0.22614900  | -0.10093600 |
| N                     | -0.08997300 | 0.29911400  | 1.99822300  |
| C                     | 1.03710300  | 0.41431100  | 2.92735200  |
| C                     | -1.15548000 | 0.09175200  | 2.71346900  |
| C                     | 0.49412600  | -0.20904300 | 4.19863500  |
| H                     | 1.92510500  | -0.08795800 | 2.53414800  |
| H                     | 0.73199700  | -1.27696700 | 4.28375800  |
| N                     | -2.07766400 | 0.36246700  | -0.09587400 |
| C                     | -2.95334500 | 0.21615800  | 0.92972300  |
| C                     | -3.94194000 | 0.62189300  | -1.63476600 |
| C                     | -4.37482400 | 0.20249600  | 0.69871400  |
| C                     | -4.83544200 | 0.43602000  | -0.62526200 |
| H                     | -4.29000300 | 0.79504700  | -2.64603100 |
| H                     | -5.90523900 | 0.45638300  | -0.81021800 |
| C                     | -2.52934100 | 0.04253000  | 2.29389600  |
| C                     | -5.27875000 | -0.03258500 | 1.73795400  |
| C                     | -4.84004400 | -0.24618600 | 3.03740400  |
| H                     | -5.54591400 | -0.43522500 | 3.83789800  |
| C                     | -3.48442800 | -0.19849700 | 3.30035900  |
| H                     | -3.12681300 | -0.34412500 | 4.31129300  |
| H                     | -6.33905000 | -0.04524200 | 1.50125000  |
| O                     | -0.93140500 | -0.08051800 | 4.04436100  |
| C                     | -2.55426000 | 0.54338700  | -1.37824300 |
| C                     | -1.61206700 | 0.56682100  | -2.45002300 |
| C                     | 0.61830500  | 0.11304300  | -3.13917200 |
| C                     | 0.41617600  | -0.94749000 | -4.03817500 |
| C                     | 1.83173100  | 0.80838000  | -3.19600900 |
| C                     | 1.40009400  | -1.30405600 | -4.94940800 |
| C                     | 2.80897600  | 0.45231500  | -4.11597000 |
| C                     | 2.60501400  | -0.60828000 | -4.99327300 |
| H                     | 1.22644400  | -2.13490100 | -5.62629700 |
| H                     | 3.73914700  | 1.01110100  | -4.14573800 |
| H                     | 3.37441600  | -0.88901100 | -5.70430100 |
| H                     | -0.51786400 | -1.50007300 | -3.99675900 |
| H                     | 1.99237200  | 1.63855700  | -2.52003100 |
| H                     | 1.29379400  | 1.47238000  | 3.06133600  |
| H                     | 0.78181200  | 0.29574200  | 5.12043200  |
| N                     | -0.32541100 | 0.41085800  | -2.14381800 |
| C                     | -2.09013400 | 0.79490300  | -3.85577700 |
| H                     | -1.25784700 | 1.01791000  | -4.52207100 |
| H                     | -2.61399700 | -0.07504700 | -4.27006200 |
| H                     | -2.78707300 | 1.63542100  | -3.90043700 |
| C                     | 1.92997400  | -1.14308000 | -0.09453000 |
| H                     | 1.98740400  | -1.32898000 | -1.17582400 |
| H                     | 2.96895500  | -1.03643400 | 0.24072000  |
| C                     | 1.28504900  | -2.32857300 | 0.64018500  |
| H                     | 1.26755900  | -2.10391200 | 1.71859600  |
| C                     | 2.11931700  | -3.61082000 | 0.46242400  |
| H                     | 2.14631300  | -3.86022600 | -0.60658200 |
| H                     | 3.15617000  | -3.38817700 | 0.74340500  |
| C                     | 1.60664300  | -4.79529400 | 1.26286300  |

|    |             |             |             |
|----|-------------|-------------|-------------|
| H  | 2.24781200  | -5.67184600 | 1.14192900  |
| H  | 1.56715300  | -4.56359100 | 2.33290000  |
| H  | 0.59618600  | -5.07996000 | 0.95631100  |
| C  | -0.15698400 | -2.54852400 | 0.22211900  |
| C  | -1.17391200 | -2.76828100 | 1.16041200  |
| C  | -0.51533400 | -2.57260100 | -1.12696500 |
| C  | -2.48905700 | -2.95781800 | 0.77626300  |
| H  | -0.92613800 | -2.76938500 | 2.22057900  |
| C  | -1.83351900 | -2.75543800 | -1.53619200 |
| H  | 0.25121700  | -2.43703100 | -1.88511800 |
| C  | -2.83271600 | -2.92640300 | -0.57838100 |
| H  | -3.27893000 | -3.09160700 | 1.50792000  |
| H  | -2.07089800 | -2.74730700 | -2.59403900 |
| O  | -4.15675000 | -3.05862900 | -0.85888400 |
| C  | -4.53445500 | -2.97967100 | -2.21618000 |
| H  | -4.10313700 | -3.79796000 | -2.80601400 |
| H  | -5.62042700 | -3.05902800 | -2.23498000 |
| H  | -4.23510000 | -2.02110200 | -2.65957900 |
| Si | 1.84865900  | 2.27636800  | 0.15107400  |
| H  | 1.84633100  | 0.37178800  | 0.05249100  |
| H  | 2.72755300  | 2.85754200  | -0.88956300 |
| C  | 0.18066500  | 3.23819900  | 0.10115700  |
| H  | -0.51108500 | 2.87976800  | 0.86902700  |
| H  | 0.33578100  | 4.30806000  | 0.26692100  |
| H  | -0.31226600 | 3.11737500  | -0.86710800 |
| H  | 2.50330000  | 2.59689100  | 1.44221800  |

Imaginary Frequency: -1186.17

#### IV

0 6

|    |             |             |             |
|----|-------------|-------------|-------------|
| Fe | -0.30596100 | 0.44426300  | -0.14569300 |
| N  | -0.59560900 | -0.29490200 | 1.76943300  |
| C  | 0.49827300  | -0.51416200 | 2.71615200  |
| C  | -1.71055200 | -0.34419100 | 2.43168400  |
| C  | -0.21139800 | -1.01524500 | 3.96536200  |
| H  | 1.21532700  | -1.23628600 | 2.31851300  |
| H  | -0.15527200 | -2.10321400 | 4.07927800  |
| N  | -2.42412200 | 0.37873600  | -0.34965100 |
| C  | -3.37648400 | 0.25252000  | 0.61044400  |
| C  | -4.16299700 | 0.68584000  | -2.02244300 |
| C  | -4.77178300 | 0.41238200  | 0.29657100  |
| C  | -5.12736700 | 0.65404600  | -1.06109000 |
| H  | -4.43433800 | 0.82361800  | -3.06216300 |
| H  | -6.17589300 | 0.77823200  | -1.31281600 |
| C  | -3.05278000 | -0.08088100 | 1.96931000  |
| C  | -5.75026300 | 0.29095200  | 1.28665400  |
| C  | -5.41106800 | -0.01227800 | 2.59767000  |
| H  | -6.17579700 | -0.10765900 | 3.35975100  |
| C  | -4.08023300 | -0.20487600 | 2.92044400  |
| H  | -3.80334800 | -0.46298900 | 3.93407900  |
| H  | -6.78946900 | 0.43060600  | 1.00159300  |
| O  | -1.59105600 | -0.66730300 | 3.74104500  |
| C  | -2.80145400 | 0.54469500  | -1.67061000 |
| C  | -1.76711400 | 0.55854400  | -2.65236500 |
| C  | 0.59741900  | 0.36295500  | -3.05596800 |

|    |             |             |             |
|----|-------------|-------------|-------------|
| C  | 0.68433600  | -0.67754400 | -3.99453200 |
| C  | 1.70590400  | 1.20341800  | -2.87705800 |
| C  | 1.84733800  | -0.86847800 | -4.72949300 |
| C  | 2.86021700  | 1.01081600  | -3.62327500 |
| C  | 2.94095700  | -0.02634900 | -4.54875600 |
| H  | 1.90090500  | -1.68435800 | -5.44363800 |
| H  | 3.70565400  | 1.67560800  | -3.47753300 |
| H  | 3.84799500  | -0.17836900 | -5.12368000 |
| H  | -0.16146800 | -1.34865800 | -4.12000000 |
| H  | 1.63721900  | 2.00597400  | -2.14945800 |
| H  | 1.03459800  | 0.43033500  | 2.87467500  |
| H  | 0.10763100  | -0.54054200 | 4.89370600  |
| N  | -0.51107400 | 0.51499800  | -2.21126800 |
| C  | -2.10513800 | 0.69788800  | -4.10715900 |
| H  | -1.22206800 | 0.95140900  | -4.69228700 |
| H  | -2.52749500 | -0.22042500 | -4.52996600 |
| H  | -2.84321700 | 1.48781700  | -4.26154200 |
| C  | 2.78178400  | -1.32899600 | -0.32231000 |
| H  | 2.41576400  | -1.03717300 | -1.31281300 |
| H  | 3.86986700  | -1.21727600 | -0.34029400 |
| C  | 2.37588900  | -2.76265800 | 0.01302500  |
| H  | 2.80589000  | -3.02699800 | 0.99158600  |
| C  | 2.95753300  | -3.73496000 | -1.02386700 |
| H  | 2.56047000  | -3.46578300 | -2.01287700 |
| H  | 4.04031800  | -3.56945400 | -1.08525700 |
| C  | 2.67024800  | -5.19492000 | -0.72553300 |
| H  | 3.13311200  | -5.85608900 | -1.46165400 |
| H  | 3.05356300  | -5.48118500 | 0.25953400  |
| H  | 1.59577600  | -5.39934100 | -0.72612800 |
| C  | 0.87517300  | -2.90830800 | 0.13027200  |
| C  | 0.27108200  | -3.48645000 | 1.25052300  |
| C  | 0.03691300  | -2.48712300 | -0.90199300 |
| C  | -1.10580500 | -3.60807800 | 1.35301300  |
| H  | 0.89917600  | -3.84439600 | 2.06463600  |
| C  | -1.34903600 | -2.60987800 | -0.82735300 |
| H  | 0.47382800  | -2.06820200 | -1.80495000 |
| C  | -1.92967000 | -3.16242300 | 0.31513500  |
| H  | -1.57332500 | -4.04427500 | 2.23013900  |
| H  | -1.95917700 | -2.25783100 | -1.65187500 |
| O  | -3.26560800 | -3.30217400 | 0.51287000  |
| C  | -4.11468400 | -2.97518900 | -0.57003600 |
| H  | -3.94275900 | -3.64205000 | -1.42424200 |
| H  | -5.13292300 | -3.10403600 | -0.20596600 |
| H  | -3.98333600 | -1.93818000 | -0.89664100 |
| Si | 0.94842700  | 2.46762500  | 0.74748400  |
| H  | 2.38668200  | -0.60354900 | 0.39749300  |
| H  | 1.21307700  | 3.61012400  | -0.16957600 |
| C  | -0.16819800 | 3.15533000  | 2.16698100  |
| H  | -0.28700700 | 2.41810100  | 2.96744200  |
| H  | 0.23519800  | 4.06663100  | 2.61636100  |
| H  | -1.17119500 | 3.38266900  | 1.79575600  |
| H  | 2.27499600  | 2.21094800  | 1.38518800  |

|    |             |             |             |
|----|-------------|-------------|-------------|
| Fe | 0.26789900  | 0.00815000  | -0.22099300 |
| N  | 0.19786800  | 0.43388100  | 1.83101000  |
| C  | 1.37304200  | 0.54114500  | 2.69369000  |
| C  | -0.82660300 | 0.15603600  | 2.58004000  |
| C  | 0.85114000  | 0.18023600  | 4.08477800  |
| H  | 2.15542900  | -0.14012500 | 2.34158800  |
| H  | 1.24375400  | -0.76467200 | 4.46962400  |
| N  | -1.80358800 | 0.44309400  | -0.17216500 |
| C  | -2.66779200 | 0.25514300  | 0.85232100  |
| C  | -3.65331400 | 1.04225200  | -1.61887600 |
| C  | -4.08715400 | 0.31957900  | 0.64541900  |
| C  | -4.54738800 | 0.72970900  | -0.63791300 |
| H  | -4.00110800 | 1.37852900  | -2.58856300 |
| H  | -5.61635800 | 0.80635900  | -0.81008600 |
| C  | -2.20860000 | 0.00225100  | 2.18775700  |
| C  | -4.97040200 | 0.01053300  | 1.68465200  |
| C  | -4.50203600 | -0.32638300 | 2.94723300  |
| H  | -5.19389700 | -0.57577000 | 3.74335100  |
| C  | -3.13922000 | -0.30361600 | 3.19382500  |
| H  | -2.76561500 | -0.50640900 | 4.18947100  |
| H  | -6.03738400 | 0.04692900  | 1.48304400  |
| O  | -0.57036700 | 0.02503800  | 3.90031100  |
| C  | -2.26811600 | 0.87277400  | -1.39447900 |
| C  | -1.29662500 | 1.09150200  | -2.41812900 |
| C  | 1.01434500  | 0.70937600  | -3.03156600 |
| C  | 0.89404800  | 0.27495600  | -4.36307400 |
| C  | 2.30122400  | 1.00266400  | -2.54522900 |
| C  | 2.01464500  | 0.17603600  | -5.17488800 |
| C  | 3.41484400  | 0.90403700  | -3.36402100 |
| C  | 3.27908700  | 0.49713100  | -4.68853000 |
| H  | 1.90016900  | -0.17199500 | -6.19671000 |
| H  | 4.39535700  | 1.14208500  | -2.96477000 |
| H  | 4.15000800  | 0.41441000  | -5.32918400 |
| H  | -0.07472000 | -0.02861200 | -4.74217900 |
| H  | 2.40759600  | 1.32097600  | -1.50975900 |
| H  | 1.77993000  | 1.55694100  | 2.64346600  |
| H  | 1.00593400  | 0.95715500  | 4.83565900  |
| N  | -0.04153400 | 0.74991400  | -2.12535200 |
| C  | -1.69748500 | 1.73762700  | -3.70917400 |
| H  | -0.83425300 | 2.18659700  | -4.20117500 |
| H  | -2.14124000 | 1.02901500  | -4.41756500 |
| H  | -2.43569200 | 2.52355800  | -3.53850200 |
| H  | 1.59868100  | -3.12250300 | -0.95863600 |
| H  | 2.99120700  | -1.93004100 | 0.51912000  |
| Si | 1.56165600  | -2.13081600 | 0.14543900  |
| C  | 0.75439600  | -3.00754300 | 1.66436300  |
| H  | 1.21008700  | -3.97800200 | 1.87747800  |
| H  | 0.84940600  | -2.39568700 | 2.56642400  |
| H  | -0.31466200 | -3.17041500 | 1.50335000  |

**TS<sub>3</sub>**

0 6

|    |            |            |             |
|----|------------|------------|-------------|
| Fe | 0.39800500 | 0.50718500 | -0.01603300 |
| N  | 0.16372500 | 0.35866400 | 2.01248400  |
| C  | 1.30141100 | 0.46080100 | 2.92652500  |

|    |             |             |             |
|----|-------------|-------------|-------------|
| C  | -0.91159300 | 0.18719600  | 2.72457800  |
| C  | 0.72314200  | -0.01323000 | 4.25157800  |
| H  | 2.13312900  | -0.15532200 | 2.57553900  |
| H  | 0.96652600  | -1.05740000 | 4.47371400  |
| N  | -1.75696000 | 0.32026200  | -0.10533300 |
| C  | -2.66340100 | 0.21512900  | 0.89707300  |
| C  | -3.56582900 | 0.33205300  | -1.72940100 |
| C  | -4.07623400 | 0.15787900  | 0.62090800  |
| C  | -4.49267000 | 0.23257700  | -0.73618500 |
| H  | -3.87840000 | 0.36939000  | -2.76566600 |
| H  | -5.55415400 | 0.19691400  | -0.95993900 |
| C  | -2.27660100 | 0.12973700  | 2.28040500  |
| C  | -5.00931800 | 0.02628600  | 1.65276400  |
| C  | -4.60831600 | -0.06233000 | 2.97970200  |
| H  | -5.33919500 | -0.16854100 | 3.77290000  |
| C  | -3.26089300 | -0.01419100 | 3.27783400  |
| H  | -2.93130100 | -0.08304700 | 4.30644800  |
| H  | -6.06276100 | -0.00898500 | 1.38964000  |
| O  | -0.70313000 | 0.07449200  | 4.05679500  |
| C  | -2.19086100 | 0.36351500  | -1.41504900 |
| C  | -1.19606000 | 0.40065100  | -2.44153700 |
| C  | 1.14288300  | 0.21258200  | -2.93690200 |
| C  | 1.16440200  | -0.88375800 | -3.81209000 |
| C  | 2.26751400  | 1.04391900  | -2.86713600 |
| C  | 2.27783300  | -1.13108300 | -4.60138300 |
| C  | 3.37541200  | 0.79110300  | -3.66426800 |
| C  | 3.38867900  | -0.29497800 | -4.53435600 |
| H  | 2.28251500  | -1.99009300 | -5.26484500 |
| H  | 4.23747000  | 1.44758500  | -3.60223100 |
| H  | 4.25969500  | -0.49297400 | -5.14960900 |
| H  | 0.31206800  | -1.55597400 | -3.83958500 |
| H  | 2.25595800  | 1.88067300  | -2.17634900 |
| H  | 1.65143500  | 1.49935100  | 2.95611400  |
| H  | 0.98263600  | 0.60427900  | 5.11140000  |
| N  | 0.07283000  | 0.42217800  | -2.05370800 |
| C  | -1.60499900 | 0.45643400  | -3.88337600 |
| H  | -0.76090000 | 0.71913500  | -4.51931000 |
| H  | -2.00339200 | -0.49847600 | -4.24252000 |
| H  | -2.38622500 | 1.20468200  | -4.03502700 |
| H  | 2.70146800  | -2.19592800 | -1.16760800 |
| H  | 2.34057800  | -2.32907900 | 1.18059800  |
| Si | 1.74793100  | -1.84317300 | -0.09272000 |
| C  | 0.11662400  | -2.81334200 | -0.36972700 |
| H  | -0.35996000 | -2.49877200 | -1.30122400 |
| H  | 0.28104000  | -3.89375700 | -0.41672100 |
| H  | -0.59034400 | -2.61022200 | 0.43852900  |
| H  | 2.01237800  | 1.17377200  | 0.08441700  |
| H  | 2.05082700  | 0.04189700  | 0.06841700  |

Imaginary Frequency:-1318.31

## VI

0 6

|    |            |             |            |
|----|------------|-------------|------------|
| Fe | 0.23814600 | 0.87596300  | 0.02194600 |
| N  | 0.08581000 | 0.04573500  | 1.94533500 |
| C  | 1.22986100 | -0.21483100 | 2.81683300 |



|    |             |             |             |
|----|-------------|-------------|-------------|
| C  | -0.98048000 | 0.06500400  | 2.68539800  |
| C  | 0.65428100  | -0.06968300 | 4.22036600  |
| H  | 1.62098600  | -1.22275700 | 2.62461200  |
| H  | 0.91464800  | -0.87626400 | 4.90615100  |
| N  | -1.86415700 | 0.36323500  | -0.10915200 |
| C  | -2.76196700 | 0.30148500  | 0.90063000  |
| C  | -3.67058600 | 0.25331000  | -1.72206100 |
| C  | -4.17722100 | 0.29594200  | 0.63901100  |
| C  | -4.59612700 | 0.27175900  | -0.71965100 |
| H  | -3.98983100 | 0.19752900  | -2.75562500 |
| H  | -5.65910700 | 0.24899600  | -0.93872100 |
| C  | -2.35528300 | 0.22478400  | 2.27702700  |
| C  | -5.10053600 | 0.30126500  | 1.68879900  |
| C  | -4.68196800 | 0.29042600  | 3.01239400  |
| H  | -5.40417800 | 0.30524800  | 3.82042200  |
| C  | -3.32771300 | 0.23840400  | 3.29191900  |
| H  | -2.98925400 | 0.19422500  | 4.31919200  |
| H  | -6.15892900 | 0.31277000  | 1.44355600  |
| O  | -0.77166200 | -0.10740300 | 4.01304000  |
| C  | -2.29466900 | 0.30647600  | -1.41402400 |
| C  | -1.28715200 | 0.27885500  | -2.43569500 |
| C  | 1.06856500  | 0.16289200  | -2.88145900 |
| C  | 1.14045900  | -0.90175000 | -3.79536900 |
| C  | 2.19557800  | 0.98507700  | -2.71986600 |
| C  | 2.29446200  | -1.11752200 | -4.53686600 |
| C  | 3.34013800  | 0.76619300  | -3.47064100 |
| C  | 3.39791500  | -0.28389800 | -4.38487200 |
| H  | 2.33492100  | -1.95170000 | -5.23045800 |
| H  | 4.19760300  | 1.41845600  | -3.33859100 |
| H  | 4.29793400  | -0.45664700 | -4.96502000 |
| H  | 0.29696200  | -1.57814000 | -3.89338200 |
| H  | 2.14583800  | 1.79109000  | -1.99181800 |
| H  | 2.03508400  | 0.49463300  | 2.60498400  |
| H  | 0.90047900  | 0.88889700  | 4.68786100  |
| N  | -0.02587700 | 0.36805200  | -2.03715600 |
| C  | -1.69437300 | 0.22536900  | -3.87865400 |
| H  | -0.86530400 | 0.49742700  | -4.53048500 |
| H  | -2.04210000 | -0.76787200 | -4.18296700 |
| H  | -2.51360300 | 0.92128100  | -4.07096300 |
| H  | 3.11568400  | -2.06035700 | -1.55846000 |
| H  | 3.09250700  | -2.44072000 | 0.80733100  |
| Si | 2.35418900  | -1.84791800 | -0.32128600 |
| C  | 0.61272700  | -2.58759600 | -0.41640800 |
| H  | 0.06726200  | -2.20013100 | -1.27872000 |
| H  | 0.65441000  | -3.67531000 | -0.50291400 |
| H  | 0.03192200  | -2.33968700 | 0.47557300  |
| H  | 1.05163600  | 2.28381000  | 0.27750800  |
| H  | 2.27185000  | -0.39069300 | -0.06222400 |

### I'(Doublet)

|     |             |             |             |
|-----|-------------|-------------|-------------|
| 0 2 |             |             |             |
| Fe  | 0.95187700  | -0.84004400 | -0.18716500 |
| N   | 0.89581400  | -0.87967600 | 1.75399500  |
| C   | 2.03580100  | -1.07009200 | 2.65114600  |
| C   | -0.10138100 | -0.43079700 | 2.46738700  |

|   |             |             |             |
|---|-------------|-------------|-------------|
| C | 1.58820400  | -0.39811300 | 3.94420400  |
| H | 2.23292800  | -2.14113300 | 2.76941700  |
| H | 1.75420500  | -0.98736100 | 4.84648000  |
| N | -1.00644800 | -0.88288900 | -0.24754700 |
| C | -1.87447800 | -0.44922000 | 0.70118500  |
| C | -2.85935700 | -1.19708900 | -1.78943600 |
| C | -3.26573000 | -0.26590200 | 0.40144100  |
| C | -3.72637700 | -0.65697300 | -0.88992200 |
| H | -3.20636800 | -1.51330600 | -2.76667500 |
| H | -4.77698000 | -0.52895100 | -1.13050300 |
| C | -1.43328800 | -0.14232600 | 2.02826800  |
| C | -4.11985100 | 0.28680100  | 1.36031200  |
| C | -3.65492400 | 0.64372100  | 2.62044100  |
| H | -4.33122500 | 1.07369200  | 3.35175700  |
| C | -2.33101100 | 0.41706700  | 2.95313400  |
| H | -1.96125100 | 0.66637900  | 3.94028500  |
| H | -5.16495500 | 0.42813500  | 1.09868800  |
| O | 0.16670300  | -0.23306200 | 3.77832600  |
| C | -1.48572900 | -1.31702800 | -1.47098800 |
| C | -0.50192100 | -1.83505900 | -2.33524200 |
| C | 1.85672500  | -2.23158800 | -2.60813100 |
| C | 2.79956900  | -3.10500100 | -2.05327200 |
| C | 2.08823900  | -1.72710400 | -3.89452400 |
| C | 3.93360900  | -3.46665100 | -2.76505700 |
| C | 3.23248700  | -2.08319400 | -4.59928600 |
| C | 4.15962500  | -2.95545800 | -4.04082700 |
| H | 4.64932800  | -4.15048600 | -2.31975000 |
| H | 3.40019200  | -1.67048200 | -5.58915000 |
| H | 5.05139100  | -3.23299900 | -4.59268800 |
| H | 2.61768800  | -3.48415500 | -1.05387100 |
| H | 1.37463300  | -1.03923000 | -4.33557000 |
| H | 2.93344700  | -0.62201100 | 2.21835300  |
| H | 2.02576300  | 0.59664000  | 4.08319200  |
| N | 0.74839800  | -1.83993000 | -1.82377900 |
| C | -0.85878600 | -2.39993300 | -3.67439200 |
| H | -0.12697800 | -3.14101300 | -3.99817600 |
| H | -1.83427500 | -2.88875700 | -3.63978200 |
| H | -0.91029200 | -1.63565800 | -4.45881300 |
| C | 2.40865500  | 0.53415700  | -0.57459600 |
| H | 2.33896600  | -1.38738800 | -0.05006200 |
| C | 1.14322700  | 1.14364400  | -0.80594300 |
| C | 0.46821800  | 1.96455500  | 0.21725500  |
| C | -0.83705600 | 2.44095700  | 0.01704700  |
| C | 1.06290400  | 2.28662700  | 1.45231500  |
| C | -1.52828300 | 3.15972400  | 0.98388000  |
| H | -1.35166900 | 2.21235300  | -0.91171800 |
| C | 0.38752100  | 2.99086000  | 2.43053300  |
| H | 2.08029500  | 1.96542500  | 1.65639900  |
| C | -0.92416700 | 3.42265300  | 2.21237700  |
| H | -2.54508500 | 3.47481900  | 0.78226500  |
| H | 0.85293400  | 3.21799800  | 3.38426300  |
| O | -1.51984700 | 4.07314400  | 3.24885900  |
| C | -2.86138400 | 4.47099900  | 3.06454100  |
| H | -2.96136200 | 5.19596000  | 2.24733300  |
| H | -3.50925600 | 3.61020300  | 2.85599000  |

|   |             |            |             |
|---|-------------|------------|-------------|
| H | -3.17123200 | 4.94018400 | 3.99709200  |
| H | 3.01722300  | 0.27599100 | -1.43857300 |
| H | 2.99778600  | 0.77942400 | 0.30478100  |
| C | 0.69055800  | 1.30948200 | -2.24170200 |
| H | 1.24779000  | 0.59819900 | -2.85722700 |
| H | -0.36676400 | 1.03500900 | -2.36265200 |
| C | 0.92486700  | 2.71985000 | -2.77549800 |
| H | 1.98342900  | 2.98790500 | -2.71225100 |
| H | 0.62106500  | 2.80338900 | -3.82254800 |
| H | 0.36633200  | 3.46705400 | -2.20598700 |

**TS<sub>1</sub>\*\* (Doublet)**

0 2

|    |             |             |             |
|----|-------------|-------------|-------------|
| Fe | 0.36290600  | -0.15464500 | 0.13016000  |
| N  | 0.33382000  | -0.21799100 | 2.07069200  |
| C  | 1.47725400  | -0.39521400 | 2.96560300  |
| C  | -0.66512500 | 0.22904400  | 2.78596600  |
| C  | 1.02839700  | 0.27697000  | 4.25855500  |
| H  | 1.68469800  | -1.46395800 | 3.08871100  |
| H  | 1.20100900  | -0.31044300 | 5.16091800  |
| N  | -1.57114200 | -0.23870700 | 0.07482400  |
| C  | -2.43864200 | 0.19366200  | 1.02386600  |
| C  | -3.42563600 | -0.59084200 | -1.45637400 |
| C  | -3.83173000 | 0.36593000  | 0.72509600  |
| C  | -4.29339600 | -0.04740900 | -0.56024500 |
| H  | -3.77436100 | -0.92288200 | -2.42783700 |
| H  | -5.34622100 | 0.06711800  | -0.79782100 |
| C  | -1.99594700 | 0.51300800  | 2.34774300  |
| C  | -4.68425100 | 0.92808400  | 1.67837000  |
| C  | -4.21713400 | 1.30384500  | 2.93405400  |
| H  | -4.89378600 | 1.74229600  | 3.66008300  |
| C  | -2.89402500 | 1.08327900  | 3.26831000  |
| H  | -2.52285700 | 1.34407000  | 4.25204500  |
| H  | -5.73071500 | 1.06177500  | 1.41826900  |
| O  | -0.39311800 | 0.43308200  | 4.09622000  |
| C  | -2.04797800 | -0.69061100 | -1.14654200 |
| C  | -1.05997100 | -1.19533800 | -2.00831600 |
| C  | 1.31233000  | -1.53876400 | -2.27743900 |
| C  | 2.29841900  | -2.34687500 | -1.69701700 |
| C  | 1.52201000  | -1.06398800 | -3.57971400 |
| C  | 3.45184500  | -2.67174900 | -2.39558900 |
| C  | 2.68328000  | -1.38563700 | -4.27277000 |
| C  | 3.65331000  | -2.19130000 | -3.68718300 |
| H  | 4.20035900  | -3.30420800 | -1.92868600 |
| H  | 2.83168800  | -0.99630200 | -5.27515500 |
| H  | 4.55845700  | -2.44098200 | -4.23043600 |
| H  | 2.13211800  | -2.70669200 | -0.68726900 |
| H  | 0.77873000  | -0.42292800 | -4.04134200 |
| H  | 2.37168000  | 0.06028300  | 2.53261200  |
| H  | 1.46184200  | 1.27393100  | 4.39490000  |
| N  | 0.19454800  | -1.17633000 | -1.49628800 |

|   |             |             |             |
|---|-------------|-------------|-------------|
| C | -1.40835300 | -1.77947000 | -3.34145400 |
| H | -0.66884700 | -2.51806600 | -3.65413900 |
| H | -2.37842700 | -2.27865700 | -3.30150300 |
| H | -1.46742500 | -1.02785200 | -4.13751900 |
| C | 1.89996800  | 1.11510600  | -0.24908900 |
| H | 1.81823900  | -0.52023200 | 0.21823100  |
| C | 0.64183200  | 1.76650500  | -0.49229600 |
| C | -0.01135600 | 2.60629900  | 0.53076400  |
| C | -1.31448200 | 3.09239800  | 0.33627200  |
| C | 0.59204100  | 2.92652500  | 1.76191100  |
| C | -1.99565500 | 3.81668300  | 1.30565600  |
| H | -1.83595300 | 2.86243700  | -0.58849300 |
| C | -0.07371200 | 3.63686300  | 2.74263100  |
| H | 1.60738100  | 2.59682300  | 1.96352500  |
| C | -1.38394300 | 4.07633200  | 2.53127500  |
| H | -3.01225300 | 4.13600100  | 1.10975700  |
| H | 0.39793600  | 3.86107000  | 3.69400200  |
| O | -1.97045400 | 4.73005100  | 3.57064600  |
| C | -3.31648000 | 5.11930500  | 3.39981000  |
| H | -3.42944500 | 5.84366400  | 2.58377600  |
| H | -3.96003800 | 4.25369000  | 3.19783500  |
| H | -3.61977800 | 5.58663600  | 4.33543500  |
| H | 2.51229800  | 0.88463800  | -1.12056700 |
| H | 2.50343500  | 1.40045700  | 0.61041100  |
| C | 0.20811900  | 1.95620100  | -1.93153000 |
| H | 0.76045500  | 1.24276500  | -2.54900200 |
| H | -0.85167100 | 1.69452300  | -2.06403600 |
| C | 0.46439700  | 3.36790100  | -2.45080500 |
| H | 1.52551700  | 3.62326000  | -2.37596500 |
| H | 0.17136500  | 3.46424000  | -3.49978600 |
| H | -0.09032700 | 4.11677400  | -1.87972100 |

Imaginary Frequency: -477.63

## II" (Doublet)

0 2

|    |             |             |             |
|----|-------------|-------------|-------------|
| Fe | -0.24336100 | -0.22109400 | -0.35470900 |
| N  | 0.10378400  | -0.12061400 | 1.54289100  |
| C  | 1.35667500  | 0.19603600  | 2.22748500  |
| C  | -0.86949900 | 0.00764700  | 2.41336400  |
| C  | 0.89982200  | 0.77239500  | 3.56422200  |
| H  | 1.95834500  | -0.71330700 | 2.33980300  |
| H  | 1.41521200  | 0.36264800  | 4.43368500  |
| N  | -1.93950000 | -0.98375600 | -0.09353000 |
| C  | -2.74738100 | -0.79433000 | 0.97858600  |
| C  | -3.74587900 | -2.09681000 | -1.27739800 |
| C  | -4.13883800 | -1.14371700 | 0.91245900  |
| C  | -4.60439800 | -1.81306500 | -0.26219700 |
| H  | -4.09439700 | -2.61613100 | -2.16337700 |
| H  | -5.64992200 | -2.09882800 | -0.31697200 |
| C  | -2.25787600 | -0.22232400 | 2.19815400  |
| C  | -4.98478000 | -0.82176200 | 1.97272600  |

|   |             |             |             |
|---|-------------|-------------|-------------|
| C | -4.50558600 | -0.18685400 | 3.11992700  |
| H | -5.18434300 | 0.06161400  | 3.92920900  |
| C | -3.16051700 | 0.09169900  | 3.23683500  |
| H | -2.76662800 | 0.55775700  | 4.13222000  |
| H | -6.03637700 | -1.08163800 | 1.88851500  |
| O | -0.48498600 | 0.40048600  | 3.65234100  |
| C | -2.39395400 | -1.67924900 | -1.21641400 |
| C | -1.43270800 | -1.86281700 | -2.21226100 |
| C | 0.85662800  | -1.32508900 | -2.82136900 |
| C | 2.14917200  | -1.57155800 | -2.33250100 |
| C | 0.71806100  | -0.97134700 | -4.17306500 |
| C | 3.25895400  | -1.46169100 | -3.15721300 |
| C | 1.83324900  | -0.86377600 | -4.99519100 |
| C | 3.10871100  | -1.10602500 | -4.49531700 |
| H | 4.24768300  | -1.66093000 | -2.75568900 |
| H | 1.70330800  | -0.57660800 | -6.03409100 |
| H | 3.97576900  | -1.01934400 | -5.14126000 |
| H | 2.25045700  | -1.85211800 | -1.28779300 |
| H | -0.26652800 | -0.75224000 | -4.57087400 |
| H | 1.94847500  | 0.90705700  | 1.64256800  |
| H | 0.95924600  | 1.86578600  | 3.59688800  |
| N | -0.20535300 | -1.35294700 | -1.90321400 |
| C | -1.71729500 | -2.64191900 | -3.45671600 |
| H | -0.81252300 | -3.12147300 | -3.83553400 |
| H | -2.44840900 | -3.42836000 | -3.26022300 |
| H | -2.11930800 | -2.02841300 | -4.27195600 |
| C | 0.98175400  | 1.48677700  | -1.06943100 |
| H | 1.36554700  | 0.46657400  | -0.67176300 |
| C | -0.51134400 | 1.59463700  | -1.07638300 |
| C | -1.20809200 | 2.31334500  | 0.01089800  |
| C | -2.61334700 | 2.33807200  | 0.04765300  |
| C | -0.55249700 | 2.92093600  | 1.09900500  |
| C | -3.32639800 | 2.88529300  | 1.10496400  |
| H | -3.17303200 | 1.86818500  | -0.75598800 |
| C | -1.24640800 | 3.46672500  | 2.16316500  |
| H | 0.53322100  | 2.95270900  | 1.12843800  |
| C | -2.64353500 | 3.43710300  | 2.18826800  |
| H | -4.40869100 | 2.83685000  | 1.09309700  |
| H | -0.72607700 | 3.91752100  | 3.00215300  |
| O | -3.23429600 | 3.95300100  | 3.29955200  |
| C | -4.63969600 | 3.84280900  | 3.38197400  |
| H | -5.13885900 | 4.40977300  | 2.58658800  |
| H | -4.96089300 | 2.79486600  | 3.32728700  |
| H | -4.92173200 | 4.26012300  | 4.34736300  |
| H | 1.41566200  | 1.50589900  | -2.07327200 |
| H | 1.51544800  | 2.19584300  | -0.43178800 |
| C | -1.16994500 | 1.62350700  | -2.44380200 |
| H | -0.55366300 | 1.04322500  | -3.13611800 |
| H | -2.13592200 | 1.10133000  | -2.41433300 |
| C | -1.35654700 | 3.03329100  | -2.99676800 |
| H | -0.39709400 | 3.55468200  | -3.07421000 |

|   |             |            |             |
|---|-------------|------------|-------------|
| H | -1.80471900 | 3.01574900 | -3.99386100 |
| H | -2.00119500 | 3.63484200 | -2.35044800 |

### III'' (Doublet)

0 2

|    |             |             |             |
|----|-------------|-------------|-------------|
| Fe | 0.50565100  | -1.16071300 | -0.36300300 |
| N  | 0.69673600  | -1.83924300 | 1.51249600  |
| C  | 1.72850900  | -2.70798100 | 2.07819800  |
| C  | -0.03195700 | -1.40847000 | 2.49855200  |
| C  | 1.62178700  | -2.47017300 | 3.57993800  |
| H  | 1.52664100  | -3.74679500 | 1.79025700  |
| H  | 1.60101500  | -3.37763900 | 4.18459200  |
| N  | -1.40190200 | -0.72718800 | 0.02366700  |
| C  | -1.93146900 | -0.35797700 | 1.21646800  |
| C  | -3.44337200 | -0.05934600 | -1.09662000 |
| C  | -3.20778700 | 0.28723900  | 1.28690700  |
| C  | -3.94308900 | 0.43282100  | 0.07347200  |
| H  | -4.01114700 | 0.02917700  | -2.01603700 |
| H  | -4.91262600 | 0.92000500  | 0.10558600  |
| C  | -1.23964500 | -0.61578300 | 2.44199500  |
| C  | -3.69836400 | 0.74011800  | 2.51772900  |
| C  | -2.98562800 | 0.53346800  | 3.69016700  |
| H  | -3.37454400 | 0.88791300  | 4.63855300  |
| C  | -1.78193200 | -0.15654300 | 3.64961500  |
| H  | -1.23246700 | -0.35125000 | 4.56281700  |
| H  | -4.65831000 | 1.24871700  | 2.53720500  |
| O  | 0.35528200  | -1.80466700 | 3.73692200  |
| C  | -2.15817100 | -0.64871400 | -1.12359800 |
| C  | -1.54403900 | -1.18961800 | -2.28620800 |
| C  | 0.46683400  | -2.21173800 | -3.14157300 |
| C  | 1.26599900  | -3.30640900 | -2.78401600 |
| C  | 0.52377100  | -1.74767800 | -4.46357700 |
| C  | 2.07465300  | -3.93226400 | -3.72034800 |
| C  | 1.34484000  | -2.37134500 | -5.39444700 |
| C  | 2.11941100  | -3.46887900 | -5.03323500 |
| H  | 2.68025500  | -4.78252900 | -3.42260200 |
| H  | 1.38838700  | -1.98653900 | -6.40856100 |
| H  | 2.75949600  | -3.95164800 | -5.76370900 |
| H  | 1.23892600  | -3.64332800 | -1.75012400 |
| H  | -0.03878800 | -0.86398000 | -4.74389200 |
| H  | 2.71062000  | -2.43792900 | 1.68222600  |
| H  | 2.40223000  | -1.80205300 | 3.95822300  |
| N  | -0.27232700 | -1.58559700 | -2.12495200 |
| C  | -2.33380300 | -1.38577900 | -3.54223500 |
| H  | -1.97299100 | -2.25143100 | -4.09975800 |
| H  | -3.38858900 | -1.54888600 | -3.31714200 |
| H  | -2.27599900 | -0.52493600 | -4.21833500 |
| C  | 3.51563800  | -1.29863800 | -1.00339800 |
| H  | 3.52871400  | -2.01939900 | -0.17896200 |
| C  | 2.32842500  | -0.36394400 | -0.95045000 |
| C  | 2.16810500  | 0.41408600  | 0.28631200  |

|   |             |             |             |
|---|-------------|-------------|-------------|
| C | 1.06778100  | 1.29319200  | 0.42572300  |
| C | 2.96365400  | 0.22600400  | 1.44269000  |
| C | 0.72266500  | 1.86769900  | 1.64836300  |
| H | 0.47750900  | 1.55093800  | -0.44852200 |
| C | 2.62438700  | 0.78356600  | 2.65834000  |
| H | 3.86432900  | -0.37678300 | 1.37432500  |
| C | 1.47801400  | 1.58309400  | 2.78178000  |
| H | -0.14946100 | 2.50905700  | 1.70464700  |
| H | 3.23936500  | 0.63388300  | 3.54061800  |
| O | 1.20218800  | 2.03655200  | 4.03526900  |
| C | 0.13021100  | 2.94975900  | 4.16337600  |
| H | 0.30381400  | 3.85545200  | 3.56936200  |
| H | -0.82367700 | 2.50153100  | 3.86156500  |
| H | 0.08367700  | 3.21584400  | 5.21837300  |
| H | 3.50276500  | -1.87778400 | -1.93141900 |
| H | 4.48191600  | -0.76993600 | -0.97071900 |
| C | 2.16737100  | 0.43243200  | -2.24276000 |
| H | 2.24370400  | -0.25836500 | -3.08870200 |
| H | 1.16052700  | 0.86549400  | -2.31597000 |
| C | 3.20232000  | 1.54299100  | -2.40632100 |
| H | 4.22145100  | 1.14510400  | -2.38709600 |
| H | 3.07870600  | 2.07490100  | -3.35405900 |
| H | 3.12472300  | 2.27776200  | -1.59905700 |

**TS<sub>2</sub><sup>o</sup> (Doublet)**

0 2

|    |             |             |             |
|----|-------------|-------------|-------------|
| Fe | -0.52393900 | -2.11823100 | -0.28731200 |
| N  | -0.75429800 | -2.85572400 | 1.59277200  |
| C  | -0.08670600 | -3.85857600 | 2.44102900  |
| C  | -1.50499500 | -2.16340600 | 2.41157900  |
| C  | -0.10994100 | -3.21310300 | 3.80501800  |
| H  | -0.68580300 | -4.77907900 | 2.40689300  |
| H  | -0.24911500 | -3.89618800 | 4.64215800  |
| N  | -2.50298300 | -1.86897100 | -0.26426300 |
| C  | -3.20530900 | -1.37297100 | 0.78346800  |
| C  | -4.48874600 | -1.70490800 | -1.64350000 |
| C  | -4.53794100 | -0.87505000 | 0.62099700  |
| C  | -5.16654700 | -1.08259900 | -0.64012100 |
| H  | -4.96768000 | -1.87708600 | -2.59954800 |
| H  | -6.18985800 | -0.74829400 | -0.77836500 |
| C  | -2.62895000 | -1.33161400 | 2.09032200  |
| C  | -5.16857700 | -0.21851900 | 1.68338100  |
| C  | -4.54054700 | -0.07932900 | 2.91477600  |
| H  | -5.03655900 | 0.44375500  | 3.72466700  |
| C  | -3.29901700 | -0.65843200 | 3.12293100  |
| H  | -2.83926800 | -0.63445900 | 4.10325900  |
| H  | -6.16718900 | 0.17879100  | 1.52586100  |
| O  | -1.27705200 | -2.36186000 | 3.73148000  |
| C  | -3.13103600 | -2.06886500 | -1.46896100 |
| C  | -2.27938900 | -2.49922500 | -2.51202500 |
| C  | -0.10320300 | -2.87122600 | -3.26885300 |

|    |             |             |             |
|----|-------------|-------------|-------------|
| C  | 0.28711000  | -4.15212800 | -3.66456300 |
| C  | 0.39347100  | -1.76613700 | -3.96604800 |
| C  | 1.18661800  | -4.32020800 | -4.71149400 |
| C  | 1.29082000  | -1.93802400 | -5.01228900 |
| C  | 1.69793300  | -3.21545200 | -5.38498100 |
| H  | 1.48767200  | -5.32161600 | -5.00273500 |
| H  | 1.67802100  | -1.06891900 | -5.53465200 |
| H  | 2.40333400  | -3.34938500 | -6.19795500 |
| H  | -0.12134800 | -5.01026300 | -3.13945600 |
| H  | 0.08612100  | -0.77002100 | -3.65951400 |
| H  | 0.91583600  | -4.09483500 | 2.10473700  |
| H  | 0.77060400  | -2.58305400 | 3.97944100  |
| N  | -0.99211800 | -2.68423000 | -2.17690100 |
| C  | -2.77577700 | -2.64285900 | -3.91769100 |
| H  | -2.25576200 | -3.44554100 | -4.44310100 |
| H  | -3.84243900 | -2.86327200 | -3.94541500 |
| H  | -2.61455200 | -1.72951200 | -4.50291800 |
| C  | 1.52093700  | -4.10894000 | -0.46044500 |
| H  | 0.70275300  | -4.57175600 | 0.09537300  |
| C  | 1.66167700  | -2.61082900 | -0.21439600 |
| C  | 2.22200600  | -2.23941100 | 1.14525200  |
| C  | 2.02103700  | -0.97349100 | 1.70410200  |
| C  | 3.06480600  | -3.09926400 | 1.87156400  |
| C  | 2.59601500  | -0.57765400 | 2.90932500  |
| H  | 1.38930400  | -0.25537600 | 1.19294100  |
| C  | 3.64098000  | -2.73389000 | 3.07779000  |
| H  | 3.27949300  | -4.09161700 | 1.48709800  |
| C  | 3.41195700  | -1.46399800 | 3.61070700  |
| H  | 2.39568600  | 0.41747500  | 3.28831700  |
| H  | 4.28803600  | -3.41491900 | 3.62072000  |
| O  | 4.01562500  | -1.19211900 | 4.80069600  |
| C  | 3.80434300  | 0.09195200  | 5.34658100  |
| H  | 4.17308900  | 0.88177900  | 4.68094600  |
| H  | 2.74315300  | 0.27448700  | 5.55668800  |
| H  | 4.36338100  | 0.12164900  | 6.28037100  |
| H  | 1.32816800  | -4.28957700 | -1.51717500 |
| H  | 2.43528500  | -4.67287500 | -0.22326600 |
| C  | 2.60555900  | -2.00792700 | -1.28568800 |
| H  | 2.12263400  | -2.07304700 | -2.26303300 |
| H  | 2.73408100  | -0.93668700 | -1.08415400 |
| C  | 3.97910100  | -2.66038400 | -1.37683200 |
| H  | 3.91367100  | -3.70187700 | -1.70519100 |
| H  | 4.60575700  | -2.13565700 | -2.10284300 |
| H  | 4.50604500  | -2.64440600 | -0.41764200 |
| Si | -0.39923100 | 0.27923200  | -0.73844200 |
| H  | 0.69403400  | -1.26672000 | -0.59446900 |
| H  | 0.83662700  | 0.93524100  | -1.22722700 |
| H  | -0.64575500 | 0.85148800  | 0.60739900  |
| C  | -1.81559100 | 0.83110700  | -1.89487600 |
| H  | -1.66825500 | 1.87158200  | -2.19526700 |
| H  | -1.87408200 | 0.22674200  | -2.80299300 |



H -2.78069000 0.75592500 -1.38962300  
Imaginary Frequency:-731.04

**IV'' (Doublet)**

0 2

|    |             |             |             |
|----|-------------|-------------|-------------|
| Fe | 0.34987000  | 0.02059900  | 0.60108400  |
| N  | 0.16044800  | 0.21935300  | 2.50730300  |
| C  | 1.21782700  | 0.44894700  | 3.50456600  |
| C  | -0.98217000 | 0.22056800  | 3.14171400  |
| C  | 0.44726600  | 0.97024300  | 4.70297200  |
| H  | 1.73234200  | -0.49840600 | 3.70848200  |
| H  | 0.76059200  | 0.55982600  | 5.66216400  |
| N  | -1.51243100 | -0.68125200 | 0.40504900  |
| C  | -2.51516600 | -0.62483000 | 1.32109800  |
| C  | -3.03623100 | -1.65880000 | -1.20968100 |
| C  | -3.84020400 | -1.05903100 | 0.98906500  |
| C  | -4.06192300 | -1.59009500 | -0.31223900 |
| H  | -3.20345600 | -2.04947400 | -2.20668400 |
| H  | -5.05886400 | -1.92961100 | -0.57472300 |
| C  | -2.28952200 | -0.12683800 | 2.64468700  |
| C  | -4.87880300 | -0.94767000 | 1.92305800  |
| C  | -4.64832000 | -0.42961000 | 3.18767000  |
| H  | -5.45894300 | -0.33922800 | 3.90170800  |
| C  | -3.36817300 | -0.03267400 | 3.53975500  |
| H  | -3.17331200 | 0.35561100  | 4.53124400  |
| H  | -5.87349600 | -1.27022100 | 1.62906200  |
| O  | -0.90889300 | 0.53264700  | 4.45312300  |
| C  | -1.75680800 | -1.18794700 | -0.85109000 |
| C  | -0.64718900 | -1.16570700 | -1.74497000 |
| C  | 1.60148200  | -0.42941000 | -2.08990800 |
| C  | 2.84940800  | -0.80032100 | -1.57694700 |
| C  | 1.53937800  | 0.14811100  | -3.36234800 |
| C  | 4.00209400  | -0.61382800 | -2.32527100 |
| C  | 2.69772000  | 0.33917600  | -4.10533900 |
| C  | 3.93327400  | -0.04278000 | -3.59425500 |
| H  | 4.96145300  | -0.90846000 | -1.91234800 |
| H  | 2.63415400  | 0.80479800  | -5.08369300 |
| H  | 4.83681700  | 0.11281900  | -4.17377700 |
| H  | 2.89573500  | -1.22332600 | -0.57759400 |
| H  | 0.58185600  | 0.48401200  | -3.74680600 |
| H  | 1.96328800  | 1.15643800  | 3.13909300  |
| H  | 0.44491800  | 2.06453500  | 4.76311200  |
| N  | 0.45819900  | -0.58035900 | -1.27699100 |
| C  | -0.74297500 | -1.82245900 | -3.08667000 |
| H  | 0.24272900  | -2.09018600 | -3.46632700 |
| H  | -1.34221600 | -2.73287600 | -3.02800300 |
| H  | -1.21220700 | -1.17624200 | -3.83687400 |
| C  | 5.09321700  | -1.59591900 | 5.57325700  |
| H  | 4.05755200  | -1.84783900 | 5.32875200  |
| C  | 5.60666200  | -0.44653700 | 4.71452000  |
| C  | 4.73799100  | 0.79220900  | 4.77412800  |

|    |            |             |             |
|----|------------|-------------|-------------|
| C  | 4.73805400 | 1.68846700  | 3.70610200  |
| C  | 3.94436500 | 1.11470500  | 5.88058700  |
| C  | 3.97403400 | 2.85127200  | 3.71081200  |
| H  | 5.33425700 | 1.46304500  | 2.82490400  |
| C  | 3.17862600 | 2.27031000  | 5.90989900  |
| H  | 3.91732000 | 0.45086100  | 6.73991400  |
| C  | 3.17760400 | 3.14260500  | 4.81883100  |
| H  | 3.97939200 | 3.49490300  | 2.83971400  |
| H  | 2.55872100 | 2.51483800  | 6.76658200  |
| O  | 2.35221000 | 4.21970300  | 4.91892500  |
| C  | 2.30598700 | 5.09845300  | 3.80918100  |
| H  | 3.28349900 | 5.55782300  | 3.62031100  |
| H  | 1.97085400 | 4.58209800  | 2.90179700  |
| H  | 1.59042600 | 5.87620400  | 4.07041900  |
| H  | 5.70032400 | -2.49200500 | 5.41910300  |
| H  | 5.12823300 | -1.36706700 | 6.64186500  |
| C  | 7.07689900 | -0.10942200 | 5.03315600  |
| H  | 7.68152300 | -1.01214100 | 4.87824800  |
| H  | 7.43145300 | 0.62115500  | 4.29642900  |
| C  | 7.31303600 | 0.43473000  | 6.43202200  |
| H  | 7.03526800 | -0.28623200 | 7.20628100  |
| H  | 8.36611100 | 0.68036800  | 6.58649300  |
| H  | 6.73405200 | 1.34592300  | 6.60839800  |
| Si | 2.02575600 | 1.78451700  | 0.46804000  |
| H  | 5.59029700 | -0.78877100 | 3.67022200  |
| H  | 3.36493700 | 1.33342200  | 0.95779100  |
| H  | 1.65509100 | 2.84018300  | 1.46670700  |
| C  | 2.36639000 | 2.71863200  | -1.17368300 |
| H  | 2.88712100 | 3.66149100  | -0.98452400 |
| H  | 2.99046700 | 2.12343300  | -1.84378000 |
| H  | 1.44131000 | 2.95098800  | -1.70712900 |

**TS<sub>3</sub><sup>o</sup> (Doublet)**

0 2

|    |             |             |             |
|----|-------------|-------------|-------------|
| Fe | 0.09085500  | -1.86118600 | -0.35873500 |
| N  | 0.46624900  | -1.99280400 | 1.51218800  |
| C  | 1.61155600  | -2.65838400 | 2.13853600  |
| C  | -0.14628600 | -1.29332200 | 2.43481200  |
| C  | 1.71822100  | -1.97356700 | 3.49364900  |
| H  | 1.41012700  | -3.73352300 | 2.21756400  |
| H  | 1.85288500  | -2.65280200 | 4.33600500  |
| N  | -1.62480000 | -0.86654700 | -0.07160600 |
| C  | -2.08801100 | -0.35892200 | 1.09910100  |
| C  | -3.55430600 | 0.01302400  | -1.24054200 |
| C  | -3.31419400 | 0.38215600  | 1.14048300  |
| C  | -4.03801600 | 0.53625000  | -0.07523700 |
| H  | -4.09653200 | 0.14650400  | -2.16977000 |
| H  | -4.97331400 | 1.08706900  | -0.05774900 |
| C  | -1.35887500 | -0.52558700 | 2.32563400  |
| C  | -3.76582600 | 0.94432900  | 2.34233600  |
| C  | -3.03853800 | 0.79281600  | 3.51418400  |

|   |             |             |             |
|---|-------------|-------------|-------------|
| H | -3.39240700 | 1.23157900  | 4.44048600  |
| C | -1.85750500 | 0.06861800  | 3.50044900  |
| H | -1.29628600 | -0.06917900 | 4.41618500  |
| H | -4.69441700 | 1.50770200  | 2.33403400  |
| O | 0.43811900  | -1.32272600 | 3.65546800  |
| C | -2.32760100 | -0.68167800 | -1.23950100 |
| C | -1.71163000 | -1.20526100 | -2.41823000 |
| C | 0.29073000  | -2.19879200 | -3.30597900 |
| C | 0.94935200  | -3.43082800 | -3.20282900 |
| C | 0.55120400  | -1.39011600 | -4.41899900 |
| C | 1.82110300  | -3.85188700 | -4.19466500 |
| C | 1.43930600  | -1.80955300 | -5.40245100 |
| C | 2.07421900  | -3.04220800 | -5.30063700 |
| H | 2.31531700  | -4.81359000 | -4.10048400 |
| H | 1.64339900  | -1.16110100 | -6.24872000 |
| H | 2.76766800  | -3.36599600 | -6.06919100 |
| H | 0.76921600  | -4.04092000 | -2.32210700 |
| H | 0.08957000  | -0.41001100 | -4.48399000 |
| H | 2.50325400  | -2.52567900 | 1.52170700  |
| H | 2.49301000  | -1.20039600 | 3.51980900  |
| N | -0.51897100 | -1.77552400 | -2.23658200 |
| C | -2.41711400 | -1.14151600 | -3.73660200 |
| H | -2.00725200 | -1.86736200 | -4.43871000 |
| H | -3.48152700 | -1.35306400 | -3.61386300 |
| H | -2.34035600 | -0.15461900 | -4.20670300 |
| C | 4.83543700  | -1.91053700 | 0.05241700  |
| H | 4.79361600  | -2.41190500 | 1.02928300  |
| C | 3.76671500  | -0.87161200 | -0.12190400 |
| C | 3.49791400  | 0.01638900  | 0.99373400  |
| C | 2.24058600  | 0.62558500  | 1.18522100  |
| C | 4.44585500  | 0.21494800  | 2.02434400  |
| C | 1.93549600  | 1.36480100  | 2.32096800  |
| H | 1.45322000  | 0.47683400  | 0.45261000  |
| C | 4.15960500  | 0.95936600  | 3.15325800  |
| H | 5.43203500  | -0.22945600 | 1.93183300  |
| C | 2.89467100  | 1.53367500  | 3.32057800  |
| H | 0.93921600  | 1.77901100  | 2.42661100  |
| H | 4.89828300  | 1.10208000  | 3.93499300  |
| O | 2.69048900  | 2.21268800  | 4.48270900  |
| C | 1.37940900  | 2.67931000  | 4.72293500  |
| H | 1.07114400  | 3.42874000  | 3.98372800  |
| H | 0.65416500  | 1.85593900  | 4.71465700  |
| H | 1.39570400  | 3.13867300  | 5.71002700  |
| H | 4.76471300  | -2.67720600 | -0.72279500 |
| H | 5.84414500  | -1.48234300 | -0.02035800 |
| C | 2.94320200  | -0.93573300 | -1.24354900 |
| H | 3.24527600  | -1.68355900 | -1.97858000 |
| H | 1.68476000  | -1.77527200 | -0.83093600 |
| C | 2.30756400  | 0.28686800  | -1.87492100 |
| H | 2.67180400  | 0.39399300  | -2.90103700 |
| H | 1.21505900  | 0.23255200  | -1.92952300 |

H 2.57047800 1.19925000 -1.33649900  
Imaginary Frequency:-1000.82

**V" (Doublet)**

0 2

|    |             |             |             |
|----|-------------|-------------|-------------|
| Fe | -0.00525200 | -1.72578000 | -0.24547600 |
| N  | 0.05493800  | -2.27083900 | 1.61915200  |
| C  | 0.91376600  | -3.33549200 | 2.14195100  |
| C  | -0.56815400 | -1.72138600 | 2.61608300  |
| C  | 0.80105400  | -3.17506800 | 3.65507900  |
| H  | 0.55039400  | -4.30292100 | 1.78002800  |
| H  | 0.52293400  | -4.08560700 | 4.18820400  |
| N  | -1.44322700 | -0.36500000 | 0.17396400  |
| C  | -1.99683800 | -0.04779400 | 1.37164600  |
| C  | -2.93644100 | 1.18972000  | -0.93718500 |
| C  | -3.03084400 | 0.94270100  | 1.46652600  |
| C  | -3.50329800 | 1.52880100  | 0.25914200  |
| H  | -3.28085900 | 1.64721100  | -1.85770900 |
| H  | -4.30832900 | 2.25536300  | 0.31074700  |
| C  | -1.55725600 | -0.66700300 | 2.58642300  |
| C  | -3.54011700 | 1.31699400  | 2.71770200  |
| C  | -3.06778500 | 0.73907000  | 3.88363100  |
| H  | -3.46059600 | 1.04209400  | 4.84742300  |
| C  | -2.09372400 | -0.24735600 | 3.81030800  |
| H  | -1.73111100 | -0.71912900 | 4.71481600  |
| H  | -4.31732800 | 2.07559600  | 2.75141300  |
| O  | -0.26491400 | -2.21795000 | 3.83496500  |
| C  | -1.87678800 | 0.26048000  | -0.97652900 |
| C  | -1.15803800 | -0.06620700 | -2.16838100 |
| C  | 0.73226500  | -1.21711100 | -3.07476900 |
| C  | 0.98065000  | -2.52424900 | -3.50676900 |
| C  | 1.46891100  | -0.16684900 | -3.63699500 |
| C  | 1.92508200  | -2.76696200 | -4.49273800 |
| C  | 2.42623900  | -0.41910600 | -4.61256600 |
| C  | 2.65602300  | -1.71912900 | -5.04946700 |
| H  | 2.10195900  | -3.78599800 | -4.82261000 |
| H  | 2.99819300  | 0.40485200  | -5.02796300 |
| H  | 3.40331100  | -1.91636400 | -5.81070200 |
| H  | 0.43305900  | -3.33382900 | -3.03762400 |
| H  | 1.29740700  | 0.84653500  | -3.28403800 |
| H  | 1.93213300  | -3.21178400 | 1.76382900  |
| H  | 1.70230600  | -2.75706300 | 4.11364200  |
| N  | -0.19181900 | -0.98103900 | -2.03711200 |
| C  | -1.52759700 | 0.56333400  | -3.47566200 |
| H  | -1.09207600 | 0.01892600  | -4.31289300 |
| H  | -2.61264100 | 0.57053000  | -3.60767000 |
| H  | -1.19200400 | 1.60398600  | -3.55357600 |
| C  | 5.11857300  | -2.08358100 | 2.25037500  |
| H  | 4.54049700  | -2.62716100 | 3.00845900  |
| C  | 4.29009400  | -1.75787200 | 1.03467200  |
| C  | 3.20820500  | -0.77450900 | 1.23239800  |

|   |             |             |             |
|---|-------------|-------------|-------------|
| C | 2.59216000  | -0.06735700 | 0.18639800  |
| C | 2.77134500  | -0.45869700 | 2.53506200  |
| C | 1.60901100  | 0.89116700  | 0.41935500  |
| H | 2.90283400  | -0.22624800 | -0.83810700 |
| C | 1.78604800  | 0.47906700  | 2.78241900  |
| H | 3.22398500  | -0.95495900 | 3.38664700  |
| C | 1.19866400  | 1.17463400  | 1.72350500  |
| H | 1.17197700  | 1.41187900  | -0.42576700 |
| H | 1.45889400  | 0.70133500  | 3.79322600  |
| O | 0.25848000  | 2.09296400  | 2.06073400  |
| C | -0.24490900 | 2.91236600  | 1.02350600  |
| H | 0.55338700  | 3.51253300  | 0.56955000  |
| H | -0.73965000 | 2.32453200  | 0.24291700  |
| H | -0.97730900 | 3.57121800  | 1.48774000  |
| H | 5.96769400  | -2.71426100 | 1.98435800  |
| H | 5.50305800  | -1.18339100 | 2.74147600  |
| C | 4.59436000  | -2.39114400 | -0.11836000 |
| H | 5.45740300  | -3.05419600 | -0.06261700 |
| H | 0.94055800  | -2.88775000 | -0.68226100 |
| C | 3.92486100  | -2.34958800 | -1.44906000 |
| H | 4.14831300  | -3.25710800 | -2.01540500 |
| H | 2.83663300  | -2.27468200 | -1.36930000 |
| H | 4.27035300  | -1.51103700 | -2.06838300 |

#### I''(Quartet)

0 4

|    |             |             |             |
|----|-------------|-------------|-------------|
| Fe | 0.70180300  | -0.30962700 | 0.19811900  |
| N  | 0.31873800  | -0.33348100 | 2.27815600  |
| C  | 1.38090100  | -0.57015900 | 3.25247000  |
| C  | -0.69531400 | 0.16282000  | 2.90996500  |
| C  | 0.87531400  | 0.13056700  | 4.50933900  |
| H  | 1.51963700  | -1.64873400 | 3.38584800  |
| H  | 0.93796600  | -0.46463500 | 5.42073500  |
| N  | -1.50152000 | -0.37082200 | 0.15354100  |
| C  | -2.38162000 | 0.16644700  | 1.03595700  |
| C  | -3.31164600 | -0.63873000 | -1.44629500 |
| C  | -3.74916900 | 0.41634700  | 0.67420900  |
| C  | -4.18395300 | -0.01010700 | -0.60975100 |
| H  | -3.63524600 | -0.98395100 | -2.42144400 |
| H  | -5.21638600 | 0.16093800  | -0.89850200 |
| C  | -1.99407800 | 0.49562500  | 2.37698700  |
| C  | -4.62228700 | 1.04256600  | 1.57337200  |
| C  | -4.20351900 | 1.40552100  | 2.84217900  |
| H  | -4.88790300 | 1.88546100  | 3.53339300  |
| C  | -2.90453400 | 1.11717100  | 3.23847900  |
| H  | -2.57067000 | 1.37351600  | 4.23653800  |
| H  | -5.64413500 | 1.22851800  | 1.25342700  |
| O  | -0.52019400 | 0.37417900  | 4.23535800  |
| C  | -1.95873000 | -0.79952300 | -1.06479800 |
| C  | -0.99116400 | -1.36201500 | -1.94834600 |
| C  | 1.34533800  | -1.60148000 | -2.40862500 |
| C  | 2.40810300  | -2.37341400 | -1.91940200 |
| C  | 1.42829000  | -1.09057100 | -3.71401200 |

|   |             |             |             |
|---|-------------|-------------|-------------|
| C | 3.51328400  | -2.63082300 | -2.71985500 |
| C | 2.53952400  | -1.34878700 | -4.50398900 |
| C | 3.58775300  | -2.12241500 | -4.01267500 |
| H | 4.32537800  | -3.23410000 | -2.32658800 |
| H | 2.58963800  | -0.93727900 | -5.50721500 |
| H | 4.45511400  | -2.32404300 | -4.63222200 |
| H | 2.34346100  | -2.75355100 | -0.90719000 |
| H | 0.62151900  | -0.47078800 | -4.09328500 |
| H | 2.32905800  | -0.17531000 | 2.87743700  |
| H | 1.35331500  | 1.10026000  | 4.68485900  |
| N | 0.27849400  | -1.27316500 | -1.55612200 |
| C | -1.42555300 | -2.05384100 | -3.20586200 |
| H | -0.63992900 | -2.71002700 | -3.58028500 |
| H | -2.31722800 | -2.65977700 | -3.02986900 |
| H | -1.66880700 | -1.35209900 | -4.01198700 |
| C | 2.00289300  | 1.28855800  | -0.20970300 |
| H | 2.14395100  | -1.00234000 | 0.54697100  |
| C | 0.71638100  | 1.82077000  | -0.41756800 |
| C | 0.00023500  | 2.59347800  | 0.60909000  |
| C | -1.29447100 | 3.08577300  | 0.37844300  |
| C | 0.55480800  | 2.87524300  | 1.87400000  |
| C | -2.00483500 | 3.80074500  | 1.33453200  |
| H | -1.78242000 | 2.88571100  | -0.57034900 |
| C | -0.14304700 | 3.57040000  | 2.84190900  |
| H | 1.55826300  | 2.53247600  | 2.10833700  |
| C | -1.43650400 | 4.03549400  | 2.58514300  |
| H | -3.00852100 | 4.13772100  | 1.10467600  |
| H | 0.29187400  | 3.76938500  | 3.81603000  |
| O | -2.05279700 | 4.68494200  | 3.61069400  |
| C | -3.36734300 | 5.14214900  | 3.37675100  |
| H | -3.40151300 | 5.88147100  | 2.56704900  |
| H | -4.04208600 | 4.31336200  | 3.12777300  |
| H | -3.69670600 | 5.61109500  | 4.30268700  |
| H | 2.60412700  | 0.99719000  | -1.06680100 |
| H | 2.57692100  | 1.49483400  | 0.68672900  |
| C | 0.21345400  | 1.90178000  | -1.84364800 |
| H | 0.77805000  | 1.18675600  | -2.44829300 |
| H | -0.83572400 | 1.58284100  | -1.91711900 |
| C | 0.38035000  | 3.29464000  | -2.44628200 |
| H | 1.43213400  | 3.59385800  | -2.43895100 |
| H | 0.03259600  | 3.32154300  | -3.48260500 |
| H | -0.17611100 | 4.05148200  | -1.88800700 |

#### TS<sub>1</sub><sup>o</sup> (Quartet)

0 4

|    |             |             |             |
|----|-------------|-------------|-------------|
| Fe | 0.51905400  | -0.11265800 | 0.15426900  |
| N  | 0.31585200  | -0.33661800 | 2.19726800  |
| C  | 1.39575600  | -0.60098100 | 3.14235100  |
| C  | -0.69339100 | 0.14254100  | 2.86750900  |
| C  | 0.91787800  | 0.06724600  | 4.42787400  |
| H  | 1.53764400  | -1.68251300 | 3.25048300  |
| H  | 1.01383200  | -0.54613400 | 5.32416200  |
| N  | -1.54538500 | -0.30274400 | 0.12945300  |
| C  | -2.40725400 | 0.21786300  | 1.03374400  |
| C  | -3.36447100 | -0.52712700 | -1.46416700 |

|   |             |             |             |
|---|-------------|-------------|-------------|
| C | -3.77589600 | 0.48655700  | 0.69010800  |
| C | -4.22355500 | 0.08791600  | -0.60376900 |
| H | -3.70312800 | -0.84722700 | -2.44351000 |
| H | -5.25730300 | 0.27180400  | -0.87896800 |
| C | -1.99015900 | 0.51203400  | 2.37403000  |
| C | -4.62196100 | 1.10661400  | 1.61342100  |
| C | -4.17671800 | 1.44430600  | 2.88734300  |
| H | -4.84765700 | 1.92211600  | 3.59352100  |
| C | -2.88211100 | 1.13529100  | 3.26455700  |
| H | -2.53103700 | 1.37112000  | 4.26182100  |
| H | -5.64583400 | 1.31608900  | 1.31504600  |
| O | -0.48387400 | 0.30025000  | 4.19723300  |
| C | -2.00908100 | -0.71534000 | -1.10583200 |
| C | -1.04136300 | -1.27822500 | -1.96793100 |
| C | 1.32926600  | -1.56562100 | -2.31193700 |
| C | 2.40583100  | -2.23793600 | -1.70896800 |
| C | 1.46826600  | -1.15827600 | -3.65116700 |
| C | 3.56884400  | -2.49710400 | -2.42023200 |
| C | 2.63652700  | -1.41959000 | -4.35337300 |
| C | 3.69399700  | -2.09185300 | -3.74594800 |
| H | 4.38489800  | -3.02313100 | -1.93445300 |
| H | 2.72487500  | -1.08562900 | -5.38267600 |
| H | 4.60458000  | -2.29477200 | -4.29920700 |
| H | 2.29762800  | -2.55229400 | -0.67644900 |
| H | 0.66311100  | -0.60795900 | -4.12662400 |
| H | 2.33822400  | -0.19033500 | 2.76575900  |
| H | 1.39414100  | 1.03740700  | 4.60794500  |
| N | 0.22729800  | -1.22197700 | -1.52606800 |
| C | -1.44481600 | -1.94821800 | -3.24602700 |
| H | -0.68879200 | -2.66834100 | -3.56218700 |
| H | -2.38851000 | -2.48390300 | -3.12470900 |
| H | -1.58003000 | -1.24327000 | -4.07502800 |
| C | 1.97465000  | 1.29872000  | -0.35532200 |
| H | 2.10298200  | -0.28062900 | 0.25610200  |
| C | 0.65927000  | 1.85158200  | -0.55153600 |
| C | -0.00904000 | 2.63165700  | 0.49839500  |
| C | -1.30951000 | 3.13532500  | 0.31187500  |
| C | 0.57568000  | 2.87824000  | 1.75901200  |
| C | -1.98968600 | 3.83261300  | 1.29964100  |
| H | -1.82318500 | 2.95201300  | -0.62670600 |
| C | -0.09223100 | 3.56143400  | 2.75615200  |
| H | 1.57740700  | 2.51460000  | 1.96917500  |
| C | -1.38744800 | 4.04225300  | 2.54037900  |
| H | -2.99874000 | 4.17489300  | 1.10412800  |
| H | 0.36681900  | 3.73462600  | 3.72405100  |
| O | -1.96962400 | 4.68148200  | 3.58979100  |
| C | -3.29555700 | 5.13129700  | 3.40710900  |
| H | -3.36274400 | 5.88070400  | 2.60900600  |
| H | -3.97000700 | 4.29865700  | 3.17128500  |
| H | -3.59559100 | 5.58587300  | 4.34994700  |
| H | 2.54025700  | 1.05258700  | -1.25174000 |
| H | 2.60642700  | 1.67628400  | 0.44377100  |
| C | 0.13961400  | 1.94691900  | -1.96851200 |
| H | 0.67938700  | 1.21876700  | -2.58182500 |
| H | -0.91573400 | 1.64379900  | -2.02363400 |

|   |             |            |             |
|---|-------------|------------|-------------|
| C | 0.31856100  | 3.33745700 | -2.57281400 |
| H | 1.37495500  | 3.62055400 | -2.58921600 |
| H | -0.05209900 | 3.37317900 | -3.60070400 |
| H | -0.21293700 | 4.10118300 | -1.99946800 |

Imaginary Frequency: -669.77

### II" (Quartet)

0 4

|    |             |             |             |
|----|-------------|-------------|-------------|
| Fe | -0.46576100 | -0.09062600 | -0.36201500 |
| N  | -0.35565800 | -0.06758500 | 1.65467800  |
| C  | 0.76799600  | 0.40654800  | 2.46249100  |
| C  | -1.43461000 | -0.00514400 | 2.39165100  |
| C  | 0.11808500  | 0.90959600  | 3.75037400  |
| H  | 1.47299000  | -0.41490400 | 2.63457300  |
| H  | 0.52838600  | 0.46722100  | 4.65999200  |
| N  | -2.22559600 | -1.10719500 | -0.18384800 |
| C  | -3.12538600 | -1.01986400 | 0.81628000  |
| C  | -3.80186900 | -2.36429000 | -1.52111900 |
| C  | -4.46107000 | -1.52168700 | 0.65407500  |
| C  | -4.76161100 | -2.19300700 | -0.57016400 |
| H  | -4.03195500 | -2.89679100 | -2.43696400 |
| H  | -5.76488700 | -2.58136200 | -0.71627800 |
| C  | -2.77516600 | -0.41739400 | 2.07054100  |
| C  | -5.40261900 | -1.34691200 | 1.66881600  |
| C  | -5.06132800 | -0.71208100 | 2.86017300  |
| H  | -5.80240200 | -0.58453600 | 3.64166600  |
| C  | -3.76674400 | -0.26974000 | 3.06000500  |
| H  | -3.48522900 | 0.18117200  | 4.00330600  |
| H  | -6.40935500 | -1.72567200 | 1.51564000  |
| O  | -1.25529800 | 0.49359400  | 3.63892800  |
| C  | -2.50395800 | -1.82659300 | -1.32734500 |
| C  | -1.43020600 | -1.95715000 | -2.24191700 |
| C  | 0.88771300  | -1.33805400 | -2.63370800 |
| C  | 2.12451600  | -1.41485500 | -1.97052300 |
| C  | 0.89546000  | -1.07262700 | -4.01330000 |
| C  | 3.31743300  | -1.25623500 | -2.65603400 |
| C  | 2.09635600  | -0.90928600 | -4.69457800 |
| C  | 3.31225900  | -1.00397800 | -4.02708300 |
| H  | 4.25852300  | -1.32744100 | -2.11982600 |
| H  | 2.07787700  | -0.69300400 | -5.75837300 |
| H  | 4.24495500  | -0.87452700 | -4.56510400 |
| H  | 2.11677600  | -1.60523900 | -0.89923400 |
| H  | -0.04144000 | -0.95558000 | -4.54520400 |
| H  | 1.30444200  | 1.20011900  | 1.93073500  |
| H  | 0.12913100  | 1.99966500  | 3.84242800  |
| N  | -0.26250500 | -1.41165900 | -1.83824800 |
| C  | -1.58944300 | -2.73994600 | -3.50809600 |
| H  | -0.63716500 | -3.16484100 | -3.82936100 |
| H  | -2.28732500 | -3.56685300 | -3.36673200 |
| H  | -1.97229900 | -2.13752200 | -4.34059400 |
| C  | 0.94760800  | 2.02019000  | -1.84569400 |



|   |             |            |             |
|---|-------------|------------|-------------|
| H | 1.71330500  | 1.79136100 | -1.09357100 |
| C | -0.45764600 | 1.72132800 | -1.36699600 |
| C | -0.91027600 | 2.46949700 | -0.18091800 |
| C | -2.24386800 | 2.40117800 | 0.27410400  |
| C | -0.01701300 | 3.20924700 | 0.62887500  |
| C | -2.64813800 | 2.94886400 | 1.48411800  |
| H | -2.98083000 | 1.86345200 | -0.31605400 |
| C | -0.40886300 | 3.75842700 | 1.83578100  |
| H | 1.00930900  | 3.34769300 | 0.30537300  |
| C | -1.72046000 | 3.60483900 | 2.29376700  |
| H | -3.67765500 | 2.82618000 | 1.79988800  |
| H | 0.29050800  | 4.31466500 | 2.45278900  |
| O | -1.98480100 | 4.10684100 | 3.53365400  |
| C | -3.28110400 | 3.88263700 | 4.04630900  |
| H | -4.04890000 | 4.38163400 | 3.44250300  |
| H | -3.51253300 | 2.81121000 | 4.09812200  |
| H | -3.28905700 | 4.30379800 | 5.05043500  |
| H | 1.19140900  | 1.42773000 | -2.73146300 |
| H | 1.08632600  | 3.07968800 | -2.11371800 |
| C | -1.46296300 | 1.56866400 | -2.50246300 |
| H | -1.02500200 | 0.90433700 | -3.25841300 |
| H | -2.37042300 | 1.04935500 | -2.16377000 |
| C | -1.85542900 | 2.89252600 | -3.15403200 |
| H | -0.98066200 | 3.40684700 | -3.56267600 |
| H | -2.56374700 | 2.74538700 | -3.97394200 |
| H | -2.32025600 | 3.56534800 | -2.42745600 |

### III'' (Quartet)

0 4

|    |             |             |             |
|----|-------------|-------------|-------------|
| Fe | 0.48654800  | -1.39217800 | -0.40052000 |
| N  | 0.44231000  | -1.89933100 | 1.55391400  |
| C  | 1.48732000  | -2.60378300 | 2.29658000  |
| C  | -0.27358900 | -1.22124200 | 2.41350900  |
| C  | 1.34810200  | -2.08246100 | 3.72585000  |
| H  | 1.32970300  | -3.68585800 | 2.22135500  |
| H  | 1.22956900  | -2.86521500 | 4.47729700  |
| N  | -1.45057100 | -0.77944300 | -0.21103400 |
| C  | -2.04704300 | -0.27492500 | 0.88771700  |
| C  | -3.34548600 | -0.12596400 | -1.56587500 |
| C  | -3.29538600 | 0.42853900  | 0.79333800  |
| C  | -3.91560000 | 0.48731000  | -0.49180200 |
| H  | -3.83550700 | -0.09701200 | -2.53249600 |
| H  | -4.86039900 | 1.01336200  | -0.58849900 |
| C  | -1.44739500 | -0.42164500 | 2.18289600  |
| C  | -3.85429000 | 1.01771300  | 1.92787600  |
| C  | -3.23198300 | 0.91252100  | 3.16902200  |
| H  | -3.67803400 | 1.37397600  | 4.04324700  |
| C  | -2.05802800 | 0.19277000  | 3.29372900  |
| H  | -1.59678200 | 0.06893200  | 4.26551300  |
| H  | -4.79333300 | 1.55471700  | 1.82656600  |
| O  | 0.13574900  | -1.30708400 | 3.70247000  |

|   |             |             |             |
|---|-------------|-------------|-------------|
| C | -2.09664600 | -0.78402300 | -1.42970900 |
| C | -1.42121500 | -1.45903600 | -2.47570200 |
| C | 0.60804500  | -2.67693300 | -3.02495300 |
| C | 1.33471400  | -3.78423300 | -2.55475200 |
| C | 0.89695000  | -2.19855900 | -4.31388300 |
| C | 2.29154800  | -4.40151300 | -3.34334000 |
| C | 1.86197800  | -2.81966900 | -5.09839000 |
| C | 2.56123300  | -3.92418300 | -4.62505300 |
| H | 2.83307600  | -5.25951300 | -2.95753900 |
| H | 2.07694900  | -2.42537600 | -6.08686700 |
| H | 3.31341400  | -4.40323000 | -5.24220900 |
| H | 1.12116800  | -4.14425700 | -1.55040800 |
| H | 0.39218200  | -1.31489800 | -4.68643600 |
| H | 2.46956600  | -2.37960500 | 1.86626200  |
| H | 2.16311500  | -1.41645300 | 4.02375300  |
| N | -0.26448300 | -2.05895600 | -2.12053700 |
| C | -2.03018900 | -1.56679600 | -3.83938400 |
| H | -1.68653600 | -2.46621100 | -4.35265500 |
| H | -3.11816800 | -1.62095800 | -3.77363400 |
| H | -1.79124100 | -0.71393300 | -4.48590500 |
| C | 3.09126500  | -0.74932800 | -1.60654000 |
| H | 3.38165600  | -1.63001700 | -1.01953400 |
| C | 1.90403700  | -0.01387100 | -1.02028700 |
| C | 2.08784800  | 0.53260500  | 0.33607900  |
| C | 1.12344300  | 1.36941300  | 0.93552200  |
| C | 3.18441500  | 0.16834400  | 1.15208300  |
| C | 1.19131100  | 1.74954700  | 2.26919200  |
| H | 0.26700400  | 1.69748200  | 0.35288700  |
| C | 3.26234800  | 0.54156800  | 2.48121700  |
| H | 3.98846700  | -0.42772300 | 0.73341500  |
| C | 2.24927800  | 1.30803400  | 3.06424400  |
| H | 0.39597500  | 2.35783100  | 2.68403800  |
| H | 4.10487100  | 0.24545500  | 3.09901700  |
| O | 2.37460400  | 1.54966500  | 4.40039400  |
| C | 1.31498100  | 2.24502600  | 5.02256200  |
| H | 1.20823900  | 3.26231400  | 4.62658600  |
| H | 0.36131900  | 1.71583800  | 4.90106900  |
| H | 1.56603300  | 2.29996400  | 6.08070800  |
| H | 2.86919400  | -1.10490400 | -2.61610400 |
| H | 3.98942400  | -0.11512500 | -1.67456400 |
| C | 1.19341300  | 0.88387900  | -2.02666900 |
| H | 1.03179000  | 0.30537000  | -2.94527600 |
| H | 0.18462100  | 1.14910900  | -1.68055900 |
| C | 1.96331300  | 2.16002300  | -2.35794600 |
| H | 2.95116200  | 1.93055700  | -2.76811400 |
| H | 1.43484900  | 2.77143500  | -3.09449200 |
| H | 2.11472500  | 2.77104500  | -1.46331800 |

**TS<sub>2</sub>" (Quartet)**

04

|    |             |             |             |
|----|-------------|-------------|-------------|
| Fe | -0.32932700 | -1.96824600 | -0.38889200 |
|----|-------------|-------------|-------------|

|   |             |             |             |
|---|-------------|-------------|-------------|
| N | -0.49626900 | -3.07347600 | 1.37005800  |
| C | 0.14300100  | -4.26224700 | 1.94072300  |
| C | -1.17334200 | -2.51465300 | 2.33511500  |
| C | 0.06785800  | -4.01643900 | 3.43817600  |
| H | -0.41432900 | -5.15523300 | 1.62787600  |
| H | -0.21268500 | -4.88696400 | 4.03118000  |
| N | -2.30942600 | -1.73348100 | -0.15668200 |
| C | -2.84662600 | -1.27535100 | 0.99657200  |
| C | -4.38293400 | -1.26332400 | -1.30167900 |
| C | -4.11373200 | -0.60988400 | 1.01573300  |
| C | -4.86821400 | -0.62186400 | -0.19650500 |
| H | -4.98630700 | -1.32039000 | -2.20041500 |
| H | -5.84714600 | -0.15353200 | -0.20967900 |
| C | -2.17319500 | -1.48585500 | 2.23888600  |
| C | -4.55450800 | -0.01214400 | 2.19991800  |
| C | -3.81745600 | -0.11472800 | 3.38046400  |
| H | -4.17152900 | 0.36786600  | 4.28475400  |
| C | -2.66430700 | -0.87699900 | 3.40911500  |
| H | -2.13378500 | -1.04239800 | 4.33977100  |
| H | -5.49397400 | 0.53338900  | 2.18705400  |
| O | -0.98329100 | -3.03647700 | 3.56851000  |
| C | -3.08351700 | -1.81631900 | -1.29902700 |
| C | -2.42068000 | -2.37714800 | -2.41932600 |
| C | -0.36870100 | -3.16799400 | -3.30969300 |
| C | -0.48259500 | -4.52150400 | -3.65044200 |
| C | 0.58285200  | -2.38626000 | -3.97697700 |
| C | 0.34349300  | -5.07624200 | -4.61981500 |
| C | 1.40389600  | -2.94480100 | -4.94876800 |
| C | 1.29234800  | -4.29378000 | -5.27248800 |
| H | 0.24954300  | -6.12998800 | -4.86417300 |
| H | 2.13583400  | -2.32239500 | -5.45465500 |
| H | 1.93747900  | -4.73136000 | -6.02666900 |
| H | -1.20963500 | -5.13407100 | -3.12505800 |
| H | 0.67163800  | -1.33598400 | -3.71322200 |
| H | 1.17058900  | -4.37363200 | 1.59365700  |
| H | 0.99056900  | -3.58227200 | 3.83922700  |
| N | -1.11682200 | -2.60856600 | -2.26240900 |
| C | -3.11186400 | -2.61035200 | -3.72587700 |
| H | -3.30889600 | -3.67425000 | -3.89404500 |
| H | -4.06635500 | -2.08973900 | -3.78770600 |
| H | -2.48777600 | -2.27632800 | -4.56040900 |
| C | 1.88518200  | -3.52293300 | -0.87410600 |
| H | 0.99725400  | -4.09578000 | -0.58405600 |
| C | 1.88607900  | -2.08031300 | -0.37701200 |
| C | 2.20888300  | -1.86489400 | 1.07998500  |
| C | 1.74341500  | -0.72923800 | 1.75120800  |
| C | 3.04077100  | -2.72527000 | 1.81176000  |
| C | 2.03545500  | -0.47684400 | 3.08701700  |
| H | 1.10663100  | -0.02070500 | 1.22662100  |
| C | 3.35548500  | -2.48824900 | 3.14117800  |
| H | 3.46021900  | -3.60545300 | 1.33306700  |

|    |             |             |             |
|----|-------------|-------------|-------------|
| C  | 2.84335100  | -1.36639600 | 3.79618700  |
| H  | 1.62486900  | 0.40635300  | 3.56130900  |
| H  | 4.00066500  | -3.16175700 | 3.69569200  |
| O  | 3.17644000  | -1.23439500 | 5.10832600  |
| C  | 2.64706500  | -0.11960300 | 5.79525400  |
| H  | 2.98967400  | 0.82605700  | 5.35845000  |
| H  | 1.55025400  | -0.13159400 | 5.79960500  |
| H  | 3.01046400  | -0.19283200 | 6.81876500  |
| H  | 1.93189300  | -3.54607200 | -1.96475700 |
| H  | 2.75361300  | -4.09014300 | -0.51457500 |
| C  | 2.85875400  | -1.24356200 | -1.24111400 |
| H  | 2.49640400  | -1.23508400 | -2.27720500 |
| H  | 2.83861000  | -0.20138200 | -0.90190200 |
| C  | 4.29505600  | -1.74698400 | -1.21610900 |
| H  | 4.38186700  | -2.75344200 | -1.63523000 |
| H  | 4.94354000  | -1.09449700 | -1.80572600 |
| H  | 4.69494500  | -1.77304800 | -0.19827200 |
| Si | -0.31524200 | 0.40093700  | -1.24633700 |
| H  | 0.79200100  | -0.99613800 | -0.91329800 |
| H  | 0.92991900  | 1.15378600  | -1.52264300 |
| H  | -0.87005500 | 0.99935200  | -0.01089200 |
| C  | -1.48255200 | 0.70171200  | -2.71702100 |
| H  | -1.39198800 | 1.74460900  | -3.03125400 |
| H  | -1.23402700 | 0.06947200  | -3.57167700 |
| H  | -2.52224200 | 0.51536200  | -2.44900000 |

Imaginary Frequency: -867.75

#### IV" (Quartet)

0 4

|    |             |             |             |
|----|-------------|-------------|-------------|
| Fe | 0.36054200  | 0.12818600  | 0.51366200  |
| N  | 0.34875700  | 0.15767800  | 2.46850700  |
| C  | 1.47474300  | 0.45427800  | 3.36978800  |
| C  | -0.66225400 | -0.20433800 | 3.21735500  |
| C  | 0.81202100  | 0.56542400  | 4.72849500  |
| H  | 2.20592100  | -0.36310800 | 3.31563800  |
| H  | 1.34293200  | 0.07096400  | 5.54174300  |
| N  | -1.38985000 | -0.84892600 | 0.45598500  |
| C  | -2.27271100 | -1.04970600 | 1.46997800  |
| C  | -2.97874200 | -1.82369800 | -1.10817400 |
| C  | -3.56610400 | -1.62125400 | 1.22419400  |
| C  | -3.88668600 | -2.00382400 | -0.10966600 |
| H  | -3.22053500 | -2.10403300 | -2.12655800 |
| H  | -4.86130700 | -2.43789100 | -0.30850700 |
| C  | -1.94968400 | -0.70934700 | 2.82229600  |
| C  | -4.47576600 | -1.79855800 | 2.27142000  |
| C  | -4.15232500 | -1.43912800 | 3.57321400  |
| H  | -4.86648500 | -1.57690500 | 4.37691400  |
| C  | -2.90336100 | -0.90942200 | 3.83840300  |
| H  | -2.63184200 | -0.63824700 | 4.85038000  |
| H  | -5.44658000 | -2.22851000 | 2.04154600  |
| O  | -0.45302700 | -0.10878600 | 4.54602000  |

|    |             |             |             |
|----|-------------|-------------|-------------|
| C  | -1.72543200 | -1.23682100 | -0.82921200 |
| C  | -0.74480500 | -0.98180800 | -1.81669700 |
| C  | 1.40479700  | -0.03640200 | -2.27822700 |
| C  | 2.71163200  | -0.41177400 | -1.94883900 |
| C  | 1.18616300  | 0.68157400  | -3.45848700 |
| C  | 3.76976200  | -0.08687900 | -2.78539600 |
| C  | 2.24862800  | 1.00435100  | -4.29311900 |
| C  | 3.54443900  | 0.62132900  | -3.96344300 |
| H  | 4.77719600  | -0.38552500 | -2.51402400 |
| H  | 2.06332200  | 1.57312900  | -5.19877300 |
| H  | 4.37338900  | 0.87957000  | -4.61353500 |
| H  | 2.88061900  | -0.95288500 | -1.02249500 |
| H  | 0.18125400  | 1.01316300  | -3.69873500 |
| H  | 1.98858200  | 1.37017300  | 3.07798600  |
| H  | 0.60535700  | 1.60195200  | 5.01609200  |
| N  | 0.35681600  | -0.34791000 | -1.38293400 |
| C  | -0.91923600 | -1.47103900 | -3.22063300 |
| H  | 0.04459400  | -1.64517400 | -3.69940500 |
| H  | -1.47488500 | -2.40947700 | -3.23777100 |
| H  | -1.46492400 | -0.76043700 | -3.85158100 |
| C  | 4.09083100  | -1.34528500 | 6.11593700  |
| H  | 3.13219100  | -1.48063500 | 5.60714400  |
| C  | 5.06428700  | -0.53675700 | 5.26538500  |
| C  | 4.54906000  | 0.83727500  | 4.89188200  |
| C  | 4.90680900  | 1.40147700  | 3.66787000  |
| C  | 3.75002100  | 1.61114800  | 5.74168200  |
| C  | 4.49532400  | 2.67386600  | 3.28640500  |
| H  | 5.51672100  | 0.82267300  | 2.97739100  |
| C  | 3.32036500  | 2.87934500  | 5.37949800  |
| H  | 3.45190000  | 1.21946300  | 6.71060200  |
| C  | 3.68968700  | 3.42259100  | 4.14579300  |
| H  | 4.77857200  | 3.05659300  | 2.31397700  |
| H  | 2.69874200  | 3.47440600  | 6.04039100  |
| O  | 3.21408100  | 4.66410700  | 3.87215900  |
| C  | 3.61343000  | 5.25279300  | 2.64796800  |
| H  | 4.70295000  | 5.36616400  | 2.59594700  |
| H  | 3.26804100  | 4.66583600  | 1.78946300  |
| H  | 3.14849100  | 6.23677900  | 2.62190200  |
| H  | 4.49476300  | -2.33969400 | 6.32553200  |
| H  | 3.88553600  | -0.87507100 | 7.08146800  |
| C  | 6.45956200  | -0.45528300 | 5.91565600  |
| H  | 6.83858900  | -1.47669500 | 6.04851300  |
| H  | 7.14130000  | 0.03030400  | 5.20733700  |
| C  | 6.50352900  | 0.28346800  | 7.24245300  |
| H  | 5.88388000  | -0.20062900 | 8.00297700  |
| H  | 7.52145300  | 0.32254900  | 7.63674000  |
| H  | 6.15323500  | 1.31431800  | 7.13870700  |
| Si | 2.06694500  | 1.88931800  | 0.42497100  |
| H  | 5.19992000  | -1.08429800 | 4.32201400  |
| H  | 3.44929100  | 1.37853400  | 0.67076400  |
| H  | 1.85270500  | 2.85042000  | 1.54987200  |

|   |            |            |             |
|---|------------|------------|-------------|
| C | 2.20313900 | 3.00006100 | -1.13833800 |
| H | 2.72350600 | 3.93266500 | -0.89986700 |
| H | 2.76213500 | 2.50479500 | -1.93442800 |
| H | 1.22266700 | 3.26588500 | -1.54142400 |

**TS<sub>3</sub>" (Quartet)**

0 4

|    |             |             |             |
|----|-------------|-------------|-------------|
| Fe | 0.10510100  | -1.93563800 | -0.38860400 |
| N  | 0.52617900  | -2.06428600 | 1.49711500  |
| C  | 1.71578700  | -2.67838400 | 2.08947600  |
| C  | -0.10505200 | -1.40559900 | 2.43741800  |
| C  | 1.79335100  | -2.03849700 | 3.46838200  |
| H  | 1.58584700  | -3.76668100 | 2.12788500  |
| H  | 1.96066700  | -2.73814600 | 4.28777800  |
| N  | -1.53246600 | -0.84719400 | -0.07620400 |
| C  | -1.99683300 | -0.37233100 | 1.10830200  |
| C  | -3.36217500 | 0.24568300  | -1.24647300 |
| C  | -3.17580400 | 0.44430500  | 1.15954400  |
| C  | -3.84408400 | 0.73103300  | -0.06979800 |
| H  | -3.86090600 | 0.47888300  | -2.18053200 |
| H  | -4.73575900 | 1.34932900  | -0.04298200 |
| C  | -1.31723400 | -0.63691500 | 2.34502700  |
| C  | -3.63946400 | 0.94448500  | 2.37874500  |
| C  | -2.97158600 | 0.67522500  | 3.56970900  |
| H  | -3.34536200 | 1.06466000  | 4.51001600  |
| C  | -1.82857500 | -0.09876000 | 3.54568900  |
| H  | -1.30294700 | -0.32032800 | 4.46611100  |
| H  | -4.53922200 | 1.55357800  | 2.37709000  |
| O  | 0.48611400  | -1.45116700 | 3.65132300  |
| C  | -2.19521900 | -0.55254400 | -1.26237300 |
| C  | -1.61567200 | -1.09653300 | -2.42470900 |
| C  | 0.27201400  | -2.37414800 | -3.25301200 |
| C  | 0.76436300  | -3.68077400 | -3.12596000 |
| C  | 0.67132000  | -1.61686800 | -4.36239000 |
| C  | 1.61512300  | -4.21577300 | -4.07995300 |
| C  | 1.52992200  | -2.15652600 | -5.31328100 |
| C  | 2.00474300  | -3.45662700 | -5.18231200 |
| H  | 1.97927500  | -5.23168000 | -3.96352800 |
| H  | 1.83698000  | -1.54883700 | -6.15895800 |
| H  | 2.67520700  | -3.87337300 | -5.92600400 |
| H  | 0.46768600  | -4.26261200 | -2.25665000 |
| H  | 0.33501300  | -0.58970900 | -4.45457300 |
| H  | 2.59271100  | -2.46673700 | 1.47247000  |
| H  | 2.53084800  | -1.23077700 | 3.52036500  |
| N  | -0.50989400 | -1.84724700 | -2.20988400 |
| C  | -2.23448200 | -0.91476200 | -3.77462200 |
| H  | -1.96288300 | -1.73203200 | -4.44431500 |
| H  | -3.32333900 | -0.89433000 | -3.70208800 |
| H  | -1.92905100 | 0.01683900  | -4.26552400 |
| C  | 4.83515400  | -1.65232100 | -0.09865100 |
| H  | 4.84877400  | -2.18019200 | 0.86374900  |

|   |            |             |             |
|---|------------|-------------|-------------|
| C | 3.70570400 | -0.67142600 | -0.21481000 |
| C | 3.40774700 | 0.15912500  | 0.93966000  |
| C | 2.11717500 | 0.67084800  | 1.18085400  |
| C | 4.36709000 | 0.38417500  | 1.95287000  |
| C | 1.79110800 | 1.34532800  | 2.35052500  |
| H | 1.32392000 | 0.49560200  | 0.46112300  |
| C | 4.06065900 | 1.06659900  | 3.11460100  |
| H | 5.37844700 | 0.01269100  | 1.81972100  |
| C | 2.76306400 | 1.54474200  | 3.33247700  |
| H | 0.77210300 | 1.68605200  | 2.49452500  |
| H | 4.80779500 | 1.23377000  | 3.88314900  |
| O | 2.54368700 | 2.16463400  | 4.52147500  |
| C | 1.21071200 | 2.53936200  | 4.80904100  |
| H | 0.83847600 | 3.29141600  | 4.10323500  |
| H | 0.53932600 | 1.67246300  | 4.78937900  |
| H | 1.22512900 | 2.96585400  | 5.81057100  |
| H | 4.78760900 | -2.39876400 | -0.89464400 |
| H | 5.81309000 | -1.16081600 | -0.18555500 |
| C | 2.87774800 | -0.73278200 | -1.32776600 |
| H | 3.19277700 | -1.44793300 | -2.08927400 |
| H | 1.66185600 | -1.66119100 | -0.87449700 |
| C | 2.13594600 | 0.45654500  | -1.89576600 |
| H | 2.47867200 | 0.63751600  | -2.91897700 |
| H | 1.05132500 | 0.31038100  | -1.94485900 |
| H | 2.32682200 | 1.36459200  | -1.32131900 |

Imaginary Frequency: -940.95

### V'' (Quartet)

0 4

|    |             |             |             |
|----|-------------|-------------|-------------|
| Fe | -0.09621300 | -1.74500700 | -0.29032300 |
| N  | 0.07901500  | -2.28346200 | 1.55560700  |
| C  | 0.94131200  | -3.35344000 | 2.05739500  |
| C  | -0.50747900 | -1.71263500 | 2.57080500  |
| C  | 0.87843700  | -3.18309900 | 3.57223100  |
| H  | 0.55734100  | -4.31971100 | 1.71486800  |
| H  | 0.59103800  | -4.08451100 | 4.11623500  |
| N  | -1.46598600 | -0.37474400 | 0.14643900  |
| C  | -1.97390200 | -0.04882700 | 1.36368500  |
| C  | -3.01778700 | 1.16863900  | -0.92056400 |
| C  | -3.00644200 | 0.93866000  | 1.48845800  |
| C  | -3.53529400 | 1.51064300  | 0.29191200  |
| H  | -3.40439800 | 1.61220000  | -1.83149900 |
| H  | -4.34601700 | 2.22813500  | 0.37288100  |
| C  | -1.48876400 | -0.65837900 | 2.56585600  |
| C  | -3.46443600 | 1.32720500  | 2.75048800  |
| C  | -2.94539200 | 0.76219600  | 3.90883500  |
| H  | -3.30027900 | 1.07908500  | 4.88277900  |
| C  | -1.97906400 | -0.22220900 | 3.80933400  |
| H  | -1.58018400 | -0.68367800 | 4.70397300  |
| H  | -4.23865400 | 2.08763100  | 2.80624700  |
| O  | -0.15474000 | -2.19714300 | 3.78076900  |

|   |             |             |             |
|---|-------------|-------------|-------------|
| C | -1.94538900 | 0.25018600  | -0.99745900 |
| C | -1.25720000 | -0.06759000 | -2.18686200 |
| C | 0.68840400  | -1.15436100 | -3.07402200 |
| C | 1.04885800  | -2.44722900 | -3.47357200 |
| C | 1.33982500  | -0.06175200 | -3.66489800 |
| C | 2.01708100  | -2.63584400 | -4.44877400 |
| C | 2.31714200  | -0.25870900 | -4.63185100 |
| C | 2.65842100  | -1.54639800 | -5.03353400 |
| H | 2.27981300  | -3.64524000 | -4.74999500 |
| H | 2.81964000  | 0.59923500  | -5.06764400 |
| H | 3.42172300  | -1.69999200 | -5.78884300 |
| H | 0.56480400  | -3.28893000 | -2.99123400 |
| H | 1.08709800  | 0.94284400  | -3.33787000 |
| H | 1.94973600  | -3.24124200 | 1.64941500  |
| H | 1.80394800  | -2.78996100 | 4.00305700  |
| N | -0.25922700 | -0.96539500 | -2.05028700 |
| C | -1.66071800 | 0.51598300  | -3.50552800 |
| H | -1.26931300 | -0.07684500 | -4.33266000 |
| H | -2.74902800 | 0.54379800  | -3.59889500 |
| H | -1.30296100 | 1.54208100  | -3.64732200 |
| C | 5.19986000  | -1.99100100 | 2.31566100  |
| H | 4.66335300  | -2.48923600 | 3.13295200  |
| C | 4.31769300  | -1.77760500 | 1.11388000  |
| C | 3.23355100  | -0.78928500 | 1.27185700  |
| C | 2.62905600  | -0.12163800 | 0.19538200  |
| C | 2.78903300  | -0.42509900 | 2.55861700  |
| C | 1.64327600  | 0.84398800  | 0.38195600  |
| H | 2.95473400  | -0.31722400 | -0.81893900 |
| C | 1.80532900  | 0.52459400  | 2.76164900  |
| H | 3.23642800  | -0.88871000 | 3.43145200  |
| C | 1.22559200  | 1.17856300  | 1.67202300  |
| H | 1.21397100  | 1.33334700  | -0.48529500 |
| H | 1.47090300  | 0.78668100  | 3.76026900  |
| O | 0.28881400  | 2.11336900  | 1.96780900  |
| C | -0.21807900 | 2.88372900  | 0.89496100  |
| H | 0.57821400  | 3.46382900  | 0.41232300  |
| H | -0.71371000 | 2.25963600  | 0.14360600  |
| H | -0.95013500 | 3.56212800  | 1.33055400  |
| H | 6.05444600  | -2.62092200 | 2.06515900  |
| H | 5.57693200  | -1.04726500 | 2.72320000  |
| C | 4.56823100  | -2.50680900 | 0.00626800  |
| H | 5.44008500  | -3.15777600 | 0.06746800  |
| H | 0.74505500  | -2.98544900 | -0.70200500 |
| C | 3.81406800  | -2.58524800 | -1.27654500 |
| H | 3.96943300  | -3.55795500 | -1.75117600 |
| H | 2.73592000  | -2.45847600 | -1.14062500 |
| H | 4.14228100  | -1.83502300 | -2.00831500 |

**I" (Sextet)**

0 6

|    |            |             |            |
|----|------------|-------------|------------|
| Fe | 0.71930100 | -0.71893600 | 0.38533900 |
|----|------------|-------------|------------|



|   |             |             |             |
|---|-------------|-------------|-------------|
| N | 0.41912000  | -0.27432500 | 2.39107300  |
| C | 1.51540200  | -0.42171000 | 3.34492100  |
| C | -0.60294900 | 0.21738200  | 3.02237700  |
| C | 1.02554300  | 0.35218200  | 4.56271200  |
| H | 1.68509600  | -1.48563700 | 3.54550400  |
| H | 1.14850100  | -0.16791100 | 5.51310700  |
| N | -1.45407900 | -0.34560400 | 0.24726200  |
| C | -2.32062100 | 0.15022200  | 1.16952600  |
| C | -3.28308000 | -0.47417900 | -1.35915600 |
| C | -3.69992300 | 0.41076700  | 0.84113700  |
| C | -4.14836900 | 0.07872000  | -0.46660700 |
| H | -3.62077700 | -0.73289600 | -2.35512400 |
| H | -5.18466100 | 0.26742100  | -0.72931600 |
| C | -1.92096100 | 0.46818700  | 2.51484500  |
| C | -4.57489600 | 0.97350400  | 1.77425400  |
| C | -4.15132400 | 1.29604100  | 3.05836400  |
| H | -4.83786100 | 1.72845400  | 3.77806200  |
| C | -2.84175100 | 1.04065600  | 3.41288200  |
| H | -2.49192900 | 1.28534900  | 4.40784300  |
| H | -5.60437600 | 1.14553000  | 1.47071200  |
| O | -0.38585900 | 0.51734700  | 4.32627100  |
| C | -1.93003000 | -0.68283600 | -1.00716200 |
| C | -1.00487700 | -1.21042700 | -1.95543200 |
| C | 1.29066600  | -1.63420200 | -2.48339600 |
| C | 2.27611200  | -2.55332300 | -2.09474800 |
| C | 1.41001800  | -1.01682700 | -3.74016300 |
| C | 3.33098600  | -2.85416400 | -2.94507300 |
| C | 2.47238900  | -1.31918300 | -4.58080500 |
| C | 3.43841400  | -2.24170000 | -4.19039300 |
| H | 4.07888100  | -3.57434600 | -2.62850000 |
| H | 2.54736400  | -0.82653700 | -5.54530100 |
| H | 4.26793500  | -2.47734800 | -4.84852800 |
| H | 2.19747800  | -3.01152500 | -1.11629900 |
| H | 0.66755700  | -0.28583500 | -4.04523400 |
| H | 2.44724600  | -0.03304400 | 2.92435300  |
| H | 1.46924400  | 1.35087700  | 4.64503800  |
| N | 0.26892200  | -1.29573300 | -1.58238900 |
| C | -1.50169100 | -1.70973100 | -3.28228300 |
| H | -0.76694300 | -2.36201500 | -3.75248100 |
| H | -2.42567100 | -2.27866000 | -3.16166700 |
| H | -1.71379500 | -0.89889400 | -3.98840600 |
| C | 2.02359400  | 1.24623400  | 0.01228400  |
| H | 2.14061500  | -1.57407900 | 0.64820700  |
| C | 0.88096900  | 1.89118300  | -0.36365000 |
| C | 0.03526300  | 2.62652100  | 0.58885500  |
| C | -1.27631100 | 2.99500700  | 0.26186700  |
| C | 0.48986600  | 2.98310100  | 1.87283400  |
| C | -2.10667500 | 3.65833300  | 1.15592600  |
| H | -1.68435700 | 2.72418100  | -0.70693200 |
| C | -0.32231700 | 3.63376300  | 2.77781700  |
| H | 1.50927700  | 2.74784800  | 2.16364900  |

|   |             |            |             |
|---|-------------|------------|-------------|
| C | -1.63594500 | 3.97139500 | 2.43016200  |
| H | -3.12283100 | 3.89216000 | 0.86289400  |
| H | 0.03198600  | 3.89534100 | 3.76932600  |
| O | -2.36524600 | 4.58473500 | 3.39489600  |
| C | -3.68832200 | 4.95773300 | 3.06243300  |
| H | -3.70627800 | 5.67688300 | 2.23491800  |
| H | -4.29366700 | 4.08438600 | 2.79265200  |
| H | -4.10367800 | 5.42540700 | 3.95347100  |
| H | 2.67489300  | 0.79840700 | -0.73264500 |
| H | 2.42949200  | 1.30460900 | 1.01539600  |
| C | 0.50385500  | 1.91716100 | -1.82232600 |
| H | 1.15830000  | 1.22490900 | -2.35751000 |
| H | -0.51538300 | 1.53259900 | -1.96463700 |
| C | 0.62448200  | 3.30845400 | -2.43745600 |
| H | 1.64626800  | 3.68656000 | -2.34644700 |
| H | 0.36997200  | 3.28940600 | -3.50012100 |
| H | -0.03456600 | 4.03068500 | -1.94944100 |

### TS<sub>1</sub><sup>o</sup> (Sextet)

0 6

|    |             |             |             |
|----|-------------|-------------|-------------|
| Fe | 0.57787200  | -0.14957000 | 0.29496000  |
| N  | 0.31704200  | -0.19867100 | 2.33232500  |
| C  | 1.40309200  | -0.37669200 | 3.29124700  |
| C  | -0.73297100 | 0.21644600  | 2.98098600  |
| C  | 0.86859300  | 0.29089200  | 4.55290900  |
| H  | 1.60911300  | -1.44542600 | 3.42780200  |
| H  | 1.00008500  | -0.28986500 | 5.46620600  |
| N  | -1.56938200 | -0.28988400 | 0.21039000  |
| C  | -2.44439800 | 0.19104000  | 1.12145700  |
| C  | -3.36262500 | -0.49959200 | -1.40428600 |
| C  | -3.82172400 | 0.42817200  | 0.77742600  |
| C  | -4.24533300 | 0.06583000  | -0.53050800 |
| H  | -3.68655700 | -0.78730100 | -2.39754700 |
| H  | -5.27997300 | 0.23608900  | -0.81183400 |
| C  | -2.04829300 | 0.48683400  | 2.47254000  |
| C  | -4.70516600 | 0.98614900  | 1.70576800  |
| C  | -4.28598700 | 1.30536600  | 2.99351700  |
| H  | -4.97845500 | 1.73784600  | 3.70743700  |
| C  | -2.98001600 | 1.04645600  | 3.36548300  |
| H  | -2.64416500 | 1.28409800  | 4.36731300  |
| H  | -5.73441900 | 1.15527600  | 1.40085000  |
| O  | -0.54429600 | 0.41674600  | 4.30690400  |
| C  | -2.01111900 | -0.66760700 | -1.03255100 |
| C  | -1.03669900 | -1.19264500 | -1.94590900 |
| C  | 1.29248200  | -1.53105500 | -2.40198000 |
| C  | 2.32894000  | -2.29780600 | -1.84914900 |
| C  | 1.41412500  | -1.10881900 | -3.73531300 |
| C  | 3.43078100  | -2.65359900 | -2.61193800 |
| C  | 2.52708200  | -1.45911700 | -4.48972800 |
| C  | 3.53895500  | -2.23669600 | -3.93688700 |
| H  | 4.21559500  | -3.25715700 | -2.16693000 |

|   |             |             |             |
|---|-------------|-------------|-------------|
| H | 2.60531700  | -1.11356900 | -5.51583700 |
| H | 4.40660100  | -2.50818900 | -4.52844100 |
| H | 2.24650300  | -2.60196500 | -0.81089800 |
| H | 0.64138300  | -0.48122000 | -4.16745000 |
| H | 2.32432500  | 0.08294500  | 2.92058500  |
| H | 1.27327300  | 1.29688200  | 4.70760900  |
| N | 0.23380200  | -1.13699500 | -1.57467700 |
| C | -1.49776400 | -1.82485100 | -3.22592400 |
| H | -0.74041100 | -2.50044300 | -3.62268800 |
| H | -2.41523500 | -2.39511000 | -3.07076300 |
| H | -1.70727000 | -1.08194500 | -4.00404100 |
| C | 2.11398500  | 1.30912700  | -0.28897300 |
| H | 2.23026100  | -0.29353500 | 0.14293600  |
| C | 0.83992800  | 1.89261100  | -0.56393000 |
| C | 0.09697500  | 2.61042200  | 0.46898200  |
| C | -1.21661600 | 3.07098700  | 0.24008800  |
| C | 0.62196500  | 2.87200800  | 1.75723200  |
| C | -1.96404100 | 3.72009300  | 1.21322200  |
| H | -1.68375000 | 2.88992300  | -0.72317800 |
| C | -0.11562500 | 3.50568900  | 2.73773300  |
| H | 1.63445400  | 2.56202400  | 1.99888700  |
| C | -1.42258100 | 3.93053900  | 2.48084700  |
| H | -2.97654800 | 4.02927100  | 0.98126300  |
| H | 0.30008200  | 3.69100300  | 3.72332800  |
| O | -2.07993100 | 4.51315600  | 3.52366100  |
| C | -3.39349300 | 4.96471900  | 3.27526900  |
| H | -3.41546400 | 5.73433500  | 2.49340000  |
| H | -4.05415200 | 4.14006100  | 2.97996200  |
| H | -3.74990400 | 5.39517900  | 4.21014400  |
| H | 2.74165700  | 1.08410600  | -1.14816200 |
| H | 2.69585300  | 1.64637800  | 0.56473100  |
| C | 0.38574000  | 1.99550300  | -2.00131800 |
| H | 0.96682100  | 1.28644800  | -2.59896300 |
| H | -0.66088900 | 1.67700700  | -2.11624400 |
| C | 0.55999600  | 3.39733800  | -2.58000600 |
| H | 1.61021200  | 3.70180600  | -2.54888300 |
| H | 0.22750300  | 3.44847100  | -3.62103300 |
| H | -0.00808900 | 4.13950200  | -2.01242200 |

Imaginary Frequency: -867.29

## II" (Sextet)

0 6

|    |             |             |             |
|----|-------------|-------------|-------------|
| Fe | -0.49355100 | -0.00059600 | -0.35943400 |
| N  | -0.45770800 | -0.06446800 | 1.71532500  |
| C  | 0.64607700  | 0.32106600  | 2.59391800  |
| C  | -1.56092400 | 0.00578300  | 2.40429100  |
| C  | -0.04656800 | 0.82392200  | 3.85907500  |
| H  | 1.29117200  | -0.54581100 | 2.78030500  |
| H  | 0.30616200  | 0.35450700  | 4.77876900  |
| N  | -2.25964200 | -1.14627600 | -0.18705100 |
| C  | -3.19547400 | -1.02554200 | 0.77400000  |

|   |             |             |             |
|---|-------------|-------------|-------------|
| C | -3.72158700 | -2.59583500 | -1.45003800 |
| C | -4.51039100 | -1.57789400 | 0.60137100  |
| C | -4.73533300 | -2.36758100 | -0.56370900 |
| H | -3.88483200 | -3.22960000 | -2.31428900 |
| H | -5.71653400 | -2.80709600 | -0.71475600 |
| C | -2.90200500 | -0.36872300 | 2.01557600  |
| C | -5.50105300 | -1.35025700 | 1.55960900  |
| C | -5.22342600 | -0.63020500 | 2.71694500  |
| H | -5.99966300 | -0.45570400 | 3.45342500  |
| C | -3.93629400 | -0.17303600 | 2.94674500  |
| H | -3.69806600 | 0.32592400  | 3.87795100  |
| H | -6.49355500 | -1.75756500 | 1.38781900  |
| O | -1.42554100 | 0.44768300  | 3.67624700  |
| C | -2.46715600 | -1.97107500 | -1.26599700 |
| C | -1.36910000 | -2.13451700 | -2.16817100 |
| C | 0.82521500  | -1.31980500 | -2.74696000 |
| C | 2.09294600  | -1.21237000 | -2.14751500 |
| C | 0.74046700  | -1.18658900 | -4.14458900 |
| C | 3.22996000  | -1.00901200 | -2.91273200 |
| C | 1.88310000  | -0.97199600 | -4.90285400 |
| C | 3.13431000  | -0.88860200 | -4.29746400 |
| H | 4.19789200  | -0.93684900 | -2.42671400 |
| H | 1.79333600  | -0.85586000 | -5.97855500 |
| H | 4.02260100  | -0.72037100 | -4.89635600 |
| H | 2.15586600  | -1.29670100 | -1.06460600 |
| H | -0.23251700 | -1.20731100 | -4.62382900 |
| H | 1.25653800  | 1.09471500  | 2.11651400  |
| H | -0.01115200 | 1.91156400  | 3.97070200  |
| N | -0.27850300 | -1.41723200 | -1.90655500 |
| C | -1.45614400 | -3.13711200 | -3.27930300 |
| H | -0.46158800 | -3.42491100 | -3.62130300 |
| H | -1.97474000 | -4.04058700 | -2.95208100 |
| H | -1.99940900 | -2.75386400 | -4.15062000 |
| C | 1.06495400  | 2.15068300  | -1.82720800 |
| H | 1.83725800  | 1.89177300  | -1.09249900 |
| C | -0.33946700 | 1.83881700  | -1.34990800 |
| C | -0.79127200 | 2.54829100  | -0.14688500 |
| C | -2.14093600 | 2.52728100  | 0.27442100  |
| C | 0.11374600  | 3.19986100  | 0.72818400  |
| C | -2.54826100 | 3.02561200  | 1.50576800  |
| H | -2.89293300 | 2.07408300  | -0.36514800 |
| C | -0.28253900 | 3.70054000  | 1.95348700  |
| H | 1.15414100  | 3.30300200  | 0.43741700  |
| C | -1.61269700 | 3.59246700  | 2.37096100  |
| H | -3.59214000 | 2.94522200  | 1.78707600  |
| H | 0.42658300  | 4.18933600  | 2.61532300  |
| O | -1.88405000 | 4.05337800  | 3.62817800  |
| C | -3.21538700 | 3.92728700  | 4.07722400  |
| H | -3.91056900 | 4.50421300  | 3.45472500  |
| H | -3.54027100 | 2.87946400  | 4.09017400  |
| H | -3.23460700 | 4.32213800  | 5.09199300  |

|   |             |            |             |
|---|-------------|------------|-------------|
| H | 1.29872500  | 1.58419500 | -2.73331900 |
| H | 1.21015400  | 3.21759500 | -2.06370600 |
| C | -1.34653300 | 1.72320700 | -2.49068100 |
| H | -0.92293900 | 1.05922500 | -3.25542500 |
| H | -2.26747800 | 1.22096500 | -2.16104700 |
| C | -1.71286900 | 3.06242600 | -3.12712400 |
| H | -0.82688600 | 3.56131700 | -3.53057700 |
| H | -2.42567200 | 2.94291300 | -3.94803900 |
| H | -2.16038300 | 3.73716100 | -2.39121400 |

### III'' (Sextet)

0 6

|    |             |             |             |
|----|-------------|-------------|-------------|
| Fe | 0.53987900  | -1.30443800 | -0.38278200 |
| N  | 0.38110200  | -1.82775000 | 1.62057300  |
| C  | 1.33927300  | -2.59450800 | 2.41626600  |
| C  | -0.34634300 | -1.12347000 | 2.43984400  |
| C  | 1.16749200  | -2.04594600 | 3.83132000  |
| H  | 1.10755000  | -3.66396800 | 2.34545400  |
| H  | 0.98902800  | -2.81048100 | 4.58907200  |
| N  | -1.49800500 | -0.77180300 | -0.22080800 |
| C  | -2.09185800 | -0.21500100 | 0.85206400  |
| C  | -3.46532900 | -0.33940600 | -1.55358700 |
| C  | -3.36476100 | 0.44092100  | 0.73739200  |
| C  | -4.02620400 | 0.35914600  | -0.52265300 |
| H  | -3.98931400 | -0.43316500 | -2.49801200 |
| H  | -4.99519300 | 0.83571900  | -0.63529700 |
| C  | -1.48870800 | -0.28549000 | 2.15213500  |
| C  | -3.91519600 | 1.10641100  | 1.83547500  |
| C  | -3.26980400 | 1.10685700  | 3.06762700  |
| H  | -3.70286200 | 1.62941900  | 3.91306500  |
| C  | -2.08966800 | 0.39834100  | 3.22261200  |
| H  | -1.61972800 | 0.33669700  | 4.19638700  |
| H  | -4.86635600 | 1.61647400  | 1.71052100  |
| O  | -0.01565700 | -1.22720600 | 3.74814000  |
| C  | -2.17944800 | -0.90715300 | -1.40626700 |
| C  | -1.51284000 | -1.62300800 | -2.45013700 |
| C  | 0.59139500  | -2.59692500 | -3.11760400 |
| C  | 1.47643300  | -3.58814000 | -2.65645800 |
| C  | 0.72696200  | -2.15500100 | -4.44596300 |
| C  | 2.43641000  | -4.13446800 | -3.49269200 |
| C  | 1.69843700  | -2.70017400 | -5.27423600 |
| C  | 2.55399800  | -3.69580400 | -4.80986500 |
| H  | 3.10290700  | -4.90323200 | -3.11443200 |
| H  | 1.79645800  | -2.33330600 | -6.29132800 |
| H  | 3.31077800  | -4.11624000 | -5.46296800 |
| H  | 1.38324300  | -3.91678600 | -1.62331600 |
| H  | 0.09625700  | -1.34983300 | -4.80735300 |
| H  | 2.35380700  | -2.44666100 | 2.03185900  |
| H  | 1.99361000  | -1.40437800 | 4.15136800  |
| N  | -0.27090600 | -2.02480900 | -2.18893100 |
| C  | -2.24431700 | -1.95645200 | -3.71535400 |

|   |             |             |             |
|---|-------------|-------------|-------------|
| H | -1.77842200 | -2.80242600 | -4.22171100 |
| H | -3.28432000 | -2.21777600 | -3.50963900 |
| H | -2.25823000 | -1.12204400 | -4.42588500 |
| C | 3.26051500  | -0.72978100 | -1.60030900 |
| H | 3.54403000  | -1.62987200 | -1.04135600 |
| C | 2.06529400  | -0.01076500 | -1.00678200 |
| C | 2.22409000  | 0.49959300  | 0.36008700  |
| C | 1.29178200  | 1.38763500  | 0.94427700  |
| C | 3.25645700  | 0.04360800  | 1.21817800  |
| C | 1.32104900  | 1.72238900  | 2.29250300  |
| H | 0.49454400  | 1.80257500  | 0.33418400  |
| C | 3.29472000  | 0.37251800  | 2.55948500  |
| H | 4.03854600  | -0.59348600 | 0.81822700  |
| C | 2.30993700  | 1.19153400  | 3.12035400  |
| H | 0.55507000  | 2.37959500  | 2.68815700  |
| H | 4.08839900  | 0.00621500  | 3.20423700  |
| O | 2.39920800  | 1.39733600  | 4.46824500  |
| C | 1.39346000  | 2.19243200  | 5.05670400  |
| H | 1.39968500  | 3.21524700  | 4.65991000  |
| H | 0.39651900  | 1.76079400  | 4.90360000  |
| H | 1.61239400  | 2.22304200  | 6.12307900  |
| H | 3.04545200  | -1.05645400 | -2.62188000 |
| H | 4.16233300  | -0.09729100 | -1.64381800 |
| C | 1.36772200  | 0.91193000  | -2.00212200 |
| H | 1.19781000  | 0.34970300  | -2.92968300 |
| H | 0.36224400  | 1.18821500  | -1.65301900 |
| C | 2.15079200  | 2.18511900  | -2.31611300 |
| H | 3.13372800  | 1.94901200  | -2.73410000 |
| H | 1.62860700  | 2.81749600  | -3.03977900 |
| H | 2.31498000  | 2.77782200  | -1.41123600 |

**TS<sub>2</sub>" (Sextet)**

0 6

|    |             |             |             |
|----|-------------|-------------|-------------|
| Fe | -0.56278600 | -2.44335000 | -0.37364000 |
| N  | -0.84645800 | -3.08559700 | 1.54273100  |
| C  | -0.14183400 | -4.09535400 | 2.33639900  |
| C  | -1.54305400 | -2.35779200 | 2.38874200  |
| C  | -0.13632500 | -3.48487200 | 3.72400000  |
| H  | -0.69794500 | -5.04198700 | 2.29885700  |
| H  | -0.29257700 | -4.19028900 | 4.53961200  |
| N  | -2.60042500 | -1.86164000 | -0.25925500 |
| C  | -3.21128900 | -1.34411700 | 0.82124400  |
| C  | -4.55263300 | -1.38339800 | -1.60530600 |
| C  | -4.47687300 | -0.67634400 | 0.71172400  |
| C  | -5.13330400 | -0.73524100 | -0.55528200 |
| H  | -5.06697400 | -1.44308900 | -2.55749700 |
| H  | -6.10900200 | -0.27097700 | -0.65924100 |
| C  | -2.61248700 | -1.44364900 | 2.12099600  |
| C  | -5.01456800 | -0.01881900 | 1.81756900  |
| C  | -4.36023000 | -0.02854600 | 3.05114800  |
| H  | -4.78323100 | 0.50311300  | 3.89615300  |

|   |             |             |             |
|---|-------------|-------------|-------------|
| C | -3.19429300 | -0.75007100 | 3.20408600  |
| H | -2.71462300 | -0.81584200 | 4.17284100  |
| H | -5.95921500 | 0.50532600  | 1.70159500  |
| O | -1.26899000 | -2.59052800 | 3.69242600  |
| C | -3.25422600 | -1.93060700 | -1.47233100 |
| C | -2.49461100 | -2.46963000 | -2.53672700 |
| C | -0.38464500 | -3.25596300 | -3.30741100 |
| C | -0.17616500 | -4.62922000 | -3.47159900 |
| C | 0.31104900  | -2.36095800 | -4.12529200 |
| C | 0.72264800  | -5.09413700 | -4.42364500 |
| C | 1.21600100  | -2.83090400 | -5.07043600 |
| C | 1.42850300  | -4.19780900 | -5.22144200 |
| H | 0.87845200  | -6.16230300 | -4.53855900 |
| H | 1.75955300  | -2.12471300 | -5.69043400 |
| H | 2.13757900  | -4.56248900 | -5.95678600 |
| H | -0.71609000 | -5.31944300 | -2.82974000 |
| H | 0.14335800  | -1.29603500 | -3.99282900 |
| H | 0.86394700  | -4.27783900 | 1.95691800  |
| H | 0.76574100  | -2.89309000 | 3.91590400  |
| N | -1.21492900 | -2.77907400 | -2.26866100 |
| C | -3.05008100 | -2.62674100 | -3.91564800 |
| H | -2.70947000 | -1.82043400 | -4.57729600 |
| H | -2.71105500 | -3.56114600 | -4.36972700 |
| H | -4.13878500 | -2.62562800 | -3.92466300 |
| C | 1.96504100  | -3.52873300 | -0.86489100 |
| H | 1.25197700  | -4.18261300 | -0.33678200 |
| C | 1.99689000  | -2.10631300 | -0.34388400 |
| C | 2.42930000  | -1.95922700 | 1.06634600  |
| C | 2.31992500  | -0.72496000 | 1.72814700  |
| C | 2.98392100  | -3.01690800 | 1.81251500  |
| C | 2.71118000  | -0.54976700 | 3.05009600  |
| H | 1.91734100  | 0.13075300  | 1.19546000  |
| C | 3.38933000  | -2.85753300 | 3.12734100  |
| H | 3.12268600  | -3.98898100 | 1.34899400  |
| C | 3.25021400  | -1.62176800 | 3.76337900  |
| H | 2.59466000  | 0.42351900  | 3.51171300  |
| H | 3.82913000  | -3.67884300 | 3.68389100  |
| O | 3.65748800  | -1.56636700 | 5.06173800  |
| C | 3.52902300  | -0.32504600 | 5.72174400  |
| H | 4.12340100  | 0.45707700  | 5.23415400  |
| H | 2.48343000  | 0.00309800  | 5.76888100  |
| H | 3.90139900  | -0.47843500 | 6.73321700  |
| H | 1.71560300  | -3.55607200 | -1.92684700 |
| H | 2.93968200  | -4.03059300 | -0.76937200 |
| C | 2.69070500  | -1.16305700 | -1.32392200 |
| H | 2.09435200  | -1.10583900 | -2.24643900 |
| H | 2.69576900  | -0.14897700 | -0.90982700 |
| C | 4.11655300  | -1.57657500 | -1.66543300 |
| H | 4.14281800  | -2.52692800 | -2.20684300 |
| H | 4.60476000  | -0.83083200 | -2.29794000 |
| H | 4.72222700  | -1.69225800 | -0.76095600 |

|    |             |             |             |
|----|-------------|-------------|-------------|
| Si | -0.37642200 | 0.30740300  | -0.52797200 |
| H  | 0.69206200  | -1.18840300 | -0.40410200 |
| H  | 0.77773300  | 1.22637100  | -0.35687700 |
| H  | -1.30510800 | 0.64602500  | 0.57062700  |
| C  | -1.14726600 | 0.77676400  | -2.21113900 |
| H  | -1.53947200 | 1.79673100  | -2.17855200 |
| H  | -0.39087200 | 0.74264900  | -2.99915000 |
| H  | -1.96458700 | 0.11147900  | -2.49239800 |

Imaginary Frequency: -1301.77

#### IV" (Sextet)

0 6

|    |             |             |             |
|----|-------------|-------------|-------------|
| Fe | 0.57152600  | 0.14532900  | 0.47887100  |
| N  | 0.43123300  | -0.06733900 | 2.53235000  |
| C  | 1.51177200  | 0.28042500  | 3.46180500  |
| C  | -0.66295100 | -0.18025100 | 3.22594100  |
| C  | 0.76918700  | 0.67532100  | 4.72735400  |
| H  | 2.16447000  | -0.59093900 | 3.60334900  |
| H  | 1.18261700  | 0.26809500  | 5.64995900  |
| N  | -1.32731500 | -0.87492900 | 0.43977700  |
| C  | -2.24428800 | -1.00957500 | 1.43054400  |
| C  | -2.83522800 | -2.00789900 | -1.09101700 |
| C  | -3.54309400 | -1.56781900 | 1.17200200  |
| C  | -3.80192400 | -2.06936800 | -0.13337100 |
| H  | -3.02307300 | -2.39932000 | -2.08358700 |
| H  | -4.77307000 | -2.50644900 | -0.34327000 |
| C  | -1.96869900 | -0.60402800 | 2.77936200  |
| C  | -4.51240400 | -1.62576400 | 2.17896900  |
| C  | -4.24394600 | -1.16611300 | 3.45929000  |
| H  | -5.00325300 | -1.20502800 | 4.23168400  |
| C  | -2.98172000 | -0.67585000 | 3.74910800  |
| H  | -2.74593200 | -0.34757700 | 4.75323300  |
| H  | -5.48474900 | -2.04350100 | 1.93313100  |
| O  | -0.54880600 | 0.10863300  | 4.54041300  |
| C  | -1.59603600 | -1.38985900 | -0.80926300 |
| C  | -0.59168600 | -1.24168500 | -1.81518500 |
| C  | 1.47256700  | -0.12261200 | -2.37384300 |
| C  | 2.80630000  | -0.09696300 | -1.93308800 |
| C  | 1.18024300  | 0.40704600  | -3.64175800 |
| C  | 3.81157200  | 0.41695600  | -2.73791600 |
| C  | 2.19236700  | 0.91832300  | -4.44111900 |
| C  | 3.51312300  | 0.92389800  | -3.99955500 |
| H  | 4.83391500  | 0.42718000  | -2.37403400 |
| H  | 1.94377800  | 1.33384500  | -5.41264700 |
| H  | 4.29832000  | 1.33159700  | -4.62666800 |
| H  | 3.03801400  | -0.48689300 | -0.94502600 |
| H  | 0.14902100  | 0.45692600  | -3.97367500 |
| H  | 2.13120000  | 1.08805800  | 3.06194100  |
| H  | 0.65851500  | 1.75994400  | 4.83164100  |
| N  | 0.49114100  | -0.54632200 | -1.47833000 |
| C  | -0.75684000 | -1.90614500 | -3.14882200 |



|    |             |             |             |
|----|-------------|-------------|-------------|
| H  | 0.20089700  | -1.98465400 | -3.66301100 |
| H  | -1.16280600 | -2.91344200 | -3.03507400 |
| H  | -1.43724600 | -1.35935800 | -3.81108200 |
| C  | 4.02331800  | -1.36256400 | 6.34136800  |
| H  | 3.01504800  | -1.42484000 | 5.92167800  |
| C  | 4.99104500  | -0.68409500 | 5.37900700  |
| C  | 4.55353200  | 0.70093700  | 4.94968300  |
| C  | 4.97508500  | 1.20974300  | 3.72102200  |
| C  | 3.76582600  | 1.53613700  | 5.74913500  |
| C  | 4.63544200  | 2.48736400  | 3.28919600  |
| H  | 5.58366900  | 0.58379900  | 3.07147300  |
| C  | 3.40714800  | 2.81110000  | 5.33622500  |
| H  | 3.42188200  | 1.18930800  | 6.71973900  |
| C  | 3.84069400  | 3.30029600  | 4.10107400  |
| H  | 4.97177000  | 2.83189400  | 2.31956000  |
| H  | 2.79649700  | 3.45504700  | 5.96048800  |
| O  | 3.44503300  | 4.55783500  | 3.78383700  |
| C  | 3.92424800  | 5.09944300  | 2.56580200  |
| H  | 5.01947000  | 5.15702400  | 2.55980000  |
| H  | 3.58567600  | 4.51315800  | 1.70426800  |
| H  | 3.51085200  | 6.10439200  | 2.50144100  |
| H  | 4.35167000  | -2.38147900 | 6.56368900  |
| H  | 3.94646200  | -0.83678500 | 7.29685400  |
| C  | 6.42799600  | -0.66575100 | 5.93695200  |
| H  | 6.74080900  | -1.70075800 | 6.12519100  |
| H  | 7.09665100  | -0.28551400 | 5.15558800  |
| C  | 6.60681300  | 0.16311000  | 7.19770000  |
| H  | 6.00948400  | -0.22055400 | 8.02986000  |
| H  | 7.64894800  | 0.16225100  | 7.52485500  |
| H  | 6.31457300  | 1.20463800  | 7.03553900  |
| Si | 1.79439400  | 2.37314300  | 0.45871600  |
| H  | 5.02474600  | -1.29789500 | 4.46730200  |
| H  | 3.27335400  | 2.18864500  | 0.57811000  |
| H  | 1.47576500  | 3.22274300  | 1.64736800  |
| C  | 1.56151900  | 3.47286600  | -1.10149500 |
| H  | 2.10331300  | 4.41963600  | -1.02034000 |
| H  | 1.93091900  | 2.95115700  | -1.98845500 |
| H  | 0.50822500  | 3.70512600  | -1.27387000 |

**TS<sub>3</sub><sup>o</sup> (Sextet)**

0 6

|    |             |             |             |
|----|-------------|-------------|-------------|
| Fe | 0.17562100  | -2.04153300 | -0.48688200 |
| N  | 0.43219600  | -2.16361100 | 1.54864700  |
| C  | 1.61023200  | -2.79653700 | 2.14669800  |
| C  | -0.10341200 | -1.39273900 | 2.44719400  |
| C  | 1.77329100  | -2.07146800 | 3.47778900  |
| H  | 1.43018600  | -3.87220900 | 2.26154600  |
| H  | 1.90749200  | -2.72596400 | 4.33967000  |
| N  | -1.54515600 | -0.86390900 | -0.07786600 |
| C  | -1.97203200 | -0.32992500 | 1.09550400  |
| C  | -3.48748600 | 0.07369200  | -1.19959400 |

|   |             |             |             |
|---|-------------|-------------|-------------|
| C | -3.14993900 | 0.49156900  | 1.15327100  |
| C | -3.89609400 | 0.66939300  | -0.04586400 |
| H | -4.05664600 | 0.20177400  | -2.11271400 |
| H | -4.79396200 | 1.27873100  | -0.01659200 |
| C | -1.27180800 | -0.54995000 | 2.32921700  |
| C | -3.55519100 | 1.08419000  | 2.35369200  |
| C | -2.84267000 | 0.88625400  | 3.52705700  |
| H | -3.16428500 | 1.34622800  | 4.45454400  |
| C | -1.72307800 | 0.07157300  | 3.50563600  |
| H | -1.17478300 | -0.11874800 | 4.41972400  |
| H | -4.44937600 | 1.70132400  | 2.34632900  |
| O | 0.51908700  | -1.37359000 | 3.64590300  |
| C | -2.29550900 | -0.68698500 | -1.22423300 |
| C | -1.80435800 | -1.26915000 | -2.42877300 |
| C | 0.13672800  | -2.30871600 | -3.43150900 |
| C | 0.89362800  | -3.48682200 | -3.31106100 |
| C | 0.31312400  | -1.52043900 | -4.58149000 |
| C | 1.77058100  | -3.87568000 | -4.31156300 |
| C | 1.19773300  | -1.91355100 | -5.57517300 |
| C | 1.92760100  | -3.09359700 | -5.45279600 |
| H | 2.33915600  | -4.79315400 | -4.19803400 |
| H | 1.32906500  | -1.28351000 | -6.44940300 |
| H | 2.61850800  | -3.39366600 | -6.23291500 |
| H | 0.77421000  | -4.09276000 | -2.41560800 |
| H | -0.21167100 | -0.57461400 | -4.66405500 |
| H | 2.47223100  | -2.66978000 | 1.48471100  |
| H | 2.56944400  | -1.31981000 | 3.46058600  |
| N | -0.63537700 | -1.91088300 | -2.34282500 |
| C | -2.60923700 | -1.20473200 | -3.69170200 |
| H | -2.25300100 | -1.93823200 | -4.41507300 |
| H | -3.66349500 | -1.41294800 | -3.49481900 |
| H | -2.56325700 | -0.22230400 | -4.17515800 |
| C | 5.04782300  | -1.73547900 | 0.21458100  |
| H | 4.95216800  | -2.25797400 | 1.17690000  |
| C | 3.93721900  | -0.75562300 | -0.02827000 |
| C | 3.54735400  | 0.10233900  | 1.07535100  |
| C | 2.23883500  | 0.61094000  | 1.20825200  |
| C | 4.42830600  | 0.36900500  | 2.14921500  |
| C | 1.83005600  | 1.33238400  | 2.32331400  |
| H | 1.49959200  | 0.40138300  | 0.44118100  |
| C | 4.03591300  | 1.09068100  | 3.26052400  |
| H | 5.44787800  | -0.00102400 | 2.10399000  |
| C | 2.72795900  | 1.57633500  | 3.36342000  |
| H | 0.80272200  | 1.67447900  | 2.38168000  |
| H | 4.72526500  | 1.28898000  | 4.07458100  |
| O | 2.42551700  | 2.25265200  | 4.50598400  |
| C | 1.08512300  | 2.66709800  | 4.66313500  |
| H | 0.78655600  | 3.38460200  | 3.88881200  |
| H | 0.39526100  | 1.81442300  | 4.63616100  |
| H | 1.02765000  | 3.14948900  | 5.63773200  |
| H | 5.08457900  | -2.48857400 | -0.57598300 |

|   |            |             |             |
|---|------------|-------------|-------------|
| H | 6.03306000 | -1.25133500 | 0.23373400  |
| C | 3.18735800 | -0.86877300 | -1.19045400 |
| H | 3.54577300 | -1.62186700 | -1.89205600 |
| H | 1.86841700 | -1.79228000 | -0.76503400 |
| C | 2.47212900 | 0.27944600  | -1.86389800 |
| H | 2.88301500 | 0.42365800  | -2.86821800 |
| H | 1.39588900 | 0.11026500  | -1.98954900 |
| H | 2.60244700 | 1.21603300  | -1.31854900 |

Imaginary frequency:-1301.77

### V'' (Sextet)

0 6

|    |             |             |             |
|----|-------------|-------------|-------------|
| Fe | -0.03016400 | -2.01454200 | -0.34672700 |
| N  | 0.16669000  | -2.22904600 | 1.69646700  |
| C  | 1.03699800  | -3.25179600 | 2.27339200  |
| C  | -0.50906800 | -1.68409000 | 2.65597200  |
| C  | 0.91909300  | -3.01501700 | 3.77565700  |
| H  | 0.68051000  | -4.23952700 | 1.95910900  |
| H  | 0.69441200  | -3.90919100 | 4.35911700  |
| N  | -1.44901000 | -0.43693200 | 0.13928600  |
| C  | -2.01786400 | -0.12725800 | 1.33203700  |
| C  | -2.89380000 | 1.17447600  | -0.96670500 |
| C  | -3.08340700 | 0.83697000  | 1.41651300  |
| C  | -3.53102300 | 1.44305600  | 0.20864600  |
| H  | -3.19646400 | 1.67456500  | -1.87909100 |
| H  | -4.35796500 | 2.14520300  | 0.25124200  |
| C  | -1.56810600 | -0.70551200 | 2.56842900  |
| C  | -3.64033500 | 1.18958700  | 2.64943000  |
| C  | -3.17613600 | 0.63056700  | 3.83075200  |
| H  | -3.60583700 | 0.91499900  | 4.78431000  |
| C  | -2.15321500 | -0.30017600 | 3.77888500  |
| H  | -1.78022300 | -0.74272900 | 4.69348900  |
| H  | -4.44378900 | 1.92115100  | 2.66043600  |
| O  | -0.19637000 | -2.11130300 | 3.90459300  |
| C  | -1.82239600 | 0.25541700  | -0.99510100 |
| C  | -1.04942300 | 0.03550500  | -2.18101300 |
| C  | 0.82144400  | -1.12149600 | -3.14236800 |
| C  | 1.00220100  | -2.42846800 | -3.61580000 |
| C  | 1.65154900  | -0.10145500 | -3.63010000 |
| C  | 1.97228200  | -2.69694900 | -4.57116300 |
| C  | 2.62746400  | -0.38277700 | -4.57796700 |
| C  | 2.79003800  | -1.67965100 | -5.05714600 |
| H  | 2.09560700  | -3.71231400 | -4.93492400 |
| H  | 3.26704000  | 0.41566300  | -4.94119800 |
| H  | 3.55132300  | -1.89586800 | -5.79897400 |
| H  | 0.37659100  | -3.21596600 | -3.20711900 |
| H  | 1.53479500  | 0.90695000  | -3.24186600 |
| H  | 2.06011300  | -3.14274900 | 1.90009500  |
| H  | 1.79819100  | -2.52263900 | 4.20371100  |
| N  | -0.10962800 | -0.89593500 | -2.11931400 |
| C  | -1.34906900 | 0.80849900  | -3.43086400 |

|   |             |             |             |
|---|-------------|-------------|-------------|
| H | -0.83910800 | 0.37698700  | -4.29118900 |
| H | -2.42078500 | 0.80693800  | -3.64233200 |
| H | -1.04138300 | 1.85741100  | -3.35608900 |
| C | 5.37360900  | -1.79847000 | 2.00210600  |
| H | 5.00301100  | -2.24463500 | 2.93302800  |
| C | 4.29929300  | -1.72422000 | 0.95108300  |
| C | 3.21093600  | -0.75916400 | 1.19723700  |
| C | 2.49120300  | -0.13249200 | 0.16861000  |
| C | 2.88441900  | -0.37892200 | 2.51307900  |
| C | 1.50658900  | 0.81778200  | 0.42877900  |
| H | 2.73550000  | -0.33895800 | -0.86856500 |
| C | 1.89611100  | 0.54619500  | 2.78933800  |
| H | 3.42604300  | -0.81662200 | 3.34555800  |
| C | 1.20163700  | 1.16489400  | 1.74629600  |
| H | 0.98689200  | 1.28119200  | -0.40272100 |
| H | 1.64713000  | 0.82072900  | 3.80939000  |
| O | 0.27613800  | 2.08464100  | 2.11397400  |
| C | -0.29188000 | 2.87680600  | 1.08841400  |
| H | 0.47837200  | 3.45805600  | 0.56643100  |
| H | -0.84025800 | 2.27172100  | 0.36015700  |
| H | -0.98874700 | 3.55344400  | 1.58078700  |
| H | 6.20868400  | -2.41410800 | 1.66476000  |
| H | 5.75909300  | -0.80820900 | 2.26502200  |
| C | 4.38105600  | -2.54528400 | -0.11492700 |
| H | 5.26952700  | -3.17403800 | -0.16101400 |
| H | -0.00970500 | -3.62787500 | -0.76229100 |
| C | 3.40712500  | -2.74709900 | -1.22300100 |
| H | 3.47439800  | -3.76206100 | -1.62276100 |
| H | 2.36774700  | -2.60666800 | -0.90071500 |
| H | 3.57341400  | -2.06986100 | -2.07079700 |

### I<sub>6</sub>'

0 2

|    |             |             |             |
|----|-------------|-------------|-------------|
| Fe | 0.07293900  | 0.03153700  | 0.09166700  |
| N  | -0.03549000 | 0.05422300  | 2.02796400  |
| C  | 1.08964700  | 0.06075300  | 2.98208000  |
| C  | -1.14444200 | -0.00687500 | 2.71613600  |
| C  | 0.39369800  | 0.38736700  | 4.29951900  |
| H  | 0.72197000  | -0.21763700 | 5.14749500  |
| N  | -1.81432900 | -0.62949800 | -0.06510700 |
| C  | -2.78186900 | -0.59780100 | 0.89336500  |
| C  | -3.44396900 | -1.43587900 | -1.67713700 |
| C  | -4.13755600 | -0.94862000 | 0.58475900  |
| C  | -4.43258600 | -1.38289100 | -0.73729900 |
| H  | -3.66006300 | -1.76856900 | -2.68569600 |
| H  | -5.45176900 | -1.66731800 | -0.97876700 |
| C  | -2.48408200 | -0.23015700 | 2.24610000  |
| C  | -5.13540500 | -0.86513100 | 1.56572200  |
| C  | -4.83415800 | -0.46392700 | 2.85844100  |
| H  | -5.61354300 | -0.39525600 | 3.60895000  |
| C  | -3.52423400 | -0.16451600 | 3.19157700  |

|   |             |             |             |
|---|-------------|-------------|-------------|
| H | -3.27296400 | 0.12196600  | 4.20480600  |
| H | -6.15371900 | -1.12077700 | 1.28750600  |
| O | -0.99331300 | 0.08873500  | 4.05987200  |
| C | -2.13587400 | -1.03830800 | -1.34140900 |
| C | -1.06032900 | -1.00162600 | -2.27714200 |
| C | 1.21670700  | -0.46992300 | -2.68909800 |
| C | 1.98848400  | -1.64382300 | -2.79534500 |
| C | 1.56312800  | 0.69771700  | -3.39521800 |
| C | 3.11510800  | -1.62311100 | -3.61685500 |
| C | 2.69761100  | 0.66628600  | -4.20683300 |
| C | 3.46937700  | -0.48083300 | -4.32038600 |
| H | 3.72338400  | -2.51683200 | -3.71058700 |
| H | 2.98318500  | 1.55654000  | -4.75731800 |
| H | 4.34846200  | -0.48473000 | -4.95672100 |
| H | 1.79072900  | 0.85433100  | 2.71040500  |
| H | 0.47177100  | 1.44649000  | 4.56922300  |
| N | 0.07423900  | -0.46327100 | -1.83729800 |
| C | -1.22292600 | -1.57056100 | -3.65352500 |
| H | -0.40319500 | -1.27573800 | -4.30825100 |
| H | -1.24762000 | -2.66650600 | -3.62697700 |
| H | -2.15743000 | -1.24384900 | -4.11588700 |
| C | 1.68150900  | 1.23575900  | 0.06557600  |
| H | 0.95617000  | 2.40338100  | 1.74089000  |
| C | 1.50867600  | 2.57521200  | 0.80405900  |
| C | 2.84347200  | 3.16668700  | 1.20030800  |
| C | 3.16711000  | 3.40012100  | 2.53365600  |
| C | 3.81421300  | 3.48376600  | 0.23969600  |
| C | 4.40193600  | 3.92483700  | 2.91912800  |
| H | 2.43028100  | 3.17540900  | 3.30343400  |
| C | 5.04126900  | 4.01091600  | 0.59667200  |
| H | 3.60188100  | 3.30115100  | -0.81066900 |
| C | 5.34612500  | 4.23408300  | 1.94341700  |
| H | 4.60961300  | 4.08976000  | 3.96968600  |
| H | 5.79050100  | 4.25703600  | -0.14813400 |
| C | 0.66614800  | 3.58739400  | 0.01446000  |
| H | 0.73051700  | 4.56244500  | 0.51340900  |
| C | -0.79741300 | 3.19812500  | -0.12153300 |
| H | -1.36530100 | 3.94734800  | -0.68143900 |
| H | -0.92787700 | 2.24079600  | -0.64125700 |
| H | -1.27168100 | 3.09302700  | 0.86102800  |
| O | 6.58251300  | 4.75115100  | 2.19517200  |
| C | 6.91408900  | 4.98783500  | 3.54427500  |
| H | 6.23496500  | 5.71359300  | 4.00920100  |
| H | 6.89923800  | 4.06336100  | 4.13534000  |
| H | 7.92426800  | 5.39443100  | 3.54402300  |
| H | 2.09965400  | 1.41172900  | -0.93542200 |
| H | 2.43867800  | 0.62620900  | 0.58977100  |
| H | 1.11608900  | 3.73492800  | -0.97523400 |
| C | 0.70943100  | 1.94358200  | -3.27931200 |
| H | 0.37522700  | 1.98281200  | -2.23628100 |
| C | 1.47204700  | 3.22822200  | -3.57876700 |

|   |             |             |             |
|---|-------------|-------------|-------------|
| H | 0.85949100  | 4.09869400  | -3.32690400 |
| H | 2.40243800  | 3.29576600  | -3.00733100 |
| H | 1.72654700  | 3.31579900  | -4.64018700 |
| C | -0.54346300 | 1.87109900  | -4.15432200 |
| H | -1.12611100 | 2.79325600  | -4.06445900 |
| H | -0.27972900 | 1.74546600  | -5.21015000 |
| H | -1.19781500 | 1.04537400  | -3.87060600 |
| C | 1.63329500  | -2.87963900 | -1.99073200 |
| H | 0.54097200  | -2.92544100 | -1.90597700 |
| C | 2.09034100  | -4.18334500 | -2.63296500 |
| H | 3.18010600  | -4.28091500 | -2.63309300 |
| H | 1.69593500  | -5.03859700 | -2.07803900 |
| H | 1.74932600  | -4.26763300 | -3.66878400 |
| C | 2.18393900  | -2.74815000 | -0.57120600 |
| H | 1.80855100  | -1.83784600 | -0.09051700 |
| H | 1.89641800  | -3.60131800 | 0.05133500  |
| H | 3.27724800  | -2.68444500 | -0.58105200 |
| C | 1.86114900  | -1.26575700 | 2.95354000  |
| H | 2.22402400  | -1.36731900 | 1.92267700  |
| C | 3.07423400  | -1.18262400 | 3.87008100  |
| H | 2.78226700  | -1.09492900 | 4.92273400  |
| H | 3.69313500  | -2.07908600 | 3.78610000  |
| H | 3.70209400  | -0.31985300 | 3.62590400  |
| C | 0.98087200  | -2.46647200 | 3.26762500  |
| H | 0.15039400  | -2.55082900 | 2.56051300  |
| H | 1.55546300  | -3.39469100 | 3.21388400  |
| H | 0.55706900  | -2.40733000 | 4.27653100  |

### I'''(2a)

0 2

|    |             |             |             |
|----|-------------|-------------|-------------|
| Fe | 0.09586900  | 0.02684400  | -0.09563300 |
| N  | 0.26029700  | 0.08854100  | 1.89498600  |
| C  | 1.42126600  | 0.05409800  | 2.83964200  |
| C  | -0.75924500 | 0.50935000  | 2.60076900  |
| C  | 0.96356700  | 1.02000500  | 3.91306100  |
| H  | 1.28002200  | 0.76404000  | 4.92405100  |
| N  | -1.83542800 | -0.45373300 | 0.08424600  |
| C  | -2.67274700 | -0.06443900 | 1.07517600  |
| C  | -3.70555800 | -1.47620300 | -1.07533200 |
| C  | -4.09055400 | -0.24847400 | 0.96656000  |
| C  | -4.57890400 | -0.98205200 | -0.15284400 |
| H  | -4.06161300 | -2.05894200 | -1.91770300 |
| H  | -5.64735500 | -1.14953700 | -0.24394100 |
| C  | -2.15959900 | 0.54192800  | 2.26324400  |
| C  | -4.93913500 | 0.28667000  | 1.94162500  |
| C  | -4.42785600 | 0.96882200  | 3.03760000  |
| H  | -5.09655300 | 1.39271200  | 3.77844600  |
| C  | -3.05669000 | 1.07367900  | 3.20562200  |
| H  | -2.64979100 | 1.54570700  | 4.09079700  |
| H  | -6.01110100 | 0.15771600  | 1.82226400  |
| O  | -0.46978000 | 0.92694100  | 3.85685300  |

|   |             |             |             |
|---|-------------|-------------|-------------|
| C | -2.32471400 | -1.19740700 | -0.96243200 |
| C | -1.35512400 | -1.61361400 | -1.90940500 |
| C | 0.93257100  | -1.43545500 | -2.62395800 |
| C | 1.99988900  | -2.28577700 | -2.24391500 |
| C | 0.95232200  | -0.78635500 | -3.88107800 |
| C | 3.10012700  | -2.40326200 | -3.08756500 |
| C | 2.09143500  | -0.92923400 | -4.68011800 |
| C | 3.16350600  | -1.71110400 | -4.29045500 |
| H | 3.92459200  | -3.04714800 | -2.80137000 |
| H | 2.12388200  | -0.41899800 | -5.63912600 |
| H | 4.03620800  | -1.80185300 | -4.92905900 |
| H | 1.24200500  | 2.05707600  | 3.68913200  |
| N | -0.10423000 | -1.21217000 | -1.67436800 |
| C | -1.74641600 | -2.49710500 | -3.05285900 |
| H | -0.86877000 | -2.85510800 | -3.59192000 |
| H | -2.29717400 | -3.37120900 | -2.69196500 |
| H | -2.39700600 | -1.98595500 | -3.77009500 |
| C | -0.30164100 | 1.75480000  | -1.16172300 |
| H | 1.57484900  | -0.16215500 | -0.14733600 |
| C | 0.98261900  | 2.07357800  | -0.69319600 |
| C | 2.15356500  | 1.95664500  | -1.65383600 |
| H | -1.19336500 | 2.21568800  | -0.74689200 |
| H | -0.41691400 | 1.39450600  | -2.17720900 |
| C | 1.90044200  | -3.11073300 | -0.97721200 |
| H | 1.47693400  | -2.45448700 | -0.20523500 |
| C | 3.24101600  | -3.63981200 | -0.48269800 |
| H | 3.99733300  | -2.85323300 | -0.41790400 |
| H | 3.13118800  | -4.07887600 | 0.51268900  |
| H | 3.63219500  | -4.42595000 | -1.13714800 |
| C | 0.92377100  | -4.27477900 | -1.16755700 |
| H | -0.08004100 | -3.92891500 | -1.42060700 |
| H | 1.26339500  | -4.93892900 | -1.96969000 |
| H | 0.84641400  | -4.87014400 | -0.25289600 |
| C | -0.20912100 | 0.00781500  | -4.46448000 |
| H | -1.01736300 | 0.04687100  | -3.72532300 |
| C | 0.15497900  | 1.44693200  | -4.83821300 |
| H | 0.96978700  | 1.46948700  | -5.56820100 |
| H | -0.70374900 | 1.94551200  | -5.29729500 |
| H | 0.46416500  | 2.04806300  | -3.98258200 |
| C | -0.74456700 | -0.68787900 | -5.72322300 |
| H | -0.94569600 | -1.74873400 | -5.56750300 |
| H | -1.66814200 | -0.21245600 | -6.06698300 |
| H | -0.01844500 | -0.61418600 | -6.53887700 |
| C | 1.11195200  | 2.96054100  | 0.48178100  |
| C | 0.01528400  | 3.25017400  | 1.32144000  |
| C | 2.31360300  | 3.60870400  | 0.79769400  |
| C | 0.11785500  | 4.09821900  | 2.40514100  |
| H | -0.94920100 | 2.79442400  | 1.12675400  |
| C | 2.43902700  | 4.46171400  | 1.89167500  |
| H | 3.18613600  | 3.46163800  | 0.17222400  |
| C | 1.33992500  | 4.70510100  | 2.71294200  |

|   |             |             |             |
|---|-------------|-------------|-------------|
| H | -0.73744700 | 4.29484100  | 3.04368300  |
| H | 3.39565000  | 4.93163800  | 2.08725900  |
| O | 1.35434300  | 5.49759100  | 3.81981900  |
| C | 2.58521200  | 6.09674500  | 4.16100500  |
| H | 2.40465600  | 6.66940200  | 5.06916600  |
| H | 3.36045500  | 5.34481000  | 4.35672400  |
| H | 2.94052900  | 6.77299000  | 3.37395200  |
| H | 1.78999800  | 1.45284500  | -2.55267800 |
| H | 2.40478300  | 2.98121500  | -1.97301800 |
| C | 3.43861600  | 1.24360700  | -1.24404500 |
| H | 4.19843300  | 1.37785300  | -2.02018300 |
| H | 3.86560200  | 1.60425300  | -0.30478800 |
| H | 3.26679100  | 0.17021500  | -1.13339100 |
| H | 1.43537000  | -0.96514800 | 3.26092500  |
| C | 2.79361400  | 0.34747700  | 2.22834200  |
| H | 2.61508600  | 1.01901900  | 1.38363000  |
| C | 3.43403800  | -0.93086400 | 1.71238400  |
| H | 4.34876700  | -0.72041000 | 1.15027700  |
| H | 3.70119200  | -1.59637100 | 2.54228900  |
| H | 2.75311600  | -1.46797100 | 1.05335300  |
| C | 3.73693900  | 1.04003100  | 3.20835500  |
| H | 4.71172000  | 1.19722900  | 2.73745000  |
| H | 3.37558400  | 2.02136200  | 3.52745900  |
| H | 3.90893900  | 0.43132000  | 4.10406100  |

**I'''(2b)**

0 2

|    |             |             |             |
|----|-------------|-------------|-------------|
| Fe | 0.08924500  | -0.11882900 | -0.03577400 |
| N  | 0.30247200  | -0.15564400 | 1.93632700  |
| C  | 1.48312900  | -0.02545800 | 2.84469700  |
| C  | -0.75369100 | -0.04045600 | 2.70472500  |
| C  | 0.87517400  | 0.75746300  | 3.99180300  |
| H  | 1.70022200  | -1.04743400 | 3.20104200  |
| H  | 1.29144600  | 0.53613100  | 4.97403900  |
| N  | -1.69060200 | -1.01407200 | 0.14282400  |
| C  | -2.55809500 | -0.88208300 | 1.17179100  |
| C  | -3.35575600 | -2.26379200 | -1.09638700 |
| C  | -3.91521300 | -1.33356800 | 1.06099000  |
| C  | -4.28577300 | -2.02573400 | -0.12730500 |
| H  | -3.61798600 | -2.81975500 | -1.98971100 |
| H  | -5.30756700 | -2.37642500 | -0.23186700 |
| C  | -2.13675900 | -0.29553800 | 2.40729800  |
| C  | -4.81824800 | -1.08570200 | 2.10018800  |
| C  | -4.41356000 | -0.43442600 | 3.25868500  |
| H  | -5.12636200 | -0.23879600 | 4.05204700  |
| C  | -3.08907100 | -0.06297900 | 3.41623100  |
| H  | -2.75719800 | 0.39509500  | 4.33913200  |
| H  | -5.84671600 | -1.41481300 | 1.98267100  |
| O  | -0.49891200 | 0.34228800  | 3.98334300  |
| C  | -2.04424200 | -1.75917700 | -0.95429700 |
| C  | -0.99835900 | -1.97246400 | -1.89114400 |



|   |             |             |             |
|---|-------------|-------------|-------------|
| C | 1.30436200  | -1.56464600 | -2.43492200 |
| C | 2.38325500  | -2.33253600 | -1.93100000 |
| C | 1.39749400  | -0.93959500 | -3.69583900 |
| C | 3.56331100  | -2.38949100 | -2.66762500 |
| C | 2.60755500  | -1.02726800 | -4.39064600 |
| C | 3.68772300  | -1.72645100 | -3.88361300 |
| H | 4.39965100  | -2.96884200 | -2.29169400 |
| H | 2.69485300  | -0.53053600 | -5.35377800 |
| H | 4.61924800  | -1.77526700 | -4.43929200 |
| H | 0.90588400  | 1.84277000  | 3.81905400  |
| N | 0.16960900  | -1.40340700 | -1.59177200 |
| C | -1.21975900 | -2.84912800 | -3.08412700 |
| H | -0.27531600 | -3.10209700 | -3.56702700 |
| H | -1.71076200 | -3.78317400 | -2.79655400 |
| H | -1.85950000 | -2.36881300 | -3.83258700 |
| C | -0.73826400 | 1.49702200  | -1.01810900 |
| H | 1.55961900  | 0.05995300  | -0.07670300 |
| C | 0.43472400  | 2.03585400  | -0.47058800 |
| C | 1.56871700  | 2.40710600  | -1.38592000 |
| C | 2.64150900  | 1.60025000  | -1.75354800 |
| C | 1.50498400  | 3.68339300  | -1.97665900 |
| C | 3.58718100  | 2.00988800  | -2.69305500 |
| H | 2.72962200  | 0.60796100  | -1.32538400 |
| C | 2.42957600  | 4.10754100  | -2.91243400 |
| H | 0.67901000  | 4.34272600  | -1.71951900 |
| C | 3.47587600  | 3.26065300  | -3.29103900 |
| H | 4.38676900  | 1.32898200  | -2.95867400 |
| H | 2.35266500  | 5.08228500  | -3.38199700 |
| C | 0.35313400  | 2.89635000  | 0.78711900  |
| H | 1.02519900  | 2.50023300  | 1.55627700  |
| C | -1.02805100 | 3.10752300  | 1.38205000  |
| H | -0.96603100 | 3.69368600  | 2.30314300  |
| H | -1.68207100 | 3.64815900  | 0.69202000  |
| H | -1.53025500 | 2.16910800  | 1.62887900  |
| O | 4.31657800  | 3.73863500  | -4.25047300 |
| C | 5.31963600  | 2.85937800  | -4.70973100 |
| H | 6.02900300  | 2.59839200  | -3.91470100 |
| H | 4.88998000  | 1.93337100  | -5.11435600 |
| H | 5.84941900  | 3.38688200  | -5.50146600 |
| H | -1.70847900 | 1.66724400  | -0.55862000 |
| H | -0.76806200 | 1.21727200  | -2.06763400 |
| H | 0.78159900  | 3.87662300  | 0.53804400  |
| C | 2.77815800  | 0.54815600  | 2.25539600  |
| H | 2.50477000  | 1.28187300  | 1.48954900  |
| C | 3.61074800  | 1.24129600  | 3.33175300  |
| H | 3.10812600  | 2.10787400  | 3.76963600  |
| H | 3.86266400  | 0.55229800  | 4.14634200  |
| H | 4.55397200  | 1.59645700  | 2.91025400  |
| C | 3.60679200  | -0.53727200 | 1.58657800  |
| H | 3.02955900  | -1.04923600 | 0.81855900  |
| H | 4.49567000  | -0.11460200 | 1.10880800  |

|   |             |             |             |
|---|-------------|-------------|-------------|
| H | 3.94345100  | -1.28133200 | 2.31834700  |
| C | 0.24869800  | -0.20574000 | -4.36648500 |
| H | -0.62113500 | -0.24179900 | -3.70068100 |
| C | -0.13221900 | -0.88822800 | -5.68489300 |
| H | -1.03659400 | -0.43891200 | -6.10602400 |
| H | 0.66367100  | -0.76790900 | -6.42657100 |
| H | -0.30749700 | -1.95980000 | -5.57075000 |
| C | 0.56651500  | 1.26399400  | -4.64026800 |
| H | -0.27591600 | 1.74973700  | -5.14232800 |
| H | 0.78161000  | 1.81825800  | -3.72750900 |
| H | 1.43819000  | 1.36401100  | -5.29600000 |
| C | 2.22123300  | -3.13748100 | -0.65480500 |
| H | 1.71220000  | -2.48940800 | 0.07368400  |
| C | 1.31707700  | -4.35237600 | -0.88783700 |
| H | 1.74435900  | -5.00883800 | -1.65350200 |
| H | 1.21291000  | -4.93761800 | 0.03066700  |
| H | 0.31482600  | -4.06791200 | -1.20999300 |
| C | 3.53967500  | -3.60920700 | -0.05164900 |
| H | 3.99719600  | -4.39835600 | -0.65768200 |
| H | 4.27011500  | -2.80330000 | 0.04841700  |
| H | 3.36936800  | -4.02964100 | 0.94322800  |

### I'''(2c)

0 2

|    |             |             |             |
|----|-------------|-------------|-------------|
| Fe | 0.96337300  | -0.49533700 | 0.28169500  |
| N  | 0.39027500  | 1.04774900  | 1.42510500  |
| C  | -0.59446900 | 0.97001000  | 2.27491800  |
| H  | 1.11503900  | 2.77805800  | 3.82597600  |
| N  | -0.96200900 | -1.05151600 | 0.25181900  |
| C  | -1.87787500 | -0.90499300 | 1.24036900  |
| C  | -2.56600400 | -2.36740500 | -1.01114400 |
| C  | -3.12288500 | -1.61699500 | 1.21187700  |
| C  | -3.42923800 | -2.37290600 | 0.04343500  |
| H  | -2.80492600 | -2.89665400 | -1.92720100 |
| H  | -4.36777100 | -2.91620400 | 0.00118600  |
| C  | -1.65053200 | -0.00365200 | 2.32680800  |
| C  | -3.99587100 | -1.53691000 | 2.30205600  |
| C  | -3.70802100 | -0.73217000 | 3.39710600  |
| H  | -4.39252800 | -0.68519000 | 4.23659500  |
| C  | -2.56499800 | 0.04949100  | 3.39129600  |
| H  | -2.36827800 | 0.73886800  | 4.20298000  |
| H  | -4.91751200 | -2.11101100 | 2.26825600  |
| O  | -0.66727900 | 1.96814600  | 3.18482500  |
| C  | -1.32480000 | -1.70056300 | -0.90462300 |
| C  | -0.35453000 | -1.66277400 | -1.93425200 |
| C  | 1.86167100  | -1.02782700 | -2.55981800 |
| C  | 2.61161500  | -2.16353500 | -2.92688700 |
| C  | 2.16240900  | 0.24492100  | -3.10795900 |
| C  | 3.69209100  | -1.96760400 | -3.79984200 |
| C  | 3.23572900  | 0.37054600  | -3.98173400 |
| C  | 4.01275900  | -0.73045600 | -4.32069400 |

|   |             |             |             |
|---|-------------|-------------|-------------|
| H | 4.31518100  | -2.82505600 | -4.04312500 |
| H | 3.47202100  | 1.34142500  | -4.40396300 |
| H | 4.86306500  | -0.61965600 | -4.98606400 |
| H | 0.07526600  | 3.85866700  | 2.87380500  |
| N | 0.80311100  | -1.08331300 | -1.60646600 |
| C | -0.66520800 | -2.21202900 | -3.29253300 |
| H | 0.11576300  | -1.96589700 | -4.01228000 |
| H | -0.77303700 | -3.30222400 | -3.28255900 |
| H | -1.61053600 | -1.80628800 | -3.66580200 |
| C | 1.38541900  | -1.87257900 | 1.76076200  |
| C | 2.62104000  | -1.27650400 | 1.45117300  |
| H | 0.83485200  | -1.54908300 | 2.64293900  |
| H | 1.12657300  | -2.86642600 | 1.40677600  |
| C | 1.27751500  | 1.43708100  | -2.80489000 |
| H | 0.92481300  | 1.31513300  | -1.77389800 |
| C | 2.00479600  | 2.77286800  | -2.89915500 |
| H | 1.35698600  | 3.58446500  | -2.55463600 |
| H | 2.91407100  | 2.78445300  | -2.28930200 |
| H | 2.29024900  | 3.01608000  | -3.92744100 |
| C | 0.04363400  | 1.43969800  | -3.70996900 |
| H | -0.54119400 | 0.52372300  | -3.59962700 |
| H | -0.61400200 | 2.28213500  | -3.47263300 |
| H | 0.33134500  | 1.52650500  | -4.76342300 |
| C | 1.10442000  | 2.30895300  | 1.66964800  |
| C | 0.45744700  | 2.83718900  | 2.95359300  |
| H | 2.16016900  | 2.08629800  | 1.83711200  |
| C | 1.02014000  | 3.23208300  | 0.45067800  |
| H | 1.51841500  | 2.67226600  | -0.34793700 |
| C | -0.41414100 | 3.50427300  | 0.02153300  |
| C | 1.80602900  | 4.51293000  | 0.69128700  |
| H | -0.98594200 | 4.01454700  | 0.80578000  |
| H | -0.44279600 | 4.14719700  | -0.86255400 |
| H | -0.93911700 | 2.57636000  | -0.22456600 |
| H | 1.35237000  | 5.13087800  | 1.47473100  |
| H | 2.83748900  | 4.30133700  | 0.99111400  |
| H | 1.84491300  | 5.12491400  | -0.21355900 |
| H | 2.21837600  | 0.27986700  | -0.07899800 |
| C | 2.45207900  | -3.61643200 | -2.46965800 |
| H | 3.46015700  | -3.88918900 | -2.12338400 |
| C | 2.13738500  | -4.52503400 | -3.66463000 |
| C | 1.51528400  | -3.96967000 | -1.32020700 |
| H | 2.85923100  | -4.41582800 | -4.47637600 |
| H | 2.13803100  | -5.57471500 | -3.35531400 |
| H | 1.14753900  | -4.30609100 | -4.07636200 |
| H | 1.57791700  | -3.26112200 | -0.49985800 |
| H | 0.46923600  | -4.03910600 | -1.62958500 |
| H | 1.79446600  | -4.95312700 | -0.92916900 |
| C | 3.19327300  | -0.28494300 | 2.45277800  |
| C | 3.64354300  | -2.03587400 | 0.67133000  |
| C | 3.91912400  | -3.36458100 | 1.00461900  |
| C | 4.43342600  | -1.45122300 | -0.33009100 |

|   |            |             |             |
|---|------------|-------------|-------------|
| C | 4.91994800 | -4.09668900 | 0.37046200  |
| H | 3.33076700 | -3.84266900 | 1.78359000  |
| C | 5.44474400 | -2.15441700 | -0.95782700 |
| H | 4.21709600 | -0.43435800 | -0.64414400 |
| C | 5.69139300 | -3.48698500 | -0.61901600 |
| H | 5.08872500 | -5.12831800 | 0.65577100  |
| H | 6.03472700 | -1.70203200 | -1.74747900 |
| H | 2.36198500 | 0.25262700  | 2.92317300  |
| H | 3.64064500 | -0.88211400 | 3.26310100  |
| C | 4.24795300 | 0.68797300  | 1.95028000  |
| H | 5.17093900 | 0.17261000  | 1.67396500  |
| H | 3.90734400 | 1.23339000  | 1.06377400  |
| H | 4.50319100 | 1.41797000  | 2.72440600  |
| O | 6.67809500 | -4.10750800 | -1.32493000 |
| C | 6.91580200 | -5.46703100 | -1.03438600 |
| H | 7.71736800 | -5.78565800 | -1.69888500 |
| H | 7.23249500 | -5.61225400 | 0.00574500  |
| H | 6.02658200 | -6.08246700 | -1.22152300 |

### I''(2d)

0 2

|    |             |             |             |
|----|-------------|-------------|-------------|
| Fe | 0.35576400  | -0.79852400 | 0.41235400  |
| N  | 0.11358100  | 0.73009600  | 1.66826400  |
| C  | -0.86762900 | 0.77921900  | 2.52223200  |
| H  | 1.12161000  | 2.29363700  | 4.17326300  |
| N  | -1.64205600 | -0.92441200 | 0.32218900  |
| C  | -2.51850900 | -0.66669300 | 1.32327300  |
| C  | -3.47528400 | -1.71480600 | -1.05919300 |
| C  | -3.89089800 | -1.07080200 | 1.22967200  |
| C  | -4.33889300 | -1.61544200 | -0.00934300 |
| H  | -3.81114100 | -2.08533900 | -2.02190900 |
| H  | -5.37721500 | -1.91675400 | -0.10420300 |
| C  | -2.10977900 | 0.04953400  | 2.49165400  |
| C  | -4.74080000 | -0.90590500 | 2.32881400  |
| C  | -4.29461900 | -0.30414000 | 3.49813800  |
| H  | -4.96321600 | -0.18962000 | 4.34391400  |
| C  | -3.00468500 | 0.19814300  | 3.56237000  |
| H  | -2.67229600 | 0.74359800  | 4.43702800  |
| H  | -5.76784700 | -1.24966300 | 2.24395000  |
| O  | -0.73597500 | 1.67633900  | 3.52217200  |
| C  | -2.11411800 | -1.37409400 | -0.88812100 |
| C  | -1.12983100 | -1.49912500 | -1.89720200 |
| C  | 1.21693600  | -1.41576300 | -2.40083300 |
| C  | 1.69056800  | -2.68382300 | -2.79959900 |
| C  | 1.87385200  | -0.23404800 | -2.83127900 |
| C  | 2.87771700  | -2.72278200 | -3.54689400 |
| C  | 3.02847200  | -0.34005900 | -3.59636200 |
| C  | 3.54850900  | -1.58205100 | -3.93822500 |
| H  | 3.28168800  | -3.69563900 | -3.81593000 |
| H  | 3.53748800  | 0.55992900  | -3.92379700 |
| H  | 4.46729900  | -1.65549800 | -4.51097700 |

|   |             |             |             |
|---|-------------|-------------|-------------|
| H | 0.22554200  | 3.45752100  | 3.16859600  |
| N | 0.12326700  | -1.25538500 | -1.50080100 |
| C | -1.51142700 | -1.83745800 | -3.30531000 |
| H | -0.65264000 | -1.77882000 | -3.97491100 |
| H | -1.93377800 | -2.84407600 | -3.39524100 |
| H | -2.27457900 | -1.14487200 | -3.67464800 |
| C | 0.46159300  | -2.39900500 | 1.73104900  |
| C | 1.79662700  | -1.99662500 | 1.56686400  |
| C | 2.67469400  | -2.78125100 | 0.61504300  |
| H | -0.12446700 | -2.09977700 | 2.59553700  |
| H | 0.09833100  | -3.29910000 | 1.24634900  |
| C | 1.28770700  | 1.12718500  | -2.51384900 |
| H | 0.85007300  | 1.05665000  | -1.51118100 |
| C | 2.32228400  | 2.24580100  | -2.49536200 |
| H | 1.87097300  | 3.17430400  | -2.13373800 |
| H | 3.16812300  | 2.00611700  | -1.84350000 |
| H | 2.71894600  | 2.45794900  | -3.49344300 |
| C | 0.15463600  | 1.46957600  | -3.48342700 |
| H | -0.64272100 | 0.72383700  | -3.45377500 |
| H | -0.29033800 | 2.43897500  | -3.23708600 |
| H | 0.52288700  | 1.52320200  | -4.51378500 |
| C | 2.47838000  | -1.16801400 | 2.58593400  |
| C | 1.90182600  | -0.89335100 | 3.83844900  |
| C | 3.73355000  | -0.59913400 | 2.33711300  |
| C | 2.51419800  | -0.06211000 | 4.75852200  |
| H | 0.94681000  | -1.33652800 | 4.10123100  |
| C | 4.36666400  | 0.23718500  | 3.25102700  |
| H | 4.21859100  | -0.77703600 | 1.38299200  |
| C | 3.74756300  | 0.52671200  | 4.46764700  |
| H | 2.05492200  | 0.14645800  | 5.71941800  |
| H | 5.33134900  | 0.66308700  | 3.00141500  |
| O | 4.25462400  | 1.35608500  | 5.42202000  |
| C | 5.49482100  | 1.96942000  | 5.14431800  |
| H | 5.72732700  | 2.59147800  | 6.00705200  |
| H | 6.29300900  | 1.22953700  | 5.00909000  |
| H | 5.44295200  | 2.60104200  | 4.24838900  |
| H | 3.37588000  | -2.11869700 | 0.09665900  |
| C | 1.08963500  | 1.76931800  | 2.02836700  |
| C | 0.48941400  | 2.40154200  | 3.28936900  |
| H | 2.04057800  | 1.28235100  | 2.25882100  |
| C | 1.33400900  | 2.73069600  | 0.86272700  |
| H | 1.76517300  | 2.10336100  | 0.07460200  |
| C | 0.04804000  | 3.34811300  | 0.33270700  |
| C | 2.36479100  | 3.78089400  | 1.25263700  |
| H | -0.46640400 | 3.94305900  | 1.09669000  |
| H | 0.25037100  | 4.01820700  | -0.50754700 |
| H | -0.64838200 | 2.57800000  | -0.01300200 |
| H | 1.98343200  | 4.46008900  | 2.02404200  |
| H | 3.27814500  | 3.31795400  | 1.64097600  |
| H | 2.64359800  | 4.39776000  | 0.39412600  |
| H | 1.75196700  | -0.28617700 | 0.10469200  |

|   |             |             |             |
|---|-------------|-------------|-------------|
| H | 2.04818900  | -3.19245500 | -0.17837500 |
| C | 3.42817600  | -3.91055200 | 1.30863300  |
| H | 4.09334000  | -3.52847100 | 2.08863800  |
| H | 2.73596700  | -4.61120400 | 1.78528700  |
| H | 4.03916500  | -4.47477600 | 0.59838500  |
| C | 1.10458200  | -4.07704900 | -2.52977600 |
| H | 1.96438600  | -4.65594800 | -2.15917100 |
| C | 0.67826100  | -4.73107100 | -3.85054700 |
| C | -0.00880700 | -4.28491800 | -1.50654900 |
| H | 0.36372000  | -5.76529500 | -3.68152000 |
| H | -0.16867500 | -4.19849900 | -4.29343300 |
| H | 1.48089400  | -4.74072000 | -4.59024200 |
| H | 0.12407800  | -3.70431800 | -0.59800100 |
| H | -0.99642800 | -4.04326500 | -1.90403100 |
| H | -0.03676300 | -5.34256200 | -1.22832900 |

**TS<sub>1</sub><sup>...</sup>(2a)**

0 2

|    |             |             |             |
|----|-------------|-------------|-------------|
| Fe | -0.07419900 | 0.22399000  | -0.07104700 |
| N  | 0.14314800  | 0.09117900  | 1.93148100  |
| C  | 1.28966800  | 0.00970300  | 2.88672500  |
| C  | -0.90110100 | 0.40927500  | 2.65836600  |
| C  | 0.78433600  | 0.83988500  | 4.05166800  |
| H  | 1.08325800  | 0.47498800  | 5.03439600  |
| N  | -1.90605200 | -0.45407100 | 0.08362200  |
| C  | -2.76769300 | -0.14901600 | 1.08218300  |
| C  | -3.69589300 | -1.57817800 | -1.09987000 |
| C  | -4.17287700 | -0.40632900 | 0.95505300  |
| C  | -4.60804300 | -1.14026100 | -0.18543400 |
| H  | -4.01014100 | -2.17157300 | -1.95117100 |
| H  | -5.66456200 | -1.36334100 | -0.29409100 |
| C  | -2.29295500 | 0.42540800  | 2.30244600  |
| C  | -5.05382000 | 0.05139900  | 1.93970300  |
| C  | -4.58534800 | 0.71722000  | 3.06700900  |
| H  | -5.28142200 | 1.07942600  | 3.81544000  |
| C  | -3.22411900 | 0.87502400  | 3.25817700  |
| H  | -2.84835900 | 1.32154300  | 4.16988000  |
| H  | -6.11659800 | -0.13077000 | 1.80847900  |
| O  | -0.64277800 | 0.73264800  | 3.95074800  |
| C  | -2.33468500 | -1.22380600 | -0.97139000 |
| C  | -1.32997200 | -1.58261800 | -1.90614100 |
| C  | 0.94860500  | -1.35874200 | -2.58501100 |
| C  | 2.00550500  | -2.20478100 | -2.16698400 |
| C  | 0.99050100  | -0.74557900 | -3.86019500 |
| C  | 3.11850200  | -2.35137700 | -2.99018200 |
| C  | 2.14216300  | -0.91119700 | -4.63533900 |
| C  | 3.20455700  | -1.68872000 | -4.20821000 |
| H  | 3.93425200  | -2.99352200 | -2.67562000 |
| H  | 2.19252200  | -0.42782300 | -5.60767800 |
| H  | 4.08655800  | -1.79998200 | -4.83064800 |
| H  | 1.05616300  | 1.89864800  | 3.95402500  |

|   |             |             |             |
|---|-------------|-------------|-------------|
| N | -0.10175600 | -1.12421800 | -1.65923300 |
| C | -1.67367300 | -2.48287700 | -3.05392800 |
| H | -0.77722000 | -2.82064100 | -3.57452800 |
| H | -2.20782700 | -3.37000200 | -2.70059900 |
| H | -2.32360000 | -1.99264900 | -3.78645000 |
| C | -0.37967900 | 1.87712600  | -1.14630300 |
| H | 1.40705300  | 0.60091300  | -0.14767600 |
| C | 0.98851900  | 1.98948900  | -0.70691400 |
| C | 2.08437300  | 1.93023500  | -1.76988100 |
| H | -1.14262100 | 2.52451600  | -0.72118700 |
| H | -0.56679800 | 1.59134900  | -2.17711200 |
| C | 1.87577700  | -3.00074200 | -0.88321300 |
| H | 1.41729900  | -2.33707500 | -0.13668400 |
| C | 3.20587000  | -3.50691300 | -0.33864900 |
| H | 3.95792700  | -2.71616400 | -0.27459600 |
| H | 3.07138500  | -3.92260600 | 0.66356200  |
| H | 3.61746800  | -4.30727500 | -0.96242600 |
| C | 0.91877200  | -4.18094500 | -1.07622700 |
| H | -0.08243800 | -3.85352000 | -1.36039400 |
| H | 1.28809600  | -4.85454600 | -1.85699900 |
| H | 0.82644100  | -4.76028100 | -0.15269700 |
| C | -0.16959700 | 0.02244100  | -4.48112500 |
| H | -0.99004400 | 0.06309700  | -3.75572200 |
| C | 0.17336100  | 1.46002200  | -4.88087400 |
| H | 1.03509500  | 1.48722200  | -5.55506700 |
| H | -0.66837000 | 1.91120100  | -5.41441000 |
| H | 0.40003200  | 2.10187100  | -4.02937600 |
| C | -0.66880400 | -0.70776600 | -5.73572900 |
| H | -0.84357100 | -1.77109600 | -5.56607200 |
| H | -1.59988200 | -0.26283700 | -6.09940200 |
| H | 0.06624200  | -0.62687000 | -6.54281800 |
| C | 1.21975300  | 2.95511300  | 0.42247200  |
| C | 0.22586900  | 3.19429300  | 1.38814600  |
| C | 2.40724900  | 3.67694700  | 0.56366300  |
| C | 0.42020300  | 4.06017000  | 2.44584300  |
| H | -0.72955600 | 2.68554900  | 1.31492400  |
| C | 2.62688500  | 4.55177500  | 1.62756600  |
| H | 3.19888200  | 3.57091200  | -0.16851900 |
| C | 1.63625700  | 4.73627000  | 2.58824900  |
| H | -0.35763700 | 4.22314800  | 3.18524500  |
| H | 3.56948700  | 5.08234200  | 1.68940400  |
| O | 1.74933400  | 5.53992900  | 3.68033300  |
| C | 2.96952400  | 6.22989600  | 3.84412600  |
| H | 2.87368100  | 6.80449200  | 4.76382300  |
| H | 3.81609000  | 5.53820900  | 3.93750400  |
| H | 3.16340600  | 6.91529700  | 3.01018600  |
| H | 1.67744700  | 1.41432600  | -2.63968400 |
| H | 2.28133800  | 2.96020500  | -2.09833800 |
| C | 3.38151400  | 1.23031000  | -1.38861300 |
| H | 4.15031900  | 1.38959600  | -2.14948600 |
| H | 3.78536000  | 1.56812400  | -0.42988400 |

|   |            |             |             |
|---|------------|-------------|-------------|
| H | 3.22307400 | 0.15114500  | -1.31060700 |
| H | 1.35015100 | -1.04770600 | 3.19765000  |
| C | 2.66554000 | 0.42369100  | 2.36424600  |
| H | 2.52495000 | 1.30758800  | 1.73209300  |
| C | 3.29321300 | -0.68960400 | 1.54354900  |
| H | 4.26151100 | -0.38814100 | 1.13357600  |
| H | 3.45857400 | -1.57996600 | 2.16181800  |
| H | 2.65056200 | -0.97031700 | 0.70962200  |
| C | 3.59508100 | 0.80366600  | 3.51498300  |
| H | 4.59002100 | 1.04578400  | 3.13230700  |
| H | 3.24578300 | 1.67535900  | 4.07489600  |
| H | 3.71501800 | -0.02627500 | 4.22154300  |

Imaginary Frequency: -613.43

**TS<sub>1</sub>... (2b)**

0 2

|    |             |             |             |
|----|-------------|-------------|-------------|
| Fe | -0.04969500 | 0.05694200  | -0.00144800 |
| N  | 0.25730700  | -0.13546400 | 1.96332600  |
| C  | 1.44430500  | -0.06869600 | 2.86404900  |
| C  | -0.78997000 | -0.08570700 | 2.75392200  |
| C  | 0.85322500  | 0.63395500  | 4.06922900  |
| H  | 1.67412300  | -1.11294600 | 3.14245700  |
| H  | 1.28203300  | 0.34933800  | 5.02950600  |
| N  | -1.72010700 | -0.97704200 | 0.16591800  |
| C  | -2.58380200 | -0.89521800 | 1.20231600  |
| C  | -3.32928700 | -2.28927800 | -1.07236300 |
| C  | -3.92661400 | -1.38723700 | 1.08747900  |
| C  | -4.27222100 | -2.08035100 | -0.10704700 |
| H  | -3.57096600 | -2.85517200 | -1.96503500 |
| H  | -5.28180900 | -2.46308600 | -0.21751900 |
| C  | -2.17004500 | -0.33194700 | 2.45289100  |
| C  | -4.83261100 | -1.18198800 | 2.13340000  |
| C  | -4.44097700 | -0.54168500 | 3.30440700  |
| H  | -5.15731300 | -0.38026300 | 4.10238800  |
| C  | -3.12574800 | -0.14565900 | 3.47050900  |
| H  | -2.80089700 | 0.29250100  | 4.40567600  |
| H  | -5.85106900 | -1.54039200 | 2.01488800  |
| O  | -0.51987600 | 0.21801600  | 4.05212100  |
| C  | -2.03789600 | -1.73856000 | -0.92953900 |
| C  | -0.97830200 | -1.92147200 | -1.86342400 |
| C  | 1.30830900  | -1.49615900 | -2.40662300 |
| C  | 2.38396500  | -2.25608200 | -1.88153800 |
| C  | 1.41095600  | -0.90179200 | -3.68275800 |
| C  | 3.57399600  | -2.31824300 | -2.60265700 |
| C  | 2.62879000  | -0.99545100 | -4.36169100 |
| C  | 3.70942200  | -1.67454100 | -3.82770800 |
| H  | 4.40761500  | -2.89032900 | -2.20970300 |
| H  | 2.72223200  | -0.52148100 | -5.33574300 |
| H  | 4.64780700  | -1.72697900 | -4.37154800 |
| H  | 0.88725800  | 1.72901300  | 3.96234500  |
| N  | 0.17356600  | -1.32423600 | -1.57219400 |



|   |             |             |             |
|---|-------------|-------------|-------------|
| C | -1.18382600 | -2.81453000 | -3.04908100 |
| H | -0.23577300 | -3.05332500 | -3.53172300 |
| H | -1.65563300 | -3.75558100 | -2.75292600 |
| H | -1.83481100 | -2.35335800 | -3.79988300 |
| C | -0.77021900 | 1.60038600  | -1.06243800 |
| H | 1.29726500  | 0.73660100  | -0.04413000 |
| C | 0.47521000  | 2.04907900  | -0.51617900 |
| C | 1.57857300  | 2.42397500  | -1.47881400 |
| C | 2.65982000  | 1.61169500  | -1.79839000 |
| C | 1.49231400  | 3.66641400  | -2.12871600 |
| C | 3.60828700  | 1.98658200  | -2.74938700 |
| H | 2.75358800  | 0.63826100  | -1.32640000 |
| C | 2.42199300  | 4.05819400  | -3.07309200 |
| H | 0.65282200  | 4.32218700  | -1.91045200 |
| C | 3.48455800  | 3.20914000  | -3.40149000 |
| H | 4.41574100  | 1.30318200  | -2.98225300 |
| H | 2.33845700  | 5.00841700  | -3.58925100 |
| C | 0.41592600  | 2.99435600  | 0.69261500  |
| H | 1.19076400  | 2.71158400  | 1.41210400  |
| C | -0.91769200 | 3.12469600  | 1.40881600  |
| H | -0.80555100 | 3.72060200  | 2.31865200  |
| H | -1.66423600 | 3.62390800  | 0.78597300  |
| H | -1.33870800 | 2.15997300  | 1.70162800  |
| O | 4.32736100  | 3.65664600  | -4.37310600 |
| C | 5.35642000  | 2.77918600  | -4.77525000 |
| H | 6.05471300  | 2.56717600  | -3.95626100 |
| H | 4.95338400  | 1.82846100  | -5.14823300 |
| H | 5.89101500  | 3.28341200  | -5.57872600 |
| H | -1.71375100 | 1.92220400  | -0.62916400 |
| H | -0.81905600 | 1.33714600  | -2.11592500 |
| H | 0.72088900  | 3.98853500  | 0.34183600  |
| C | 2.72890900  | 0.55089500  | 2.31491900  |
| H | 2.46166500  | 1.45086100  | 1.75005800  |
| C | 3.64851700  | 0.95553800  | 3.46515500  |
| H | 3.21684100  | 1.73257600  | 4.10192800  |
| H | 3.88454200  | 0.09483000  | 4.10164300  |
| H | 4.59575700  | 1.34100700  | 3.08094400  |
| C | 3.45860600  | -0.40370600 | 1.38500600  |
| H | 2.82182700  | -0.72063600 | 0.55786200  |
| H | 4.35075800  | 0.06517700  | 0.95926400  |
| H | 3.78032400  | -1.29709700 | 1.93152000  |
| C | 0.26056100  | -0.20043700 | -4.38449300 |
| H | -0.61321200 | -0.22320600 | -3.72317900 |
| C | -0.10194500 | -0.92563600 | -5.68530300 |
| H | -1.00675100 | -0.49763400 | -6.12727800 |
| H | 0.69956200  | -0.81833000 | -6.42302700 |
| H | -0.26808100 | -1.99508800 | -5.54256500 |
| C | 0.56665600  | 1.26233200  | -4.70150800 |
| H | -0.27571500 | 1.72473500  | -5.22532300 |
| H | 0.76657300  | 1.84499500  | -3.80384500 |
| H | 1.44316300  | 1.35129200  | -5.35257600 |

|   |            |             |             |
|---|------------|-------------|-------------|
| C | 2.20112800 | -3.06331000 | -0.60826500 |
| H | 1.66318900 | -2.42902200 | 0.11156600  |
| C | 1.32161500 | -4.29138800 | -0.86646300 |
| H | 1.77275400 | -4.93417900 | -1.62997100 |
| H | 1.21194100 | -4.88548200 | 0.04575600  |
| H | 0.32038500 | -4.02114200 | -1.20285600 |
| C | 3.51248400 | -3.51915100 | 0.02134800  |
| H | 3.98578100 | -4.30900200 | -0.57147600 |
| H | 4.23452500 | -2.70641000 | 0.12426700  |
| H | 3.33025500 | -3.93474100 | 1.01624800  |

Imaginary Frequency: -491.93

**TS<sub>1</sub><sup>int</sup> (2c)**

0 2

|    |             |             |             |
|----|-------------|-------------|-------------|
| Fe | 0.85734200  | -0.60409200 | 0.34655900  |
| N  | 0.35774500  | 0.99662600  | 1.46578200  |
| C  | -0.66219800 | 0.95594600  | 2.27942600  |
| H  | 1.07438000  | 2.65420700  | 3.89533500  |
| N  | -1.03876700 | -1.06799500 | 0.25035900  |
| C  | -1.98299100 | -0.87028900 | 1.20592200  |
| C  | -2.66370300 | -2.30226600 | -1.06994200 |
| C  | -3.25609600 | -1.52822300 | 1.13539800  |
| C  | -3.55735100 | -2.27309900 | -0.04244300 |
| H  | -2.89824000 | -2.81802600 | -1.99472400 |
| H  | -4.51713100 | -2.77430900 | -0.11459600 |
| C  | -1.75672000 | 0.02717700  | 2.29483600  |
| C  | -4.16158000 | -1.40563900 | 2.19344300  |
| C  | -3.87808500 | -0.60972100 | 3.29719400  |
| H  | -4.58923100 | -0.53056000 | 4.11184100  |
| C  | -2.70486700 | 0.12230400  | 3.32903500  |
| H  | -2.50713700 | 0.80615900  | 4.14489800  |
| H  | -5.10645900 | -1.93756500 | 2.12691100  |
| O  | -0.73066500 | 1.95855000  | 3.18812100  |
| C  | -1.39729600 | -1.69211900 | -0.92748900 |
| C  | -0.40125800 | -1.68545400 | -1.92690900 |
| C  | 1.83138400  | -1.08997500 | -2.51480100 |
| C  | 2.56173900  | -2.23336400 | -2.90019300 |
| C  | 2.15683000  | 0.18393700  | -3.04825600 |
| C  | 3.62910000  | -2.04966000 | -3.79068400 |
| C  | 3.22070200  | 0.29930200  | -3.93601300 |
| C  | 3.96530600  | -0.81372400 | -4.30522800 |
| H  | 4.23390400  | -2.91501800 | -4.05105100 |
| H  | 3.47261400  | 1.27069000  | -4.34794700 |
| H  | 4.80528000  | -0.71304300 | -4.98528200 |
| H  | 0.11601000  | 3.81425900  | 2.95105000  |
| N  | 0.76639400  | -1.13234500 | -1.57043600 |
| C  | -0.69039100 | -2.23432600 | -3.29062200 |
| H  | 0.09913800  | -1.98561700 | -4.00016400 |
| H  | -0.79479100 | -3.32529200 | -3.28423500 |
| H  | -1.63078800 | -1.83134300 | -3.67845900 |
| C  | 1.48030900  | -1.88218000 | 1.75395900  |

|   |             |             |             |
|---|-------------|-------------|-------------|
| C | 2.66464000  | -1.20204200 | 1.31568600  |
| H | 1.03981800  | -1.59271400 | 2.70748200  |
| H | 1.29524900  | -2.91569100 | 1.47530700  |
| C | 1.30571300  | 1.39232300  | -2.71401600 |
| H | 0.96545700  | 1.26247700  | -1.67901700 |
| C | 2.06212700  | 2.71240100  | -2.80361200 |
| H | 1.43727400  | 3.53494600  | -2.44316500 |
| H | 2.97971800  | 2.69895200  | -2.20555900 |
| H | 2.34028100  | 2.96003700  | -3.83272600 |
| C | 0.05626600  | 1.43719600  | -3.59659400 |
| H | -0.54978600 | 0.53547400  | -3.48507800 |
| H | -0.57476000 | 2.29369600  | -3.33846000 |
| H | 0.32867800  | 1.52890600  | -4.65371100 |
| C | 1.09169000  | 2.24394800  | 1.72987700  |
| C | 0.44071600  | 2.77192000  | 3.01055000  |
| H | 2.14259300  | 2.01134400  | 1.90822000  |
| C | 1.03599400  | 3.17921700  | 0.51789900  |
| H | 1.53556000  | 2.62079800  | -0.28095900 |
| C | -0.38792700 | 3.47791200  | 0.07275800  |
| C | 1.83927700  | 4.44566100  | 0.77767200  |
| H | -0.95924200 | 3.99273400  | 0.85419700  |
| H | -0.39506700 | 4.12665800  | -0.80755300 |
| H | -0.92553200 | 2.56057200  | -0.18494600 |
| H | 1.38322500  | 5.06683300  | 1.55685200  |
| H | 2.86248000  | 4.21654900  | 1.09296400  |
| H | 1.90222300  | 5.06140900  | -0.12326000 |
| H | 2.30448700  | -0.08199300 | 0.21926600  |
| C | 2.40032700  | -3.68122700 | -2.42928700 |
| H | 3.41025300  | -3.95082800 | -2.08305600 |
| C | 2.07844500  | -4.60445200 | -3.61070400 |
| C | 1.46738700  | -4.01404300 | -1.27151400 |
| H | 2.79587700  | -4.50809100 | -4.42793000 |
| H | 2.07837800  | -5.64992300 | -3.28777700 |
| H | 1.08694600  | -4.38853900 | -4.01966700 |
| H | 1.55349600  | -3.30549200 | -0.45286000 |
| H | 0.41683400  | -4.05777500 | -1.57003200 |
| H | 1.72765300  | -5.00408400 | -0.88369800 |
| C | 3.29227500  | -0.25961400 | 2.34603900  |
| C | 3.69760900  | -1.97410600 | 0.54239900  |
| C | 4.01994300  | -3.27623800 | 0.92652600  |
| C | 4.46166200  | -1.39870000 | -0.48088800 |
| C | 5.04319700  | -3.99561200 | 0.31435100  |
| H | 3.45371000  | -3.74365800 | 1.72761200  |
| C | 5.49286100  | -2.08870700 | -1.09111500 |
| H | 4.21891500  | -0.39682700 | -0.82690500 |
| C | 5.78681200  | -3.39818400 | -0.70397900 |
| H | 5.25042500  | -5.00865400 | 0.63783700  |
| H | 6.06554200  | -1.64401600 | -1.89738800 |
| H | 2.48200400  | 0.23855800  | 2.89006300  |
| H | 3.78801800  | -0.90093400 | 3.08805800  |
| C | 4.29936800  | 0.75220000  | 1.82364300  |

|   |            |             |             |
|---|------------|-------------|-------------|
| H | 5.21948600 | 0.26800200  | 1.48828100  |
| H | 3.90591100 | 1.31472900  | 0.96848700  |
| H | 4.57341100 | 1.47230200  | 2.60004100  |
| O | 6.79440400 | -4.00840300 | -1.38728000 |
| C | 7.09044000 | -5.34290300 | -1.03806900 |
| H | 7.90409800 | -5.65540100 | -1.69054000 |
| H | 7.41445100 | -5.42797000 | 0.00636700  |
| H | 6.22854100 | -6.00342600 | -1.19543900 |

Imaginary Frequency: -584.08

**TS<sub>1</sub><sup>...</sup> (2d)**

0 2

|    |             |             |             |
|----|-------------|-------------|-------------|
| Fe | 0.13736800  | -0.90301300 | 0.50958800  |
| N  | -0.10665300 | 0.64785300  | 1.78132700  |
| C  | -1.16540400 | 0.72814400  | 2.53797000  |
| H  | 0.69124000  | 2.19435000  | 4.37243700  |
| N  | -1.79912400 | -0.96473500 | 0.27970600  |
| C  | -2.74826300 | -0.67170900 | 1.20763900  |
| C  | -3.55636900 | -1.63455500 | -1.26474700 |
| C  | -4.12211200 | -1.02655200 | 0.99860000  |
| C  | -4.49281400 | -1.53620300 | -0.28136800 |
| H  | -3.82945100 | -1.96489700 | -2.26131200 |
| H  | -5.53029900 | -1.79898600 | -0.46059100 |
| C  | -2.41811900 | 0.03323200  | 2.40418600  |
| C  | -5.05126900 | -0.84016600 | 2.02627900  |
| C  | -4.68440700 | -0.25759600 | 3.23330600  |
| H  | -5.41606600 | -0.12627700 | 4.02264000  |
| C  | -3.39212200 | 0.20720700  | 3.40226400  |
| H  | -3.11542800 | 0.74187300  | 4.30221800  |
| H  | -6.07907700 | -1.14668100 | 1.85323600  |
| O  | -1.10817800 | 1.63072600  | 3.54354700  |
| C  | -2.19991500 | -1.35049200 | -0.98655000 |
| C  | -1.15566000 | -1.47994500 | -1.92112400 |
| C  | 1.21822800  | -1.46666500 | -2.25501400 |
| C  | 1.64927500  | -2.74660700 | -2.66669800 |
| C  | 1.96633100  | -0.31154000 | -2.60192800 |
| C  | 2.86324900  | -2.82743900 | -3.36408100 |
| C  | 3.15351600  | -0.45656900 | -3.31061400 |
| C  | 3.61437900  | -1.71322000 | -3.68205900 |
| H  | 3.22851600  | -3.81202500 | -3.64585900 |
| H  | 3.73006600  | 0.42308200  | -3.57592800 |
| H  | 4.55273400  | -1.81933900 | -4.21680400 |
| H  | -0.06784300 | 3.38417100  | 3.29210500  |
| N  | 0.07651400  | -1.27207300 | -1.42869600 |
| C  | -1.44070500 | -1.78977600 | -3.35832500 |
| H  | -0.53952400 | -1.71961600 | -3.96873600 |
| H  | -1.85608000 | -2.79420900 | -3.49763600 |
| H  | -2.17614300 | -1.08878500 | -3.76585800 |
| C  | 0.56140800  | -2.36639500 | 1.81533600  |
| C  | 1.83338200  | -1.84125800 | 1.40905300  |
| C  | 2.67388600  | -2.74480300 | 0.51381400  |

|   |             |             |             |
|---|-------------|-------------|-------------|
| H | 0.12599400  | -2.07421500 | 2.76817500  |
| H | 0.26894300  | -3.35937100 | 1.48367300  |
| C | 1.43656700  | 1.06808100  | -2.26535400 |
| H | 0.94622500  | 0.98829800  | -1.28748600 |
| C | 2.52201700  | 2.13259000  | -2.16434800 |
| H | 2.09821500  | 3.07319100  | -1.80086100 |
| H | 3.32233500  | 1.83812900  | -1.47742000 |
| H | 2.97994000  | 2.34925600  | -3.13480800 |
| C | 0.36665000  | 1.49564900  | -3.27256800 |
| H | -0.46822800 | 0.79190500  | -3.29659300 |
| H | -0.03793000 | 2.48007100  | -3.01708700 |
| H | 0.78305900  | 1.55652900  | -4.28399800 |
| C | 2.65444000  | -1.03222200 | 2.37137000  |
| C | 2.41458700  | -1.02633900 | 3.74897400  |
| C | 3.70541600  | -0.24204300 | 1.89928400  |
| C | 3.15434900  | -0.22867900 | 4.60854500  |
| H | 1.62779100  | -1.65284100 | 4.15678200  |
| C | 4.46602200  | 0.55765700  | 2.74426800  |
| H | 3.90944500  | -0.21798100 | 0.83052900  |
| C | 4.17923200  | 0.57991800  | 4.11173000  |
| H | 2.96077700  | -0.21933800 | 5.67586300  |
| H | 5.26296200  | 1.16511700  | 2.33179600  |
| O | 4.83714600  | 1.34206200  | 5.02668100  |
| C | 5.86808300  | 2.17840600  | 4.54632100  |
| H | 6.26023200  | 2.70627900  | 5.41386000  |
| H | 6.67617400  | 1.60117500  | 4.08121000  |
| H | 5.49140100  | 2.90968600  | 3.82012400  |
| H | 3.35097700  | -2.15275500 | -0.11348000 |
| C | 0.85225600  | 1.66972300  | 2.23655200  |
| C | 0.14904900  | 2.31969000  | 3.43199800  |
| H | 1.76447100  | 1.17627500  | 2.57230500  |
| C | 1.24270200  | 2.61434600  | 1.09758700  |
| H | 1.75841600  | 1.97377800  | 0.37130600  |
| C | 0.03447500  | 3.23817500  | 0.41486900  |
| C | 2.23448800  | 3.65761600  | 1.59347300  |
| H | -0.55928400 | 3.84151000  | 1.11183400  |
| H | 0.33908400  | 3.90133000  | -0.39965900 |
| H | -0.62444800 | 2.47114100  | -0.00353300 |
| H | 1.77015100  | 4.35759500  | 2.29766400  |
| H | 3.08284500  | 3.18801300  | 2.10325000  |
| H | 2.62878300  | 4.25278400  | 0.76541300  |
| H | 1.63828200  | -0.64017100 | 0.39580000  |
| H | 2.00494100  | -3.25468900 | -0.18000300 |
| C | 3.46235000  | -3.77139200 | 1.31313700  |
| H | 4.18228200  | -3.29321100 | 1.98352300  |
| H | 2.79868800  | -4.38498900 | 1.93001600  |
| H | 4.01868600  | -4.44128300 | 0.65218100  |
| C | 0.99976300  | -4.11540300 | -2.41779400 |
| H | 1.82769600  | -4.72447700 | -2.02279100 |
| C | 0.59114700  | -4.76236300 | -3.74698200 |
| C | -0.14383200 | -4.27602800 | -1.41772900 |

|   |             |             |             |
|---|-------------|-------------|-------------|
| H | 0.23757000  | -5.78437000 | -3.58134900 |
| H | -0.22217000 | -4.20632300 | -4.22136500 |
| H | 1.41685600  | -4.80499500 | -4.45997800 |
| H | -0.00736900 | -3.70276900 | -0.50205400 |
| H | -1.11155400 | -3.99142700 | -1.83524300 |
| H | -0.22169300 | -5.33244700 | -1.14407100 |

Imaginary Frequency: -585.89

**II''(2a)**

0 2

|    |             |             |             |
|----|-------------|-------------|-------------|
| Fe | -0.18814100 | 0.15625400  | -0.06109700 |
| N  | 0.03961400  | 0.09026000  | 1.92197300  |
| C  | 1.18166500  | 0.00503500  | 2.88075300  |
| C  | -1.00776100 | 0.41285900  | 2.65003000  |
| C  | 0.68340300  | 0.84800100  | 4.03973300  |
| H  | 0.97602700  | 0.48423300  | 5.02490800  |
| N  | -1.97469400 | -0.48579600 | 0.07669800  |
| C  | -2.84612400 | -0.18461600 | 1.07070900  |
| C  | -3.73951800 | -1.65868800 | -1.10340500 |
| C  | -4.24621400 | -0.46636600 | 0.93325100  |
| C  | -4.66307100 | -1.22128600 | -0.20345900 |
| H  | -4.03714300 | -2.26947400 | -1.94867800 |
| H  | -5.71525500 | -1.46226900 | -0.31438500 |
| C  | -2.39210000 | 0.40568500  | 2.29111300  |
| C  | -5.13942200 | -0.01739000 | 1.90780900  |
| C  | -4.69265700 | 0.66535500  | 3.03688800  |
| H  | -5.40259000 | 1.01842500  | 3.77666800  |
| C  | -3.33895500 | 0.84809700  | 3.23858300  |
| H  | -2.97646700 | 1.30703800  | 4.14953500  |
| H  | -6.19739200 | -0.22270300 | 1.77196200  |
| O  | -0.74362300 | 0.75600100  | 3.93732000  |
| C  | -2.38222000 | -1.28525500 | -0.97481500 |
| C  | -1.36466200 | -1.63046800 | -1.88299200 |
| C  | 0.93783000  | -1.36742400 | -2.49685500 |
| C  | 1.98487800  | -2.22216000 | -2.06699300 |
| C  | 1.01181100  | -0.73552600 | -3.76205000 |
| C  | 3.12289400  | -2.34606800 | -2.85990800 |
| C  | 2.18696900  | -0.87973300 | -4.50588100 |
| C  | 3.24195200  | -1.65708700 | -4.06059200 |
| H  | 3.93130900  | -2.99329500 | -2.53700800 |
| H  | 2.26148900  | -0.38131800 | -5.46910500 |
| H  | 4.14319100  | -1.75091100 | -4.65800200 |
| H  | 0.97437700  | 1.90170400  | 3.93632100  |
| N  | -0.13886800 | -1.15640700 | -1.59474300 |
| C  | -1.66496300 | -2.52109900 | -3.04880100 |
| H  | -0.75039200 | -2.85013100 | -3.54338700 |
| H  | -2.20369000 | -3.41612000 | -2.72275400 |
| H  | -2.29371000 | -2.02943300 | -3.79897900 |
| C  | -0.28891800 | 1.83245100  | -1.07630400 |
| H  | 1.41612100  | 0.89749100  | -0.13827300 |
| C  | 1.14157000  | 1.92654000  | -0.65212400 |

|   |             |             |             |
|---|-------------|-------------|-------------|
| C | 2.18001900  | 1.94246800  | -1.78592600 |
| H | -0.96959100 | 2.59733700  | -0.70501400 |
| H | -0.45578600 | 1.62050000  | -2.13019000 |
| C | 1.81820000  | -3.06441200 | -0.81556000 |
| H | 1.33251100  | -2.43477900 | -0.05795000 |
| C | 3.13361100  | -3.58633100 | -0.25029300 |
| H | 3.88312500  | -2.79816800 | -0.14148300 |
| H | 2.97214800  | -4.03462200 | 0.73380400  |
| H | 3.56382300  | -4.36641700 | -0.88710800 |
| C | 0.87449400  | -4.24058200 | -1.08386100 |
| H | -0.12251300 | -3.90568500 | -1.37291800 |
| H | 1.26495000  | -4.87564500 | -1.88638200 |
| H | 0.76711000  | -4.86186400 | -0.18967300 |
| C | -0.14241700 | 0.01755800  | -4.41236700 |
| H | -0.97972400 | 0.04960900  | -3.70600900 |
| C | 0.18808400  | 1.45704700  | -4.81659200 |
| H | -0.64441600 | 1.88579400  | -5.38199900 |
| H | 0.37454000  | 2.11396700  | -3.96701000 |
| H | 1.06992200  | 1.49363300  | -5.46399900 |
| C | -0.59717200 | -0.72591300 | -5.67680300 |
| H | -0.75212900 | -1.79250100 | -5.51030200 |
| H | -1.52914100 | -0.30183300 | -6.06239200 |
| H | 0.15497700  | -0.62898600 | -6.46632900 |
| C | 1.36508700  | 2.98103300  | 0.42320000  |
| C | 0.38216700  | 3.23346800  | 1.39326400  |
| C | 2.53501100  | 3.73466000  | 0.50699900  |
| C | 0.57007300  | 4.15703000  | 2.40416800  |
| H | -0.55858000 | 2.69485300  | 1.35924000  |
| C | 2.74625300  | 4.67034600  | 1.51997900  |
| H | 3.31948400  | 3.60822600  | -0.22993300 |
| C | 1.76505500  | 4.87792700  | 2.48608600  |
| H | -0.20048000 | 4.33861400  | 3.14656700  |
| H | 3.67369500  | 5.22990000  | 1.53736200  |
| O | 1.86728300  | 5.75078400  | 3.52360100  |
| C | 3.05879500  | 6.50222800  | 3.61565300  |
| H | 2.95351300  | 7.13286700  | 4.49668800  |
| H | 3.93679300  | 5.85612200  | 3.73766600  |
| H | 3.20633100  | 7.13724700  | 2.73381900  |
| H | 1.74764000  | 1.43000900  | -2.64475000 |
| H | 2.33033300  | 2.98295500  | -2.09949100 |
| C | 3.50132800  | 1.26025300  | -1.46377400 |
| H | 4.22692400  | 1.40166200  | -2.26875200 |
| H | 3.95615200  | 1.62088100  | -0.53622300 |
| H | 3.35198500  | 0.18171700  | -1.35515300 |
| H | 1.22847700  | -1.05179300 | 3.19707400  |
| C | 2.56783100  | 0.39380800  | 2.37326400  |
| H | 2.47458700  | 1.33678700  | 1.82338800  |
| C | 3.13816400  | -0.67861300 | 1.46122400  |
| H | 4.12808400  | -0.40173600 | 1.08758300  |
| H | 3.24147500  | -1.62605200 | 2.00272100  |
| H | 2.49375700  | -0.85881600 | 0.59824300  |

|   |            |             |            |
|---|------------|-------------|------------|
| C | 3.51191400 | 0.63058400  | 3.54988200 |
| H | 4.52122000 | 0.84749100  | 3.19120500 |
| H | 3.20338000 | 1.47350000  | 4.17432000 |
| H | 3.57915900 | -0.25709900 | 4.18992400 |

### II'''(2b)

0 2

|    |             |             |             |
|----|-------------|-------------|-------------|
| Fe | 0.19309900  | -0.70355900 | -0.00797500 |
| N  | 0.56012100  | 0.13315800  | 1.71511400  |
| C  | 1.81995500  | 0.46413000  | 2.44268200  |
| C  | -0.41690100 | 0.58569600  | 2.46645600  |
| C  | 1.36893000  | 1.64292800  | 3.27650400  |
| H  | 2.02276700  | -0.38894200 | 3.11433000  |
| H  | 1.85981600  | 1.73956300  | 4.24435900  |
| N  | -1.65743800 | -1.22220100 | 0.53162000  |
| C  | -2.40476200 | -0.63780500 | 1.50502100  |
| C  | -3.60213400 | -2.47983200 | -0.20278200 |
| C  | -3.79828700 | -0.94143300 | 1.64903600  |
| C  | -4.36709300 | -1.90744600 | 0.77231800  |
| H  | -4.03087500 | -3.19558300 | -0.89553300 |
| H  | -5.41679700 | -2.15997700 | 0.88318800  |
| C  | -1.82678300 | 0.31281400  | 2.40796300  |
| C  | -4.56984400 | -0.28440000 | 2.61712300  |
| C  | -4.00326000 | 0.66430200  | 3.45542200  |
| H  | -4.60995700 | 1.17708100  | 4.19339900  |
| C  | -2.65298400 | 0.95193100  | 3.35264400  |
| H  | -2.20079300 | 1.67596000  | 4.01777000  |
| H  | -5.62674100 | -0.52507000 | 2.68590000  |
| O  | -0.02069800 | 1.37076700  | 3.50559100  |
| C  | -2.24953500 | -2.11265800 | -0.33552800 |
| C  | -1.40977100 | -2.57557300 | -1.38828400 |
| C  | 0.72421400  | -2.36000100 | -2.46735700 |
| C  | 1.87255300  | -3.08038800 | -2.07048900 |
| C  | 0.56307900  | -1.93849400 | -3.80150900 |
| C  | 2.85167100  | -3.35349200 | -3.02183100 |
| C  | 1.57598200  | -2.23723100 | -4.71666300 |
| C  | 2.71207100  | -2.93164700 | -4.33846100 |
| H  | 3.73914400  | -3.90566800 | -2.73143600 |
| H  | 1.46549200  | -1.91082100 | -5.74746700 |
| H  | 3.48808600  | -3.14813800 | -5.06538800 |
| H  | 1.45538200  | 2.59079200  | 2.72415500  |
| N  | -0.21414700 | -2.00051500 | -1.46164700 |
| C  | -1.87961700 | -3.64268200 | -2.32486000 |
| H  | -1.06208300 | -4.01449700 | -2.94346500 |
| H  | -2.30480300 | -4.48776000 | -1.77607400 |
| H  | -2.66329900 | -3.27179500 | -2.99443900 |
| C  | 1.25816200  | 0.50431800  | -1.22316900 |
| H  | 0.82482100  | 2.16965800  | 0.09474500  |
| C  | 1.02051400  | 2.00361900  | -0.97804200 |
| C  | 2.22487800  | 2.85328700  | -1.32457700 |
| C  | 2.69716600  | 3.83207700  | -0.45507700 |



|   |             |             |             |
|---|-------------|-------------|-------------|
| C | 2.90649800  | 2.68824300  | -2.53819700 |
| C | 3.80447100  | 4.62497200  | -0.75821400 |
| H | 2.18686300  | 3.98278600  | 0.49507500  |
| C | 4.00163700  | 3.46727800  | -2.86419200 |
| H | 2.57302900  | 1.92045400  | -3.23250100 |
| C | 4.46094300  | 4.44276500  | -1.97349300 |
| H | 4.14072400  | 5.37114700  | -0.04809400 |
| H | 4.52873600  | 3.33893200  | -3.80355300 |
| C | -0.22021600 | 2.52331800  | -1.72157500 |
| H | -0.36772500 | 3.57919000  | -1.46110900 |
| C | -1.48905000 | 1.73967800  | -1.43362400 |
| H | -2.36147500 | 2.19662100  | -1.90973300 |
| H | -1.41653700 | 0.70788300  | -1.79306600 |
| H | -1.69280800 | 1.69062800  | -0.35669700 |
| O | 5.55115200  | 5.15316500  | -2.38082100 |
| C | 6.03174100  | 6.14682400  | -1.50450600 |
| H | 5.27607600  | 6.91831300  | -1.31028100 |
| H | 6.35563000  | 5.72235400  | -0.54576300 |
| H | 6.88785500  | 6.60276500  | -1.99948100 |
| H | 1.00761500  | 0.24859000  | -2.26010800 |
| H | 2.32076500  | 0.25387100  | -1.10725300 |
| H | -0.01396700 | 2.51479800  | -2.80013200 |
| C | 3.06174100  | 0.70150200  | 1.59323300  |
| H | 2.78116600  | 1.35368900  | 0.76058300  |
| C | 4.13841100  | 1.41518500  | 2.40549200  |
| H | 3.82882000  | 2.41399500  | 2.72677300  |
| H | 4.40963500  | 0.84244300  | 3.30019400  |
| H | 5.04546400  | 1.53888500  | 1.80884400  |
| C | 3.59976000  | -0.60958300 | 1.04255800  |
| H | 4.00118500  | -1.23524900 | 1.84857400  |
| H | 2.81951800  | -1.18105500 | 0.53555000  |
| H | 4.40323700  | -0.43746200 | 0.32072100  |
| C | -0.65580800 | -1.17733500 | -4.29043900 |
| H | -1.33044300 | -1.02551200 | -3.44036700 |
| C | -1.40652700 | -1.96366500 | -5.36844500 |
| H | -2.33233900 | -1.45274300 | -5.64893600 |
| H | -0.79973000 | -2.05594700 | -6.27481200 |
| H | -1.66207800 | -2.97543500 | -5.04728500 |
| C | -0.28503100 | 0.20124200  | -4.83881300 |
| H | 0.28245600  | 0.78875200  | -4.11538600 |
| H | 0.32428700  | 0.11330200  | -5.74406300 |
| H | -1.18332500 | 0.76825200  | -5.10171100 |
| C | 1.99494500  | -3.59545600 | -0.65007700 |
| H | 1.60391600  | -2.80900000 | 0.01765400  |
| C | 1.11768300  | -4.83166400 | -0.43943800 |
| H | 1.42702500  | -5.64016400 | -1.11004500 |
| H | 1.20142800  | -5.19916800 | 0.58757300  |
| H | 0.06326000  | -4.62383600 | -0.63098400 |
| C | 3.42681700  | -3.89481800 | -0.22489100 |
| H | 3.82027300  | -4.78113300 | -0.73279600 |
| H | 4.10258800  | -3.06250400 | -0.43573800 |

|   |            |             |            |
|---|------------|-------------|------------|
| H | 3.46857300 | -4.09841200 | 0.84849900 |
|---|------------|-------------|------------|

### $\Pi'''(2c)$

0 2

|    |             |             |             |
|----|-------------|-------------|-------------|
| Fe | 0.69082800  | -0.39472900 | 0.24173600  |
| N  | 0.30606000  | 0.98570600  | 1.58663500  |
| C  | -0.77351900 | 0.99814200  | 2.31639700  |
| H  | 0.90353400  | 2.64533500  | 4.00046800  |
| N  | -1.13621900 | -0.93096000 | 0.16903200  |
| C  | -2.08441100 | -0.77590600 | 1.14402600  |
| C  | -2.71812800 | -2.27529700 | -1.11280100 |
| C  | -3.34724800 | -1.45269500 | 1.06087900  |
| C  | -3.63815000 | -2.20834900 | -0.10984600 |
| H  | -2.92430400 | -2.83188100 | -2.02072300 |
| H  | -4.59873900 | -2.70671800 | -0.18739600 |
| C  | -1.88509300 | 0.09572800  | 2.25932300  |
| C  | -4.27633600 | -1.34234500 | 2.10451300  |
| C  | -4.02903500 | -0.54662600 | 3.21416000  |
| H  | -4.75726600 | -0.47561600 | 4.01430500  |
| C  | -2.85647300 | 0.18414900  | 3.27323600  |
| H  | -2.66816200 | 0.85450400  | 4.10255700  |
| H  | -5.20974500 | -1.89109100 | 2.01620100  |
| O  | -0.88658700 | 2.03794500  | 3.17993500  |
| C  | -1.46021900 | -1.66076800 | -0.96586800 |
| C  | -0.41926800 | -1.77570000 | -1.90997800 |
| C  | 1.86850500  | -1.32113700 | -2.39674000 |
| C  | 2.55068500  | -2.49662600 | -2.78191900 |
| C  | 2.27012500  | -0.06297400 | -2.91544800 |
| C  | 3.63415100  | -2.36132400 | -3.66002900 |
| C  | 3.34441700  | 0.00351500  | -3.79765900 |
| C  | 4.03270200  | -1.14198300 | -4.17081100 |
| H  | 4.19563500  | -3.25548500 | -3.92225400 |
| H  | 3.64720800  | 0.96293500  | -4.20339500 |
| H  | 4.88174200  | -1.07991300 | -4.84410100 |
| H  | 0.05877500  | 3.85164700  | 3.00560000  |
| N  | 0.76691800  | -1.31513500 | -1.49074600 |
| C  | -0.68316600 | -2.33423400 | -3.27354900 |
| H  | 0.15657200  | -2.16555300 | -3.94836500 |
| H  | -0.87069900 | -3.41411600 | -3.24890000 |
| H  | -1.57029900 | -1.87386400 | -3.71950700 |
| C  | 1.46935000  | -1.62469100 | 1.51254900  |
| C  | 2.73296300  | -0.89844600 | 1.15695500  |
| H  | 1.12762100  | -1.46545800 | 2.53993200  |
| H  | 1.42044300  | -2.67915400 | 1.25065300  |
| C  | 1.48405000  | 1.19434100  | -2.58978700 |
| H  | 1.12040100  | 1.08856500  | -1.55442400 |
| C  | 2.31557900  | 2.46995300  | -2.64968400 |
| H  | 1.72460100  | 3.32619200  | -2.31172200 |
| H  | 3.20983500  | 2.40629100  | -2.01994700 |
| H  | 2.64235000  | 2.70060200  | -3.66793500 |
| C  | 0.25016800  | 1.31823600  | -3.48484500 |

|   |             |             |             |
|---|-------------|-------------|-------------|
| H | -0.40952200 | 0.45392700  | -3.38395900 |
| H | -0.32968200 | 2.21098600  | -3.23023200 |
| H | 0.54282200  | 1.39662500  | -4.53738800 |
| C | 1.03496800  | 2.24018800  | 1.84257100  |
| C | 0.32892400  | 2.79516900  | 3.08037300  |
| H | 2.07969400  | 2.01884600  | 2.07343000  |
| C | 1.03003700  | 3.14680900  | 0.60509700  |
| H | 1.56593900  | 2.57198000  | -0.16048800 |
| C | -0.37232700 | 3.43398600  | 0.08836700  |
| C | 1.82072300  | 4.42129400  | 0.86490500  |
| H | -0.97651100 | 3.96621500  | 0.83207600  |
| H | -0.33826400 | 4.06242000  | -0.80596200 |
| H | -0.90182800 | 2.51230700  | -0.17186600 |
| H | 1.32630600  | 5.06365000  | 1.60189700  |
| H | 2.82713900  | 4.20461100  | 1.23715500  |
| H | 1.92682200  | 5.01065600  | -0.04946100 |
| H | 2.46732900  | -0.02691700 | 0.42169200  |
| C | 2.29408000  | -3.94185600 | -2.34802500 |
| H | 3.28797300  | -4.29286800 | -2.03165700 |
| C | 1.89257500  | -4.81334800 | -3.54411700 |
| C | 1.36550600  | -4.21838800 | -1.17511800 |
| H | 2.60451300  | -4.74060100 | -4.36911900 |
| H | 1.83398200  | -5.86426000 | -3.24491500 |
| H | 0.91139600  | -4.52992400 | -3.93362800 |
| H | 1.54055800  | -3.53559600 | -0.34843300 |
| H | 0.30776100  | -4.14826500 | -1.44023400 |
| H | 1.53753900  | -5.23841900 | -0.81692500 |
| C | 3.35073200  | -0.18377200 | 2.37605600  |
| C | 3.79097200  | -1.67270000 | 0.40294500  |
| C | 4.05699800  | -3.00704900 | 0.69238900  |
| C | 4.60643400  | -1.03780200 | -0.54229400 |
| C | 5.06638400  | -3.71111200 | 0.03759600  |
| H | 3.45627500  | -3.52001800 | 1.43848500  |
| C | 5.61874500  | -1.71305800 | -1.19532600 |
| H | 4.41735300  | 0.00327200  | -0.79562100 |
| C | 5.84069800  | -3.06597600 | -0.92518300 |
| H | 5.22693400  | -4.75621900 | 0.27452600  |
| H | 6.22525100  | -1.22819200 | -1.95202700 |
| H | 2.53576800  | 0.26140400  | 2.95739800  |
| H | 3.77048300  | -0.96808000 | 3.01792700  |
| C | 4.41921700  | 0.84862800  | 2.05989300  |
| H | 5.31881200  | 0.38612900  | 1.64683200  |
| H | 4.06983500  | 1.57957300  | 1.31918200  |
| H | 4.71574300  | 1.40347900  | 2.95400100  |
| O | 6.81415000  | -3.66625000 | -1.66573400 |
| C | 7.00646000  | -5.04962500 | -1.46870300 |
| H | 7.79169300  | -5.35044000 | -2.16039500 |
| H | 7.32530600  | -5.27619800 | -0.44390400 |
| H | 6.09405800  | -5.61914600 | -1.68850800 |

**$\Pi'''(2d)$**

0 2

|    |             |             |             |
|----|-------------|-------------|-------------|
| Fe | -0.04881800 | -0.88304900 | 0.49028400  |
| N  | -0.27398600 | 0.62538100  | 1.76425600  |
| C  | -1.35786400 | 0.72977800  | 2.49023300  |
| H  | 0.49895700  | 2.04553800  | 4.43540900  |
| N  | -1.92291000 | -0.95843100 | 0.21266100  |
| C  | -2.90495300 | -0.63325200 | 1.09841800  |
| C  | -3.63060700 | -1.65042300 | -1.38556400 |
| C  | -4.27472200 | -0.97429500 | 0.83676100  |
| C  | -4.60214100 | -1.51363200 | -0.44534200 |
| H  | -3.86765100 | -2.00557400 | -2.38297500 |
| H  | -5.63568000 | -1.76590600 | -0.65809100 |
| C  | -2.61868500 | 0.08244600  | 2.29890200  |
| C  | -5.24270800 | -0.75013100 | 1.81633000  |
| C  | -4.92298000 | -0.14981800 | 3.03172800  |
| H  | -5.68928800 | 0.00707900  | 3.78266700  |
| C  | -3.63450500 | 0.28945800  | 3.25453800  |
| H  | -3.38350700 | 0.82556600  | 4.16095700  |
| H  | -6.26639600 | -1.04398900 | 1.60194600  |
| O  | -1.29228200 | 1.60203000  | 3.52256400  |
| C  | -2.28036900 | -1.37101200 | -1.07098900 |
| C  | -1.21146400 | -1.51941000 | -1.95418300 |
| C  | 1.18195800  | -1.47633200 | -2.19011000 |
| C  | 1.63332100  | -2.75312800 | -2.59443500 |
| C  | 1.93776900  | -0.31704400 | -2.51130900 |
| C  | 2.85556500  | -2.82453200 | -3.27724400 |
| C  | 3.13977300  | -0.45346200 | -3.19799400 |
| C  | 3.60708900  | -1.70515900 | -3.57672100 |
| H  | 3.23037000  | -3.80590400 | -3.55775900 |
| H  | 3.72012200  | 0.42927100  | -3.44402200 |
| H  | 4.55308900  | -1.80403100 | -4.09933000 |
| H  | -0.15674400 | 3.30619600  | 3.36986000  |
| N  | 0.00739600  | -1.28272400 | -1.41176000 |
| C  | -1.43136300 | -1.86869100 | -3.39304400 |
| H  | -0.50725700 | -1.80223600 | -3.96862200 |
| H  | -1.82880200 | -2.88167700 | -3.52520600 |
| H  | -2.15598600 | -1.18753500 | -3.85058300 |
| C  | 0.64091000  | -2.20732400 | 1.77570600  |
| C  | 1.94414100  | -1.66731900 | 1.28518100  |
| C  | 2.76067400  | -2.71101400 | 0.50242900  |
| H  | 0.32832900  | -1.91426000 | 2.77824000  |
| H  | 0.46056000  | -3.26605900 | 1.59119000  |
| C  | 1.40196200  | 1.06159400  | -2.17538900 |
| H  | 0.91351900  | 0.98380700  | -1.19562100 |
| C  | 2.47963000  | 2.13521500  | -2.08415200 |
| H  | 2.05174900  | 3.07053800  | -1.71230400 |
| H  | 3.29324000  | 1.84923000  | -1.40935300 |
| H  | 2.92277100  | 2.35846000  | -3.05996000 |
| C  | 0.32170700  | 1.48038500  | -3.17540400 |
| H  | -0.51313600 | 0.77674100  | -3.18365200 |
| H  | -0.07929800 | 2.46726000  | -2.92395000 |

|   |             |             |             |
|---|-------------|-------------|-------------|
| H | 0.72964700  | 1.53303400  | -4.19067800 |
| C | 2.83120000  | -0.91865300 | 2.25831600  |
| C | 2.76932100  | -1.10834000 | 3.64071500  |
| C | 3.77641900  | -0.01893900 | 1.76711700  |
| C | 3.58743400  | -0.39274300 | 4.50096700  |
| H | 2.06148000  | -1.82318500 | 4.04940200  |
| C | 4.61051600  | 0.70556200  | 2.61164500  |
| H | 3.84644200  | 0.14061800  | 0.69159900  |
| C | 4.50680400  | 0.52907800  | 3.99359900  |
| H | 3.53599800  | -0.53167300 | 5.57537800  |
| H | 5.32273100  | 1.40514000  | 2.19051500  |
| O | 5.25049200  | 1.19814100  | 4.91412200  |
| C | 6.17470400  | 2.14903400  | 4.42881700  |
| H | 6.65584500  | 2.57956900  | 5.30516500  |
| H | 6.93705700  | 1.68564600  | 3.79121800  |
| H | 5.67599000  | 2.94636600  | 3.86358200  |
| H | 3.50399900  | -2.21242300 | -0.13180400 |
| C | 0.71585500  | 1.58327400  | 2.29120700  |
| C | -0.00143700 | 2.22766600  | 3.48075000  |
| H | 1.58921900  | 1.03375700  | 2.64492500  |
| C | 1.18888600  | 2.54996000  | 1.20125400  |
| H | 1.72191300  | 1.92067500  | 0.47614300  |
| C | 0.02893000  | 3.22869600  | 0.48701100  |
| C | 2.18463300  | 3.55333200  | 1.76710000  |
| H | -0.58648200 | 3.81207300  | 1.18200600  |
| H | 0.38733100  | 3.92221900  | -0.27857100 |
| H | -0.62367800 | 2.49637900  | 0.00263000  |
| H | 1.70445000  | 4.25657500  | 2.45681400  |
| H | 2.99252500  | 3.05237000  | 2.31074700  |
| H | 2.63644500  | 4.14849000  | 0.96874600  |
| H | 1.72552200  | -0.83353800 | 0.48644900  |
| H | 2.07956800  | -3.22564700 | -0.17579600 |
| C | 3.43702500  | -3.72176500 | 1.41190500  |
| H | 4.19180500  | -3.25369600 | 2.04990700  |
| H | 2.71130900  | -4.21219200 | 2.06845700  |
| H | 3.93404500  | -4.49998200 | 0.82769300  |
| C | 1.00002300  | -4.12745400 | -2.33501400 |
| H | 1.83625900  | -4.71912000 | -1.93037200 |
| C | 0.60753400  | -4.80212000 | -3.65480600 |
| C | -0.13861200 | -4.28540100 | -1.32950500 |
| H | 0.27587200  | -5.82862500 | -3.47302000 |
| H | -0.21580100 | -4.27264800 | -4.14079900 |
| H | 1.43663400  | -4.83937600 | -4.36446300 |
| H | 0.00580500  | -3.71003400 | -0.41521800 |
| H | -1.10809900 | -3.99810100 | -1.74049100 |
| H | -0.21536600 | -5.34140900 | -1.05373700 |

### III'(Doublet)

0 2

|    |            |            |             |
|----|------------|------------|-------------|
| Fe | 0.27558900 | 0.24905500 | -0.12950900 |
| N  | 0.14447100 | 0.40824100 | 1.77899700  |

|   |             |             |             |
|---|-------------|-------------|-------------|
| C | 1.22159000  | 0.74601000  | 2.71368500  |
| C | -0.94945500 | 0.24722100  | 2.47899900  |
| C | 0.63848400  | 0.34679800  | 4.05781600  |
| H | 2.13500200  | 0.20348400  | 2.46232800  |
| H | 0.94064400  | -0.66350000 | 4.36008900  |
| N | -1.71410100 | 0.20828800  | -0.35131900 |
| C | -2.64253400 | 0.00827100  | 0.62315900  |
| C | -3.43996000 | 0.00320000  | -2.04342800 |
| C | -4.01676900 | -0.22565000 | 0.29115600  |
| C | -4.38290000 | -0.21864300 | -1.08216000 |
| H | -3.71167500 | -0.00075900 | -3.09317400 |
| H | -5.41968000 | -0.40331300 | -1.34635600 |
| C | -2.28467300 | 0.00895300  | 2.01303200  |
| C | -4.96263300 | -0.47209900 | 1.29676600  |
| C | -4.59539500 | -0.47682500 | 2.63342700  |
| H | -5.33180400 | -0.66932200 | 3.40563400  |
| C | -3.27657400 | -0.23459300 | 2.98093700  |
| H | -2.98096700 | -0.23441200 | 4.02242800  |
| H | -5.98982500 | -0.66597500 | 1.00213100  |
| O | -0.78106100 | 0.33738000  | 3.82601400  |
| C | -2.09564400 | 0.20588000  | -1.67273600 |
| C | -1.03944200 | 0.36686400  | -2.61818900 |
| C | 1.33551500  | 0.50205100  | -2.90571600 |
| C | 1.58272200  | -0.38223300 | -3.96208000 |
| C | 2.31779300  | 1.44013800  | -2.56827200 |
| C | 2.77651900  | -0.31433600 | -4.67145500 |
| C | 3.50110000  | 1.51148500  | -3.28645500 |
| C | 3.73801300  | 0.63460800  | -4.34311100 |
| H | 2.95832700  | -1.01551100 | -5.47990400 |
| H | 4.24921200  | 2.24956300  | -3.01535900 |
| H | 4.66923800  | 0.68374700  | -4.89697200 |
| H | 0.84452700  | -1.14151100 | -4.20301700 |
| H | 2.13478500  | 2.09969300  | -1.72410900 |
| H | 1.44162700  | 1.81913300  | 2.64710500  |
| H | 0.84374500  | 1.03950000  | 4.87377900  |
| N | 0.18655100  | 0.41480400  | -2.10006200 |
| C | -1.34317100 | 0.50344500  | -4.07710800 |
| H | -0.52242200 | 0.98178600  | -4.61108000 |
| H | -1.51743100 | -0.46873800 | -4.55517600 |
| H | -2.24297800 | 1.10187600  | -4.23308800 |
| C | 2.02090500  | -0.76242500 | -0.10453600 |
| H | 2.40593900  | -0.95840400 | -1.11409000 |
| H | 2.81221500  | -0.21436900 | 0.42890000  |
| C | 1.69747800  | -2.08898000 | 0.59713600  |
| H | 1.60353100  | -1.90675000 | 1.68054400  |
| C | 2.79656100  | -3.14536300 | 0.40823400  |
| H | 2.89416100  | -3.35703000 | -0.66516600 |
| H | 3.75474200  | -2.70369300 | 0.70967600  |
| C | 2.54700700  | -4.43376500 | 1.17318500  |
| H | 3.35862800  | -5.15334500 | 1.03789200  |
| H | 2.45214400  | -4.24430900 | 2.24801400  |

|   |             |             |             |
|---|-------------|-------------|-------------|
| H | 1.61985700  | -4.91557900 | 0.84871800  |
| C | 0.34140500  | -2.59125100 | 0.13198100  |
| C | -0.69625000 | -2.86938500 | 1.02618000  |
| C | 0.06408300  | -2.71540900 | -1.23139100 |
| C | -1.96350200 | -3.22029300 | 0.58591700  |
| H | -0.51181400 | -2.77933500 | 2.09565500  |
| C | -1.19806200 | -3.06617100 | -1.69705800 |
| H | 0.84895000  | -2.49508200 | -1.95174200 |
| C | -2.22731800 | -3.30319400 | -0.78190100 |
| H | -2.77502400 | -3.40345200 | 1.28255400  |
| H | -1.37544100 | -3.12870700 | -2.76524200 |
| O | -3.51143200 | -3.60809300 | -1.12469000 |
| C | -3.80797200 | -3.67021300 | -2.50077300 |
| H | -3.23708900 | -4.45967300 | -3.00573000 |
| H | -4.87105500 | -3.89624800 | -2.57430500 |
| H | -3.60835700 | -2.71290100 | -3.00087000 |
| H | -0.50525400 | 2.80256400  | -0.15648000 |
| H | -0.52034900 | 3.54498800  | -0.26075700 |

#### IV' (Doublet)

0 2

|    |             |             |             |
|----|-------------|-------------|-------------|
| Fe | 0.55288800  | 0.65126700  | 0.03483700  |
| N  | 0.75604000  | 0.92014600  | 1.93316300  |
| C  | 2.01452500  | 1.16179600  | 2.64414100  |
| C  | -0.15219700 | 0.61615000  | 2.82565100  |
| C  | 1.73391500  | 0.62229300  | 4.03793800  |
| H  | 2.84215300  | 0.64732900  | 2.15049600  |
| H  | 2.12108900  | -0.39268000 | 4.18300400  |
| N  | -1.35814000 | 0.55394200  | 0.17449100  |
| C  | -2.12139400 | 0.42867500  | 1.29826700  |
| C  | -3.39545700 | 0.47531900  | -1.18224800 |
| C  | -3.55129200 | 0.31007100  | 1.21463600  |
| C  | -4.16574800 | 0.36947600  | -0.07175600 |
| H  | -3.84754900 | 0.47245400  | -2.16798800 |
| H  | -5.24558000 | 0.28633300  | -0.13848000 |
| C  | -1.54194700 | 0.38188900  | 2.60658800  |
| C  | -4.30821600 | 0.09822300  | 2.36763900  |
| C  | -3.71684500 | 0.00113000  | 3.62447700  |
| H  | -4.32358100 | -0.17624000 | 4.50531100  |
| C  | -2.35203500 | 0.14758300  | 3.73944500  |
| H  | -1.87173900 | 0.10027500  | 4.70838800  |
| H  | -5.38431200 | -0.00504400 | 2.25859300  |
| O  | 0.29693800  | 0.56001600  | 4.10098300  |
| C  | -1.98793900 | 0.56413200  | -1.07811900 |
| C  | -1.11821900 | 0.67903600  | -2.15783900 |
| C  | 1.19914000  | 0.82845900  | -2.78525400 |
| C  | 1.36895500  | -0.24700500 | -3.66539900 |
| C  | 2.08887500  | 1.90496600  | -2.86127300 |
| C  | 2.40485500  | -0.24469300 | -4.59083100 |
| C  | 3.12219200  | 1.90384000  | -3.78912800 |

|   |             |             |             |
|---|-------------|-------------|-------------|
| C | 3.28730200  | 0.82915100  | -4.65763600 |
| H | 2.52695700  | -1.09077100 | -5.25996400 |
| H | 3.79924700  | 2.75090800  | -3.83826100 |
| H | 4.09561300  | 0.82878400  | -5.38100900 |
| H | 0.68309000  | -1.08631600 | -3.60520800 |
| H | 1.94518800  | 2.74404900  | -2.18725700 |
| H | 2.23908900  | 2.23495300  | 2.64187300  |
| H | 2.08039800  | 1.25593800  | 4.85420500  |
| N | 0.18562800  | 0.82220000  | -1.79976200 |
| C | -1.56764900 | 0.68758500  | -3.58144700 |
| H | -0.92075300 | 1.31754300  | -4.19630400 |
| H | -1.55610700 | -0.31406100 | -4.02921800 |
| H | -2.58541400 | 1.06937100  | -3.67257400 |
| C | 1.24971100  | -1.27010800 | 0.12351200  |
| H | 1.59039500  | -1.52949100 | -0.88666900 |
| H | 2.14109600  | -1.26291200 | 0.76737800  |
| C | 0.25332800  | -2.28140000 | 0.66926600  |
| H | -0.16164600 | -1.88975800 | 1.61475700  |
| C | 0.97298100  | -3.60179900 | 1.02502700  |
| H | 1.40498900  | -4.01976600 | 0.10572600  |
| H | 1.82556800  | -3.36271900 | 1.67395400  |
| C | 0.08678700  | -4.63346200 | 1.70074700  |
| H | 0.65224800  | -5.52592400 | 1.98097900  |
| H | -0.36561300 | -4.23003400 | 2.61300700  |
| H | -0.73073400 | -4.95050900 | 1.04781500  |
| C | -0.92036100 | -2.53429300 | -0.24716600 |
| C | -2.21570200 | -2.65624300 | 0.26880900  |
| C | -0.76326900 | -2.68423900 | -1.62137300 |
| C | -3.30815900 | -2.86915100 | -0.55189100 |
| H | -2.36956600 | -2.55436000 | 1.34159400  |
| C | -1.85032800 | -2.88941600 | -2.47011100 |
| H | 0.23219600  | -2.63109900 | -2.05322200 |
| C | -3.13529000 | -2.95935900 | -1.93428100 |
| H | -4.31422400 | -2.92560000 | -0.14967100 |
| H | -1.68443200 | -2.98367600 | -3.53759800 |
| O | -4.27676300 | -3.09799300 | -2.66916200 |
| C | -4.13486700 | -3.11130700 | -4.07084100 |
| H | -3.53746700 | -3.96495600 | -4.41494300 |
| H | -5.14067500 | -3.19428600 | -4.48010400 |
| H | -3.67114900 | -2.18625800 | -4.43909100 |
| H | 1.95284900  | 1.48922900  | -0.16876200 |
| H | 2.18614200  | 0.69000400  | -0.19833000 |

**TS<sub>4</sub> (Doublet)**

0 2

|    |            |             |            |
|----|------------|-------------|------------|
| Fe | 0.34017800 | 0.10624600  | 0.36202500 |
| N  | 1.37627500 | 0.71528600  | 1.90750900 |
| C  | 2.82114700 | 0.54666700  | 2.07654800 |
| C  | 0.85836700 | 0.87688700  | 3.09761800 |
| C  | 3.06232600 | 0.96950900  | 3.51877600 |
| H  | 3.08336800 | -0.50268900 | 1.89105100 |



|   |             |             |             |
|---|-------------|-------------|-------------|
| H | 3.71708800  | 0.30757600  | 4.08600400  |
| N | -1.30058500 | 0.78866500  | 1.15628300  |
| C | -1.56408400 | 1.03188100  | 2.46446600  |
| C | -3.61021600 | 1.29120000  | 0.59459000  |
| C | -2.89868800 | 1.32730400  | 2.90406300  |
| C | -3.91948700 | 1.43191200  | 1.91313800  |
| H | -4.37236100 | 1.41603500  | -0.16628500 |
| H | -4.93336100 | 1.65287200  | 2.23095100  |
| C | -0.52412900 | 1.00981600  | 3.45064600  |
| C | -3.16336400 | 1.50382200  | 4.26411700  |
| C | -2.15002000 | 1.42339200  | 5.21312800  |
| H | -2.37394700 | 1.56093600  | 6.26508100  |
| C | -0.84865000 | 1.19620800  | 4.80826000  |
| H | -0.04508000 | 1.17366100  | 5.53337000  |
| H | -4.18524700 | 1.71368500  | 4.56710300  |
| O | 1.75309800  | 0.92060200  | 4.11617200  |
| C | -2.28661200 | 0.98497100  | 0.20353200  |
| C | -1.84204100 | 0.87727700  | -1.13182800 |
| C | 0.05171500  | 0.67018000  | -2.57135200 |
| C | 0.76062500  | -0.42517500 | -3.07158400 |
| C | -0.04399600 | 1.82594100  | -3.35507600 |
| C | 1.33138100  | -0.37413300 | -4.33513300 |
| C | 0.54289300  | 1.87629000  | -4.61327400 |
| C | 1.22851500  | 0.77491900  | -5.11481500 |
| H | 1.85974200  | -1.24470700 | -4.71362100 |
| H | 0.46531800  | 2.78438500  | -5.20318000 |
| H | 1.68039800  | 0.81299800  | -6.10028900 |
| H | 0.83803200  | -1.31978700 | -2.46416200 |
| H | -0.56764000 | 2.69016000  | -2.95791400 |
| H | 3.36632000  | 1.15186000  | 1.35048500  |
| H | 3.43419300  | 1.99600800  | 3.60546900  |
| N | -0.52427700 | 0.62992900  | -1.28094100 |
| C | -2.78731200 | 1.00850300  | -2.28620500 |
| H | -2.93902000 | 2.05052600  | -2.58953600 |
| H | -2.41289200 | 0.47340300  | -3.16065500 |
| H | -3.77015800 | 0.60227900  | -2.03704400 |
| C | 0.17994400  | -1.96311400 | 0.84501300  |
| H | 0.96059900  | -2.73614700 | 0.78587000  |
| H | 0.07660800  | -1.73459500 | 1.91285200  |
| C | -1.12623400 | -2.50587100 | 0.27239600  |
| H | -1.89333700 | -1.72027600 | 0.34758000  |
| C | -1.62436300 | -3.70160900 | 1.10558900  |
| H | -0.87786500 | -4.50595800 | 1.04987500  |
| H | -1.66079000 | -3.39694500 | 2.15876700  |
| C | -2.98313800 | -4.22072800 | 0.66998400  |
| H | -3.32680100 | -5.03707300 | 1.30979900  |
| H | -3.73853200 | -3.42906900 | 0.71201200  |
| H | -2.95917800 | -4.59223900 | -0.35836100 |
| C | -1.00704200 | -2.86230000 | -1.19109700 |
| C | -1.92657100 | -2.37476800 | -2.12462000 |
| C | 0.00627300  | -3.69383700 | -1.66332100 |

|   |             |             |             |
|---|-------------|-------------|-------------|
| C | -1.81788000 | -2.66321000 | -3.47373000 |
| H | -2.74067800 | -1.74418600 | -1.77511900 |
| C | 0.13639400  | -3.99913300 | -3.01692800 |
| H | 0.72951800  | -4.11056200 | -0.96611500 |
| C | -0.77198700 | -3.46724300 | -3.93248800 |
| H | -2.52063200 | -2.26505000 | -4.19802600 |
| H | 0.94673200  | -4.63944800 | -3.34456300 |
| O | -0.72169600 | -3.66782100 | -5.27773800 |
| C | 0.33830900  | -4.45617800 | -5.77122000 |
| H | 0.30347800  | -5.47921100 | -5.37663600 |
| H | 0.21717700  | -4.48698000 | -6.85278700 |
| H | 1.31520700  | -4.01793300 | -5.53106600 |
| H | 1.66162000  | -0.25586300 | -0.36670900 |
| H | 1.12729500  | -1.17626200 | 0.02797000  |

Imaginary Frequency: -1107.11

### V' (Doublet)

0 2

|    |             |             |             |
|----|-------------|-------------|-------------|
| Fe | -0.15242900 | 0.26398700  | 0.01647100  |
| N  | -0.41818100 | -0.34043900 | 1.84950600  |
| C  | 0.63520400  | -0.92138800 | 2.68360600  |
| C  | -1.51932100 | -0.31444100 | 2.53996700  |
| C  | -0.10953300 | -1.38637200 | 3.93210400  |
| H  | 1.13193000  | -1.73476800 | 2.14672300  |
| H  | -0.21501800 | -2.47363400 | 3.99456700  |
| N  | -2.12026900 | 0.71626600  | -0.13412100 |
| C  | -3.08793400 | 0.65757800  | 0.81561000  |
| C  | -3.74067800 | 1.51644600  | -1.74735500 |
| C  | -4.43500000 | 1.05661800  | 0.52211000  |
| C  | -4.72511800 | 1.49161200  | -0.80022400 |
| H  | -3.96461600 | 1.82647600  | -2.76126100 |
| H  | -5.74034500 | 1.79060200  | -1.04106500 |
| C  | -2.81614500 | 0.17518000  | 2.13827800  |
| C  | -5.42322700 | 1.00515900  | 1.51456200  |
| C  | -5.13384700 | 0.55485100  | 2.79258000  |
| H  | -5.90582900 | 0.51942700  | 3.55264300  |
| C  | -3.84599600 | 0.13749100  | 3.09137800  |
| H  | -3.61085900 | -0.23269200 | 4.08117700  |
| H  | -6.42868500 | 1.32480700  | 1.25555900  |
| O  | -1.43186200 | -0.82604700 | 3.78728000  |
| C  | -2.42956000 | 1.12501000  | -1.41367500 |
| C  | -1.35631600 | 1.08170000  | -2.35980400 |
| C  | 0.91229400  | 0.42035700  | -2.73993000 |
| C  | 0.75329000  | -0.46514400 | -3.81162200 |
| C  | 2.18293900  | 0.94006000  | -2.47121200 |
| C  | 1.84173300  | -0.81856400 | -4.59939500 |
| C  | 3.26088600  | 0.59913200  | -3.27442500 |
| C  | 3.09911000  | -0.28388800 | -4.34096400 |
| H  | 1.70338400  | -1.52713500 | -5.41102200 |
| H  | 4.24002900  | 1.01506000  | -3.05869800 |
| H  | 3.94919500  | -0.56015100 | -4.95597200 |

|   |             |             |             |
|---|-------------|-------------|-------------|
| H | -0.22211100 | -0.90627200 | -3.99196800 |
| H | 2.30342400  | 1.59211300  | -1.61365800 |
| H | 1.39760300  | -0.16291000 | 2.88597800  |
| H | 0.30779900  | -1.01868500 | 4.87051800  |
| N | -0.16519900 | 0.72043100  | -1.87953400 |
| C | -1.60218800 | 1.44448500  | -3.79050400 |
| H | -0.66889400 | 1.64519700  | -4.31505900 |
| H | -2.11884400 | 0.64245900  | -4.33279000 |
| H | -2.22846400 | 2.33675600  | -3.86293400 |
| C | 1.94354300  | -2.93985400 | -1.02868600 |
| H | 2.28855100  | -3.81236500 | -1.59360000 |
| H | 2.58087600  | -2.85361400 | -0.14370000 |
| C | 0.48061500  | -3.07079600 | -0.62464600 |
| H | 0.23925100  | -2.19718100 | 0.00236200  |
| C | 0.24541200  | -4.31147200 | 0.24876900  |
| H | 0.41851300  | -5.21353400 | -0.35406400 |
| H | 1.01174200  | -4.32870400 | 1.03583700  |
| C | -1.13639800 | -4.35892100 | 0.87720600  |
| H | -1.25137900 | -5.21626100 | 1.54495800  |
| H | -1.33412600 | -3.45274900 | 1.46282100  |
| H | -1.92125400 | -4.42397000 | 0.11871400  |
| C | -0.46200200 | -3.01470200 | -1.80666100 |
| C | -1.65301600 | -2.28431200 | -1.72687400 |
| C | -0.19613700 | -3.67475200 | -3.00455300 |
| C | -2.51887600 | -2.17591900 | -2.80234100 |
| H | -1.89663100 | -1.77241600 | -0.79757600 |
| C | -1.05553700 | -3.58892900 | -4.09825700 |
| H | 0.71654600  | -4.25527300 | -3.10823000 |
| C | -2.21699200 | -2.82058700 | -4.00440200 |
| H | -3.43117900 | -1.59131800 | -2.73596100 |
| H | -0.80313700 | -4.10625600 | -5.01630000 |
| O | -3.10340600 | -2.62750600 | -5.02218000 |
| C | -2.81111900 | -3.25005300 | -6.25401600 |
| H | -2.77596800 | -4.34225600 | -6.15980300 |
| H | -3.61720600 | -2.97647700 | -6.93286500 |
| H | -1.85706100 | -2.90044100 | -6.66851100 |
| H | 1.39657400  | 0.06987100  | 0.09719100  |
| H | 2.10752800  | -2.04941200 | -1.64099100 |

### III' (Quartet)

0 4

|    |             |             |             |
|----|-------------|-------------|-------------|
| Fe | 0.27014800  | 0.04263600  | -0.22092500 |
| N  | 0.13364400  | 0.44512800  | 1.68597300  |
| C  | 1.21668400  | 0.83044100  | 2.59247200  |
| C  | -0.94073700 | 0.24331400  | 2.41312400  |
| C  | 0.67861500  | 0.43421400  | 3.95694000  |
| H  | 2.14344700  | 0.31529600  | 2.33362000  |
| H  | 1.03798800  | -0.54923200 | 4.28226600  |
| N  | -1.71922700 | 0.12066400  | -0.38891100 |
| C  | -2.63902200 | -0.04483600 | 0.58965600  |
| C  | -3.48472600 | 0.03780900  | -2.06206400 |

|   |             |             |             |
|---|-------------|-------------|-------------|
| C | -4.02648300 | -0.25295400 | 0.27622300  |
| C | -4.41262000 | -0.19870800 | -1.09763800 |
| H | -3.77764100 | 0.08572300  | -3.10539700 |
| H | -5.45844200 | -0.34620800 | -1.34908800 |
| C | -2.26962900 | -0.03909000 | 1.97695800  |
| C | -4.94799100 | -0.50575800 | 1.29061900  |
| C | -4.56061800 | -0.54414300 | 2.63002900  |
| H | -5.29030300 | -0.74828400 | 3.40554400  |
| C | -3.24569800 | -0.30290100 | 2.96365100  |
| H | -2.93457300 | -0.30553200 | 4.00066900  |
| H | -5.98506900 | -0.67357900 | 1.01385600  |
| O | -0.74334800 | 0.34021300  | 3.74979200  |
| C | -2.11938900 | 0.18781800  | -1.71787800 |
| C | -1.08104300 | 0.36368000  | -2.64552300 |
| C | 1.31761600  | 0.57089300  | -2.88795900 |
| C | 1.59906100  | -0.30617300 | -3.94373600 |
| C | 2.28457000  | 1.51838900  | -2.52875600 |
| C | 2.80531700  | -0.22116400 | -4.62904100 |
| C | 3.48526200  | 1.60057400  | -3.21724200 |
| C | 3.75264900  | 0.73309300  | -4.27405500 |
| H | 3.00952000  | -0.91404200 | -5.43950200 |
| H | 4.21973000  | 2.34536800  | -2.92731300 |
| H | 4.69379800  | 0.79544500  | -4.80953900 |
| H | 0.87475500  | -1.07187000 | -4.20519600 |
| H | 2.07044100  | 2.18195300  | -1.69504200 |
| H | 1.39971200  | 1.90936500  | 2.50674100  |
| H | 0.85568000  | 1.15875200  | 4.75159500  |
| N | 0.15503800  | 0.47132300  | -2.10477100 |
| C | -1.34944200 | 0.48325000  | -4.11226600 |
| H | -0.56260400 | 1.04829900  | -4.61385600 |
| H | -1.41125100 | -0.49206900 | -4.61207200 |
| H | -2.29485100 | 0.99673800  | -4.29572300 |
| C | 2.06883500  | -0.85724800 | -0.11080600 |
| H | 2.42491800  | -1.06033500 | -1.12986400 |
| H | 2.84683900  | -0.27129700 | 0.39457300  |
| C | 1.74037900  | -2.16646400 | 0.61354700  |
| H | 1.65783300  | -1.96597200 | 1.69460400  |
| C | 2.80865900  | -3.25312100 | 0.42690400  |
| H | 2.89431900  | -3.47389200 | -0.64548500 |
| H | 3.77989200  | -2.83652900 | 0.72139100  |
| C | 2.52447500  | -4.52809300 | 1.20177400  |
| H | 3.31411700  | -5.27154900 | 1.06732600  |
| H | 2.44039600  | -4.32910000 | 2.27560000  |
| H | 1.58252700  | -4.98516300 | 0.88422200  |
| C | 0.36389400  | -2.62457800 | 0.15521800  |
| C | -0.67426900 | -2.89777400 | 1.05414300  |
| C | 0.07396900  | -2.72254700 | -1.21094500 |
| C | -1.94724900 | -3.22265200 | 0.61611400  |
| H | -0.48138900 | -2.82503500 | 2.12326500  |
| C | -1.19627500 | -3.05190400 | -1.67220600 |
| H | 0.85849400  | -2.51509900 | -1.93521700 |

|   |             |             |             |
|---|-------------|-------------|-------------|
| C | -2.22110500 | -3.28717500 | -0.75271600 |
| H | -2.75887800 | -3.39598000 | 1.31497300  |
| H | -1.38149300 | -3.09691900 | -2.73936200 |
| O | -3.50659800 | -3.57532700 | -1.08839700 |
| C | -3.81817300 | -3.61050500 | -2.46437000 |
| H | -3.26546100 | -4.40254800 | -2.98473000 |
| H | -4.88544600 | -3.81743500 | -2.52881100 |
| H | -3.60804500 | -2.64809500 | -2.94837400 |
| H | -0.61587400 | 2.74042000  | -0.05467100 |
| H | -0.66521200 | 3.48626800  | 0.00356800  |

#### IV' (Quartet)

0 4

|    |             |             |             |
|----|-------------|-------------|-------------|
| Fe | 0.33144300  | -0.14868400 | -0.70650600 |
| N  | -0.34565700 | -0.02464000 | 1.19128000  |
| C  | 0.51074300  | -0.03380400 | 2.37883400  |
| C  | -1.54648500 | -0.38412200 | 1.56285700  |
| C  | -0.41701100 | -0.46888300 | 3.51256400  |
| H  | 1.34269000  | -0.73134800 | 2.22847500  |
| H  | -0.14118800 | -1.42979600 | 3.95529600  |
| N  | -1.63194600 | 0.06998100  | -1.31591800 |
| C  | -2.75919100 | -0.25630500 | -0.64586500 |
| C  | -2.92522800 | 0.44874500  | -3.32994400 |
| C  | -4.02429300 | -0.33552900 | -1.32213800 |
| C  | -4.05487600 | 0.01544800  | -2.70448700 |
| H  | -2.95671400 | 0.74783700  | -4.37146100 |
| H  | -5.00007100 | -0.04268300 | -3.23538400 |
| C  | -2.73182500 | -0.53118400 | 0.76143100  |
| C  | -5.16912900 | -0.73214500 | -0.62750100 |
| C  | -5.11334800 | -1.03666000 | 0.72860200  |
| H  | -6.00899300 | -1.34464500 | 1.25766100  |
| C  | -3.91465000 | -0.92956400 | 1.41051500  |
| H  | -3.86856500 | -1.15546300 | 2.46818800  |
| H  | -6.11125600 | -0.78403300 | -1.16648600 |
| O  | -1.69894200 | -0.62532600 | 2.88519900  |
| C  | -1.69920400 | 0.49749000  | -2.62334900 |
| C  | -0.47688300 | 0.96273700  | -3.17616800 |
| C  | 1.85445900  | 1.35676600  | -2.75048700 |
| C  | 2.50721600  | 0.66571100  | -3.77963600 |
| C  | 2.55293500  | 2.35333800  | -2.05985800 |
| C  | 3.81907700  | 0.97571700  | -4.11288100 |
| C  | 3.86082900  | 2.66608300  | -2.40392800 |
| C  | 4.50120800  | 1.97976100  | -3.43170100 |
| H  | 4.31480100  | 0.42373100  | -4.90535900 |
| H  | 4.38510200  | 3.44840300  | -1.86404200 |
| H  | 5.52570500  | 2.21990700  | -3.69502900 |
| H  | 1.98320400  | -0.13543200 | -4.29212800 |
| H  | 2.04683700  | 2.87472700  | -1.25281500 |
| H  | 0.94354800  | 0.95934800  | 2.53811200  |
| H  | -0.52129500 | 0.27112600  | 4.30938900  |
| N  | 0.55530400  | 1.02219900  | -2.32070700 |

|   |             |             |             |
|---|-------------|-------------|-------------|
| C | -0.39133000 | 1.40707800  | -4.60395800 |
| H | 0.45921100  | 2.07134000  | -4.75969200 |
| H | -0.27796500 | 0.56773400  | -5.29963300 |
| H | -1.29314700 | 1.94642300  | -4.90042900 |
| C | 1.55928600  | -1.70641600 | -1.20263100 |
| H | 1.12434600  | -2.09582500 | -2.13744000 |
| H | 2.55460300  | -1.32536500 | -1.46893100 |
| C | 1.66106400  | -2.80859600 | -0.15343700 |
| H | 2.25023600  | -2.42210900 | 0.69570200  |
| C | 2.42066600  | -4.03769800 | -0.69367200 |
| H | 1.84254300  | -4.45385700 | -1.52984200 |
| H | 3.36497200  | -3.68769700 | -1.12827400 |
| C | 2.69305400  | -5.11680400 | 0.33970600  |
| H | 3.26836400  | -5.94411700 | -0.08379100 |
| H | 3.26541700  | -4.72058400 | 1.18555700  |
| H | 1.76499400  | -5.53251300 | 0.74236200  |
| C | 0.30854400  | -3.20647500 | 0.40047600  |
| C | 0.12022100  | -3.43940900 | 1.76677800  |
| C | -0.79955700 | -3.36586100 | -0.43179000 |
| C | -1.11408000 | -3.80366500 | 2.28318200  |
| H | 0.96935100  | -3.33543400 | 2.44096000  |
| C | -2.04500700 | -3.74477800 | 0.06206600  |
| H | -0.69867800 | -3.17947500 | -1.49792700 |
| C | -2.20832400 | -3.96054300 | 1.43041900  |
| H | -1.25923000 | -3.97000400 | 3.34566500  |
| H | -2.88426900 | -3.83328100 | -0.61834100 |
| O | -3.38407000 | -4.30644800 | 2.02460200  |
| C | -4.47299400 | -4.59339300 | 1.17116300  |
| H | -4.23510000 | -5.41094400 | 0.47947500  |
| H | -5.29316200 | -4.89922200 | 1.81940100  |
| H | -4.77959100 | -3.71310900 | 0.59380200  |
| H | 2.77756500  | 0.34238200  | 0.21254100  |
| H | 3.16837400  | 0.74205300  | 0.71245400  |

#### TS<sub>4</sub> (Quartet)

0 4

|    |             |             |             |
|----|-------------|-------------|-------------|
| Fe | 0.35938800  | 0.00789200  | 0.36529600  |
| N  | 1.50436100  | 0.66844100  | 1.88347600  |
| C  | 2.95883000  | 0.62677100  | 2.00034700  |
| C  | 1.01140700  | 0.93926600  | 3.05803700  |
| C  | 3.22392500  | 1.15186200  | 3.40830600  |
| H  | 3.30631300  | -0.40409600 | 1.85718400  |
| H  | 3.88672000  | 0.52829800  | 4.00974200  |
| N  | -1.22746100 | 0.77281900  | 1.18147700  |
| C  | -1.44524400 | 1.01106800  | 2.49791500  |
| C  | -3.56940900 | 1.18856500  | 0.70362600  |
| C  | -2.77213500 | 1.26517900  | 2.98582600  |
| C  | -3.83317100 | 1.32275900  | 2.03577200  |
| H  | -4.36736700 | 1.27976400  | -0.02455200 |
| H  | -4.84206800 | 1.50489800  | 2.39130300  |
| C  | -0.37113100 | 1.03507100  | 3.44855400  |

|   |             |             |             |
|---|-------------|-------------|-------------|
| C | -2.99393900 | 1.45212900  | 4.35349800  |
| C | -1.94434100 | 1.42975300  | 5.26653700  |
| H | -2.13341000 | 1.57377900  | 6.32419200  |
| C | -0.65287800 | 1.24208000  | 4.81294300  |
| H | 0.17627000  | 1.25660500  | 5.50895300  |
| H | -4.01289400 | 1.62152300  | 4.69004000  |
| O | 1.92526100  | 1.15043400  | 4.03288900  |
| C | -2.25506400 | 0.93506700  | 0.26237500  |
| C | -1.87004300 | 0.84695300  | -1.10070300 |
| C | -0.02280700 | 0.65236800  | -2.61365400 |
| C | 0.78779900  | -0.38381600 | -3.09550900 |
| C | -0.20278000 | 1.79012300  | -3.41452000 |
| C | 1.36657400  | -0.30050900 | -4.35257700 |
| C | 0.39445900  | 1.87465200  | -4.66530200 |
| C | 1.17590500  | 0.82809900  | -5.14606600 |
| H | 1.96840000  | -1.12799700 | -4.71718500 |
| H | 0.25253000  | 2.76746200  | -5.26651300 |
| H | 1.63490500  | 0.89414900  | -6.12676300 |
| H | 0.92126700  | -1.26472300 | -2.47674300 |
| H | -0.79515000 | 2.61650100  | -3.03427800 |
| H | 3.42704200  | 1.23445300  | 1.22203800  |
| H | 3.59891200  | 2.17978600  | 3.42145700  |
| N | -0.58738200 | 0.53875600  | -1.33511200 |
| C | -2.88096500 | 1.03317000  | -2.19146800 |
| H | -3.10264500 | 2.08833900  | -2.38403000 |
| H | -2.53159100 | 0.59717600  | -3.12837200 |
| H | -3.82747400 | 0.55497900  | -1.92782900 |
| C | -0.10991500 | -2.06074400 | 0.97763700  |
| H | 0.60930800  | -2.88543600 | 1.08522000  |
| H | -0.34133300 | -1.73661200 | 2.00027100  |
| C | -1.36141300 | -2.54351100 | 0.25513700  |
| H | -2.10164000 | -1.72925300 | 0.26481000  |
| C | -2.00232600 | -3.73709800 | 0.98892100  |
| H | -1.29165600 | -4.57512700 | 0.98060100  |
| H | -2.13027500 | -3.46190500 | 2.04305000  |
| C | -3.33314300 | -4.17590100 | 0.40346600  |
| H | -3.77634800 | -4.99492200 | 0.97544700  |
| H | -4.05287900 | -3.35020400 | 0.40089700  |
| H | -3.22456300 | -4.51485600 | -0.63082200 |
| C | -1.09452400 | -2.87299100 | -1.19756100 |
| C | -1.93322000 | -2.39360100 | -2.20909800 |
| C | -0.02342800 | -3.67555300 | -1.58444700 |
| C | -1.69813500 | -2.66661600 | -3.54517600 |
| H | -2.78714300 | -1.77970600 | -1.93159700 |
| C | 0.23264900  | -3.96859900 | -2.92362200 |
| H | 0.64356300  | -4.08188700 | -0.82782400 |
| C | -0.60168700 | -3.44959900 | -3.91328000 |
| H | -2.33791300 | -2.27115400 | -4.32718700 |
| H | 1.08271800  | -4.58927700 | -3.18109400 |
| O | -0.42648700 | -3.63771200 | -5.25108700 |
| C | 0.67770000  | -4.41779200 | -5.65015900 |

|   |            |             |             |
|---|------------|-------------|-------------|
| H | 0.61522000 | -5.44195900 | -5.26174900 |
| H | 0.65343900 | -4.44698200 | -6.73837400 |
| H | 1.62738500 | -3.97504600 | -5.32366900 |
| H | 1.61328700 | -0.73525500 | -0.30248600 |
| H | 1.04408400 | -1.40686100 | 0.10783800  |

Imaginary Frequency: -947.63

**V' (Quartet)**

0 4

|    |             |             |             |
|----|-------------|-------------|-------------|
| Fe | -0.13658500 | 0.34132200  | 0.03906300  |
| N  | -0.33808100 | -0.27170200 | 1.85966200  |
| C  | 0.73769100  | -0.78991300 | 2.70524100  |
| C  | -1.45359000 | -0.32209100 | 2.53855000  |
| C  | -0.00157900 | -1.37007400 | 3.90521900  |
| H  | 1.32289200  | -1.53066600 | 2.15470500  |
| H  | -0.06145600 | -2.46332100 | 3.88694300  |
| N  | -2.08907900 | 0.71659700  | -0.12468200 |
| C  | -3.05392900 | 0.61053800  | 0.82722600  |
| C  | -3.74837700 | 1.49504200  | -1.72209100 |
| C  | -4.41306800 | 0.97097000  | 0.54230400  |
| C  | -4.72276300 | 1.42832700  | -0.77124600 |
| H  | -3.98432300 | 1.81799100  | -2.72950500 |
| H  | -5.74741400 | 1.70477700  | -0.99852900 |
| C  | -2.76409200 | 0.10993800  | 2.13949000  |
| C  | -5.39905600 | 0.85866500  | 1.52809000  |
| C  | -5.09601400 | 0.38388800  | 2.79841400  |
| H  | -5.86921900 | 0.29972200  | 3.55345700  |
| C  | -3.79844600 | 0.00856900  | 3.09045400  |
| H  | -3.55102300 | -0.37611500 | 4.07171100  |
| H  | -6.41554900 | 1.14529600  | 1.27373800  |
| O  | -1.34304500 | -0.85575000 | 3.77618000  |
| C  | -2.42385400 | 1.12794200  | -1.40453700 |
| C  | -1.36672800 | 1.09972200  | -2.34757000 |
| C  | 0.90130200  | 0.41349600  | -2.71901300 |
| C  | 0.72804200  | -0.45418000 | -3.80436700 |
| C  | 2.18337800  | 0.90131200  | -2.44021900 |
| C  | 1.81139400  | -0.81974900 | -4.59273800 |
| C  | 3.25758000  | 0.54497800  | -3.24211200 |
| C  | 3.08018700  | -0.31857300 | -4.32139900 |
| H  | 1.66057600  | -1.51361900 | -5.41465400 |
| H  | 4.24459500  | 0.93629400  | -3.01674000 |
| H  | 3.92613000  | -0.60547400 | -4.93718100 |
| H  | -0.25485300 | -0.87371300 | -3.99433800 |
| H  | 2.31692100  | 1.54508000  | -1.57830700 |
| H  | 1.41916100  | 0.02609300  | 2.96679900  |
| H  | 0.38575000  | -1.05419500 | 4.87447500  |
| N  | -0.17349000 | 0.72854800  | -1.86126600 |
| C  | -1.59963400 | 1.47912600  | -3.77598000 |
| H  | -0.66333600 | 1.71785800  | -4.27999700 |
| H  | -2.07941500 | 0.67166300  | -4.34288300 |
| H  | -2.25182100 | 2.35255700  | -3.84468300 |



|   |             |             |             |
|---|-------------|-------------|-------------|
| C | 1.88961100  | -2.94673300 | -1.01029100 |
| H | 2.22579300  | -3.85726800 | -1.51741500 |
| H | 2.51032600  | -2.82594800 | -0.11770500 |
| C | 0.41551400  | -3.02049700 | -0.63192000 |
| H | 0.19008800  | -2.11578000 | -0.04377700 |
| C | 0.13272000  | -4.21552100 | 0.29027100  |
| H | 0.29497500  | -5.14692100 | -0.26948800 |
| H | 0.88444500  | -4.21568900 | 1.09160700  |
| C | -1.26019600 | -4.20476500 | 0.89550900  |
| H | -1.40472800 | -5.03019100 | 1.59697700  |
| H | -1.44805600 | -3.27107800 | 1.43949300  |
| H | -2.03389500 | -4.28632300 | 0.12729300  |
| C | -0.50282600 | -2.99034300 | -1.83433400 |
| C | -1.69578400 | -2.25899700 | -1.79488700 |
| C | -0.21008000 | -3.67106400 | -3.01411100 |
| C | -2.53817900 | -2.17314600 | -2.89040200 |
| H | -1.95826000 | -1.72498000 | -0.88422600 |
| C | -1.04545500 | -3.60678400 | -4.12805900 |
| H | 0.70560800  | -4.25123400 | -3.08798800 |
| C | -2.21026100 | -2.84041300 | -4.07340400 |
| H | -3.45215300 | -1.58858600 | -2.85494700 |
| H | -0.77226600 | -4.14056000 | -5.03063000 |
| O | -3.07591900 | -2.66984900 | -5.11259800 |
| C | -2.75705400 | -3.31648500 | -6.32519100 |
| H | -2.72276700 | -4.40654600 | -6.20832000 |
| H | -3.54883800 | -3.05773600 | -7.02631700 |
| H | -1.79477000 | -2.97401700 | -6.72642500 |
| H | 1.40706000  | 0.17437100  | 0.16977800  |
| H | 2.08964500  | -2.09752500 | -1.66911200 |

### III' (Sextet)

0 6

|    |             |             |             |
|----|-------------|-------------|-------------|
| Fe | 0.47640100  | 0.33867000  | -0.15553200 |
| N  | 0.05001500  | 0.72585500  | 1.87983100  |
| C  | 1.07978400  | 1.06465100  | 2.85992200  |
| C  | -0.97627400 | 0.26566700  | 2.52906000  |
| C  | 0.57087200  | 0.43204700  | 4.14908500  |
| H  | 2.05006400  | 0.67152000  | 2.54446700  |
| H  | 1.06103000  | -0.52063600 | 4.37767300  |
| N  | -1.68712000 | 0.24989000  | -0.33620800 |
| C  | -2.60318900 | -0.05098200 | 0.61582500  |
| C  | -3.44443100 | 0.21316200  | -2.01423300 |
| C  | -3.96995700 | -0.33997500 | 0.27250400  |
| C  | -4.35996300 | -0.17397000 | -1.08407600 |
| H  | -3.73947900 | 0.34486800  | -3.04874800 |
| H  | -5.39297100 | -0.36640200 | -1.35829400 |
| C  | -2.26403900 | -0.11901000 | 2.01081300  |
| C  | -4.88229000 | -0.76933000 | 1.24004600  |
| C  | -4.50781400 | -0.90302100 | 2.56980400  |
| H  | -5.21752300 | -1.24631400 | 3.31370500  |
| C  | -3.21887200 | -0.56315700 | 2.94154200  |

|   |             |             |             |
|---|-------------|-------------|-------------|
| H | -2.92270900 | -0.62586600 | 3.98090100  |
| H | -5.89624400 | -0.99840400 | 0.92385400  |
| O | -0.81633300 | 0.16091700  | 3.87357700  |
| C | -2.08863100 | 0.38171900  | -1.64754100 |
| C | -1.08289100 | 0.60662800  | -2.63442800 |
| C | 1.28002200  | 0.54093000  | -3.06146200 |
| C | 1.33349600  | -0.31388600 | -4.17679500 |
| C | 2.44327300  | 1.25061900  | -2.71686600 |
| C | 2.49590600  | -0.42776100 | -4.92599600 |
| C | 3.59808200  | 1.13701900  | -3.47470300 |
| C | 3.63307700  | 0.30102500  | -4.58799500 |
| H | 2.51721700  | -1.10293100 | -5.77597000 |
| H | 4.48131700  | 1.70029100  | -3.19048000 |
| H | 4.53920100  | 0.20788100  | -5.17641700 |
| H | 0.46591500  | -0.91740700 | -4.42391700 |
| H | 2.42280500  | 1.88926900  | -1.83797900 |
| H | 1.17542300  | 2.15621500  | 2.93513100  |
| H | 0.62083000  | 1.07682300  | 5.02690100  |
| N | 0.17960400  | 0.60998400  | -2.21203700 |
| C | -1.47533400 | 0.86578800  | -4.05991300 |
| H | -0.64782400 | 1.30391300  | -4.61797000 |
| H | -1.77479300 | -0.04714900 | -4.58947200 |
| H | -2.32066100 | 1.55576900  | -4.11466000 |
| C | 2.15423400  | -0.85612900 | 0.10802800  |
| H | 2.56941500  | -1.07539700 | -0.88688300 |
| H | 2.97162600  | -0.40679500 | 0.68791500  |
| C | 1.65324200  | -2.14327800 | 0.77097200  |
| H | 1.47997900  | -1.93795300 | 1.84143500  |
| C | 2.66544300  | -3.29787900 | 0.69037800  |
| H | 2.83474700  | -3.53232000 | -0.36929100 |
| H | 3.62826300  | -2.93398800 | 1.07050900  |
| C | 2.24552900  | -4.54977300 | 1.44137200  |
| H | 3.00582200  | -5.33312600 | 1.38498200  |
| H | 2.07334000  | -4.33662500 | 2.50218500  |
| H | 1.31519000  | -4.96340900 | 1.04107400  |
| C | 0.30545600  | -2.53828300 | 0.19245900  |
| C | -0.77445600 | -2.90081000 | 1.00460300  |
| C | 0.09330100  | -2.52731300 | -1.18953400 |
| C | -2.01575000 | -3.20923800 | 0.47206400  |
| H | -0.64227900 | -2.91652000 | 2.08538500  |
| C | -1.14425100 | -2.83492900 | -1.74645100 |
| H | 0.91096300  | -2.25307300 | -1.85186700 |
| C | -2.21278000 | -3.16164900 | -0.90966700 |
| H | -2.85942200 | -3.45509700 | 1.10861200  |
| H | -1.26934200 | -2.79680100 | -2.82285700 |
| O | -3.47548700 | -3.43882300 | -1.34196500 |
| C | -3.70098500 | -3.38206400 | -2.73257100 |
| H | -3.10101000 | -4.12550900 | -3.27220300 |
| H | -4.75792900 | -3.60110000 | -2.87955600 |
| H | -3.48032600 | -2.38510800 | -3.13658800 |
| H | 0.74938000  | 2.81406400  | 0.24028800  |

|   |            |            |             |
|---|------------|------------|-------------|
| H | 0.69614300 | 2.79219200 | -0.50827800 |
|---|------------|------------|-------------|

**IV' (Sextet)**

0 6

|    |             |             |             |
|----|-------------|-------------|-------------|
| Fe | 0.26472600  | -0.30987300 | -0.71797300 |
| N  | -0.46476300 | -0.05706100 | 1.20342800  |
| C  | 0.38636700  | -0.02627600 | 2.39021500  |
| C  | -1.66546400 | -0.40055900 | 1.57496700  |
| C  | -0.54082600 | -0.45675400 | 3.52693300  |
| H  | 1.23307100  | -0.71030000 | 2.25771000  |
| H  | -0.26986800 | -1.42033000 | 3.96737300  |
| N  | -1.76159700 | 0.06726800  | -1.31035200 |
| C  | -2.88328400 | -0.25373000 | -0.63305100 |
| C  | -3.08219400 | 0.58988700  | -3.26860500 |
| C  | -4.16463000 | -0.27627800 | -1.28600300 |
| C  | -4.21280700 | 0.14286500  | -2.64610100 |
| H  | -3.12760900 | 0.95035400  | -4.28975900 |
| H  | -5.16751000 | 0.13203200  | -3.16299800 |
| C  | -2.85054700 | -0.55920800 | 0.76903000  |
| C  | -5.30821000 | -0.67740500 | -0.59029400 |
| C  | -5.24227700 | -1.03060100 | 0.75381100  |
| H  | -6.13390300 | -1.34695400 | 1.28395800  |
| C  | -4.03178200 | -0.95671400 | 1.42021600  |
| H  | -3.97591500 | -1.20523600 | 2.47243000  |
| H  | -6.25650300 | -0.69543300 | -1.12068200 |
| O  | -1.82667000 | -0.60439400 | 2.90210800  |
| C  | -1.84405400 | 0.56052100  | -2.59208400 |
| C  | -0.62838800 | 1.04291200  | -3.18060500 |
| C  | 1.75573500  | 1.20273500  | -2.90126700 |
| C  | 2.24226600  | 0.77206800  | -4.14609200 |
| C  | 2.65198200  | 1.81094500  | -2.00849800 |
| C  | 3.57452700  | 0.96347700  | -4.48474500 |
| C  | 3.97911400  | 2.00610500  | -2.35700000 |
| C  | 4.44994100  | 1.58528000  | -3.59849700 |
| H  | 3.93650600  | 0.60924600  | -5.44497500 |
| H  | 4.65383500  | 2.48141900  | -1.65173400 |
| H  | 5.49083500  | 1.72816200  | -3.86762700 |
| H  | 1.57908200  | 0.24354700  | -4.82297300 |
| H  | 2.27614300  | 2.12290200  | -1.03822500 |
| H  | 0.79981400  | 0.97818800  | 2.53160300  |
| H  | -0.63924500 | 0.28268200  | 4.32439800  |
| N  | 0.46722000  | 0.93179400  | -2.44424500 |
| C  | -0.66446400 | 1.71272400  | -4.52209500 |
| H  | 0.23528600  | 2.30553700  | -4.68548000 |
| H  | -0.73566700 | 0.99433700  | -5.34641300 |
| H  | -1.52689100 | 2.37780100  | -4.60346200 |
| C  | 1.78593800  | -1.65162500 | -1.06927500 |
| H  | 1.53948700  | -2.07895200 | -2.05580100 |
| H  | 2.76654400  | -1.17474000 | -1.20244000 |
| C  | 1.86381800  | -2.76389600 | -0.02061000 |
| H  | 2.37990700  | -2.36286900 | 0.86834800  |

|   |             |             |             |
|---|-------------|-------------|-------------|
| C | 2.68910100  | -3.97022600 | -0.50531800 |
| H | 2.18082400  | -4.40274600 | -1.37801700 |
| H | 3.64996700  | -3.59403200 | -0.87712400 |
| C | 2.92032000  | -5.04131200 | 0.54652000  |
| H | 3.53904300  | -5.85754200 | 0.16462800  |
| H | 3.42901100  | -4.63035700 | 1.42547200  |
| H | 1.97777300  | -5.47635000 | 0.89180700  |
| C | 0.48349800  | -3.19019300 | 0.43911100  |
| C | 0.18704800  | -3.40530600 | 1.78879800  |
| C | -0.55753100 | -3.35956300 | -0.47595200 |
| C | -1.08779900 | -3.75211500 | 2.21115100  |
| H | 0.98066500  | -3.29429000 | 2.52645000  |
| C | -1.84113600 | -3.72257300 | -0.07764900 |
| H | -0.36637800 | -3.19801500 | -1.53392400 |
| C | -2.11387700 | -3.91185900 | 1.27724500  |
| H | -1.31823600 | -3.90161800 | 3.26110000  |
| H | -2.62207400 | -3.82610800 | -0.82195600 |
| O | -3.33651800 | -4.23428700 | 1.78126400  |
| C | -4.36121800 | -4.50983100 | 0.84737700  |
| H | -4.09318800 | -5.35155400 | 0.19707800  |
| H | -5.24095300 | -4.77371700 | 1.43287500  |
| H | -4.59312300 | -3.63520900 | 0.22842100  |
| H | 3.05251500  | 0.24636000  | 0.60861300  |
| H | 3.48984500  | 0.50903900  | 1.15661300  |

#### TS<sub>4</sub> (Sextet)

0 6

|    |             |             |             |
|----|-------------|-------------|-------------|
| Fe | 0.49031200  | 0.02404800  | 0.21291600  |
| N  | 1.47394700  | 0.72813800  | 1.91733900  |
| C  | 2.91667300  | 0.63054300  | 2.12503500  |
| C  | 0.91629900  | 0.92169900  | 3.07464500  |
| C  | 3.10555100  | 1.06896400  | 3.57316300  |
| H  | 3.23667900  | -0.40309200 | 1.94408000  |
| H  | 3.72284500  | 0.40114200  | 4.17524100  |
| N  | -1.26147900 | 0.90333300  | 1.09842800  |
| C  | -1.53098200 | 1.03291500  | 2.41425000  |
| C  | -3.59076900 | 1.29769400  | 0.57035800  |
| C  | -2.87761700 | 1.23461600  | 2.87993700  |
| C  | -3.90041400 | 1.35798200  | 1.89887800  |
| H  | -4.36588400 | 1.42994800  | -0.17503900 |
| H  | -4.92196000 | 1.52218400  | 2.22723800  |
| C  | -0.48845100 | 1.00141600  | 3.40443100  |
| C  | -3.15289400 | 1.32341900  | 4.24768600  |
| C  | -2.13486600 | 1.24899200  | 5.18913700  |
| H  | -2.35770500 | 1.31622100  | 6.24782800  |
| C  | -0.82454100 | 1.10847100  | 4.76492200  |
| H  | -0.02234700 | 1.08227200  | 5.49121900  |
| H  | -4.18485500 | 1.45968000  | 4.55910300  |
| O  | 1.77137100  | 1.05169500  | 4.11752300  |
| C  | -2.25855300 | 1.06277900  | 0.16794600  |
| C  | -1.86674200 | 0.96613300  | -1.20709400 |

|   |             |             |             |
|---|-------------|-------------|-------------|
| C | -0.04966900 | 0.69493400  | -2.74555800 |
| C | 0.75615500  | -0.36534400 | -3.18150200 |
| C | -0.21947300 | 1.80343700  | -3.58898200 |
| C | 1.33764600  | -0.33337000 | -4.44025800 |
| C | 0.37759300  | 1.83277300  | -4.84174000 |
| C | 1.15231400  | 0.76205900  | -5.27920600 |
| H | 1.94124000  | -1.17496900 | -4.76696300 |
| H | 0.24119300  | 2.70132000  | -5.47854700 |
| H | 1.61239000  | 0.78581800  | -6.26130000 |
| H | 0.89633800  | -1.21793400 | -2.52524600 |
| H | -0.80323400 | 2.64999800  | -3.24131800 |
| H | 3.45321500  | 1.25936100  | 1.41037900  |
| H | 3.49155200  | 2.08870400  | 3.66880500  |
| N | -0.59985500 | 0.64421400  | -1.45674200 |
| C | -2.88714300 | 1.14513700  | -2.29095300 |
| H | -3.12623200 | 2.19809700  | -2.47474800 |
| H | -2.53675500 | 0.71962700  | -3.23138000 |
| H | -3.82360100 | 0.64990200  | -2.02507100 |
| C | 0.20298900  | -2.13728700 | 1.03925100  |
| H | 0.86435600  | -3.00355200 | 1.17726100  |
| H | 0.02648600  | -1.73451800 | 2.04544100  |
| C | -1.11114200 | -2.55311700 | 0.38195200  |
| H | -1.81295500 | -1.70661000 | 0.45474400  |
| C | -1.76869900 | -3.73122600 | 1.12674100  |
| H | -1.10928100 | -4.60602000 | 1.04277200  |
| H | -1.80302400 | -3.48131400 | 2.19435000  |
| C | -3.16217900 | -4.07591600 | 0.63116600  |
| H | -3.60943200 | -4.88560100 | 1.21325500  |
| H | -3.83039500 | -3.21075300 | 0.70499100  |
| H | -3.15107600 | -4.38917600 | -0.41672400 |
| C | -0.95322900 | -2.85696000 | -1.09358700 |
| C | -1.87837000 | -2.38054600 | -2.02938100 |
| C | 0.09489000  | -3.63987600 | -1.57334800 |
| C | -1.75392800 | -2.64796300 | -3.38139100 |
| H | -2.71157300 | -1.77457200 | -1.67843200 |
| C | 0.23964000  | -3.92642900 | -2.92993700 |
| H | 0.83331800  | -4.03084600 | -0.87799100 |
| C | -0.68465700 | -3.41948900 | -3.84301700 |
| H | -2.46185100 | -2.25868100 | -4.10563800 |
| H | 1.07610300  | -4.53027200 | -3.26124600 |
| O | -0.62418200 | -3.60579600 | -5.19063500 |
| C | 0.44182200  | -4.38544000 | -5.68430800 |
| H | 0.41644300  | -5.40772800 | -5.28700400 |
| H | 0.31937500  | -4.41938900 | -6.76572300 |
| H | 1.41602400  | -3.93983600 | -5.44718200 |
| H | 1.92785400  | -0.94169700 | -0.37652200 |
| H | 1.26962600  | -1.53065600 | 0.16597500  |

Imaginary Frequency:-1575.54

**V' (Sextet)**

0 6

|    |             |             |             |
|----|-------------|-------------|-------------|
| Fe | 0.02689900  | 0.84509300  | 0.18527100  |
| N  | -0.44004800 | -0.44338200 | 1.77635300  |
| C  | 0.58923700  | -1.09884800 | 2.57947000  |
| C  | -1.55175100 | -0.46306500 | 2.44719900  |
| C  | -0.17041700 | -1.62999000 | 3.79494200  |
| H  | 1.07243000  | -1.89346800 | 2.00091600  |
| H  | -0.24451900 | -2.72099700 | 3.81984000  |
| N  | -2.10783300 | 0.83730600  | -0.11600300 |
| C  | -3.08994100 | 0.67534900  | 0.79611000  |
| C  | -3.73348800 | 1.53859900  | -1.76407400 |
| C  | -4.44703700 | 1.04086600  | 0.49381900  |
| C  | -4.72495100 | 1.50021600  | -0.82431800 |
| H  | -3.95959200 | 1.82703300  | -2.78369500 |
| H  | -5.74294000 | 1.78066600  | -1.07610400 |
| C  | -2.83207200 | 0.09706500  | 2.08408600  |
| C  | -5.44597200 | 0.92394100  | 1.46435500  |
| C  | -5.16232000 | 0.42030100  | 2.72769800  |
| H  | -5.94293800 | 0.33764100  | 3.47506900  |
| C  | -3.87703800 | -0.00398900 | 3.01819000  |
| H  | -3.65579700 | -0.43884100 | 3.98469700  |
| H  | -6.45607400 | 1.22891100  | 1.20548000  |
| O  | -1.50338100 | -1.10283000 | 3.63920600  |
| C  | -2.41452100 | 1.18709100  | -1.40995800 |
| C  | -1.34979600 | 1.08859600  | -2.36897400 |
| C  | 0.92433600  | 0.37471200  | -2.71018900 |
| C  | 0.78370600  | -0.48354600 | -3.81171200 |
| C  | 2.21313400  | 0.78622100  | -2.33455200 |
| C  | 1.89986200  | -0.89606300 | -4.52582100 |
| C  | 3.32094500  | 0.37490600  | -3.06126000 |
| C  | 3.17283500  | -0.46553600 | -4.16259000 |
| H  | 1.77151900  | -1.57656000 | -5.36259400 |
| H  | 4.30895200  | 0.71036100  | -2.76240000 |
| H  | 4.04230800  | -0.79164200 | -4.72333300 |
| H  | -0.19993500 | -0.86438700 | -4.06737400 |
| H  | 2.32387300  | 1.43251000  | -1.46767200 |
| H  | 1.36452700  | -0.36801400 | 2.83483600  |
| H  | 0.21780700  | -1.28095300 | 4.75353600  |
| N  | -0.15663100 | 0.74210200  | -1.90273400 |
| C  | -1.62099200 | 1.37524400  | -3.81287300 |
| H  | -0.69542900 | 1.55168300  | -4.36005700 |
| H  | -2.14171600 | 0.54226700  | -4.30132600 |
| H  | -2.25262200 | 2.25920900  | -3.92091700 |
| C  | 2.03528200  | -2.94579100 | -1.19888200 |
| H  | 2.30547100  | -3.89534500 | -1.67308600 |
| H  | 2.71556400  | -2.80770600 | -0.35256400 |
| C  | 0.58572300  | -2.94436600 | -0.72804300 |
| H  | 0.41569600  | -2.00992900 | -0.17021300 |
| C  | 0.32934900  | -4.10629400 | 0.24527700  |
| H  | 0.48216900  | -5.05378500 | -0.28986000 |
| H  | 1.10421600  | -4.08192100 | 1.02455200  |
| C  | -1.04741200 | -4.08994300 | 0.88642100  |

|   |             |             |             |
|---|-------------|-------------|-------------|
| H | -1.15366600 | -4.87760900 | 1.63681700  |
| H | -1.24606700 | -3.13135000 | 1.37843700  |
| H | -1.83773600 | -4.23244500 | 0.14486100  |
| C | -0.41165600 | -2.92896700 | -1.86421300 |
| C | -1.57474500 | -2.15913100 | -1.75381200 |
| C | -0.22909400 | -3.65342600 | -3.03930300 |
| C | -2.49955900 | -2.08395600 | -2.78106200 |
| H | -1.73646900 | -1.58135400 | -0.84580400 |
| C | -1.14596200 | -3.59399600 | -4.08813100 |
| H | 0.66219700  | -4.26239800 | -3.16494000 |
| C | -2.28296000 | -2.79416900 | -3.96510900 |
| H | -3.39331500 | -1.47357500 | -2.69269000 |
| H | -0.95963500 | -4.16065700 | -4.99273100 |
| O | -3.22458600 | -2.62916100 | -4.93735600 |
| C | -3.03188600 | -3.33438800 | -6.14413900 |
| H | -3.01760900 | -4.41911200 | -5.98278000 |
| H | -3.87506800 | -3.07972800 | -6.78414800 |
| H | -2.10001500 | -3.03928500 | -6.64258400 |
| H | 1.28057300  | 1.64725300  | 0.87078600  |
| H | 2.22865500  | -2.14666900 | -1.91917700 |

### TS<sub>5a</sub>

0 2

|    |             |             |             |
|----|-------------|-------------|-------------|
| Fe | 0.44903600  | -0.50129700 | -0.07368500 |
| N  | 0.63778100  | -0.59048200 | 1.86755600  |
| C  | 1.84868300  | -0.78323100 | 2.66921200  |
| C  | -0.30615900 | -0.20083100 | 2.68921500  |
| C  | 1.53790100  | -0.03890400 | 3.95560200  |
| H  | 2.00711600  | -1.85739300 | 2.82612400  |
| H  | 1.85640000  | -0.54030500 | 4.87013800  |
| N  | -1.46065600 | -0.80656400 | 0.11263200  |
| C  | -2.25482400 | -0.45702000 | 1.15601800  |
| C  | -3.42801900 | -1.48289800 | -1.14397800 |
| C  | -3.68530300 | -0.49707700 | 1.04396400  |
| C  | -4.24413100 | -1.02035700 | -0.16006700 |
| H  | -3.84555500 | -1.90599100 | -2.05031900 |
| H  | -5.32402100 | -1.06095300 | -0.26004200 |
| C  | -1.69776000 | -0.04591900 | 2.40978000  |
| C  | -4.48037200 | -0.03804900 | 2.09589000  |
| C  | -3.91671100 | 0.43393700  | 3.27757400  |
| H  | -4.55121300 | 0.79205500  | 4.08065200  |
| C  | -2.54519500 | 0.41143100  | 3.43750900  |
| H  | -2.09420100 | 0.72338600  | 4.37122500  |
| H  | -5.55956700 | -0.06347100 | 1.97394500  |
| O  | 0.09734200  | 0.02963300  | 3.96399800  |
| C  | -2.02119100 | -1.38439700 | -1.01353500 |
| C  | -1.08866300 | -1.81701700 | -1.97040100 |
| C  | 1.21310800  | -1.96527100 | -2.56160800 |
| C  | 2.21527100  | -2.86253000 | -2.18475400 |
| C  | 1.24384500  | -1.41609900 | -3.84868600 |
| C  | 3.20404800  | -3.23113500 | -3.08909000 |

|   |             |             |             |
|---|-------------|-------------|-------------|
| C | 2.23947100  | -1.77762900 | -4.74466100 |
| C | 3.21779600  | -2.69590700 | -4.37342600 |
| H | 3.96837700  | -3.94127800 | -2.78837600 |
| H | 2.25931400  | -1.33095400 | -5.73427300 |
| H | 3.99455500  | -2.97968800 | -5.07648700 |
| H | 2.19178800  | -3.26775000 | -1.17790300 |
| H | 0.49025600  | -0.68490900 | -4.12699700 |
| H | 2.72281800  | -0.39312000 | 2.15320300  |
| H | 1.93351400  | 0.98461400  | 3.94932000  |
| N | 0.20749200  | -1.62430900 | -1.62854000 |
| C | -1.51536700 | -2.50676800 | -3.22888800 |
| H | -2.44630100 | -3.05436100 | -3.07460900 |
| H | -1.68187800 | -1.81509100 | -4.06241400 |
| H | -0.76084700 | -3.22211800 | -3.56041300 |
| C | 0.36196200  | 1.35393700  | -0.72583100 |
| H | 1.99144000  | -0.46959600 | -0.19677200 |
| C | 1.76605200  | 1.06264100  | -0.63744800 |
| H | -0.12925800 | 1.37409100  | -1.69663600 |
| C | 2.47901300  | 1.76651900  | 0.51909600  |
| H | -0.10284200 | 1.98003700  | 0.03563000  |
| H | 2.46956600  | 2.84285700  | 0.29449600  |
| H | 1.86509100  | 1.65404400  | 1.42102900  |
| C | 3.92170900  | 1.35413800  | 0.82271900  |
| H | 4.02305400  | 0.26554200  | 0.76495100  |
| H | 4.57843400  | 1.74355700  | 0.03345600  |
| C | 4.35033200  | 1.86533800  | 2.15956300  |
| C | 4.91452400  | 1.19004500  | 3.17029100  |
| H | 4.14208600  | 2.92353300  | 2.33079300  |
| C | 5.29285300  | -0.25881800 | 3.12448600  |
| C | 5.22057700  | 1.86666000  | 4.47161500  |
| H | 6.28750700  | 1.80304300  | 4.71526400  |
| H | 4.93835100  | 2.92102300  | 4.46261800  |
| H | 4.69213300  | 1.38237800  | 5.30283200  |
| H | 6.36571800  | -0.38160700 | 3.31172900  |
| H | 4.78508800  | -0.82397500 | 3.91677800  |
| H | 5.07095400  | -0.74099700 | 2.17206500  |
| C | 2.56822800  | 1.01742900  | -1.90909600 |
| C | 3.66507600  | 0.17448500  | -2.07442800 |
| C | 2.26085700  | 1.91531900  | -2.93847000 |
| C | 4.42778200  | 0.22869600  | -3.23415100 |
| H | 3.89780600  | -0.55978000 | -1.31029800 |
| C | 3.02239600  | 1.94936200  | -4.10439300 |
| H | 1.41938100  | 2.58601900  | -2.81010200 |
| C | 4.12827300  | 1.10180300  | -4.27258500 |
| H | 5.26613900  | -0.45243100 | -3.35525800 |
| O | 2.76750200  | 2.78081800  | -5.15776400 |
| C | 1.65803400  | 3.64470500  | -5.04874000 |
| H | 1.76766600  | 4.34402600  | -4.21101100 |
| H | 1.61712400  | 4.20714400  | -5.98031300 |
| H | 0.72107900  | 3.08832000  | -4.92195300 |
| C | 4.91179100  | 1.13396700  | -5.54419200 |



|   |            |            |             |
|---|------------|------------|-------------|
| H | 4.27511300 | 0.92284700 | -6.40961200 |
| H | 5.34822900 | 2.12082100 | -5.72656600 |
| H | 5.71960800 | 0.39989600 | -5.52634500 |

Imaginary Frequency:-602.46

### VIIa

0 2

|    |             |             |             |
|----|-------------|-------------|-------------|
| Fe | 0.02017700  | -1.39827200 | 0.04991400  |
| N  | 0.62394000  | -2.58417700 | 1.47962000  |
| C  | 1.88150000  | -3.34602400 | 1.53482500  |
| C  | -0.09262500 | -2.95526600 | 2.51448300  |
| C  | 1.89489700  | -3.90523400 | 2.94367600  |
| H  | 1.86322500  | -4.12887200 | 0.76759900  |
| H  | 2.21095100  | -4.94570400 | 3.02031600  |
| N  | -1.82548800 | -1.24535300 | 0.88191500  |
| C  | -2.26958700 | -1.76447200 | 2.05745900  |
| C  | -3.99587500 | -0.20190700 | 0.53985100  |
| C  | -3.60205700 | -1.50701400 | 2.52871200  |
| C  | -4.45181700 | -0.70239600 | 1.72294900  |
| H  | -4.63533700 | 0.41968300  | -0.07492000 |
| H  | -5.46010500 | -0.49696200 | 2.06821800  |
| C  | -1.43063000 | -2.59022000 | 2.87591700  |
| C  | -4.04678100 | -2.03496900 | 3.74657900  |
| C  | -3.21433300 | -2.82372500 | 4.52845300  |
| H  | -3.56377100 | -3.22740400 | 5.47198200  |
| C  | -1.93030000 | -3.09393900 | 4.09409900  |
| H  | -1.27476300 | -3.71056800 | 4.69470800  |
| H  | -5.06077400 | -1.81130400 | 4.06502300  |
| O  | 0.52120000  | -3.82437500 | 3.35619800  |
| C  | -2.67749100 | -0.47283800 | 0.12169500  |
| C  | -2.13601500 | 0.04861300  | -1.08868200 |
| C  | -0.23875000 | 0.35124300  | -2.46329000 |
| C  | 0.26919400  | -0.43779400 | -3.49844700 |
| C  | -0.07980000 | 1.73966300  | -2.53006400 |
| C  | 0.92871100  | 0.14981400  | -4.57123800 |
| C  | 0.58121400  | 2.32278400  | -3.60288800 |
| C  | 1.09283900  | 1.53107400  | -4.62737800 |
| H  | 1.31653600  | -0.47712700 | -5.36824400 |
| H  | 0.70089900  | 3.40142400  | -3.63469900 |
| H  | 1.61198000  | 1.98706100  | -5.46451700 |
| H  | 0.14587600  | -1.51462100 | -3.44469800 |
| H  | -0.44787000 | 2.35305900  | -1.71224000 |
| H  | 2.74096500  | -2.70889000 | 1.32849600  |
| H  | 2.49303500  | -3.30032700 | 3.63474700  |
| N  | -0.86373900 | -0.24885700 | -1.34437000 |
| C  | -2.99323900 | 0.85189000  | -2.01905700 |
| H  | -4.00337700 | 0.44251600  | -2.07054800 |
| H  | -3.08423100 | 1.89586000  | -1.69952500 |
| H  | -2.58151000 | 0.85977600  | -3.02751900 |
| C  | 1.87761700  | -1.39185200 | -0.75682600 |
| H  | 2.86165000  | -0.67415100 | 1.03785200  |

|   |            |             |             |
|---|------------|-------------|-------------|
| C | 2.79064100 | -0.39660300 | -0.02699800 |
| H | 2.33509900 | -2.38888200 | -0.75233600 |
| C | 2.20296500 | 1.01598600  | -0.09358600 |
| H | 1.82868600 | -1.09744200 | -1.81122300 |
| H | 2.11959100 | 1.30915300  | -1.14732100 |
| H | 1.16705600 | 1.00067900  | 0.28130100  |
| C | 2.99621700 | 2.09379200  | 0.64556700  |
| H | 2.99498500 | 1.88034800  | 1.72129200  |
| H | 4.04613600 | 2.03494800  | 0.33377300  |
| C | 2.44145500 | 3.46150900  | 0.38584900  |
| C | 2.68205500 | 4.20667500  | -0.70091900 |
| H | 1.73622300 | 3.85362400  | 1.11894100  |
| C | 3.60746000 | 3.78520600  | -1.80150800 |
| C | 2.01874700 | 5.53339600  | -0.90370300 |
| H | 1.42509700 | 5.54444900  | -1.82690000 |
| H | 1.35616000 | 5.79146300  | -0.07513500 |
| H | 2.75606500 | 6.33811000  | -1.01092100 |
| H | 4.37559900 | 4.54640800  | -1.98297700 |
| H | 4.11184100 | 2.83743500  | -1.60337900 |
| H | 3.06015200 | 3.67353900  | -2.74661900 |
| C | 4.19629000 | -0.41982900 | -0.58762500 |
| C | 5.28531300 | -0.83347200 | 0.17083200  |
| C | 4.41966700 | -0.01670900 | -1.91120600 |
| C | 6.56742000 | -0.84484000 | -0.37932000 |
| H | 5.13394500 | -1.13736600 | 1.20385200  |
| C | 5.70149000 | -0.02162700 | -2.44749800 |
| H | 3.57296000 | 0.29841300  | -2.51398300 |
| C | 6.80794300 | -0.44204500 | -1.68536800 |
| H | 7.41080500 | -1.16926900 | 0.22542800  |
| O | 5.99585500 | 0.36953700  | -3.72236300 |
| C | 4.92117500 | 0.80427700  | -4.52748900 |
| H | 4.41998100 | 1.68109000  | -4.09879400 |
| H | 5.35242600 | 1.07135400  | -5.49153500 |
| H | 4.17393900 | 0.01369400  | -4.67039300 |
| C | 8.17459200 | -0.43952400 | -2.29060600 |
| H | 8.92096800 | -0.79457800 | -1.57774500 |
| H | 8.22090900 | -1.07477400 | -3.18058600 |
| H | 8.46567100 | 0.56250800  | -2.62083300 |

**TS<sub>6a</sub>**

0 2

|    |             |             |             |
|----|-------------|-------------|-------------|
| Fe | -0.00058400 | -0.80499700 | 0.60505200  |
| N  | 0.68479800  | -1.92526900 | 2.05527700  |
| C  | 2.05916500  | -1.92020900 | 2.56812000  |
| C  | 0.00149300  | -2.77081400 | 2.77320100  |
| C  | 1.96863200  | -2.72326900 | 3.85698500  |
| H  | 2.73202100  | -2.37012500 | 1.82807000  |
| H  | 2.72546800  | -3.50135800 | 3.96150300  |
| N  | -1.74337700 | -1.73050400 | 0.66012700  |
| C  | -2.19279500 | -2.67050100 | 1.54994800  |
| C  | -3.90322300 | -1.82807800 | -0.47613100 |

|   |             |             |             |
|---|-------------|-------------|-------------|
| C | -3.51938400 | -3.20672900 | 1.45837200  |
| C | -4.35944100 | -2.76264700 | 0.40054700  |
| H | -4.53287300 | -1.48323400 | -1.28694500 |
| H | -5.35819100 | -3.17803500 | 0.31436700  |
| C | -1.36937000 | -3.16675500 | 2.60775600  |
| C | -3.97787600 | -4.14843100 | 2.38994700  |
| C | -3.16991900 | -4.59262500 | 3.42257600  |
| H | -3.53717300 | -5.31588900 | 4.14153800  |
| C | -1.87842200 | -4.10562600 | 3.52149300  |
| H | -1.22529800 | -4.45001500 | 4.31273900  |
| H | -4.99274400 | -4.52053300 | 2.28180500  |
| O | 0.68140400  | -3.36377800 | 3.78073400  |
| C | -2.60435100 | -1.29715300 | -0.33865300 |
| C | -2.08413600 | -0.27986200 | -1.16963400 |
| C | -0.24641700 | 1.12652300  | -1.64488500 |
| C | 0.31159900  | 0.83683800  | -2.89352800 |
| C | -0.21060100 | 2.43754500  | -1.17034300 |
| C | 0.90097500  | 1.84503700  | -3.64896800 |
| C | 0.37699200  | 3.44201500  | -1.93021300 |
| C | 0.93468600  | 3.15163900  | -3.17092000 |
| H | 1.32729100  | 1.60942000  | -4.61992200 |
| H | 0.40396300  | 4.45757200  | -1.54707900 |
| H | 1.38832000  | 3.93919900  | -3.76387500 |
| H | 0.27766600  | -0.18517400 | -3.26195800 |
| H | -0.64529000 | 2.65605500  | -0.20150000 |
| H | 2.39412600  | -0.89481600 | 2.73100700  |
| H | 1.97911000  | -2.09659900 | 4.75493800  |
| N | -0.83423800 | 0.08978500  | -0.86705500 |
| C | -2.85881400 | 0.35286800  | -2.28108500 |
| H | -2.57466800 | -0.05052500 | -3.26006200 |
| H | -3.93184900 | 0.20740500  | -2.16577400 |
| H | -2.67254800 | 1.42838000  | -2.32393900 |
| C | 1.85795200  | -0.67792600 | -0.22339600 |
| H | 3.39364700  | 0.01803600  | 1.14518600  |
| C | 3.12202000  | 0.13309000  | 0.08603800  |
| H | 2.06720400  | -1.75094200 | -0.09362300 |
| C | 2.90807100  | 1.62337300  | -0.18377000 |
| H | 1.61858900  | -0.52636800 | -1.27955000 |
| H | 2.62726600  | 1.76163600  | -1.23671900 |
| H | 2.04156500  | 1.97851300  | 0.38877600  |
| C | 4.11501600  | 2.51016200  | 0.12088200  |
| H | 4.33071500  | 2.47741200  | 1.19649000  |
| H | 5.00166800  | 2.09204000  | -0.37070800 |
| C | 3.88060700  | 3.92355400  | -0.31762700 |
| C | 4.05661100  | 4.39490500  | -1.55851400 |
| H | 3.47299000  | 4.60669300  | 0.42784500  |
| C | 4.57624000  | 3.56428900  | -2.69187100 |
| C | 3.72484700  | 5.81102700  | -1.91208300 |
| H | 2.96909300  | 5.85561900  | -2.70683400 |
| H | 3.34363800  | 6.36887000  | -1.05425100 |
| H | 4.60139400  | 6.34370400  | -2.30005100 |

|    |             |             |             |
|----|-------------|-------------|-------------|
| H  | 5.47719200  | 4.01148100  | -3.12896700 |
| H  | 4.81453700  | 2.53855900  | -2.40353000 |
| H  | 3.83710300  | 3.51522100  | -3.50183400 |
| C  | 4.27664700  | -0.41049900 | -0.72818100 |
| C  | 5.36127600  | -1.04187600 | -0.13148500 |
| C  | 4.25927500  | -0.28394300 | -2.12320500 |
| C  | 6.40742500  | -1.53451400 | -0.91183400 |
| H  | 5.39618500  | -1.13969200 | 0.95064800  |
| C  | 5.30893900  | -0.77321900 | -2.89175500 |
| H  | 3.41371100  | 0.20735100  | -2.59497000 |
| C  | 6.41057700  | -1.41398900 | -2.29443500 |
| H  | 7.25245200  | -2.02325500 | -0.43343400 |
| O  | 5.36539400  | -0.67790700 | -4.25193500 |
| C  | 4.28515800  | -0.04171400 | -4.89968200 |
| H  | 4.17671100  | 1.00161500  | -4.57797200 |
| H  | 4.51066200  | -0.06857300 | -5.96480500 |
| H  | 3.33744800  | -0.56458700 | -4.71707500 |
| C  | 7.52473400  | -1.93021600 | -3.14629700 |
| H  | 8.29999800  | -2.39925400 | -2.53805700 |
| H  | 7.16631800  | -2.66614000 | -3.87252200 |
| H  | 7.98616900  | -1.12914500 | -3.73182100 |
| Si | -0.56379200 | 0.75973500  | 2.26848600  |
| H  | 0.93175200  | 0.32618000  | 0.84183300  |
| H  | -1.10971900 | 2.03979600  | 1.76448500  |
| H  | -1.64572700 | 0.13537600  | 3.07113200  |
| C  | 0.81914000  | 1.20403100  | 3.51751700  |
| H  | 1.72936200  | 1.55502600  | 3.02267400  |
| H  | 0.48622000  | 1.99464500  | 4.19524200  |
| H  | 1.08223300  | 0.34279900  | 4.13703400  |

Imaginary Frequency: -462.81

### VIIIa

0 2

|    |             |             |             |
|----|-------------|-------------|-------------|
| Fe | -0.45457700 | -1.06356700 | 0.55316300  |
| N  | 0.32827500  | -2.19207900 | 1.91001300  |
| C  | 1.73598200  | -2.26390900 | 2.32134200  |
| C  | -0.38016200 | -2.82613800 | 2.81607000  |
| C  | 1.68103300  | -2.86495600 | 3.71969300  |
| H  | 2.30040400  | -2.88913400 | 1.61979700  |
| H  | 2.34383100  | -3.71866800 | 3.86736200  |
| N  | -2.18270300 | -1.82902300 | 0.74355800  |
| C  | -2.64156000 | -2.60448200 | 1.76818100  |
| C  | -4.43168400 | -1.80227600 | -0.21787700 |
| C  | -4.02290300 | -2.99423000 | 1.83634900  |
| C  | -4.90302700 | -2.56861200 | 0.79581700  |
| H  | -5.09115400 | -1.47391300 | -1.01259000 |
| H  | -5.94536100 | -2.86618800 | 0.84144200  |
| C  | -1.78514200 | -3.06459900 | 2.81840700  |
| C  | -4.48942800 | -3.75594700 | 2.90732900  |
| C  | -3.64608500 | -4.16369600 | 3.93713300  |
| H  | -4.03105100 | -4.74645500 | 4.76614800  |

|   |             |             |             |
|---|-------------|-------------|-------------|
| C | -2.31333900 | -3.82216600 | 3.88735700  |
| H | -1.63553000 | -4.14024400 | 4.66874200  |
| H | -5.54444100 | -4.01451800 | 2.92645900  |
| O | 0.32655700  | -3.32567300 | 3.85383500  |
| C | -3.06988500 | -1.42018000 | -0.26191600 |
| C | -2.49450900 | -0.61708800 | -1.23952700 |
| C | -0.47350300 | 0.40123100  | -1.99712500 |
| C | -0.17295800 | -0.15086100 | -3.24858500 |
| C | -0.01959900 | 1.68717400  | -1.69733200 |
| C | 0.57666300  | 0.56634500  | -4.17169400 |
| C | 0.72941200  | 2.40217700  | -2.62609700 |
| C | 1.03566800  | 1.84637500  | -3.86434800 |
| H | 0.80696300  | 0.12272200  | -5.13589500 |
| H | 1.08086800  | 3.39875300  | -2.37160400 |
| H | 1.61748600  | 2.40788900  | -4.58905800 |
| H | -0.51500400 | -1.15662400 | -3.47390300 |
| H | -0.25361700 | 2.10967200  | -0.72611800 |
| H | 2.18669200  | -1.26925100 | 2.31550100  |
| H | 1.86881300  | -2.13121600 | 4.51000500  |
| N | -1.17164400 | -0.36381500 | -1.03233800 |
| C | -3.23962500 | -0.01528400 | -2.38425100 |
| H | -4.31742200 | -0.06036300 | -2.23287400 |
| H | -2.96711100 | 1.03586800  | -2.51773900 |
| H | -3.02136400 | -0.51322600 | -3.33614900 |
| C | 2.07349200  | -0.58726100 | -0.32452800 |
| H | 3.55855700  | -0.05729900 | 1.14672600  |
| C | 3.31841000  | 0.19368100  | 0.10263400  |
| H | 2.18438600  | -1.66288900 | -0.18540200 |
| C | 3.04100400  | 1.69702300  | 0.02092500  |
| H | 1.84567300  | -0.40638400 | -1.37563700 |
| H | 2.80607400  | 1.95133200  | -1.01912300 |
| H | 2.12774600  | 1.93322900  | 0.58549800  |
| C | 4.18891700  | 2.58591500  | 0.49490800  |
| H | 4.36418500  | 2.42127000  | 1.56499900  |
| H | 5.11167200  | 2.26982900  | -0.00839500 |
| C | 3.90960300  | 4.03572900  | 0.23096900  |
| C | 4.00984000  | 4.63969400  | -0.96013200 |
| H | 3.54290900  | 4.62763800  | 1.06869200  |
| C | 4.47508000  | 3.93910200  | -2.20083600 |
| C | 3.64063200  | 6.07824900  | -1.14443000 |
| H | 2.84037400  | 6.19044300  | -1.88661700 |
| H | 3.30168700  | 6.53664800  | -0.21366500 |
| H | 4.48760000  | 6.66291100  | -1.52259700 |
| H | 5.29312200  | 4.48954700  | -2.67994600 |
| H | 4.81797800  | 2.91845000  | -2.01853500 |
| H | 3.66844700  | 3.88864100  | -2.94454700 |
| C | 4.50515500  | -0.20593900 | -0.74437200 |
| C | 5.61739000  | -0.82733600 | -0.19149100 |
| C | 4.49603400  | 0.06395700  | -2.11891500 |
| C | 6.70371000  | -1.17035600 | -0.99644400 |
| H | 5.64153000  | -1.03640100 | 0.87457800  |

|    |             |             |             |
|----|-------------|-------------|-------------|
| C  | 5.58661400  | -0.27732400 | -2.91172100 |
| H  | 3.62900000  | 0.54768000  | -2.55968900 |
| C  | 6.71814800  | -0.90669200 | -2.35859400 |
| H  | 7.57071000  | -1.65319800 | -0.55327900 |
| O  | 5.65835900  | -0.03912800 | -4.25109100 |
| C  | 4.55705400  | 0.60883000  | -4.85377000 |
| H  | 4.39138400  | 1.60507300  | -4.42536400 |
| H  | 4.80403100  | 0.70722600  | -5.90974400 |
| H  | 3.63469700  | 0.02480300  | -4.74832100 |
| C  | 7.87492700  | -1.26106000 | -3.23557200 |
| H  | 8.67357000  | -1.73388800 | -2.66180600 |
| H  | 7.57575100  | -1.94461800 | -4.03587800 |
| H  | 8.28537300  | -0.37691100 | -3.73244400 |
| Si | -0.72425600 | 0.81742100  | 2.01683400  |
| H  | 1.22891800  | -0.17346400 | 0.27779800  |
| H  | -0.77331600 | 2.16629600  | 1.39829500  |
| H  | -2.00001100 | 0.66235200  | 2.75647500  |
| C  | 0.66953200  | 0.88834900  | 3.34074700  |
| H  | 1.66170100  | 0.98946200  | 2.88949700  |
| H  | 0.53205700  | 1.73730700  | 4.01621400  |
| H  | 0.66744100  | -0.01813000 | 3.95247300  |

### TS<sub>5b</sub>

0 2

|    |             |             |             |
|----|-------------|-------------|-------------|
| Fe | 0.36397700  | -0.33142300 | 0.13569000  |
| N  | 0.70724400  | -0.65623400 | 2.02222700  |
| C  | 2.00489600  | -0.75641400 | 2.69491200  |
| C  | -0.20976400 | -0.52342600 | 2.94569600  |
| C  | 1.69236600  | -0.40709800 | 4.14669800  |
| H  | 2.39391300  | -1.77353900 | 2.57391800  |
| H  | 2.08800300  | -1.11354900 | 4.87759600  |
| N  | -1.48900400 | -0.83438900 | 0.37338600  |
| C  | -2.23746300 | -0.69982800 | 1.49555500  |
| C  | -3.46132900 | -1.51777200 | -0.86044400 |
| C  | -3.66570000 | -0.83329500 | 1.44730200  |
| C  | -4.25313700 | -1.22453700 | 0.20762800  |
| H  | -3.89922900 | -1.86288700 | -1.79005700 |
| H  | -5.33237300 | -1.32191100 | 0.14901100  |
| C  | -1.62721600 | -0.44780000 | 2.76730100  |
| C  | -4.42474700 | -0.59920500 | 2.59611600  |
| C  | -3.81960900 | -0.28110400 | 3.80831200  |
| H  | -4.42550500 | -0.10485100 | 4.69025100  |
| C  | -2.44151900 | -0.23176800 | 3.89713800  |
| H  | -1.95830600 | -0.05168000 | 4.84993900  |
| H  | -5.50523700 | -0.68740900 | 2.52791100  |
| O  | 0.25148500  | -0.46099200 | 4.21976000  |
| C  | -2.05932500 | -1.34670600 | -0.77732600 |
| C  | -1.13129900 | -1.66392200 | -1.78937200 |
| C  | 1.18480700  | -1.74904600 | -2.37526800 |
| C  | 2.18648900  | -2.64388500 | -1.98302900 |
| C  | 1.25819000  | -1.16836900 | -3.64680000 |

|   |             |             |             |
|---|-------------|-------------|-------------|
| C | 3.22394200  | -2.96529800 | -2.84805600 |
| C | 2.30866800  | -1.47916300 | -4.50221100 |
| C | 3.29363700  | -2.38123100 | -4.11008300 |
| H | 3.98884800  | -3.66729700 | -2.53160600 |
| H | 2.36073900  | -1.01053500 | -5.48031800 |
| H | 4.11116700  | -2.62247000 | -4.78120000 |
| H | 2.12673200  | -3.07654900 | -0.98930300 |
| H | 0.49261000  | -0.45959200 | -3.94982800 |
| H | 2.72151300  | -0.06929600 | 2.23679400  |
| H | 2.00515200  | 0.60560400  | 4.42066100  |
| N | 0.15824200  | -1.44620400 | -1.45673500 |
| C | -1.55894700 | -2.26546400 | -3.09096700 |
| H | -1.74879800 | -1.51138000 | -3.86339200 |
| H | -0.79362400 | -2.93613400 | -3.48582600 |
| H | -2.47707500 | -2.84234500 | -2.97298100 |
| C | 0.17345100  | 1.49104500  | -0.60152400 |
| H | 1.88104400  | -0.14107100 | -0.04089700 |
| C | 1.58757500  | 1.35611900  | -0.33788100 |
| C | 2.51114100  | 1.40240600  | -1.55413100 |
| H | -0.15348500 | 1.43529500  | -1.63844700 |
| H | 1.91149600  | 1.14604500  | -2.43221100 |
| H | 2.80426100  | 2.45111200  | -1.69324100 |
| C | 3.77271300  | 0.50830900  | -1.52342300 |
| H | 3.59440900  | -0.36009900 | -2.16526700 |
| C | 5.05177500  | 1.18417200  | -1.93295600 |
| H | 5.80455200  | 1.32150900  | -1.15614900 |
| C | 5.35125900  | 1.63094100  | -3.15896200 |
| C | 6.65825400  | 2.29690500  | -3.45530600 |
| H | 6.50954500  | 3.31175300  | -3.84321200 |
| H | 7.29381500  | 2.36440900  | -2.57032500 |
| H | 7.21340500  | 1.75514400  | -4.23055000 |
| C | 4.41816800  | 1.50709500  | -4.32295600 |
| H | 3.50480700  | 0.96479100  | -4.07679400 |
| H | 4.13159800  | 2.49523100  | -4.70315100 |
| H | 4.90163100  | 0.98737000  | -5.15942100 |
| C | 2.11086400  | 2.05562500  | 0.88917600  |
| C | 1.26019600  | 2.35912000  | 1.96764900  |
| C | 3.44688200  | 2.44735400  | 0.99398700  |
| C | 1.73621100  | 3.00970700  | 3.09867800  |
| C | 3.91591400  | 3.08689000  | 2.14094000  |
| H | 4.13844300  | 2.27950200  | 0.17829500  |
| C | 3.09052700  | 3.37404100  | 3.21685800  |
| H | 4.96177600  | 3.37801500  | 2.19674900  |
| C | 3.57750700  | 4.04825300  | 4.45750200  |
| H | 3.03452200  | 4.97909400  | 4.64644800  |
| H | 3.41749600  | 3.42408600  | 5.34296200  |
| H | 4.64203600  | 4.27841400  | 4.38929500  |
| H | -0.44569300 | 2.13485700  | 0.01785800  |
| H | 3.89598800  | 0.09354800  | -0.51638300 |
| O | 0.96593900  | 3.32707300  | 4.17859000  |
| C | -0.41701800 | 3.03665300  | 4.10685100  |

|   |             |            |            |
|---|-------------|------------|------------|
| H | -0.60189300 | 1.95920900 | 4.03995800 |
| H | -0.85322500 | 3.41630700 | 5.02954500 |
| H | -0.88989100 | 3.53459700 | 3.25223600 |
| H | 0.21759100  | 2.07123800 | 1.92205100 |

Imaginary Frequency: -606.91

## VIIb

0 2

|    |             |             |             |
|----|-------------|-------------|-------------|
| Fe | 0.64101400  | -1.65300500 | -0.36679800 |
| N  | 0.38001300  | -3.01013300 | 0.99735500  |
| C  | 1.03787800  | -4.31953800 | 1.06970100  |
| C  | -0.57419700 | -3.00006100 | 1.89916100  |
| C  | 0.50574900  | -4.91490000 | 2.36284600  |
| H  | 0.77450500  | -4.91190700 | 0.18551600  |
| H  | 0.19676200  | -5.95822400 | 2.29219000  |
| N  | -0.92235700 | -0.57415400 | 0.29639000  |
| C  | -1.64186800 | -0.76227700 | 1.43136600  |
| C  | -1.93536600 | 1.61315000  | 0.01766400  |
| C  | -2.56158000 | 0.23639200  | 1.89971100  |
| C  | -2.67108700 | 1.44087100  | 1.15494200  |
| H  | -2.00342200 | 2.53707300  | -0.54464000 |
| H  | -3.34446300 | 2.21500700  | 1.50903500  |
| C  | -1.51259000 | -1.96416300 | 2.20802900  |
| C  | -3.31954000 | 0.02187500  | 3.05816000  |
| C  | -3.20425800 | -1.16201000 | 3.77731700  |
| H  | -3.80198300 | -1.32423200 | 4.66745100  |
| C  | -2.31663000 | -2.13408800 | 3.35643500  |
| H  | -2.21101400 | -3.05326700 | 3.91813500  |
| H  | -4.00467500 | 0.80150800  | 3.37821300  |
| O  | -0.65712100 | -4.12426700 | 2.65752900  |
| C  | -1.06449400 | 0.59636400  | -0.41704500 |
| C  | -0.28498300 | 0.69377700  | -1.61220000 |
| C  | 1.30787000  | -0.41453200 | -3.01884900 |
| C  | 1.27601000  | -1.61625600 | -3.73593200 |
| C  | 2.16465900  | 0.60400500  | -3.44952600 |
| C  | 2.05981200  | -1.78522100 | -4.86678700 |
| C  | 2.95738100  | 0.42495700  | -4.57747200 |
| C  | 2.90645300  | -0.76524900 | -5.29431800 |
| H  | 2.01750500  | -2.72185700 | -5.41328600 |
| H  | 3.62407600  | 1.22142700  | -4.89292800 |
| H  | 3.52735200  | -0.90143000 | -6.17319500 |
| H  | 0.63328900  | -2.41579100 | -3.37871700 |
| H  | 2.22527200  | 1.52248000  | -2.87617200 |
| H  | 2.12336800  | -4.20812400 | 1.07297800  |
| H  | 1.20807100  | -4.81041800 | 3.19780600  |
| N  | 0.53490300  | -0.32313000 | -1.84474500 |
| C  | -0.47153700 | 1.84983100  | -2.54320600 |
| H  | -1.51167800 | 2.17781300  | -2.56092000 |
| H  | 0.13702400  | 2.71129900  | -2.24215200 |
| H  | -0.18119500 | 1.58987400  | -3.56088300 |
| C  | 2.54392800  | -2.28826800 | -0.72821500 |



|   |             |             |             |
|---|-------------|-------------|-------------|
| H | 3.08143100  | -2.29837000 | 1.36247600  |
| C | 3.35541300  | -1.73695200 | 0.45337700  |
| C | 4.86965700  | -1.87878600 | 0.26889400  |
| H | 5.10307600  | -2.93415300 | 0.07600400  |
| H | 5.18029600  | -1.34394100 | -0.63881900 |
| C | 5.69002800  | -1.38798800 | 1.46451300  |
| H | 5.38129600  | -1.93895300 | 2.36071000  |
| C | 7.16234800  | -1.49987600 | 1.23967500  |
| H | 7.58586200  | -0.75072100 | 0.56881300  |
| C | 8.00088000  | -2.42541100 | 1.72273500  |
| C | 9.45775300  | -2.40866400 | 1.37527400  |
| H | 9.76133600  | -3.34048500 | 0.88292800  |
| H | 9.71088900  | -1.57921200 | 0.71229800  |
| H | 10.08051200 | -2.32476900 | 2.27424500  |
| C | 7.58935700  | -3.54516600 | 2.62789900  |
| H | 6.52284500  | -3.54770200 | 2.85387900  |
| H | 7.83647100  | -4.51488800 | 2.17971700  |
| H | 8.13470500  | -3.50479700 | 3.57838300  |
| C | 2.91469800  | -0.30344600 | 0.68866300  |
| C | 2.04681200  | 0.00025400  | 1.74608200  |
| C | 3.25207100  | 0.71184400  | -0.20477100 |
| C | 1.50183100  | 1.27695500  | 1.88096000  |
| C | 2.69553000  | 1.98007000  | -0.06640400 |
| H | 3.92016900  | 0.50064700  | -1.03476800 |
| C | 1.80433100  | 2.28993400  | 0.95536600  |
| H | 2.95702600  | 2.76329600  | -0.77586400 |
| C | 1.17852100  | 3.63967300  | 1.09715100  |
| H | 1.52425400  | 4.31897000  | 0.31518000  |
| H | 0.08598500  | 3.57844900  | 1.04430500  |
| H | 1.40694300  | 4.08952300  | 2.06807200  |
| H | 5.42963300  | -0.33903900 | 1.65919900  |
| H | 2.92417500  | -1.83729100 | -1.65483200 |
| H | 2.68348200  | -3.37311800 | -0.82621300 |
| O | 0.64578700  | 1.64247600  | 2.87525300  |
| C | 0.42043100  | 0.71717300  | 3.92118900  |
| H | 1.35791200  | 0.45019400  | 4.42394700  |
| H | -0.24244900 | 1.21519800  | 4.62743000  |
| H | -0.06806400 | -0.19567200 | 3.56342700  |
| H | 1.78317600  | -0.78752300 | 2.44566700  |

**TS<sub>6b</sub>**

0 2

|    |             |             |            |
|----|-------------|-------------|------------|
| Fe | 0.20771000  | -1.18918000 | 0.64309300 |
| N  | 0.62779000  | -2.32198800 | 2.20191100 |
| C  | 1.90166400  | -2.32426800 | 2.92521900 |
| C  | -0.20970800 | -3.04430500 | 2.88701500 |
| C  | 1.68329400  | -3.29663700 | 4.07795800 |
| H  | 2.71105100  | -2.63915300 | 2.26289300 |
| H  | 2.24554100  | -4.22892800 | 3.97207000 |
| N  | -1.65761100 | -1.86175500 | 0.63680700 |
| C  | -2.27888700 | -2.73124900 | 1.49568600 |

|   |             |             |             |
|---|-------------|-------------|-------------|
| C | -3.74625100 | -1.68100900 | -0.61952100 |
| C | -3.65422900 | -3.09791500 | 1.32121200  |
| C | -4.37009000 | -2.54711400 | 0.22329600  |
| H | -4.27529600 | -1.25870000 | -1.46497700 |
| H | -5.40771400 | -2.82953800 | 0.07835000  |
| C | -1.59442900 | -3.31169500 | 2.60623600  |
| C | -4.28037200 | -3.97717600 | 2.21556600  |
| C | -3.59803200 | -4.51640800 | 3.29219700  |
| H | -4.09307200 | -5.19234100 | 3.97990500  |
| C | -2.26760900 | -4.18342100 | 3.47864100  |
| H | -1.71411200 | -4.59822800 | 4.31069600  |
| H | -5.32434500 | -4.22266600 | 2.04242300  |
| O | 0.28233000  | -3.61299200 | 4.01043700  |
| C | -2.39559600 | -1.33280100 | -0.41224100 |
| C | -1.69293000 | -0.42980300 | -1.23964300 |
| C | 0.36104900  | 0.62978100  | -1.70177300 |
| C | 0.70358500  | 0.28728000  | -3.01172200 |
| C | 0.76241700  | 1.86372400  | -1.19140100 |
| C | 1.41721600  | 1.17749500  | -3.80501400 |
| C | 1.45856600  | 2.75732800  | -1.99492900 |
| C | 1.78755900  | 2.42052100  | -3.30342700 |
| H | 1.68290500  | 0.89765200  | -4.81964500 |
| H | 1.75431100  | 3.71965000  | -1.58754300 |
| H | 2.34736000  | 3.11695700  | -3.91990200 |
| H | 0.40189800  | -0.68245700 | -3.39718200 |
| H | 0.50756800  | 2.12644800  | -0.16974900 |
| H | 2.13004700  | -1.30598000 | 3.26239000  |
| H | 1.88611100  | -2.87593600 | 5.06474300  |
| N | -0.40602300 | -0.26842800 | -0.90982900 |
| C | -2.34995400 | 0.32054100  | -2.35556000 |
| H | -3.41837200 | 0.44401900  | -2.17887600 |
| H | -1.91516000 | 1.31580000  | -2.46413200 |
| H | -2.23239500 | -0.17981700 | -3.32366400 |
| C | 2.10952300  | -1.37566100 | -0.06807800 |
| H | 3.34732700  | -0.67882400 | 1.56301900  |
| C | 3.44776800  | -0.85952700 | 0.48408700  |
| C | 4.55159200  | -1.91353400 | 0.33125700  |
| H | 4.19775500  | -2.85645000 | 0.77154800  |
| H | 4.71774800  | -2.14443500 | -0.72890200 |
| C | 5.87103300  | -1.52238200 | 1.00141800  |
| H | 5.64930800  | -1.17109400 | 2.01867300  |
| C | 6.86178900  | -2.64474500 | 1.03587700  |
| H | 7.60279700  | -2.66632200 | 0.23726800  |
| C | 6.88709500  | -3.64450800 | 1.92644100  |
| C | 7.90064700  | -4.74279600 | 1.84665600  |
| H | 7.41965100  | -5.72402000 | 1.75388000  |
| H | 8.57319000  | -4.61615100 | 0.99641500  |
| H | 8.51070700  | -4.78910900 | 2.75676000  |
| C | 5.91148600  | -3.76615300 | 3.05785600  |
| H | 5.25415500  | -2.89916800 | 3.15045000  |
| H | 5.27769900  | -4.65311400 | 2.92980700  |

|    |             |             |             |
|----|-------------|-------------|-------------|
| H  | 6.42948000  | -3.89973600 | 4.01456300  |
| C  | 3.84349600  | 0.47121300  | -0.11709500 |
| C  | 3.65741000  | 1.64805000  | 0.61301300  |
| C  | 4.40781900  | 0.55912100  | -1.38730100 |
| C  | 4.02785600  | 2.88098700  | 0.08109600  |
| C  | 4.80986400  | 1.79114200  | -1.89273000 |
| H  | 4.54572300  | -0.33737500 | -1.98467100 |
| C  | 4.63733500  | 2.97086200  | -1.18011700 |
| H  | 5.25584500  | 1.84617900  | -2.88302900 |
| C  | 5.01635100  | 4.30506000  | -1.73635800 |
| H  | 5.49830300  | 4.20171600  | -2.71051300 |
| H  | 4.13965900  | 4.95154200  | -1.85742200 |
| H  | 5.69687500  | 4.84518300  | -1.07166100 |
| H  | 6.29693700  | -0.65690700 | 0.48268000  |
| H  | 2.05338900  | -1.15213600 | -1.13821300 |
| H  | 2.06338400  | -2.47261700 | 0.04621200  |
| Si | -0.27907900 | 0.63982100  | 2.05691800  |
| H  | -1.35507000 | 1.43435000  | 1.41562700  |
| H  | 1.23818200  | -0.14339300 | 0.88392100  |
| H  | 0.79117500  | 1.62217800  | 2.37535400  |
| C  | -0.91970900 | 0.02197500  | 3.74860000  |
| H  | -0.13679300 | -0.48226200 | 4.32141800  |
| H  | -1.27584700 | 0.86262800  | 4.35045000  |
| H  | -1.74883000 | -0.67937500 | 3.63066800  |
| O  | 3.81537500  | 4.07691300  | 0.70497000  |
| C  | 3.10245500  | 4.05084100  | 1.92376200  |
| H  | 3.64586100  | 3.50231500  | 2.70280400  |
| H  | 2.98905900  | 5.08900500  | 2.23249500  |
| H  | 2.11160100  | 3.59556300  | 1.80135200  |
| H  | 3.20013200  | 1.58469600  | 1.59570100  |

Imaginary Frequency: -430.97

### VIIIb

0 2

|    |             |             |             |
|----|-------------|-------------|-------------|
| Fe | -0.71685400 | -0.76124100 | 0.52927800  |
| N  | -0.36590800 | -1.29187000 | 2.32395400  |
| C  | 0.91138900  | -1.25629000 | 3.04262700  |
| C  | -1.28030500 | -1.70807800 | 3.16397500  |
| C  | 0.47155200  | -1.27449900 | 4.49464500  |
| H  | 1.50226100  | -2.14069500 | 2.76996500  |
| H  | 1.08298400  | -1.88883800 | 5.15509800  |
| N  | -2.46945900 | -1.68715500 | 0.49131700  |
| C  | -3.19086500 | -2.10191500 | 1.56624600  |
| C  | -4.33345900 | -2.19855400 | -0.97328800 |
| C  | -4.53244400 | -2.57914700 | 1.40725300  |
| C  | -5.07634100 | -2.61806700 | 0.09227400  |
| H  | -4.74601300 | -2.21892200 | -1.97560200 |
| H  | -6.09103000 | -2.97950000 | -0.04119800 |
| C  | -2.64151600 | -2.07325200 | 2.89165600  |
| C  | -5.28000200 | -2.97601900 | 2.52446400  |
| C  | -4.74021700 | -2.92057700 | 3.80099400  |

|   |             |             |             |
|---|-------------|-------------|-------------|
| H | -5.32962000 | -3.22180800 | 4.65961100  |
| C | -3.44001300 | -2.47765700 | 3.97699100  |
| H | -3.00717700 | -2.44092200 | 4.96877900  |
| H | -6.29953700 | -3.31661200 | 2.36883200  |
| O | -0.84670000 | -1.85882600 | 4.44056800  |
| C | -3.02004500 | -1.73004700 | -0.77082700 |
| C | -2.16001000 | -1.28423800 | -1.81337200 |
| C | 0.05823900  | -0.58037200 | -2.34039900 |
| C | 0.53164900  | -1.65847100 | -3.10040000 |
| C | 0.69519900  | 0.65871700  | -2.45186900 |
| C | 1.62694300  | -1.50154900 | -3.93908600 |
| C | 1.79025800  | 0.80847400  | -3.29195000 |
| C | 2.26674200  | -0.26885200 | -4.03479900 |
| H | 1.99117200  | -2.35021500 | -4.50955000 |
| H | 2.27650300  | 1.77678800  | -3.36152900 |
| H | 3.12751400  | -0.14888400 | -4.68431900 |
| H | 0.04944600  | -2.62642500 | -2.99747400 |
| H | 0.31687800  | 1.50034800  | -1.88485600 |
| H | 1.48859900  | -0.37187200 | 2.76369200  |
| H | 0.37708800  | -0.26696500 | 4.91676200  |
| N | -0.99275800 | -0.77118500 | -1.41532000 |
| C | -2.57799900 | -1.36162400 | -3.24757300 |
| H | -2.54783100 | -2.38604500 | -3.63404000 |
| H | -3.60412600 | -1.00616300 | -3.37048500 |
| H | -1.93260700 | -0.75343200 | -3.88062800 |
| C | 2.77724900  | -1.64430500 | -0.29292900 |
| H | 3.87883700  | -1.69626900 | 1.54747400  |
| C | 3.99125300  | -1.25143000 | 0.54642100  |
| C | 5.27910800  | -1.81497500 | -0.06252800 |
| H | 5.16738200  | -2.89828900 | -0.20043600 |
| H | 5.41160000  | -1.40113400 | -1.07198200 |
| C | 6.52818100  | -1.53641500 | 0.77290000  |
| H | 6.38780600  | -1.94820200 | 1.77894400  |
| C | 7.77273000  | -2.06288400 | 0.13863900  |
| H | 8.05100400  | -1.57207000 | -0.79566900 |
| C | 8.55930900  | -3.06305600 | 0.55536100  |
| C | 9.77318100  | -3.46625300 | -0.22453200 |
| H | 9.71907600  | -4.51810400 | -0.52988400 |
| H | 9.90321600  | -2.86017100 | -1.12298700 |
| H | 10.68317600 | -3.37336700 | 0.38043400  |
| C | 8.32947400  | -3.86244900 | 1.80049700  |
| H | 7.42779700  | -3.57500700 | 2.34114400  |
| H | 8.25155300  | -4.93047600 | 1.56579100  |
| H | 9.17733400  | -3.76654100 | 2.48906100  |
| C | 4.04631100  | 0.24898500  | 0.72759700  |
| C | 3.90425500  | 0.81206000  | 1.99875100  |
| C | 4.20220200  | 1.09940400  | -0.36313100 |
| C | 3.87982900  | 2.19483800  | 2.16723600  |
| C | 4.18850300  | 2.47937300  | -0.18309400 |
| H | 4.30984400  | 0.68646100  | -1.36251300 |
| C | 4.01445000  | 3.05804200  | 1.06827900  |

|    |             |             |             |
|----|-------------|-------------|-------------|
| H  | 4.29545400  | 3.13492500  | -1.04408200 |
| C  | 3.94057700  | 4.53656700  | 1.26897200  |
| H  | 4.10579700  | 5.06984000  | 0.33136800  |
| H  | 2.96143600  | 4.83164900  | 1.66082500  |
| H  | 4.67768100  | 4.88354600  | 1.99895900  |
| H  | 6.61934600  | -0.44976400 | 0.90810800  |
| H  | 2.86439900  | -1.25734100 | -1.31321900 |
| H  | 2.66592300  | -2.73163900 | -0.35772700 |
| Si | 0.14608800  | 1.50778800  | 0.78278800  |
| H  | -0.68808900 | 2.47544700  | 0.01560700  |
| H  | 1.85150400  | -1.22648400 | 0.12321100  |
| H  | 1.52526900  | 1.74916700  | 0.29354300  |
| C  | 0.12870900  | 2.15134100  | 2.60154500  |
| H  | 0.89358700  | 1.65611700  | 3.20593700  |
| H  | 0.34460100  | 3.22324900  | 2.64025400  |
| H  | -0.83695500 | 1.98605500  | 3.08738900  |
| O  | 3.71837700  | 2.81372600  | 3.37363100  |
| C  | 3.62446600  | 1.99526300  | 4.51558000  |
| H  | 4.52506700  | 1.38391200  | 4.65289600  |
| H  | 3.51141500  | 2.66662400  | 5.36547800  |
| H  | 2.75066400  | 1.33063200  | 4.46935600  |
| H  | 3.81658600  | 0.15056200  | 2.85506300  |

### TS<sub>sc</sub>

0 2

|    |             |             |             |
|----|-------------|-------------|-------------|
| Fe | 0.60917100  | 0.09276900  | -0.07450700 |
| N  | 1.85627000  | 0.17042000  | 1.41559000  |
| C  | 3.32010800  | 0.24094000  | 1.40269600  |
| C  | 1.46921300  | 0.45856100  | 2.63519900  |
| C  | 3.63112500  | 1.04972700  | 2.64979000  |
| H  | 3.72483300  | -0.77736500 | 1.45266700  |
| H  | 4.49561500  | 0.71034400  | 3.21982700  |
| N  | -0.78315800 | -0.53335700 | 1.12863600  |
| C  | -0.90846300 | -0.26706400 | 2.45259400  |
| C  | -2.91586000 | -1.69962400 | 1.17630000  |
| C  | -2.11380000 | -0.58374900 | 3.16291500  |
| C  | -3.12036500 | -1.31794400 | 2.46552600  |
| H  | -3.66503300 | -2.28124400 | 0.65114400  |
| H  | -4.03515500 | -1.57541700 | 2.99077800  |
| C  | 0.15753200  | 0.34568900  | 3.18886100  |
| C  | -2.26839000 | -0.17389800 | 4.48806800  |
| C  | -1.25847600 | 0.51332500  | 5.15530900  |
| H  | -1.40657300 | 0.84497000  | 6.17752400  |
| C  | -0.05445300 | 0.74871400  | 4.52131500  |
| H  | 0.75784200  | 1.23732300  | 5.04496300  |
| H  | -3.20533900 | -0.40138200 | 4.98921900  |
| O  | 2.45929600  | 0.86713900  | 3.46848500  |
| C  | -1.73649900 | -1.31366600 | 0.49095500  |
| C  | -1.41668300 | -1.66326700 | -0.83076000 |
| C  | 0.22959000  | -1.45371500 | -2.57483100 |
| C  | 1.55994100  | -1.85227600 | -2.75587500 |

|   |             |             |             |
|---|-------------|-------------|-------------|
| C | -0.56798400 | -1.25884000 | -3.71050800 |
| C | 2.07249700  | -2.05716700 | -4.02944900 |
| C | -0.04844700 | -1.45467300 | -4.98350900 |
| C | 1.27259300  | -1.85796200 | -5.15131600 |
| H | 3.10439800  | -2.37299600 | -4.14720500 |
| H | -0.67802800 | -1.28089200 | -5.85064900 |
| H | 1.67552500  | -2.01196200 | -6.14667200 |
| H | 2.17368700  | -1.99277600 | -1.87208700 |
| H | -1.58853400 | -0.91032500 | -3.58951400 |
| H | 3.68287500  | 0.69334500  | 0.47941100  |
| H | 3.73608600  | 2.12199300  | 2.44217800  |
| N | -0.21936000 | -1.19358300 | -1.26384300 |
| C | -2.29114900 | -2.58022400 | -1.62813600 |
| H | -2.81206000 | -3.28138500 | -0.97417600 |
| H | -3.05738300 | -2.05344800 | -2.20872500 |
| H | -1.70445500 | -3.16618900 | -2.33755300 |
| C | -0.03999500 | 1.94745100  | -0.39878500 |
| H | 1.76945900  | 0.30507100  | -1.03810700 |
| C | 1.11795200  | 1.77998300  | -1.23798600 |
| C | 0.87011600  | 1.69818200  | -2.72696600 |
| C | 2.37806000  | 2.55349100  | -0.91491400 |
| H | 3.24888800  | 2.12567000  | -1.42160400 |
| H | -1.00811300 | 1.84765600  | -0.90042500 |
| H | 2.27731500  | 3.58876400  | -1.26282500 |
| H | 1.63703200  | 1.11963100  | -3.25159500 |
| H | -0.09654800 | 1.24539200  | -2.95007600 |
| H | 0.86810000  | 2.71024400  | -3.15050100 |
| H | 2.59224200  | 2.59061300  | 0.15410500  |
| C | -0.08152700 | 2.78373100  | 0.84855700  |
| H | 0.91167000  | 2.86409800  | 1.30523300  |
| H | -0.70147100 | 2.29081500  | 1.60448600  |
| C | -0.63360600 | 4.20014500  | 0.62968200  |
| H | -0.00761600 | 4.74277900  | -0.08661100 |
| H | -1.62286200 | 4.12246900  | 0.15677800  |
| C | -0.73093000 | 4.99273400  | 1.90767200  |
| C | -0.07637700 | 6.15466200  | 2.03670700  |
| C | -1.55372300 | 4.43440600  | 3.00388000  |
| C | -1.28875900 | 4.72591400  | 4.34372700  |
| C | -2.62247100 | 3.57060600  | 2.71792000  |
| C | -2.08313100 | 4.19170000  | 5.35203400  |
| H | -0.44164800 | 5.35287300  | 4.59994400  |
| C | -3.39938200 | 3.02907700  | 3.73479500  |
| C | -3.14850600 | 3.34126600  | 5.08167900  |
| H | -1.86038700 | 4.42673800  | 6.38983000  |
| C | -3.99537900 | 2.74510600  | 6.15722800  |
| H | -5.04748900 | 3.02259300  | 6.04031800  |
| H | -3.96789300 | 1.65103300  | 6.12529900  |
| H | -3.66381900 | 3.06879200  | 7.14562100  |
| H | -0.15107100 | 6.76430200  | 2.93045300  |
| H | 0.54104100  | 6.54174100  | 1.23300000  |
| O | -4.43366200 | 2.16728200  | 3.51971500  |

|   |             |            |            |
|---|-------------|------------|------------|
| C | -4.69182000 | 1.79491000 | 2.18135700 |
| H | -3.81321900 | 1.33219200 | 1.71377800 |
| H | -5.49831200 | 1.06381900 | 2.21869100 |
| H | -5.00955300 | 2.65484600 | 1.57885000 |
| H | -2.84554900 | 3.32907900 | 1.68658600 |

Imaginary Frequency: -528.68

### VIIIc

0 2

|    |             |             |             |
|----|-------------|-------------|-------------|
| Fe | 0.06621900  | -0.47209700 | 0.25054200  |
| N  | -0.44582300 | 0.45006000  | 1.88725500  |
| C  | -0.29117500 | 1.86960200  | 2.25215300  |
| C  | -1.05095700 | -0.13231900 | 2.89585000  |
| C  | -1.23843400 | 2.03859800  | 3.42225000  |
| H  | 0.74599300  | 2.06453000  | 2.54957200  |
| H  | -0.85166500 | 2.66068300  | 4.22965200  |
| N  | -0.98153600 | -2.11023000 | 0.74121300  |
| C  | -1.41965200 | -2.45717700 | 1.98107700  |
| C  | -1.57228000 | -4.31442500 | -0.08557100 |
| C  | -1.92770300 | -3.77152500 | 2.24283600  |
| C  | -1.98225900 | -4.69291400 | 1.16033600  |
| H  | -1.60946600 | -5.01272800 | -0.91406400 |
| H  | -2.35970900 | -5.69366100 | 1.34550300  |
| C  | -1.42633500 | -1.50992300 | 3.05790600  |
| C  | -2.36185800 | -4.12378700 | 3.52862600  |
| C  | -2.34252600 | -3.20018400 | 4.56265800  |
| H  | -2.68176700 | -3.47826200 | 5.55425000  |
| C  | -1.89759400 | -1.91089100 | 4.32214900  |
| H  | -1.90284000 | -1.17867200 | 5.11944100  |
| H  | -2.71821300 | -5.13627800 | 3.69464000  |
| O  | -1.39753000 | 0.69813300  | 3.91686900  |
| C  | -1.06705200 | -3.01550500 | -0.29283000 |
| C  | -0.58751000 | -2.54910600 | -1.55226900 |
| C  | 0.55461100  | -0.75367300 | -2.66725000 |
| C  | 1.50096400  | -1.40489500 | -3.46697300 |
| C  | 0.26259800  | 0.58969100  | -2.93058600 |
| C  | 2.13114700  | -0.72708000 | -4.50368600 |
| C  | 0.89100400  | 1.26087900  | -3.96901000 |
| C  | 1.83072100  | 0.60614200  | -4.76184300 |
| H  | 2.87462700  | -1.24215500 | -5.10382000 |
| H  | 0.65177700  | 2.30310900  | -4.15615200 |
| H  | 2.33031200  | 1.13354400  | -5.56722200 |
| H  | 1.77074300  | -2.43158500 | -3.24093700 |
| H  | -0.45754200 | 1.09758900  | -2.29399200 |
| H  | -0.51466200 | 2.52263600  | 1.40531000  |
| H  | -2.22606000 | 2.41162600  | 3.12469600  |
| N  | -0.01083900 | -1.34902400 | -1.52544300 |
| C  | -0.78707000 | -3.35515500 | -2.79681200 |
| H  | -1.74717100 | -3.87416000 | -2.77602600 |
| H  | -0.76374200 | -2.72089400 | -3.68328300 |
| H  | -0.01148900 | -4.11871300 | -2.92713400 |

|   |             |             |             |
|---|-------------|-------------|-------------|
| C | 1.97396100  | 0.14379000  | -0.06634100 |
| H | 2.34737000  | -1.56737600 | 1.17038400  |
| C | 2.83607800  | -0.59508100 | 0.97460400  |
| C | 4.22651600  | -0.93413500 | 0.42969800  |
| C | 2.94950800  | 0.11061400  | 2.32109500  |
| H | 3.53893700  | -0.48401000 | 3.02568500  |
| H | 2.26493200  | -0.22096600 | -1.05874300 |
| H | 3.44141200  | 1.08602800  | 2.23061000  |
| H | 4.79845300  | -1.54631000 | 1.13577400  |
| H | 4.15670700  | -1.48657500 | -0.51205400 |
| H | 4.81104200  | -0.02984500 | 0.23185400  |
| H | 1.96968500  | 0.27594300  | 2.77693100  |
| C | 2.01558500  | 1.65535300  | -0.06115600 |
| H | 1.76676200  | 2.02300300  | 0.93415900  |
| H | 1.22447900  | 2.04596400  | -0.72114100 |
| C | 3.31672400  | 2.37289200  | -0.47353100 |
| H | 4.13741500  | 2.03677900  | 0.17352800  |
| H | 3.59407500  | 2.11595400  | -1.50211200 |
| C | 3.11854700  | 3.85650400  | -0.32448800 |
| C | 3.11041200  | 4.70048700  | -1.36037500 |
| C | 2.77850300  | 4.30015600  | 1.05133400  |
| C | 3.57471000  | 3.95238700  | 2.14228400  |
| C | 1.57686300  | 4.98051000  | 1.28923400  |
| C | 3.18295800  | 4.29135700  | 3.43403700  |
| H | 4.50816900  | 3.42183300  | 1.98265700  |
| C | 1.18162300  | 5.28625500  | 2.58886100  |
| C | 1.98745100  | 4.95226900  | 3.69144400  |
| H | 3.81968900  | 4.02738600  | 4.27441200  |
| C | 1.54599100  | 5.30458600  | 5.07537500  |
| H | 2.27331400  | 4.97066500  | 5.81696500  |
| H | 1.41172900  | 6.38461300  | 5.18909500  |
| H | 0.57797900  | 4.85635800  | 5.31964100  |
| H | 2.92196200  | 5.76165600  | -1.22959000 |
| H | 3.31521700  | 4.35549000  | -2.36910000 |
| O | -0.00178500 | 5.89065300  | 2.90482100  |
| C | -0.85402900 | 6.24727900  | 1.83770800  |
| H | -1.17994000 | 5.36810500  | 1.26712700  |
| H | -1.72329200 | 6.72356000  | 2.28839500  |
| H | -0.37157600 | 6.95222400  | 1.15067800  |
| H | 0.94205900  | 5.21567600  | 0.44216800  |

### TS<sub>6c</sub>

0 2

|    |             |             |            |
|----|-------------|-------------|------------|
| Fe | -0.42704200 | -0.63247800 | 0.08440400 |
| N  | -1.08751400 | 0.12154500  | 1.76095500 |
| C  | -1.36271500 | 1.54284400  | 2.01499100 |
| C  | -1.66939800 | -0.54177600 | 2.72037400 |
| C  | -1.69885800 | 1.55888300  | 3.49082900 |
| H  | -0.51452700 | 2.17357700  | 1.75839900 |
| H  | -0.81932900 | 1.74603200  | 4.11988900 |
| N  | -1.19673600 | -2.41939300 | 0.52289400 |



|   |             |             |             |
|---|-------------|-------------|-------------|
| C | -1.72372900 | -2.84343100 | 1.70546200  |
| C | -1.45547800 | -4.66127000 | -0.38321300 |
| C | -2.11800700 | -4.21144200 | 1.89117600  |
| C | -1.97905900 | -5.10507000 | 0.79343000  |
| H | -1.32718700 | -5.33769500 | -1.22011600 |
| H | -2.28725800 | -6.13829500 | 0.91782500  |
| C | -1.91006600 | -1.95383000 | 2.81329200  |
| C | -2.62676800 | -4.64772300 | 3.12109700  |
| C | -2.77602100 | -3.77356200 | 4.18738500  |
| H | -3.16887400 | -4.12180000 | 5.13586400  |
| C | -2.42824100 | -2.44416000 | 4.02537200  |
| H | -2.55930100 | -1.74347200 | 4.84014000  |
| H | -2.90590400 | -5.69300500 | 3.21809500  |
| O | -2.15458400 | 0.21611100  | 3.73849900  |
| C | -1.03910700 | -3.31988900 | -0.51200400 |
| C | -0.42927600 | -2.81312800 | -1.68983400 |
| C | 0.65588700  | -0.95677400 | -2.70936400 |
| C | 1.79084200  | -1.54921900 | -3.28009900 |
| C | 0.24389000  | 0.29301100  | -3.19030900 |
| C | 2.49372400  | -0.90954800 | -4.29293700 |
| C | 0.94596400  | 0.92380400  | -4.20798500 |
| C | 2.07705200  | 0.33159400  | -4.76304000 |
| H | 3.37718500  | -1.38214100 | -4.71056600 |
| H | 0.60549900  | 1.88907800  | -4.56932100 |
| H | 2.62811600  | 0.83213000  | -5.55187900 |
| H | 2.13009700  | -2.50943800 | -2.90310800 |
| H | -0.62761700 | 0.76721900  | -2.75263100 |
| H | -2.21106300 | 1.85296300  | 1.38923700  |
| H | -2.49583200 | 2.24451300  | 3.77680400  |
| N | -0.00436100 | -1.54980900 | -1.61180600 |
| C | -0.40556900 | -3.63194900 | -2.94472600 |
| H | -0.29254000 | -3.00030200 | -3.82570600 |
| H | 0.41203700  | -4.36167600 | -2.96310400 |
| H | -1.33781000 | -4.19084400 | -3.05557400 |
| C | 1.27822900  | 0.44761100  | -0.01341600 |
| H | 0.97562900  | -1.43235000 | 1.03880500  |
| C | 1.78625600  | -0.65266800 | 0.92335800  |
| C | 2.94588800  | -1.43255000 | 0.30702800  |
| C | 2.09294400  | -0.22168500 | 2.35227800  |
| H | 2.28223600  | -1.09428900 | 2.98387800  |
| H | 1.69024600  | 0.28645100  | -1.01227100 |
| H | 2.98799200  | 0.40641300  | 2.39156000  |
| H | 3.23769400  | -2.28204300 | 0.93227100  |
| H | 2.67584100  | -1.81270900 | -0.68085100 |
| H | 3.82339000  | -0.78902000 | 0.18613100  |
| H | 1.26888600  | 0.33693500  | 2.80102400  |
| C | 1.57801900  | 1.88766500  | 0.36283700  |
| H | 1.35558600  | 2.09267300  | 1.41335900  |
| H | 0.93706300  | 2.56192000  | -0.22091500 |
| C | 3.03773500  | 2.27561800  | 0.09130700  |
| H | 3.70286600  | 1.67451300  | 0.72690500  |

|    |             |             |             |
|----|-------------|-------------|-------------|
| H  | 3.29695800  | 2.01302200  | -0.94091900 |
| C  | 3.30224200  | 3.74276600  | 0.30702300  |
| C  | 3.74206400  | 4.50945900  | -0.69913300 |
| C  | 3.03448600  | 4.30250100  | 1.65029100  |
| C  | 3.18945000  | 3.53100400  | 2.80380200  |
| C  | 2.60493800  | 5.63071800  | 1.79700300  |
| C  | 2.94288100  | 4.07784800  | 4.05974700  |
| H  | 3.52563800  | 2.50274700  | 2.72768700  |
| C  | 2.36080200  | 6.16575000  | 3.05626400  |
| C  | 2.52603600  | 5.39255900  | 4.22047800  |
| H  | 3.08009400  | 3.46519700  | 4.94702300  |
| C  | 2.24714300  | 5.99261800  | 5.55947800  |
| H  | 2.41422500  | 5.26874300  | 6.35863500  |
| H  | 2.88214700  | 6.86391200  | 5.74623600  |
| H  | 1.21615200  | 6.35246600  | 5.63003000  |
| H  | 3.96583500  | 5.56262000  | -0.56654400 |
| H  | 3.91572400  | 4.09422200  | -1.68609100 |
| Si | -2.48335500 | 0.04550800  | -0.84289200 |
| H  | -2.54241600 | 1.42878700  | -1.38810100 |
| H  | -3.50095100 | 0.02593000  | 0.24213600  |
| H  | -0.28194700 | 0.72500900  | -0.50455700 |
| C  | -3.11994000 | -1.09175500 | -2.24097900 |
| H  | -4.11831000 | -0.78390800 | -2.56366100 |
| H  | -2.46051100 | -1.05902000 | -3.11240300 |
| H  | -3.18261300 | -2.13078300 | -1.90822500 |
| O  | 1.93626300  | 7.44236500  | 3.27383500  |
| C  | 1.75822200  | 8.27106900  | 2.14484000  |
| H  | 0.98872100  | 7.87726600  | 1.47023300  |
| H  | 1.43798500  | 9.23913800  | 2.52632200  |
| H  | 2.69183500  | 8.39511200  | 1.58334800  |
| H  | 2.43868800  | 6.22523100  | 0.90690400  |

Imaginary Frequency:-422.37

### VIIIc

0 2

|    |             |             |             |
|----|-------------|-------------|-------------|
| Fe | -0.39289400 | -0.31356100 | 0.54001000  |
| N  | -0.12546600 | 0.31603800  | 2.31336500  |
| C  | 0.55077800  | 1.55315600  | 2.71531400  |
| C  | -0.56289500 | -0.26631300 | 3.40200100  |
| C  | 0.03551600  | 1.77239200  | 4.12176100  |
| H  | 1.63771100  | 1.39791400  | 2.68696100  |
| H  | 0.77708700  | 2.13652200  | 4.83282300  |
| N  | -1.08822300 | -2.06665000 | 1.15079600  |
| C  | -1.44237500 | -2.41495800 | 2.41736300  |
| C  | -2.13405800 | -4.08537200 | 0.29665100  |
| C  | -2.10923700 | -3.65736700 | 2.67554300  |
| C  | -2.44174200 | -4.48247500 | 1.56358200  |
| H  | -2.40781800 | -4.69643500 | -0.55586400 |
| H  | -2.95911000 | -5.41895300 | 1.74672000  |
| C  | -1.18531800 | -1.55142600 | 3.53424100  |
| C  | -2.44722400 | -4.02363300 | 3.98439000  |

|   |             |             |             |
|---|-------------|-------------|-------------|
| C | -2.16712000 | -3.18660900 | 5.05523800  |
| H | -2.43721900 | -3.47644800 | 6.06441400  |
| C | -1.55752400 | -1.96550400 | 4.82673600  |
| H | -1.35545000 | -1.29496600 | 5.65238200  |
| H | -2.95332400 | -4.97195000 | 4.14023800  |
| O | -0.37635700 | 0.45043900  | 4.53784200  |
| C | -1.43603600 | -2.87563500 | 0.08918000  |
| C | -1.01849800 | -2.41887900 | -1.18721800 |
| C | 0.40397600  | -0.86498300 | -2.30411500 |
| C | 1.25778000  | -1.80287000 | -2.91434100 |
| C | 0.43966900  | 0.45990400  | -2.76160300 |
| C | 2.08391400  | -1.43767500 | -3.96645300 |
| C | 1.26471400  | 0.81362700  | -3.82117000 |
| C | 2.08764600  | -0.12670700 | -4.43471300 |
| H | 2.73866800  | -2.17886100 | -4.41403800 |
| H | 1.26034500  | 1.84003800  | -4.17483500 |
| H | 2.73143700  | 0.16065500  | -5.25891100 |
| H | 1.28322800  | -2.81793900 | -2.52998000 |
| H | -0.18299600 | 1.20666100  | -2.28129000 |
| H | 0.31201100  | 2.36527800  | 2.02929000  |
| H | -0.84447900 | 2.42758700  | 4.14693100  |
| N | -0.39325000 | -1.23164200 | -1.20707200 |
| C | -1.36799400 | -3.19044100 | -2.42331300 |
| H | -2.42522600 | -3.47023000 | -2.40285200 |
| H | -1.19818500 | -2.59706700 | -3.32105400 |
| H | -0.79612700 | -4.11861800 | -2.52740900 |
| C | 3.67568700  | 0.33686600  | -0.74795200 |
| H | 4.54526400  | -1.55473800 | -0.32130100 |
| C | 3.93852100  | -0.81871200 | 0.22535700  |
| C | 4.74839000  | -0.36921400 | 1.43689600  |
| C | 2.65606200  | -1.51416300 | 0.66520700  |
| H | 2.86457900  | -2.40680400 | 1.26257100  |
| H | 4.63971200  | 0.80480900  | -0.99362400 |
| H | 2.04362100  | -0.85442300 | 1.29311400  |
| H | 4.99176800  | -1.21320200 | 2.08841700  |
| H | 5.68909700  | 0.10453100  | 1.14127000  |
| H | 4.19370600  | 0.35326100  | 2.04607500  |
| H | 2.04597800  | -1.82346800 | -0.18933700 |
| C | 2.71841800  | 1.41637100  | -0.25353800 |
| H | 2.90138600  | 1.64275600  | 0.80301100  |
| H | 1.67816200  | 1.05491100  | -0.30306100 |
| C | 2.84080600  | 2.69923900  | -1.07850900 |
| H | 3.81765100  | 3.15748000  | -0.86348400 |
| H | 2.86924600  | 2.43784900  | -2.14235700 |
| C | 1.74193000  | 3.70845000  | -0.86716400 |
| C | 1.02555800  | 4.15356300  | -1.90792600 |
| C | 1.48134300  | 4.18433400  | 0.50789500  |
| C | 2.48715000  | 4.19379100  | 1.47809800  |
| C | 0.19737400  | 4.61558400  | 0.88281600  |
| C | 2.21496000  | 4.62343100  | 2.77412900  |
| H | 3.49216000  | 3.87543100  | 1.22177100  |

|    |             |             |             |
|----|-------------|-------------|-------------|
| C  | -0.06430100 | 5.03553800  | 2.18210100  |
| C  | 0.94893300  | 5.04615100  | 3.16053500  |
| H  | 3.01156400  | 4.63131300  | 3.51414100  |
| C  | 0.64065400  | 5.50093500  | 4.55007900  |
| H  | 1.51358100  | 5.40796300  | 5.19881400  |
| H  | 0.31469300  | 6.54555500  | 4.56355900  |
| H  | -0.18149200 | 4.92856700  | 4.99084100  |
| H  | 0.24801600  | 4.90177200  | -1.80117400 |
| H  | 1.21390400  | 3.79155200  | -2.91284400 |
| Si | -1.85711000 | 1.47717300  | -0.17596600 |
| H  | -1.34295700 | 2.63497900  | -0.95969600 |
| H  | -2.48443900 | 2.10819000  | 1.02593500  |
| H  | 3.28941500  | -0.06219400 | -1.69533200 |
| C  | -3.27476700 | 0.71719400  | -1.22534800 |
| H  | -2.88331000 | 0.35264100  | -2.17931100 |
| H  | -3.72132700 | -0.13803500 | -0.71138700 |
| H  | -4.07214000 | 1.43389600  | -1.43975400 |
| O  | -1.28956700 | 5.42865400  | 2.62404300  |
| C  | -2.35161500 | 5.42760100  | 1.68583000  |
| H  | -2.53918100 | 4.42217800  | 1.29191800  |
| H  | -3.23016500 | 5.77462000  | 2.22692000  |
| H  | -2.14795300 | 6.10925500  | 0.85181100  |
| H  | -0.60349600 | 4.56288000  | 0.15628300  |

### TS<sub>1a</sub>

0 2

|    |             |             |             |
|----|-------------|-------------|-------------|
| Fe | -0.24219700 | 0.14567100  | -0.11030200 |
| N  | -0.06379200 | -0.12013400 | 1.81202800  |
| C  | 1.15293100  | -0.06671400 | 2.62301000  |
| C  | -1.08717100 | -0.10768400 | 2.62997700  |
| C  | 0.64394600  | 0.24442900  | 4.02770800  |
| H  | 1.67231800  | -1.02937800 | 2.56014300  |
| H  | 1.03827600  | -0.40912300 | 4.80697300  |
| N  | -2.01572900 | -0.61978500 | -0.05460900 |
| C  | -2.89366600 | -0.59289000 | 0.97803100  |
| C  | -3.72587400 | -1.58164700 | -1.48051200 |
| C  | -4.27225600 | -0.93945000 | 0.78276300  |
| C  | -4.65994800 | -1.41582500 | -0.50475100 |
| H  | -4.00807700 | -1.98222100 | -2.44729700 |
| H  | -5.70040000 | -1.67322100 | -0.67482000 |
| C  | -2.47104600 | -0.24082700 | 2.30100200  |
| C  | -5.17695600 | -0.81347700 | 1.83925100  |
| C  | -4.76188000 | -0.39386000 | 3.09950100  |
| H  | -5.48001100 | -0.29844500 | 3.90636600  |
| C  | -3.42504300 | -0.13363100 | 3.33149600  |
| H  | -3.08124300 | 0.13830800  | 4.32163900  |
| H  | -6.21880200 | -1.06226100 | 1.65858000  |
| O  | -0.77675100 | 0.02530300  | 3.94387000  |
| C  | -2.38048700 | -1.20299600 | -1.25473600 |
| C  | -1.32014200 | -1.37402000 | -2.16722100 |
| C  | 1.04018800  | -1.11166700 | -2.50885900 |

|   |             |             |             |
|---|-------------|-------------|-------------|
| C | 2.16378300  | -1.70218200 | -1.91876900 |
| C | 1.12818300  | -0.68033400 | -3.83797800 |
| C | 3.32679500  | -1.89779700 | -2.65168000 |
| C | 2.29799300  | -0.86523300 | -4.56301800 |
| C | 3.39817600  | -1.48636300 | -3.97932900 |
| H | 4.18244500  | -2.37457100 | -2.18330500 |
| H | 2.35729200  | -0.50472500 | -5.58581000 |
| H | 4.30897600  | -1.63256500 | -4.55067900 |
| H | 2.09151100  | -2.01209200 | -0.88048500 |
| H | 0.28144300  | -0.17216900 | -4.28808600 |
| H | 1.83432500  | 0.69453200  | 2.23462100  |
| H | 0.80993800  | 1.28587900  | 4.32237900  |
| N | -0.11722500 | -0.95139800 | -1.71837700 |
| C | -1.52685700 | -2.06974800 | -3.47624100 |
| H | -0.62885700 | -2.60852400 | -3.78268200 |
| H | -2.34006900 | -2.79346000 | -3.40649000 |
| H | -1.77706900 | -1.38106400 | -4.29117200 |
| C | -0.69971100 | 1.97869400  | -0.68150200 |
| H | 1.23663000  | 0.58418400  | -0.16524900 |
| C | 0.73430900  | 1.97567100  | -0.57980000 |
| C | 1.54023700  | 2.06026000  | -1.84905500 |
| C | 2.86024600  | 1.59774300  | -1.88027900 |
| C | 1.04128700  | 2.69578300  | -2.98615000 |
| C | 3.65448300  | 1.74560900  | -3.00575200 |
| H | 3.26154800  | 1.08151000  | -1.01141500 |
| C | 1.81795700  | 2.84559400  | -4.13157300 |
| H | 0.03040700  | 3.09015800  | -2.97685200 |
| C | 3.11252000  | 2.36200500  | -4.12215400 |
| H | 4.66784700  | 1.36321300  | -3.04412500 |
| H | 1.43261900  | 3.32980100  | -5.02163100 |
| C | 1.39074500  | 2.81791100  | 0.52629100  |
| H | 2.30770200  | 2.31810400  | 0.86447200  |
| C | 0.52170300  | 3.19129500  | 1.71483900  |
| H | 1.12330300  | 3.65310200  | 2.50229400  |
| H | -0.24925900 | 3.91283400  | 1.43455900  |
| H | 0.00862200  | 2.32990700  | 2.14562100  |
| H | -1.30214600 | 2.46972200  | 0.07867500  |
| H | -1.17344200 | 1.91513000  | -1.65829100 |
| H | 1.74132400  | 3.74119000  | 0.04726100  |
| F | 3.86446200  | 2.47030600  | -5.23624400 |

Imaginary Frequency: -613.87

## IIa

0 2

|    |             |             |            |
|----|-------------|-------------|------------|
| Fe | 0.01356200  | -0.19014900 | 0.12832800 |
| N  | -0.11377900 | -0.18354500 | 2.05023100 |
| C  | 0.99058900  | -0.22763100 | 3.01722100 |
| C  | -1.23016600 | -0.15059000 | 2.73151000 |
| C  | 0.32172400  | 0.19032700  | 4.31399700 |
| H  | 1.39590000  | -1.24587400 | 3.05730700 |
| H  | 0.62345900  | -0.37943200 | 5.19247200 |

|   |             |             |             |
|---|-------------|-------------|-------------|
| N | -1.93809100 | -0.58039200 | -0.08258200 |
| C | -2.90401700 | -0.49455900 | 0.87299800  |
| C | -3.63856500 | -1.00900100 | -1.76308000 |
| C | -4.28871900 | -0.65379500 | 0.53644600  |
| C | -4.62129900 | -0.92220600 | -0.82016000 |
| H | -3.88647000 | -1.19587100 | -2.80151400 |
| H | -5.66598700 | -1.04701500 | -1.08670500 |
| C | -2.57945600 | -0.24509100 | 2.24794000  |
| C | -5.27977800 | -0.53831300 | 1.52092300  |
| C | -4.94688500 | -0.27593500 | 2.84100800  |
| H | -5.71982600 | -0.18286400 | 3.59546700  |
| C | -3.61550500 | -0.13625900 | 3.19411200  |
| H | -3.34465400 | 0.05742500  | 4.22407800  |
| H | -6.31787400 | -0.65306100 | 1.22287900  |
| O | -1.07603200 | -0.06388200 | 4.07696400  |
| C | -2.29221900 | -0.82704900 | -1.39141800 |
| C | -1.21212000 | -0.85075400 | -2.32240100 |
| C | 1.12370400  | -0.46692300 | -2.64233300 |
| C | 2.26102600  | -1.21552100 | -2.32650400 |
| C | 1.18063800  | 0.43760400  | -3.70716100 |
| C | 3.42246400  | -1.07705300 | -3.07249900 |
| C | 2.34993300  | 0.58028200  | -4.44459500 |
| C | 3.47403700  | -0.17793000 | -4.13475600 |
| H | 4.29650100  | -1.66785000 | -2.81790000 |
| H | 2.38398000  | 1.29496900  | -5.26082100 |
| H | 4.38624700  | -0.06320200 | -4.71020200 |
| H | 2.21994200  | -1.89181100 | -1.47758000 |
| H | 0.31052700  | 1.04789300  | -3.93046100 |
| H | 1.80127500  | 0.44044700  | 2.72076000  |
| H | 0.44095000  | 1.26009700  | 4.52222800  |
| N | -0.01466400 | -0.56396200 | -1.81545900 |
| C | -1.44189700 | -1.21322200 | -3.75600900 |
| H | -0.52016300 | -1.55197300 | -4.22859700 |
| H | -2.18183500 | -2.01103500 | -3.84322300 |
| H | -1.81262300 | -0.36515900 | -4.34270200 |
| C | 1.68397500  | 0.92618400  | 0.08902800  |
| H | 0.87970000  | 2.16722400  | 1.67627000  |
| C | 1.54561900  | 2.27664000  | 0.80350900  |
| C | 2.86143300  | 2.80331100  | 1.33598600  |
| C | 2.96870500  | 3.28494800  | 2.64210600  |
| C | 4.00552800  | 2.83651100  | 0.53130500  |
| C | 4.16866600  | 3.78153200  | 3.14356000  |
| H | 2.08834300  | 3.27723200  | 3.28162900  |
| C | 5.21163500  | 3.33283900  | 1.00757200  |
| H | 3.94965900  | 2.45555900  | -0.48494800 |
| C | 5.27371700  | 3.79731400  | 2.31196600  |
| H | 4.25650500  | 4.15309600  | 4.15819000  |
| H | 6.10166500  | 3.36161900  | 0.38913300  |
| C | 0.88520500  | 3.32806900  | -0.10285900 |
| H | 0.84099600  | 4.28150500  | 0.43852800  |
| C | -0.50577400 | 2.94365100  | -0.57861800 |

|   |             |            |             |
|---|-------------|------------|-------------|
| H | -0.99935600 | 3.77451100 | -1.09040100 |
| H | -0.47705300 | 2.09798800 | -1.27221400 |
| H | -1.14748700 | 2.65092900 | 0.26222400  |
| H | 2.06768500  | 1.09016700 | -0.92546100 |
| H | 2.43167700  | 0.29441800 | 0.59683700  |
| H | 1.53916500  | 3.50544600 | -0.96818100 |
| F | 6.44440500  | 4.27357800 | 2.78340400  |

### IIIa

0 2

|    |             |             |             |
|----|-------------|-------------|-------------|
| Fe | 0.16445700  | 0.52586700  | 0.08004500  |
| N  | 0.27813900  | 0.45084600  | 1.99583200  |
| C  | 1.49385800  | 0.35834600  | 2.81013700  |
| C  | -0.74465800 | 0.45252200  | 2.81228100  |
| C  | 0.96297200  | -0.08371100 | 4.16264700  |
| H  | 2.19805800  | -0.35159900 | 2.37200500  |
| H  | 1.01995000  | -1.17055900 | 4.29943500  |
| N  | -1.77909000 | 0.99573400  | 0.12159900  |
| C  | -2.62204400 | 0.89945700  | 1.18564900  |
| C  | -3.66917600 | 1.41667300  | -1.34169600 |
| C  | -4.03701600 | 1.05515600  | 1.01783900  |
| C  | -4.53061900 | 1.32332300  | -0.28780000 |
| H  | -4.04228100 | 1.59416300  | -2.34371000 |
| H  | -5.60129300 | 1.43072700  | -0.42885800 |
| C  | -2.13594400 | 0.62063300  | 2.50675400  |
| C  | -4.90488400 | 0.92154600  | 2.11146900  |
| C  | -4.41609500 | 0.64605400  | 3.37927600  |
| H  | -5.09334900 | 0.54205600  | 4.21958600  |
| C  | -3.05189600 | 0.50059000  | 3.56872800  |
| H  | -2.66116700 | 0.28469400  | 4.55496100  |
| H  | -5.97162900 | 1.03020200  | 1.93898200  |
| O  | -0.42608900 | 0.28814100  | 4.12412400  |
| C  | -2.28684700 | 1.24352500  | -1.13330200 |
| C  | -1.33034500 | 1.25680000  | -2.19150000 |
| C  | 0.94585500  | 0.81539100  | -2.78835800 |
| C  | 0.81454600  | 0.02303700  | -3.93504100 |
| C  | 2.18285400  | 1.41300600  | -2.52205300 |
| C  | 1.88954100  | -0.14908300 | -4.79940100 |
| C  | 3.24833500  | 1.24786400  | -3.39334800 |
| C  | 3.10856600  | 0.46597000  | -4.53803200 |
| H  | 1.77386500  | -0.77620900 | -5.67777000 |
| H  | 4.19840200  | 1.72459600  | -3.17425100 |
| H  | 3.94648500  | 0.32892800  | -5.21286900 |
| H  | -0.12859400 | -0.47932200 | -4.12853000 |
| H  | 2.29095000  | 1.99670000  | -1.61203600 |
| H  | 1.98703800  | 1.33749300  | 2.84659200  |
| H  | 1.42129600  | 0.40771000  | 5.02065300  |
| N  | -0.08474300 | 0.94067200  | -1.83944800 |
| C  | -1.74046600 | 1.64623700  | -3.57705600 |
| H  | -0.88384400 | 1.96623000  | -4.16967000 |
| H  | -2.21722800 | 0.81851000  | -4.11575300 |

|   |             |             |             |
|---|-------------|-------------|-------------|
| H | -2.46091300 | 2.46624600  | -3.55139200 |
| C | 1.56099200  | -0.89881000 | -0.22402400 |
| H | 1.77900600  | -1.05440900 | -1.28887100 |
| H | 2.51988800  | -0.64762400 | 0.25398900  |
| C | 0.97179400  | -2.18337900 | 0.37656000  |
| H | 1.02842400  | -2.12467000 | 1.47602200  |
| C | 1.73884800  | -3.44429900 | -0.05053700 |
| H | 1.68063200  | -3.53322200 | -1.14372800 |
| H | 2.80142900  | -3.29173400 | 0.17589200  |
| C | 1.23887700  | -4.72045400 | 0.60438100  |
| H | 1.82624100  | -5.59124300 | 0.30223500  |
| H | 1.29115100  | -4.65239500 | 1.69648700  |
| H | 0.19504400  | -4.91985700 | 0.34418300  |
| C | -0.50376000 | -2.27944400 | 0.03087100  |
| C | -1.48539200 | -2.41186700 | 1.01294000  |
| C | -0.92044000 | -2.16576000 | -1.30188800 |
| C | -2.84167700 | -2.40559900 | 0.69553700  |
| H | -1.18464700 | -2.49599200 | 2.05567800  |
| C | -2.26518200 | -2.15618000 | -1.64253600 |
| H | -0.17160200 | -2.04706800 | -2.08139200 |
| C | -3.20815100 | -2.26719900 | -0.63042100 |
| H | -3.60771900 | -2.47984400 | 1.45953900  |
| H | -2.59559800 | -2.04728000 | -2.67062900 |
| F | -4.51789000 | -2.22962800 | -0.95116500 |

**TS<sub>2a</sub>**

0 2

|    |             |             |             |
|----|-------------|-------------|-------------|
| Fe | 0.06807700  | 0.13460100  | -0.06893300 |
| N  | 0.14366300  | 0.12279200  | 1.86830900  |
| C  | 1.37188700  | 0.20658100  | 2.66428100  |
| C  | -0.85692700 | 0.27239900  | 2.68684500  |
| C  | 0.87261800  | -0.00224400 | 4.08205200  |
| H  | 2.09810400  | -0.54381100 | 2.34828100  |
| H  | 0.95416800  | -1.04704500 | 4.40587900  |
| N  | -1.87221800 | 0.49213800  | -0.05043700 |
| C  | -2.72226500 | 0.52228100  | 1.01922600  |
| C  | -3.76869900 | 0.81376100  | -1.54265300 |
| C  | -4.13629100 | 0.66807900  | 0.83443700  |
| C  | -4.63215000 | 0.81780300  | -0.48894900 |
| H  | -4.13498700 | 0.91360800  | -2.55766900 |
| H  | -5.70170800 | 0.92455500  | -0.63798500 |
| C  | -2.25064300 | 0.39710200  | 2.36503400  |
| C  | -5.00626000 | 0.65854000  | 1.93479000  |
| C  | -4.52749800 | 0.52404400  | 3.22735300  |
| H  | -5.20813000 | 0.51954800  | 4.07110000  |
| C  | -3.16298400 | 0.40238000  | 3.43339400  |
| H  | -2.77004300 | 0.30616300  | 4.43760900  |
| H  | -6.07082000 | 0.76294200  | 1.74605000  |
| O  | -0.52609100 | 0.33092000  | 4.00271100  |
| C  | -2.38791700 | 0.63745300  | -1.32325800 |
| C  | -1.44324300 | 0.55234000  | -2.37934500 |



|    |             |             |             |
|----|-------------|-------------|-------------|
| C  | 0.80957700  | 0.05947800  | -2.95741600 |
| C  | 0.65709100  | -0.91344200 | -3.95406900 |
| C  | 2.01630500  | 0.76406000  | -2.88944900 |
| C  | 1.68482600  | -1.17831600 | -4.85051300 |
| C  | 3.03539800  | 0.50277000  | -3.79477900 |
| C  | 2.88041700  | -0.47197400 | -4.77622500 |
| H  | 1.54944800  | -1.94348900 | -5.60837500 |
| H  | 3.96081400  | 1.06621000  | -3.73068300 |
| H  | 3.68314100  | -0.67856300 | -5.47576500 |
| H  | -0.27481100 | -1.46840900 | -4.01181300 |
| H  | 2.14578900  | 1.52163600  | -2.12487700 |
| H  | 1.83130500  | 1.19328400  | 2.51352400  |
| H  | 1.33110000  | 0.64062600  | 4.83315700  |
| N  | -0.19964100 | 0.26600000  | -1.99101200 |
| C  | -1.84352200 | 0.83221900  | -3.79461100 |
| H  | -0.98156800 | 1.10441600  | -4.40343500 |
| H  | -2.32043200 | -0.03020600 | -4.27658400 |
| H  | -2.55703700 | 1.65770000  | -3.83959400 |
| C  | 1.60787500  | -1.20852900 | -0.18238000 |
| H  | 1.79538500  | -1.42798300 | -1.23972800 |
| H  | 2.59623000  | -1.03820600 | 0.26369800  |
| C  | 0.97262400  | -2.43230200 | 0.50470900  |
| H  | 1.03555900  | -2.29898200 | 1.59464800  |
| C  | 1.74535000  | -3.71580700 | 0.15729200  |
| H  | 1.68367400  | -3.88011600 | -0.92661100 |
| H  | 2.80802600  | -3.54743000 | 0.37162000  |
| C  | 1.24839100  | -4.94341900 | 0.90095200  |
| H  | 1.83859500  | -5.83008400 | 0.65725900  |
| H  | 1.30320800  | -4.79974400 | 1.98527600  |
| H  | 0.20524400  | -5.16378100 | 0.65659500  |
| C  | -0.50097000 | -2.56091300 | 0.17119100  |
| C  | -1.47678800 | -2.66453600 | 1.16521400  |
| C  | -0.91675100 | -2.58862700 | -1.16481500 |
| C  | -2.82834000 | -2.74582800 | 0.84912300  |
| H  | -1.17349400 | -2.65429900 | 2.20990100  |
| C  | -2.25967700 | -2.66777000 | -1.50473000 |
| H  | -0.16847000 | -2.52453700 | -1.95005200 |
| C  | -3.19730300 | -2.73015900 | -0.48472000 |
| H  | -3.59329400 | -2.79238200 | 1.61632200  |
| H  | -2.59175800 | -2.66533500 | -2.53771900 |
| Si | 0.62052100  | 2.41510200  | 0.00160800  |
| H  | 1.50454500  | 0.48570700  | -0.16858800 |
| H  | 0.13526000  | 3.05537300  | -1.24495200 |
| C  | -0.25178400 | 3.26639400  | 1.47484800  |
| H  | 0.15055300  | 2.94185600  | 2.43827100  |
| H  | -0.12778500 | 4.35143900  | 1.41803500  |
| H  | -1.32292500 | 3.05112400  | 1.47652700  |
| H  | 2.05426200  | 2.79394600  | 0.10331200  |
| F  | -4.50551600 | -2.77547000 | -0.80289700 |

Imaginary Frequency; -471.31

**IVa**

0 2

|    |             |             |             |
|----|-------------|-------------|-------------|
| Fe | -0.41693200 | 0.92933300  | -0.22121700 |
| N  | -0.68550700 | 0.16069000  | 1.51519200  |
| C  | 0.29048100  | 0.05136700  | 2.60691500  |
| C  | -1.80392900 | -0.37536400 | 1.92909500  |
| C  | -0.56962600 | -0.30661000 | 3.80888900  |
| H  | 1.01525100  | -0.73131000 | 2.35535800  |
| H  | -0.17979900 | -1.11846200 | 4.42289600  |
| N  | -2.08660200 | 0.10116200  | -0.95093300 |
| C  | -3.07369600 | -0.51421200 | -0.24959400 |
| C  | -3.30992800 | -0.26117700 | -3.01272200 |
| C  | -4.24030800 | -1.01911300 | -0.91321900 |
| C  | -4.31812400 | -0.87547900 | -2.32690500 |
| H  | -3.37218800 | -0.13651200 | -4.08762600 |
| H  | -5.19505100 | -1.25459000 | -2.84212100 |
| C  | -2.98574900 | -0.68896600 | 1.17051600  |
| C  | -5.27005600 | -1.62376200 | -0.17977900 |
| C  | -5.18428900 | -1.74886800 | 1.19887900  |
| H  | -5.99081800 | -2.20591000 | 1.76096500  |
| C  | -4.05607400 | -1.28859300 | 1.85801800  |
| H  | -3.97151700 | -1.40054500 | 2.93182200  |
| H  | -6.14438500 | -1.98178800 | -0.71559400 |
| O  | -1.81091500 | -0.75625800 | 3.22717600  |
| C  | -2.18954300 | 0.23412800  | -2.31666400 |
| C  | -1.09105200 | 0.88720000  | -2.95039200 |
| C  | 0.98103300  | 2.03806100  | -2.62423100 |
| C  | 2.25236700  | 1.63065200  | -2.20760900 |
| C  | 0.86460700  | 3.16141900  | -3.44718100 |
| C  | 3.38189300  | 2.32245900  | -2.61876200 |
| C  | 1.99886200  | 3.85731000  | -3.84728100 |
| C  | 3.26119200  | 3.44044900  | -3.44037400 |
| H  | 4.36147300  | 1.99407100  | -2.28695100 |
| H  | 1.89229900  | 4.73897200  | -4.47119300 |
| H  | 4.14405600  | 3.98939100  | -3.74944600 |
| H  | 2.33371300  | 0.77470500  | -1.54247100 |
| H  | -0.12253200 | 3.50712500  | -3.73674100 |
| H  | 0.83985900  | 0.98573500  | 2.73406200  |
| H  | -0.79205500 | 0.55549900  | 4.44654300  |
| N  | -0.14767900 | 1.34896500  | -2.13005800 |
| C  | -1.00434400 | 0.95032100  | -4.44287000 |
| H  | 0.02482600  | 1.09240700  | -4.77197700 |
| H  | -1.37913200 | 0.02701500  | -4.88973600 |
| H  | -1.59373500 | 1.77358400  | -4.86169200 |
| C  | 0.17335500  | -2.24547600 | -2.15543000 |
| H  | -0.91473200 | -2.36139400 | -2.20817700 |
| H  | 0.54391400  | -2.16323900 | -3.18234400 |
| C  | 0.82307100  | -3.41503100 | -1.42492000 |
| H  | 1.91391500  | -3.28222100 | -1.46832100 |
| C  | 0.49522400  | -4.74351200 | -2.12170800 |
| H  | -0.59306500 | -4.89206100 | -2.09938500 |

|    |             |             |             |
|----|-------------|-------------|-------------|
| H  | 0.76046900  | -4.65120700 | -3.18222800 |
| C  | 1.19491100  | -5.94571600 | -1.51423000 |
| H  | 0.97225800  | -6.86249500 | -2.06465600 |
| H  | 2.28211700  | -5.81579500 | -1.51877000 |
| H  | 0.89201600  | -6.10288400 | -0.47510200 |
| C  | 0.44226900  | -3.45192400 | 0.03832700  |
| C  | 1.42147100  | -3.51750300 | 1.03077100  |
| C  | -0.89869400 | -3.46750700 | 0.43686500  |
| C  | 1.08891400  | -3.59375100 | 2.38036200  |
| H  | 2.46914100  | -3.51414300 | 0.74087200  |
| C  | -1.25421100 | -3.54855800 | 1.77693800  |
| H  | -1.68857800 | -3.41191800 | -0.30890900 |
| C  | -0.24984500 | -3.60748300 | 2.72827600  |
| H  | 1.84690900  | -3.64523000 | 3.15411400  |
| H  | -2.29135100 | -3.54707400 | 2.09247100  |
| Si | 0.81190700  | 2.84850200  | 0.62569800  |
| H  | 0.37072600  | -1.29633100 | -1.64790300 |
| H  | 1.10430200  | 3.94366600  | -0.33280200 |
| C  | -0.12331400 | 3.66116300  | 2.10447200  |
| H  | -0.37170600 | 2.93497000  | 2.88409300  |
| H  | 0.46296200  | 4.45837000  | 2.56986100  |
| H  | -1.06647000 | 4.09949300  | 1.76944200  |
| H  | 2.14754600  | 2.45357200  | 1.16884900  |
| F  | -0.58756700 | -3.66259900 | 4.03459500  |

### TS<sub>1b</sub>

0 2

|    |             |             |             |
|----|-------------|-------------|-------------|
| Fe | -0.23549600 | 0.15862300  | -0.10460000 |
| N  | -0.05609500 | -0.14220100 | 1.81028000  |
| C  | 1.16138700  | -0.09591200 | 2.62036700  |
| C  | -1.07853700 | -0.15668300 | 2.63009400  |
| C  | 0.65213400  | 0.18482600  | 4.03115400  |
| H  | 1.68699100  | -1.05387300 | 2.53876300  |
| H  | 1.05608100  | -0.47729700 | 4.79830300  |
| N  | -2.00756100 | -0.61563100 | -0.06327000 |
| C  | -2.88369000 | -0.61897400 | 0.97065500  |
| C  | -3.71537100 | -1.55013700 | -1.51045600 |
| C  | -4.26090500 | -0.96973700 | 0.77002200  |
| C  | -4.64823800 | -1.41567900 | -0.52870800 |
| H  | -3.99787700 | -1.92685300 | -2.48677600 |
| H  | -5.68749800 | -1.67522400 | -0.70318000 |
| C  | -2.46107200 | -0.29475500 | 2.30119300  |
| C  | -5.16393500 | -0.87613000 | 1.83084400  |
| C  | -4.74910700 | -0.48398300 | 3.10059400  |
| H  | -5.46641200 | -0.41333700 | 3.91084500  |
| C  | -3.41431600 | -0.21882700 | 3.33604900  |
| H  | -3.07044300 | 0.03332600  | 4.33140900  |
| H  | -6.20448500 | -1.12770000 | 1.64619500  |
| O  | -0.76575900 | -0.04924500 | 3.94678700  |
| C  | -2.37140600 | -1.17035500 | -1.27786700 |
| C  | -1.31189800 | -1.31283600 | -2.19524700 |

|   |             |             |             |
|---|-------------|-------------|-------------|
| C | 1.04712700  | -1.03462000 | -2.53405600 |
| C | 2.17255800  | -1.63992000 | -1.96269000 |
| C | 1.13128200  | -0.56976500 | -3.85192800 |
| C | 3.33175300  | -1.82081300 | -2.70505800 |
| C | 2.29732200  | -0.73913600 | -4.58615900 |
| C | 3.39792700  | -1.37820500 | -4.02292700 |
| H | 4.18833100  | -2.31041000 | -2.25172900 |
| H | 2.35377200  | -0.34964700 | -5.59858400 |
| H | 4.30471300  | -1.51818100 | -4.60306200 |
| H | 2.10427000  | -1.97387800 | -0.93166300 |
| H | 0.28559700  | -0.04521000 | -4.28442700 |
| H | 1.83694600  | 0.67693600  | 2.24520200  |
| H | 0.80731700  | 1.22309100  | 4.34294400  |
| N | -0.10902600 | -0.89760600 | -1.73749700 |
| C | -1.51758500 | -1.97429300 | -3.52225400 |
| H | -2.33205200 | -2.69828100 | -3.47267700 |
| H | -1.76476900 | -1.26435000 | -4.31974500 |
| H | -0.61968500 | -2.50628700 | -3.84092300 |
| C | -0.70449100 | 2.00061600  | -0.63686200 |
| H | 1.24005200  | 0.60279900  | -0.15224800 |
| C | 0.72918800  | 2.01162100  | -0.54192300 |
| C | 1.52765000  | 2.12199300  | -1.80966400 |
| C | 2.85484400  | 1.68657500  | -1.86050500 |
| C | 1.03172100  | 2.76441100  | -2.94252800 |
| C | 3.64244900  | 1.85464200  | -2.98359100 |
| H | 3.27614600  | 1.17285700  | -0.99848400 |
| C | 1.80166200  | 2.93662600  | -4.08588300 |
| H | 0.01922900  | 3.15723300  | -2.93183000 |
| C | 3.12312500  | 2.46215400  | -4.14349000 |
| H | 4.65685500  | 1.47562200  | -2.97199100 |
| H | 1.36541900  | 3.44495600  | -4.93724900 |
| C | 1.38033600  | 2.82730800  | 0.58602600  |
| H | 2.29962000  | 2.32369700  | 0.91186200  |
| C | 0.51028200  | 3.16953600  | 1.78357000  |
| H | 1.10984800  | 3.61435300  | 2.58255800  |
| H | -0.26302900 | 3.89513300  | 1.52020000  |
| H | -0.00104000 | 2.29703300  | 2.19374200  |
| C | 5.28916700  | 2.26713000  | -5.24844600 |
| H | 5.83906200  | 2.92910400  | -4.56140900 |
| H | 5.46990300  | 1.23526100  | -4.92984500 |
| H | 5.71625500  | 2.38127700  | -6.24455700 |
| H | -1.31047200 | 2.46779600  | 0.13577200  |
| H | -1.17988100 | 1.95395200  | -1.61390000 |
| H | 1.72737900  | 3.76268200  | 0.12858500  |
| N | 3.87525400  | 2.55230700  | -5.30466600 |
| C | 3.39171000  | 3.37395800  | -6.38769500 |
| H | 3.26620400  | 4.43171600  | -6.10822500 |
| H | 4.09572200  | 3.32271300  | -7.21794000 |
| H | 2.42509900  | 3.01244000  | -6.75429800 |

Imaginary Frequency: -597.69

**Иб**

0 2

|    |             |             |             |
|----|-------------|-------------|-------------|
| Fe | 0.02072100  | -0.22351900 | 0.10891800  |
| N  | -0.08104900 | -0.21740300 | 2.03316900  |
| C  | 1.03673500  | -0.27026300 | 2.98470400  |
| C  | -1.18669400 | -0.15517800 | 2.72874600  |
| C  | 0.39275800  | 0.16474200  | 4.28850700  |
| H  | 1.42913300  | -1.29356100 | 3.02452000  |
| H  | 0.69523100  | -0.40769200 | 5.16512200  |
| N  | -1.94430400 | -0.56542400 | -0.07581900 |
| C  | -2.89472800 | -0.45923600 | 0.89303600  |
| C  | -3.67699900 | -0.94705500 | -1.73416500 |
| C  | -4.28732400 | -0.58442500 | 0.57533600  |
| C  | -4.64450600 | -0.83987300 | -0.77766200 |
| H  | -3.94372600 | -1.12385300 | -2.76972900 |
| H  | -5.69549600 | -0.93815800 | -1.03042200 |
| C  | -2.54492200 | -0.22054800 | 2.26379600  |
| C  | -5.26179400 | -0.44884500 | 1.57383800  |
| C  | -4.90417000 | -0.19827800 | 2.88968500  |
| H  | -5.66399600 | -0.08929900 | 3.65534800  |
| C  | -3.56487400 | -0.09018200 | 3.22430000  |
| H  | -3.27508800 | 0.09505100  | 4.25068600  |
| H  | -6.30639900 | -0.53816700 | 1.28999500  |
| O  | -1.01321600 | -0.06312100 | 4.07173400  |
| C  | -2.32152300 | -0.79944000 | -1.38022300 |
| C  | -1.25485600 | -0.84870200 | -2.32563300 |
| C  | 1.08547500  | -0.52382200 | -2.67630700 |
| C  | 2.21248400  | -1.29129600 | -2.36818400 |
| C  | 1.14600700  | 0.36817100  | -3.75167300 |
| C  | 3.36515000  | -1.18529900 | -3.13260900 |
| C  | 2.30683700  | 0.47844200  | -4.50762100 |
| C  | 3.41934200  | -0.29989500 | -4.20626300 |
| H  | 4.23074000  | -1.79071200 | -2.88335900 |
| H  | 2.34373500  | 1.18402700  | -5.33165100 |
| H  | 4.32512300  | -0.21040800 | -4.79622800 |
| H  | 2.17025600  | -1.95627800 | -1.51041100 |
| H  | 0.28598200  | 0.99477900  | -3.96840400 |
| H  | 1.85098400  | 0.38690600  | 2.67320000  |
| H  | 0.53624900  | 1.23256600  | 4.49024700  |
| N  | -0.04341900 | -0.59253200 | -1.83473400 |
| C  | -1.51401500 | -1.20614700 | -3.75569100 |
| H  | -0.60866300 | -1.57122100 | -4.24026400 |
| H  | -2.27691700 | -1.98329700 | -3.83141700 |
| H  | -1.86891800 | -0.34913300 | -4.33926200 |
| C  | 1.70759500  | 0.86179100  | 0.05360900  |
| H  | 0.88537100  | 2.10762700  | 1.62711300  |
| C  | 1.58745600  | 2.20790000  | 0.78129100  |
| C  | 2.89341700  | 2.69053600  | 1.37511900  |
| C  | 2.95397100  | 3.21632000  | 2.66555500  |
| C  | 4.08920900  | 2.65954600  | 0.65341800  |
| C  | 4.13764600  | 3.68185000  | 3.22434500  |

|   |             |            |             |
|---|-------------|------------|-------------|
| H | 2.03809400  | 3.27771400 | 3.25200400  |
| C | 5.28155400  | 3.12341400 | 1.18712100  |
| H | 4.08650000  | 2.25771800 | -0.35711200 |
| C | 5.34055400  | 3.63409200 | 2.49833000  |
| H | 4.12108000  | 4.08440500 | 4.22987900  |
| H | 6.17678600  | 3.08352500 | 0.57843100  |
| C | 0.98255900  | 3.28369600 | -0.13494000 |
| H | 0.94014000  | 4.23135900 | 0.41667500  |
| C | -0.39957800 | 2.93356400 | -0.66139700 |
| H | -0.85841900 | 3.77722900 | -1.18489900 |
| H | -0.36555000 | 2.09013200 | -1.35759200 |
| H | -1.07533000 | 2.64944900 | 0.15582100  |
| C | 6.50056300  | 4.82697000 | 4.27677400  |
| H | 5.92711400  | 5.76326600 | 4.18265400  |
| H | 6.05669500  | 4.24784500 | 5.09228900  |
| H | 7.51830000  | 5.07908900 | 4.57465900  |
| H | 2.08568800  | 1.02573100 | -0.96328000 |
| H | 2.44818300  | 0.21473800 | 0.55228300  |
| H | 1.66993000  | 3.45648600 | -0.97487900 |
| N | 6.54211700  | 4.05676700 | 3.05660500  |
| C | 7.67281800  | 4.26646900 | 2.18327300  |
| H | 7.96652500  | 3.33559800 | 1.68904800  |
| H | 7.48421100  | 5.01590400 | 1.39798500  |
| H | 8.52383200  | 4.60119400 | 2.77642500  |

### IIIb

0 2

|    |             |             |             |
|----|-------------|-------------|-------------|
| Fe | 0.24348000  | -0.10919300 | -0.12771600 |
| N  | 0.10377200  | -0.03480400 | 1.80305600  |
| C  | 1.16649700  | 0.25808200  | 2.76980200  |
| C  | -1.01539400 | -0.14892700 | 2.47800100  |
| C  | 0.53912200  | -0.13905400 | 4.09192700  |
| H  | 2.07140300  | -0.30400900 | 2.53758600  |
| H  | 0.78516000  | -1.16983800 | 4.37716300  |
| N  | -1.74965000 | -0.05250800 | -0.35542200 |
| C  | -2.68810000 | -0.29274900 | 0.59519600  |
| C  | -3.45572200 | -0.18194200 | -2.07655200 |
| C  | -4.06146200 | -0.50844300 | 0.23914200  |
| C  | -4.40999000 | -0.44774200 | -1.13751200 |
| H  | -3.71454100 | -0.14420600 | -3.12872400 |
| H  | -5.44423500 | -0.61932300 | -1.42242800 |
| C  | -2.34540200 | -0.34818300 | 1.98994600  |
| C  | -5.02228400 | -0.77433400 | 1.22470100  |
| C  | -4.66995600 | -0.82708400 | 2.56798800  |
| H  | -5.41906000 | -1.03165300 | 3.32494900  |
| C  | -3.35527100 | -0.61214100 | 2.93822800  |
| H  | -3.07269200 | -0.64899500 | 3.98258400  |
| H  | -6.05071000 | -0.93530800 | 0.91275500  |
| O  | -0.87341300 | -0.07249000 | 3.82961400  |
| C  | -2.11625100 | 0.00098900  | -1.68163000 |
| C  | -1.05270600 | 0.20408700  | -2.61177300 |

|   |             |             |             |
|---|-------------|-------------|-------------|
| C | 1.31895800  | 0.35500500  | -2.88845800 |
| C | 1.57547600  | -0.49819200 | -3.96786600 |
| C | 2.28779300  | 1.29858200  | -2.52939600 |
| C | 2.76585800  | -0.39564400 | -4.67824100 |
| C | 3.46810600  | 1.40465100  | -3.24894200 |
| C | 3.71458700  | 0.55852700  | -4.32773800 |
| H | 2.95468900  | -1.07222200 | -5.50579100 |
| H | 4.20666500  | 2.14560700  | -2.96020200 |
| H | 4.64326400  | 0.63563200  | -4.88273800 |
| H | 0.84548000  | -1.25945900 | -4.22697700 |
| H | 2.09939300  | 1.93278300  | -1.66811100 |
| H | 1.41886700  | 1.32516300  | 2.72504600  |
| H | 0.75986000  | 0.52450000  | 4.92792600  |
| N | 0.16842000  | 0.22739000  | -2.08878900 |
| C | -1.34597300 | 0.41420800  | -4.06476000 |
| H | -0.52145700 | 0.92097800  | -4.56574500 |
| H | -1.51247400 | -0.53208500 | -4.59379800 |
| H | -2.24565400 | 1.01810000  | -4.19722900 |
| C | 2.12130100  | -0.89320900 | -0.04134300 |
| H | 2.53985000  | -0.97864800 | -1.05416200 |
| H | 2.86258800  | -0.34466100 | 0.55481100  |
| C | 1.86320200  | -2.29817100 | 0.52435800  |
| H | 1.76721500  | -2.23219600 | 1.62058300  |
| C | 2.99373000  | -3.29233000 | 0.22588000  |
| H | 3.09670400  | -3.38688700 | -0.86374600 |
| H | 3.93870400  | -2.85552100 | 0.57280900  |
| C | 2.78514600  | -4.66160700 | 0.84984100  |
| H | 3.61572700  | -5.34003500 | 0.63780300  |
| H | 2.68948400  | -4.59014900 | 1.93882700  |
| H | 1.86997300  | -5.13178100 | 0.47729500  |
| C | 0.51608700  | -2.78608100 | 0.01644000  |
| C | -0.53339800 | -3.12719900 | 0.87400800  |
| C | 0.24995100  | -2.84731500 | -1.35742500 |
| C | -1.79542500 | -3.45963200 | 0.40549700  |
| H | -0.36254500 | -3.10279200 | 1.94933500  |
| C | -1.00229700 | -3.17569900 | -1.85182500 |
| H | 1.04422900  | -2.59990100 | -2.05921300 |
| C | -2.07134000 | -3.45733900 | -0.97597400 |
| H | -2.58055500 | -3.68114900 | 1.11912200  |
| H | -1.15677100 | -3.19332800 | -2.92514200 |
| C | -3.58605100 | -3.71141600 | -2.87051900 |
| H | -3.04880000 | -4.51720500 | -3.39246600 |
| H | -4.65238500 | -3.84442000 | -3.05157200 |
| H | -3.28637700 | -2.76058900 | -3.33149800 |
| N | -3.34260300 | -3.70245200 | -1.45221900 |
| C | -4.39327900 | -4.08772700 | -0.54229700 |
| H | -5.31932000 | -4.21907400 | -1.10157100 |
| H | -4.17423100 | -5.03182800 | -0.02333000 |
| H | -4.56959600 | -3.31969700 | 0.22155400  |

0 2

|    |             |             |             |
|----|-------------|-------------|-------------|
| Fe | 0.23044500  | -0.28061100 | -0.21039100 |
| N  | 0.09292200  | -0.21482200 | 1.72197100  |
| C  | 1.19269100  | 0.11348500  | 2.63353700  |
| C  | -1.00174000 | -0.21886500 | 2.42563500  |
| C  | 0.58735700  | -0.14455400 | 4.00051200  |
| H  | 2.07136200  | -0.49929400 | 2.42779900  |
| H  | 0.81179700  | -1.15151800 | 4.37351500  |
| N  | -1.73985400 | -0.25606900 | -0.40578900 |
| C  | -2.69159100 | -0.34677700 | 0.56794200  |
| C  | -3.48843600 | -0.30954800 | -2.09660600 |
| C  | -4.08260100 | -0.45436100 | 0.23490700  |
| C  | -4.44964500 | -0.43441100 | -1.13792500 |
| H  | -3.75494600 | -0.29362600 | -3.14734000 |
| H  | -5.50030900 | -0.51867500 | -1.40051700 |
| C  | -2.35295700 | -0.34852400 | 1.96010100  |
| C  | -5.05197100 | -0.57977000 | 1.24153800  |
| C  | -4.69825400 | -0.59297400 | 2.58161100  |
| H  | -5.45505100 | -0.68816800 | 3.35213300  |
| C  | -3.36291100 | -0.47136400 | 2.92917100  |
| H  | -3.06902100 | -0.47011600 | 3.97116100  |
| H  | -6.09343200 | -0.66176700 | 0.94163700  |
| O  | -0.83048900 | -0.06190600 | 3.76541100  |
| C  | -2.13023700 | -0.23869700 | -1.72967700 |
| C  | -1.07627400 | -0.19163100 | -2.68175500 |
| C  | 1.27424700  | -0.30349200 | -3.01398200 |
| C  | 1.40192700  | -1.31923900 | -3.97030700 |
| C  | 2.32297900  | 0.61056100  | -2.86494400 |
| C  | 2.54789800  | -1.42047000 | -4.74921600 |
| C  | 3.46050800  | 0.51121900  | -3.65383200 |
| C  | 3.58412600  | -0.50578300 | -4.59607400 |
| H  | 2.63093100  | -2.22181600 | -5.47672600 |
| H  | 4.25931600  | 1.23527400  | -3.52855200 |
| H  | 4.47915700  | -0.58494900 | -5.20364900 |
| H  | 0.59552400  | -2.03735700 | -4.08735600 |
| H  | 2.23621400  | 1.40230900  | -2.12943100 |
| H  | 1.48151500  | 1.16369400  | 2.48521200  |
| H  | 0.84639000  | 0.58596800  | 4.76672400  |
| N  | 0.14892100  | -0.24901600 | -2.16339500 |
| C  | -1.37057800 | -0.03793400 | -4.14191900 |
| H  | -0.50449100 | 0.34132400  | -4.68366400 |
| H  | -1.65708200 | -0.98651700 | -4.61386300 |
| H  | -2.19517300 | 0.66045900  | -4.30065200 |
| C  | 1.99966500  | -1.30135600 | -0.10021900 |
| H  | 2.33960200  | -1.50889400 | -1.12156400 |
| H  | 2.87724400  | -0.91717900 | 0.43518900  |
| C  | 1.52548100  | -2.59952700 | 0.57262700  |
| H  | 1.45502000  | -2.43149100 | 1.65800500  |
| C  | 2.53282600  | -3.74009000 | 0.35366600  |
| H  | 2.61023000  | -3.93672100 | -0.72397500 |
| H  | 3.52630500  | -3.39173800 | 0.66357100  |



|    |             |             |             |
|----|-------------|-------------|-------------|
| C  | 2.17003900  | -5.01712300 | 1.09161700  |
| H  | 2.91507400  | -5.80143500 | 0.93607800  |
| H  | 2.09480500  | -4.84403300 | 2.17055400  |
| H  | 1.20357700  | -5.40726400 | 0.75944000  |
| C  | 0.13219400  | -2.97589800 | 0.10729300  |
| C  | -0.91465500 | -3.22532500 | 0.99857600  |
| C  | -0.14730900 | -3.12983400 | -1.25512900 |
| C  | -2.19228800 | -3.53844300 | 0.56469200  |
| H  | -0.72809600 | -3.14280700 | 2.06813200  |
| C  | -1.41422200 | -3.44137000 | -1.71604300 |
| H  | 0.65487700  | -2.98170400 | -1.97394400 |
| C  | -2.48367900 | -3.61505700 | -0.81223500 |
| H  | -2.97752100 | -3.68213500 | 1.29778300  |
| H  | -1.58108900 | -3.53166700 | -2.78357600 |
| C  | -4.03776800 | -3.87740000 | -2.67349100 |
| H  | -3.54554000 | -4.72152300 | -3.17720000 |
| H  | -5.11155300 | -3.97226000 | -2.83167800 |
| H  | -3.70561200 | -2.95486000 | -3.16917100 |
| Si | 0.34560600  | 2.06377200  | -0.19993000 |
| H  | 1.55210600  | 0.38578000  | -0.18611000 |
| H  | -0.12667700 | 2.55370700  | -1.51766000 |
| C  | -0.80730300 | 2.78649000  | 1.14310300  |
| H  | -0.44779200 | 2.57670600  | 2.15402000  |
| H  | -0.87818500 | 3.87294600  | 1.04024700  |
| H  | -1.81562900 | 2.37437300  | 1.06048600  |
| H  | 1.66327800  | 2.72016300  | 0.00697300  |
| N  | -3.76683600 | -3.84011600 | -1.25963000 |
| C  | -4.83362400 | -4.06692300 | -0.31547500 |
| H  | -4.95676200 | -3.22008100 | 0.37230400  |
| H  | -5.76934700 | -4.19767300 | -0.85802700 |
| H  | -4.66720800 | -4.96768100 | 0.29115500  |

Imaginary Frequency; -328.69

#### IVb

0 2

|    |             |             |             |
|----|-------------|-------------|-------------|
| Fe | -0.08106900 | 0.08783200  | -0.07542000 |
| N  | -0.00398500 | -0.11329700 | 1.82132900  |
| C  | 1.19459800  | -0.08490500 | 2.66665700  |
| C  | -1.03655000 | -0.31798300 | 2.59194200  |
| C  | 0.63020100  | -0.02200200 | 4.08039500  |
| H  | 1.77587000  | -0.99643900 | 2.48619300  |
| H  | 1.05833900  | -0.75657600 | 4.76459800  |
| N  | -1.93853400 | -0.58857300 | -0.18633400 |
| C  | -2.81107200 | -0.74717200 | 0.84672800  |
| C  | -3.72625800 | -1.01212100 | -1.77191000 |
| C  | -4.18412200 | -1.07698800 | 0.60089200  |
| C  | -4.60899600 | -1.21038500 | -0.75138500 |
| H  | -4.04894200 | -1.09489300 | -2.80332800 |
| H  | -5.64715800 | -1.45755000 | -0.94919600 |
| C  | -2.39686800 | -0.58651900 | 2.21002500  |
| C  | -5.07872800 | -1.23736000 | 1.66740000  |

|   |             |             |             |
|---|-------------|-------------|-------------|
| C | -4.66167200 | -1.07256400 | 2.97955200  |
| H | -5.36354900 | -1.18601800 | 3.79807900  |
| C | -3.34066000 | -0.74858200 | 3.24079100  |
| H | -3.00891000 | -0.60294500 | 4.26148800  |
| H | -6.11363900 | -1.47668100 | 1.44085900  |
| O | -0.76770100 | -0.34444500 | 3.91814500  |
| C | -2.37962600 | -0.70385700 | -1.48729100 |
| C | -1.38688200 | -0.50676000 | -2.48515300 |
| C | 0.94970000  | -0.25467200 | -2.88925000 |
| C | 1.16031100  | -1.39862400 | -3.67455200 |
| C | 1.92269900  | 0.75160700  | -2.90630200 |
| C | 2.30777000  | -1.53258800 | -4.44324400 |
| C | 3.06527800  | 0.61462500  | -3.68236400 |
| C | 3.27013100  | -0.52744000 | -4.45121600 |
| H | 2.45552300  | -2.43470700 | -5.02917500 |
| H | 3.80220700  | 1.41136500  | -3.68550700 |
| H | 4.16907400  | -0.63383400 | -5.04893300 |
| H | 0.42919000  | -2.20015800 | -3.64509800 |
| H | 1.76134200  | 1.64936500  | -2.32448600 |
| H | 1.82320500  | 0.77291100  | 2.41268000  |
| H | 0.69135300  | 0.97513000  | 4.52830900  |
| N | -0.17246700 | -0.16095500 | -2.03890600 |
| C | -1.74195000 | -0.60677800 | -3.93712500 |
| H | -0.96607700 | -0.17147100 | -4.56548100 |
| H | -1.89169000 | -1.64033800 | -4.26695700 |
| H | -2.67441600 | -0.07228000 | -4.13606400 |
| C | 2.89314600  | -1.87072400 | -0.31675700 |
| H | 2.05635300  | -1.15783500 | -0.27869200 |
| H | 3.35686400  | -1.76889800 | -1.30336300 |
| C | 2.39959200  | -3.29727000 | -0.06523900 |
| H | 3.27902300  | -3.95979000 | -0.08527100 |
| C | 1.46554000  | -3.74418600 | -1.18933300 |
| H | 0.60128900  | -3.06258500 | -1.23078900 |
| H | 1.98971100  | -3.59239800 | -2.13977200 |
| C | 1.00362500  | -5.18695200 | -1.08475600 |
| H | 0.36851200  | -5.46897200 | -1.92835400 |
| H | 1.85787200  | -5.87133500 | -1.07484600 |
| H | 0.43584700  | -5.36875200 | -0.16861700 |
| C | 1.79288600  | -3.40774100 | 1.31716900  |
| C | 2.61285000  | -3.58457700 | 2.43404200  |
| C | 0.42450700  | -3.27633100 | 1.55902000  |
| C | 2.11307900  | -3.59354600 | 3.72832800  |
| H | 3.68320100  | -3.71473800 | 2.28631900  |
| C | -0.10130000 | -3.30104400 | 2.84356800  |
| H | -0.26497000 | -3.14160300 | 0.72881800  |
| C | 0.73483300  | -3.42562500 | 3.96744900  |
| H | 2.79876800  | -3.73906500 | 4.55423800  |
| H | -1.17331100 | -3.20387500 | 2.96759900  |
| C | -1.20431100 | -3.43481800 | 5.44695500  |
| H | -1.63476500 | -4.38514800 | 5.09498700  |
| H | -1.42758700 | -3.33128200 | 6.50881600  |

|    |             |             |             |
|----|-------------|-------------|-------------|
| H  | -1.70845900 | -2.61867700 | 4.92263000  |
| Si | 0.98016900  | 2.26485200  | 0.08921700  |
| H  | 3.61756400  | -1.55191600 | 0.43862600  |
| H  | 0.87827800  | 3.19802800  | -1.06249100 |
| C  | 0.18381100  | 3.18854800  | 1.58142000  |
| H  | 0.38787100  | 2.67625500  | 2.52570600  |
| H  | 0.55614800  | 4.21236300  | 1.67390900  |
| H  | -0.90296900 | 3.23864400  | 1.47454400  |
| H  | 2.44340100  | 2.20270900  | 0.38329500  |
| N  | 0.22759700  | -3.35417800 | 5.25774900  |
| C  | 1.06959300  | -3.76593800 | 6.35676500  |
| H  | 1.96404300  | -3.13763600 | 6.42438900  |
| H  | 0.51946200  | -3.64923400 | 7.29013600  |
| H  | 1.40315600  | -4.81265800 | 6.28209100  |

### TS<sub>1c</sub>

0 2

|    |             |             |             |
|----|-------------|-------------|-------------|
| Fe | -0.03438000 | 0.02168800  | 0.00568800  |
| N  | -0.02722000 | 0.01233100  | 1.95407700  |
| C  | 1.12449900  | 0.10459700  | 2.85189500  |
| C  | -1.10699100 | 0.19609500  | 2.67319200  |
| C  | 0.53226300  | 0.63310800  | 4.15529700  |
| H  | 1.57943000  | -0.88622700 | 2.95991500  |
| H  | 0.81968600  | 0.06970200  | 5.04409800  |
| N  | -1.86040900 | -0.61946900 | 0.00975700  |
| C  | -2.81083300 | -0.40099400 | 0.95127900  |
| C  | -3.52014000 | -1.66580000 | -1.41730100 |
| C  | -4.19152000 | -0.68954300 | 0.68699500  |
| C  | -4.51229300 | -1.31391700 | -0.55490300 |
| H  | -3.75441800 | -2.17797600 | -2.34337000 |
| H  | -5.55208300 | -1.53124100 | -0.77707400 |
| C  | -2.46723100 | 0.10188300  | 2.24814600  |
| C  | -5.16307300 | -0.36839600 | 1.63726800  |
| C  | -4.81727000 | 0.19348800  | 2.86281000  |
| H  | -5.58660400 | 0.43921200  | 3.58644800  |
| C  | -3.48737100 | 0.40392800  | 3.17137100  |
| H  | -3.20160900 | 0.78699000  | 4.14306500  |
| H  | -6.20281100 | -0.57837700 | 1.40298800  |
| O  | -0.88944900 | 0.48806700  | 3.98035800  |
| C  | -2.17307300 | -1.33893300 | -1.12980000 |
| C  | -1.06152000 | -1.69289000 | -1.91940600 |
| C  | 1.32601400  | -1.60968100 | -2.10601900 |
| C  | 2.36045200  | -2.20638400 | -1.37652800 |
| C  | 1.53309000  | -1.33045600 | -3.46181900 |
| C  | 3.55310700  | -2.55371900 | -1.99700500 |
| C  | 2.73168100  | -1.66773300 | -4.07504200 |
| C  | 3.74301800  | -2.29176900 | -3.35067300 |
| H  | 4.33926800  | -3.03092500 | -1.41993500 |
| H  | 2.88102100  | -1.42783400 | -5.12369700 |
| H  | 4.67752000  | -2.55782200 | -3.83466900 |
| H  | 2.19709600  | -2.39770500 | -0.32021400 |

|   |             |             |             |
|---|-------------|-------------|-------------|
| H | 0.75718000  | -0.81878100 | -4.02219800 |
| H | 1.88431400  | 0.76490400  | 2.42636800  |
| H | 0.74719300  | 1.69345000  | 4.32425900  |
| N | 0.13091300  | -1.28695500 | -1.42898600 |
| C | -1.21571500 | -2.54042200 | -3.14358200 |
| H | -0.33673300 | -3.16709500 | -3.30275100 |
| H | -2.08050400 | -3.19910700 | -3.05268200 |
| H | -1.35388000 | -1.95054400 | -4.05679100 |
| C | -0.30889100 | 1.77656800  | -0.85720400 |
| H | 1.47174700  | 0.34666100  | 0.02706300  |
| C | 1.10480900  | 1.71018000  | -0.61087400 |
| C | 2.03453800  | 1.58083000  | -1.78790700 |
| C | 3.31365900  | 1.03728400  | -1.62645400 |
| C | 1.70757500  | 2.10651800  | -3.03606300 |
| C | 4.22069100  | 1.01191300  | -2.67101500 |
| H | 3.58545000  | 0.60246000  | -0.66682600 |
| C | 2.61809600  | 2.07305700  | -4.08951100 |
| H | 0.73232800  | 2.56015400  | -3.18486400 |
| C | 3.88847000  | 1.52620400  | -3.92889200 |
| H | 5.19947500  | 0.56236900  | -2.52141100 |
| H | 2.33448500  | 2.48484000  | -5.05507900 |
| C | 1.71079400  | 2.65597900  | 0.43817700  |
| H | 2.55708000  | 2.15704100  | 0.92772300  |
| C | 0.76420100  | 3.23696300  | 1.47450100  |
| H | 1.32146500  | 3.77201100  | 2.24822700  |
| H | 0.07106600  | 3.95219600  | 1.02537600  |
| H | 0.15844600  | 2.47312000  | 1.96472100  |
| H | -0.94637000 | 2.39998200  | -0.23490600 |
| H | -0.69001100 | 1.60443000  | -1.86119300 |
| H | 2.16677100  | 3.48422500  | -0.11953200 |
| C | 4.86593700  | 1.45909300  | -5.06209700 |
| H | 5.14186400  | 0.42293100  | -5.28696200 |
| H | 4.45847500  | 1.89913700  | -5.97441300 |
| H | 5.79627000  | 1.98516300  | -4.82660800 |

Imaginary Frequency- -686.33

## He

0 2

|    |             |             |             |
|----|-------------|-------------|-------------|
| Fe | 0.01289900  | -0.18592800 | 0.13254000  |
| N  | -0.11850900 | -0.16090700 | 2.05436100  |
| C  | 0.98457200  | -0.18927500 | 3.02366900  |
| C  | -1.23616700 | -0.12389800 | 2.73309200  |
| C  | 0.31143100  | 0.23787700  | 4.31516400  |
| H  | 1.39548500  | -1.20482400 | 3.07411700  |
| H  | 0.61353200  | -0.32274300 | 5.19944500  |
| N  | -1.93946100 | -0.57942600 | -0.07826900 |
| C  | -2.90698600 | -0.48729900 | 0.87503400  |
| C  | -3.63669000 | -1.02350900 | -1.75792100 |
| C  | -4.29096600 | -0.65146100 | 0.53781500  |
| C  | -4.62102700 | -0.93082600 | -0.81720600 |
| H  | -3.88275800 | -1.21868600 | -2.79528400 |

|   |             |             |             |
|---|-------------|-------------|-------------|
| H | -5.66516300 | -1.05909300 | -1.08440100 |
| C | -2.58465600 | -0.22607200 | 2.24834100  |
| C | -5.28370400 | -0.53014600 | 1.51993600  |
| C | -4.95299200 | -0.25682500 | 2.83835400  |
| H | -5.72709800 | -0.15921600 | 3.59108900  |
| C | -3.62231400 | -0.11170600 | 3.19208000  |
| H | -3.35324700 | 0.09100700  | 4.22077000  |
| H | -6.32119700 | -0.64903900 | 1.22131700  |
| O | -1.08507200 | -0.02344300 | 4.07808100  |
| C | -2.29112500 | -0.83693300 | -1.38554300 |
| C | -1.20953100 | -0.86697700 | -2.31464400 |
| C | 1.12543900  | -0.48267200 | -2.63574500 |
| C | 2.26325900  | -1.22871100 | -2.31584400 |
| C | 1.18122100  | 0.41451400  | -3.70685200 |
| C | 3.42373500  | -1.09546400 | -3.06423400 |
| C | 2.34961500  | 0.55217100  | -4.44657900 |
| C | 3.47402900  | -0.20400200 | -4.13294100 |
| H | 4.29829300  | -1.68393400 | -2.80602000 |
| H | 2.38280800  | 1.26145300  | -5.26756600 |
| H | 4.38567500  | -0.09302300 | -4.71003800 |
| H | 2.22340500  | -1.89849500 | -1.46174000 |
| H | 0.31082400  | 1.02331500  | -3.93306800 |
| H | 1.79177500  | 0.48110400  | 2.72254300  |
| H | 0.42658200  | 1.30988500  | 4.51350300  |
| N | -0.01292600 | -0.57506300 | -1.80846500 |
| C | -1.43718000 | -1.24119600 | -3.74566600 |
| H | -0.51445500 | -1.58258700 | -4.21442000 |
| H | -2.17602000 | -2.04065800 | -3.82729600 |
| H | -1.80828300 | -0.39843600 | -4.33975800 |
| C | 1.68240900  | 0.92894500  | 0.08845400  |
| H | 0.86308500  | 2.18751400  | 1.65513900  |
| C | 1.53780900  | 2.28776000  | 0.78797100  |
| C | 2.85064800  | 2.81103600  | 1.32834700  |
| C | 2.97038100  | 3.23937800  | 2.64987100  |
| C | 3.98976900  | 2.88883100  | 0.51858100  |
| C | 4.17657000  | 3.72394200  | 3.14984200  |
| H | 2.09625700  | 3.20059300  | 3.29799100  |
| C | 5.18921300  | 3.37666300  | 1.01393000  |
| H | 3.92993500  | 2.55092700  | -0.51321200 |
| C | 5.30860400  | 3.80219900  | 2.34175300  |
| H | 4.23939100  | 4.04944500  | 4.18552400  |
| H | 6.05786100  | 3.42833800  | 0.36133300  |
| C | 0.88724100  | 3.32944700  | -0.13570800 |
| H | 0.84048900  | 4.28893700  | 0.39451100  |
| C | -0.50097600 | 2.94151000  | -0.61725800 |
| H | -0.99043200 | 3.76706200  | -1.14162400 |
| H | -0.46849200 | 2.08816600  | -1.30130400 |
| H | -1.14882400 | 2.65835300  | 0.22226500  |
| H | 2.07659600  | 1.08226700  | -0.92369100 |
| H | 2.42527800  | 0.30287700  | 0.61025700  |
| H | 1.54722600  | 3.49603300  | -0.99846900 |

|   |            |            |            |
|---|------------|------------|------------|
| C | 6.61418000 | 4.31615200 | 2.86961200 |
| H | 6.99302900 | 5.14806300 | 2.26809700 |
| H | 6.52127900 | 4.66769800 | 3.89909500 |
| H | 7.38802600 | 3.54179300 | 2.85500300 |

### IIIc

0 2

|    |             |             |             |
|----|-------------|-------------|-------------|
| Fe | 0.28304400  | 0.09930900  | -0.11151000 |
| N  | 0.15816500  | 0.10224800  | 1.80395500  |
| C  | 1.24217800  | 0.32991400  | 2.76418900  |
| C  | -0.93371400 | -0.12708600 | 2.48792800  |
| C  | 0.65953600  | -0.19781600 | 4.06371200  |
| H  | 2.14772600  | -0.19513000 | 2.45413900  |
| H  | 0.95675200  | -1.23437400 | 4.26472300  |
| N  | -1.70449000 | 0.08250200  | -0.33455700 |
| C  | -2.63181000 | -0.19401700 | 0.62193500  |
| C  | -3.42887400 | -0.00976600 | -2.03905200 |
| C  | -4.00783800 | -0.39534400 | 0.27433700  |
| C  | -4.37457800 | -0.28567800 | -1.09452100 |
| H  | -3.69820700 | 0.04915100  | -3.08753800 |
| H  | -5.41282000 | -0.44325800 | -1.37075900 |
| C  | -2.27185400 | -0.31286600 | 2.00613900  |
| C  | -4.95386200 | -0.71722900 | 1.25871400  |
| C  | -4.58440600 | -0.83533500 | 2.58988800  |
| H  | -5.32076200 | -1.08561100 | 3.34543300  |
| C  | -3.26315300 | -0.63252900 | 2.95252300  |
| H  | -2.96502300 | -0.72315000 | 3.98929500  |
| H  | -5.98345800 | -0.87782400 | 0.95136200  |
| O  | -0.76057400 | -0.17725100 | 3.83618800  |
| C  | -2.08571700 | 0.16567400  | -1.65388400 |
| C  | -1.02873500 | 0.38623600  | -2.58640100 |
| C  | 1.34546900  | 0.51486000  | -2.86968400 |
| C  | 1.57459000  | -0.31280700 | -3.97500300 |
| C  | 2.34467000  | 1.41562700  | -2.48452100 |
| C  | 2.76644400  | -0.22447600 | -4.68508500 |
| C  | 3.52620200  | 1.50847500  | -3.20338900 |
| C  | 3.74455600  | 0.68908200  | -4.30892600 |
| H  | 2.93339100  | -0.88202100 | -5.53243600 |
| H  | 4.28725200  | 2.21793600  | -2.89452900 |
| H  | 4.67416200  | 0.75461100  | -4.86380100 |
| H  | 0.82338200  | -1.04543300 | -4.25486300 |
| H  | 2.17721200  | 2.02901600  | -1.60345600 |
| H  | 1.47596800  | 1.40084900  | 2.80752600  |
| H  | 0.87022300  | 0.41011000  | 4.94342200  |
| N  | 0.19707400  | 0.39739000  | -2.06629600 |
| C  | -1.33108700 | 0.62240700  | -4.03285800 |
| H  | -0.50713700 | 1.13098700  | -4.53281400 |
| H  | -1.51133700 | -0.31367100 | -4.57506300 |
| H  | -2.22744900 | 1.23527800  | -4.14703900 |
| C  | 2.00651100  | -0.94884000 | -0.17007500 |
| H  | 2.38321900  | -1.07350700 | -1.19378000 |

|   |             |             |             |
|---|-------------|-------------|-------------|
| H | 2.80966800  | -0.45493100 | 0.39767500  |
| C | 1.67582100  | -2.32224900 | 0.43201600  |
| H | 1.59949700  | -2.22541900 | 1.52765300  |
| C | 2.76260200  | -3.36969800 | 0.14378300  |
| H | 2.84160500  | -3.49703300 | -0.94427200 |
| H | 3.72855000  | -2.95904400 | 0.46342400  |
| C | 2.51503500  | -4.71251700 | 0.80939800  |
| H | 3.32045000  | -5.42313100 | 0.60657800  |
| H | 2.43617600  | -4.60740800 | 1.89697700  |
| H | 1.58077000  | -5.16310700 | 0.46149300  |
| C | 0.31199400  | -2.78290200 | -0.05011800 |
| C | -0.70654300 | -3.13078000 | 0.83626400  |
| C | 0.01477100  | -2.80279700 | -1.41827100 |
| C | -1.98041300 | -3.45847500 | 0.38174100  |
| H | -0.50514000 | -3.11353000 | 1.90664000  |
| C | -1.25496100 | -3.12713700 | -1.87247200 |
| H | 0.78698600  | -2.51783800 | -2.12976700 |
| C | -2.28206500 | -3.45363300 | -0.97985200 |
| H | -2.76277600 | -3.69414000 | 1.09976200  |
| H | -1.46666400 | -3.10558400 | -2.94055700 |
| C | -3.65591700 | -3.79936800 | -1.46994100 |
| H | -3.75454200 | -4.87330300 | -1.66502600 |
| H | -4.42123600 | -3.53444400 | -0.73566400 |
| H | -3.89244000 | -3.28073800 | -2.40262700 |

### TS<sub>2c</sub>

0 2

|    |             |             |             |
|----|-------------|-------------|-------------|
| Fe | 0.23525100  | -0.25227000 | -0.21323400 |
| N  | 0.10046100  | -0.19805300 | 1.72001100  |
| C  | 1.20204700  | 0.12024400  | 2.63322300  |
| C  | -0.99378100 | -0.20586900 | 2.42410900  |
| C  | 0.59539400  | -0.13941600 | 3.99967500  |
| H  | 2.07690700  | -0.49752900 | 2.42534100  |
| H  | 0.81887400  | -1.14634700 | 4.37288300  |
| N  | -1.72954100 | -0.23716100 | -0.40838500 |
| C  | -2.68226900 | -0.33258700 | 0.56561400  |
| C  | -3.47814600 | -0.29706900 | -2.10019700 |
| C  | -4.07185900 | -0.44528800 | 0.23105100  |
| C  | -4.43911100 | -0.41887400 | -1.14164800 |
| H  | -3.74335000 | -0.28757300 | -3.15117000 |
| H  | -5.48923600 | -0.50316600 | -1.40418900 |
| C  | -2.34510400 | -0.33684800 | 1.95692600  |
| C  | -5.04095100 | -0.58415700 | 1.23580500  |
| C  | -4.68897100 | -0.59812600 | 2.57550500  |
| H  | -5.44560100 | -0.70284000 | 3.34480000  |
| C  | -3.35463800 | -0.46776700 | 2.92494400  |
| H  | -3.06174600 | -0.46757500 | 3.96723700  |
| H  | -6.08107700 | -0.67401200 | 0.93479400  |
| O  | -0.82273700 | -0.05719000 | 3.76339200  |
| C  | -2.12039800 | -0.22109500 | -1.73232900 |
| C  | -1.06630400 | -0.16893900 | -2.68174700 |

|    |             |             |             |
|----|-------------|-------------|-------------|
| C  | 1.28553900  | -0.27301400 | -3.00574000 |
| C  | 1.41380900  | -1.28913300 | -3.96156500 |
| C  | 2.33439800  | 0.64022700  | -2.85453100 |
| C  | 2.56147100  | -1.39193800 | -4.73767000 |
| C  | 3.47384100  | 0.53909900  | -3.64072400 |
| C  | 3.59843100  | -0.47840900 | -4.58214700 |
| H  | 2.64504700  | -2.19328200 | -5.46505700 |
| H  | 4.27296100  | 1.26256700  | -3.51424700 |
| H  | 4.49460500  | -0.55858600 | -5.18787200 |
| H  | 0.60647000  | -2.00583100 | -4.08104100 |
| H  | 2.24621200  | 1.43285300  | -2.12018200 |
| H  | 1.49756800  | 1.16883100  | 2.48866200  |
| H  | 0.85317500  | 0.59080300  | 4.76651000  |
| N  | 0.15805000  | -0.22045900 | -2.15665300 |
| C  | -1.35306000 | -0.00801700 | -4.14244500 |
| H  | -0.48995700 | 0.39288100  | -4.67356900 |
| H  | -1.61781300 | -0.95645500 | -4.62623800 |
| H  | -2.18908700 | 0.67647500  | -4.30097100 |
| C  | 1.99050900  | -1.29925300 | -0.11227000 |
| H  | 2.32357100  | -1.50729800 | -1.13537000 |
| H  | 2.88018800  | -0.94207500 | 0.42234700  |
| C  | 1.51046200  | -2.59960700 | 0.56006000  |
| H  | 1.44564200  | -2.43349200 | 1.64569900  |
| C  | 2.52258300  | -3.73498300 | 0.33200300  |
| H  | 2.59232700  | -3.93045600 | -0.74621300 |
| H  | 3.51550500  | -3.37920500 | 0.63420400  |
| C  | 2.17543000  | -5.01450200 | 1.07324200  |
| H  | 2.92809800  | -5.79061500 | 0.91429900  |
| H  | 2.10421400  | -4.84120300 | 2.15228100  |
| H  | 1.21188900  | -5.41595500 | 0.74647200  |
| C  | 0.11978300  | -2.99374000 | 0.10220900  |
| C  | -0.91418400 | -3.23610100 | 1.00888500  |
| C  | -0.16410000 | -3.13560400 | -1.25991400 |
| C  | -2.19252800 | -3.55898800 | 0.57208600  |
| H  | -0.71689200 | -3.13756600 | 2.07492100  |
| C  | -1.44150400 | -3.45503700 | -1.69747400 |
| H  | 0.62979100  | -2.96380700 | -1.98229400 |
| C  | -2.48500600 | -3.65957900 | -0.78944700 |
| H  | -2.98780100 | -3.70585200 | 1.29940400  |
| H  | -1.64329500 | -3.52804200 | -2.76480500 |
| Si | 0.37339100  | 2.09099300  | -0.18801500 |
| H  | 1.58749600  | 0.35103800  | -0.18252800 |
| H  | -0.08306400 | 2.60373300  | -1.50277000 |
| C  | -0.78149800 | 2.81177300  | 1.15467600  |
| H  | -0.42597600 | 2.59500900  | 2.16561900  |
| H  | -0.84980500 | 3.89896700  | 1.05849300  |
| H  | -1.79076800 | 2.40278700  | 1.06648400  |
| H  | 1.70069500  | 2.72137000  | 0.03686500  |
| C  | -3.86863700 | -3.99338300 | -1.25860100 |
| H  | -4.01859600 | -5.07693300 | -1.32518300 |
| H  | -4.62743100 | -3.60552300 | -0.57389700 |



H -4.06770800 -3.57875100 -2.24983800  
Imaginary Frequency: -493.76

**IVc**

0 2

|    |             |             |             |
|----|-------------|-------------|-------------|
| Fe | -0.44948100 | 0.40045300  | -0.10056600 |
| N  | -0.50914100 | -0.16437500 | 1.71301300  |
| C  | 0.63148900  | -0.34093500 | 2.61540300  |
| C  | -1.60601000 | -0.36188100 | 2.40249500  |
| C  | 0.00448900  | -0.96635700 | 3.85314000  |
| H  | 1.38874100  | -0.98145900 | 2.15473200  |
| H  | 0.15884500  | -2.04954100 | 3.90337000  |
| N  | -2.43025300 | 0.31950000  | -0.32962200 |
| C  | -3.35556100 | 0.10373200  | 0.63944300  |
| C  | -4.19099000 | 0.77939900  | -1.93218800 |
| C  | -4.75703300 | 0.18967600  | 0.34530500  |
| C  | -5.13946100 | 0.54692600  | -0.97868500 |
| H  | -4.47868300 | 1.05481700  | -2.94058500 |
| H  | -6.19674200 | 0.62919200  | -1.21060900 |
| C  | -2.97019100 | -0.24461700 | 1.97846300  |
| C  | -5.70945300 | -0.07919500 | 1.33631100  |
| C  | -5.31874300 | -0.43435500 | 2.62093700  |
| H  | -6.06215100 | -0.64224600 | 3.38248100  |
| C  | -3.97281000 | -0.51252900 | 2.93226800  |
| H  | -3.66268400 | -0.77982200 | 3.93442300  |
| H  | -6.76147700 | 0.00097800  | 1.07850800  |
| O  | -1.40472700 | -0.72727300 | 3.69391100  |
| C  | -2.82474600 | 0.64862500  | -1.60747800 |
| C  | -1.76751700 | 0.79627600  | -2.54831000 |
| C  | 0.57191200  | 0.49451900  | -2.90684000 |
| C  | 0.53521600  | -0.49881400 | -3.89919600 |
| C  | 1.75901400  | 1.21458800  | -2.72669200 |
| C  | 1.65077200  | -0.76281300 | -4.68196000 |
| C  | 2.86590100  | 0.95581500  | -3.52374300 |
| C  | 2.82344500  | -0.03519600 | -4.50067400 |
| H  | 1.60530100  | -1.54635300 | -5.43187300 |
| H  | 3.77293100  | 1.53316600  | -3.37544000 |
| H  | 3.69554700  | -0.24126200 | -5.11181300 |
| H  | -0.37205300 | -1.08396500 | -4.02282000 |
| H  | 1.79375000  | 1.98702400  | -1.96864800 |
| H  | 1.09690700  | 0.63219800  | 2.81494600  |
| H  | 0.31795500  | -0.51731400 | 4.79632800  |
| N  | -0.53095400 | 0.69054500  | -2.05176400 |
| C  | -2.05969400 | 1.11630700  | -3.98184200 |
| H  | -1.16301400 | 1.44639600  | -4.50515400 |
| H  | -2.46569500 | 0.25992600  | -4.53116300 |
| H  | -2.80188200 | 1.91605000  | -4.04975900 |
| C  | 2.86353900  | -1.43990700 | -0.43770100 |
| H  | 2.63108700  | -1.32391900 | -1.50103600 |
| H  | 3.94858400  | -1.34754500 | -0.33663500 |
| C  | 2.37815900  | -2.78661400 | 0.09370800  |

|    |             |             |             |
|----|-------------|-------------|-------------|
| H  | 2.74262800  | -2.90752900 | 1.12609900  |
| C  | 2.97977200  | -3.92922900 | -0.74024100 |
| H  | 2.62706400  | -3.82120400 | -1.77539000 |
| H  | 4.06729400  | -3.78996200 | -0.78053000 |
| C  | 2.65401400  | -5.31746600 | -0.22138700 |
| H  | 3.13222100  | -6.09357800 | -0.82326200 |
| H  | 2.99630900  | -5.44617100 | 0.81085500  |
| H  | 1.57717300  | -5.50764400 | -0.23199000 |
| C  | 0.86942900  | -2.87817700 | 0.14083300  |
| C  | 0.20200300  | -3.40941600 | 1.24608800  |
| C  | 0.09067600  | -2.45510700 | -0.93871600 |
| C  | -1.18510700 | -3.50635700 | 1.27705800  |
| H  | 0.78569200  | -3.75245300 | 2.09901100  |
| C  | -1.29696300 | -2.55408300 | -0.90914600 |
| H  | 0.57426400  | -2.04790100 | -1.82222000 |
| C  | -1.96444900 | -3.08286800 | 0.19718900  |
| H  | -1.67643100 | -3.90917400 | 2.16060700  |
| H  | -1.87537800 | -2.20186100 | -1.76108800 |
| Si | 0.75370900  | 2.41264400  | 0.48040100  |
| H  | 2.40430100  | -0.59313700 | 0.08407100  |
| H  | 0.89839800  | 3.47566700  | -0.54677600 |
| C  | -0.25607400 | 3.18998600  | 1.92396800  |
| H  | -0.27182100 | 2.53523400  | 2.79999500  |
| H  | 0.14876000  | 4.15598600  | 2.23766700  |
| H  | -1.29634100 | 3.34659400  | 1.62605200  |
| H  | 2.13756400  | 2.20642700  | 1.00136300  |
| C  | -3.45731200 | -3.21396300 | 0.21166800  |
| H  | -3.88306300 | -2.92338300 | 1.17625300  |
| H  | -3.92002500 | -2.59150900 | -0.55803300 |
| H  | -3.76538800 | -4.24837900 | 0.02337700  |

### I'''(2a)

0 2

|    |             |             |             |
|----|-------------|-------------|-------------|
| Fe | 0.09586900  | 0.02684400  | -0.09563300 |
| N  | 0.26029700  | 0.08854100  | 1.89498600  |
| C  | 1.42126600  | 0.05409800  | 2.83964200  |
| C  | -0.75924500 | 0.50935000  | 2.60076900  |
| C  | 0.96356700  | 1.02000500  | 3.91306100  |
| H  | 1.28002200  | 0.76404000  | 4.92405100  |
| N  | -1.83542800 | -0.45373300 | 0.08424600  |
| C  | -2.67274700 | -0.06443900 | 1.07517600  |
| C  | -3.70555800 | -1.47620300 | -1.07533200 |
| C  | -4.09055400 | -0.24847400 | 0.96656000  |
| C  | -4.57890400 | -0.98205200 | -0.15284400 |
| H  | -4.06161300 | -2.05894200 | -1.91770300 |
| H  | -5.64735500 | -1.14953700 | -0.24394100 |
| C  | -2.15959900 | 0.54192800  | 2.26324400  |
| C  | -4.93913500 | 0.28667000  | 1.94162500  |
| C  | -4.42785600 | 0.96882200  | 3.03760000  |
| H  | -5.09655300 | 1.39271200  | 3.77844600  |

|   |             |             |             |
|---|-------------|-------------|-------------|
| C | -3.05669000 | 1.07367900  | 3.20562200  |
| H | -2.64979100 | 1.54570700  | 4.09079700  |
| H | -6.01110100 | 0.15771600  | 1.82226400  |
| O | -0.46978000 | 0.92694100  | 3.85685300  |
| C | -2.32471400 | -1.19740700 | -0.96243200 |
| C | -1.35512400 | -1.61361400 | -1.90940500 |
| C | 0.93257100  | -1.43545500 | -2.62395800 |
| C | 1.99988900  | -2.28577700 | -2.24391500 |
| C | 0.95232200  | -0.78635500 | -3.88107800 |
| C | 3.10012700  | -2.40326200 | -3.08756500 |
| C | 2.09143500  | -0.92923400 | -4.68011800 |
| C | 3.16350600  | -1.71110400 | -4.29045500 |
| H | 3.92459200  | -3.04714800 | -2.80137000 |
| H | 2.12388200  | -0.41899800 | -5.63912600 |
| H | 4.03620800  | -1.80185300 | -4.92905900 |
| H | 1.24200500  | 2.05707600  | 3.68913200  |
| N | -0.10423000 | -1.21217000 | -1.67436800 |
| C | -1.74641600 | -2.49710500 | -3.05285900 |
| H | -0.86877000 | -2.85510800 | -3.59192000 |
| H | -2.29717400 | -3.37120900 | -2.69196500 |
| H | -2.39700600 | -1.98595500 | -3.77009500 |
| C | -0.30164100 | 1.75480000  | -1.16172300 |
| H | 1.57484900  | -0.16215500 | -0.14733600 |
| C | 0.98261900  | 2.07357800  | -0.69319600 |
| C | 2.15356500  | 1.95664500  | -1.65383600 |
| H | -1.19336500 | 2.21568800  | -0.74689200 |
| H | -0.41691400 | 1.39450600  | -2.17720900 |
| C | 1.90044200  | -3.11073300 | -0.97721200 |
| H | 1.47693400  | -2.45448700 | -0.20523500 |
| C | 3.24101600  | -3.63981200 | -0.48269800 |
| H | 3.99733300  | -2.85323300 | -0.41790400 |
| H | 3.13118800  | -4.07887600 | 0.51268900  |
| H | 3.63219500  | -4.42595000 | -1.13714800 |
| C | 0.92377100  | -4.27477900 | -1.16755700 |
| H | -0.08004100 | -3.92891500 | -1.42060700 |
| H | 1.26339500  | -4.93892900 | -1.96969000 |
| H | 0.84641400  | -4.87014400 | -0.25289600 |
| C | -0.20912100 | 0.00781500  | -4.46448000 |
| H | -1.01736300 | 0.04687100  | -3.72532300 |
| C | 0.15497900  | 1.44693200  | -4.83821300 |
| H | 0.96978700  | 1.46948700  | -5.56820100 |
| H | -0.70374900 | 1.94551200  | -5.29729500 |
| H | 0.46416500  | 2.04806300  | -3.98258200 |
| C | -0.74456700 | -0.68787900 | -5.72322300 |
| H | -0.94569600 | -1.74873400 | -5.56750300 |
| H | -1.66814200 | -0.21245600 | -6.06698300 |
| H | -0.01844500 | -0.61418600 | -6.53887700 |
| C | 1.11195200  | 2.96054100  | 0.48178100  |
| C | 0.01528400  | 3.25017400  | 1.32144000  |
| C | 2.31360300  | 3.60870400  | 0.79769400  |
| C | 0.11785500  | 4.09821900  | 2.40514100  |

|   |             |             |             |
|---|-------------|-------------|-------------|
| H | -0.94920100 | 2.79442400  | 1.12675400  |
| C | 2.43902700  | 4.46171400  | 1.89167500  |
| H | 3.18613600  | 3.46163800  | 0.17222400  |
| C | 1.33992500  | 4.70510100  | 2.71294200  |
| H | -0.73744700 | 4.29484100  | 3.04368300  |
| H | 3.39565000  | 4.93163800  | 2.08725900  |
| O | 1.35434300  | 5.49759100  | 3.81981900  |
| C | 2.58521200  | 6.09674500  | 4.16100500  |
| H | 2.40465600  | 6.66940200  | 5.06916600  |
| H | 3.36045500  | 5.34481000  | 4.35672400  |
| H | 2.94052900  | 6.77299000  | 3.37395200  |
| H | 1.78999800  | 1.45284500  | -2.55267800 |
| H | 2.40478300  | 2.98121500  | -1.97301800 |
| C | 3.43861600  | 1.24360700  | -1.24404500 |
| H | 4.19843300  | 1.37785300  | -2.02018300 |
| H | 3.86560200  | 1.60425300  | -0.30478800 |
| H | 3.26679100  | 0.17021500  | -1.13339100 |
| H | 1.43537000  | -0.96514800 | 3.26092500  |
| C | 2.79361400  | 0.34747700  | 2.22834200  |
| H | 2.61508600  | 1.01901900  | 1.38363000  |
| C | 3.43403800  | -0.93086400 | 1.71238400  |
| H | 4.34876700  | -0.72041000 | 1.15027700  |
| H | 3.70119200  | -1.59637100 | 2.54228900  |
| H | 2.75311600  | -1.46797100 | 1.05335300  |
| C | 3.73693900  | 1.04003100  | 3.20835500  |
| H | 4.71172000  | 1.19722900  | 2.73745000  |
| H | 3.37558400  | 2.02136200  | 3.52745900  |
| H | 3.90893900  | 0.43132000  | 4.10406100  |

**I'''(2b)**

0 2

|    |             |             |             |
|----|-------------|-------------|-------------|
| Fe | 0.08924500  | -0.11882900 | -0.03577400 |
| N  | 0.30247200  | -0.15564400 | 1.93632700  |
| C  | 1.48312900  | -0.02545800 | 2.84469700  |
| C  | -0.75369100 | -0.04045600 | 2.70472500  |
| C  | 0.87517400  | 0.75746300  | 3.99180300  |
| H  | 1.70022200  | -1.04743400 | 3.20104200  |
| H  | 1.29144600  | 0.53613100  | 4.97403900  |
| N  | -1.69060200 | -1.01407200 | 0.14282400  |
| C  | -2.55809500 | -0.88208300 | 1.17179100  |
| C  | -3.35575600 | -2.26379200 | -1.09638700 |
| C  | -3.91521300 | -1.33356800 | 1.06099000  |
| C  | -4.28577300 | -2.02573400 | -0.12730500 |
| H  | -3.61798600 | -2.81975500 | -1.98971100 |
| H  | -5.30756700 | -2.37642500 | -0.23186700 |
| C  | -2.13675900 | -0.29553800 | 2.40729800  |
| C  | -4.81824800 | -1.08570200 | 2.10018800  |
| C  | -4.41356000 | -0.43442600 | 3.25868500  |
| H  | -5.12636200 | -0.23879600 | 4.05204700  |
| C  | -3.08907100 | -0.06297900 | 3.41623100  |
| H  | -2.75719800 | 0.39509500  | 4.33913200  |

|   |             |             |             |
|---|-------------|-------------|-------------|
| H | -5.84671600 | -1.41481300 | 1.98267100  |
| O | -0.49891200 | 0.34228800  | 3.98334300  |
| C | -2.04424200 | -1.75917700 | -0.95429700 |
| C | -0.99835900 | -1.97246400 | -1.89114400 |
| C | 1.30436200  | -1.56464600 | -2.43492200 |
| C | 2.38325500  | -2.33253600 | -1.93100000 |
| C | 1.39749400  | -0.93959500 | -3.69583900 |
| C | 3.56331100  | -2.38949100 | -2.66762500 |
| C | 2.60755500  | -1.02726800 | -4.39064600 |
| C | 3.68772300  | -1.72645100 | -3.88361300 |
| H | 4.39965100  | -2.96884200 | -2.29169400 |
| H | 2.69485300  | -0.53053600 | -5.35377800 |
| H | 4.61924800  | -1.77526700 | -4.43929200 |
| H | 0.90588400  | 1.84277000  | 3.81905400  |
| N | 0.16960900  | -1.40340700 | -1.59177200 |
| C | -1.21975900 | -2.84912800 | -3.08412700 |
| H | -0.27531600 | -3.10209700 | -3.56702700 |
| H | -1.71076200 | -3.78317400 | -2.79655400 |
| H | -1.85950000 | -2.36881300 | -3.83258700 |
| C | -0.73826400 | 1.49702200  | -1.01810900 |
| H | 1.55961900  | 0.05995300  | -0.07670300 |
| C | 0.43472400  | 2.03585400  | -0.47058800 |
| C | 1.56871700  | 2.40710600  | -1.38592000 |
| C | 2.64150900  | 1.60025000  | -1.75354800 |
| C | 1.50498400  | 3.68339300  | -1.97665900 |
| C | 3.58718100  | 2.00988800  | -2.69305500 |
| H | 2.72962200  | 0.60796100  | -1.32538400 |
| C | 2.42957600  | 4.10754100  | -2.91243400 |
| H | 0.67901000  | 4.34272600  | -1.71951900 |
| C | 3.47587600  | 3.26065300  | -3.29103900 |
| H | 4.38676900  | 1.32898200  | -2.95867400 |
| H | 2.35266500  | 5.08228500  | -3.38199700 |
| C | 0.35313400  | 2.89635000  | 0.78711900  |
| H | 1.02519900  | 2.50023300  | 1.55627700  |
| C | -1.02805100 | 3.10752300  | 1.38205000  |
| H | -0.96603100 | 3.69368600  | 2.30314300  |
| H | -1.68207100 | 3.64815900  | 0.69202000  |
| H | -1.53025500 | 2.16910800  | 1.62887900  |
| O | 4.31657800  | 3.73863500  | -4.25047300 |
| C | 5.31963600  | 2.85937800  | -4.70973100 |
| H | 6.02900300  | 2.59839200  | -3.91470100 |
| H | 4.88998000  | 1.93337100  | -5.11435600 |
| H | 5.84941900  | 3.38688200  | -5.50146600 |
| H | -1.70847900 | 1.66724400  | -0.55862000 |
| H | -0.76806200 | 1.21727200  | -2.06763400 |
| H | 0.78159900  | 3.87662300  | 0.53804400  |
| C | 2.77815800  | 0.54815600  | 2.25539600  |
| H | 2.50477000  | 1.28187300  | 1.48954900  |
| C | 3.61074800  | 1.24129600  | 3.33175300  |
| H | 3.10812600  | 2.10787400  | 3.76963600  |
| H | 3.86266400  | 0.55229800  | 4.14634200  |

|   |             |             |             |
|---|-------------|-------------|-------------|
| H | 4.55397200  | 1.59645700  | 2.91025400  |
| C | 3.60679200  | -0.53727200 | 1.58657800  |
| H | 3.02955900  | -1.04923600 | 0.81855900  |
| H | 4.49567000  | -0.11460200 | 1.10880800  |
| H | 3.94345100  | -1.28133200 | 2.31834700  |
| C | 0.24869800  | -0.20574000 | -4.36648500 |
| H | -0.62113500 | -0.24179900 | -3.70068100 |
| C | -0.13221900 | -0.88822800 | -5.68489300 |
| H | -1.03659400 | -0.43891200 | -6.10602400 |
| H | 0.66367100  | -0.76790900 | -6.42657100 |
| H | -0.30749700 | -1.95980000 | -5.57075000 |
| C | 0.56651500  | 1.26399400  | -4.64026800 |
| H | -0.27591600 | 1.74973700  | -5.14232800 |
| H | 0.78161000  | 1.81825800  | -3.72750900 |
| H | 1.43819000  | 1.36401100  | -5.29600000 |
| C | 2.22123300  | -3.13748100 | -0.65480500 |
| H | 1.71220000  | -2.48940800 | 0.07368400  |
| C | 1.31707700  | -4.35237600 | -0.88783700 |
| H | 1.74435900  | -5.00883800 | -1.65350200 |
| H | 1.21291000  | -4.93761800 | 0.03066700  |
| H | 0.31482600  | -4.06791200 | -1.20999300 |
| C | 3.53967500  | -3.60920700 | -0.05164900 |
| H | 3.99719600  | -4.39835600 | -0.65768200 |
| H | 4.27011500  | -2.80330000 | 0.04841700  |
| H | 3.36936800  | -4.02964100 | 0.94322800  |

### I'''(2c)

0 2

|    |             |             |             |
|----|-------------|-------------|-------------|
| Fe | 0.96337300  | -0.49533700 | 0.28169500  |
| N  | 0.39027500  | 1.04774900  | 1.42510500  |
| C  | -0.59446900 | 0.97001000  | 2.27491800  |
| H  | 1.11503900  | 2.77805800  | 3.82597600  |
| N  | -0.96200900 | -1.05151600 | 0.25181900  |
| C  | -1.87787500 | -0.90499300 | 1.24036900  |
| C  | -2.56600400 | -2.36740500 | -1.01114400 |
| C  | -3.12288500 | -1.61699500 | 1.21187700  |
| C  | -3.42923800 | -2.37290600 | 0.04343500  |
| H  | -2.80492600 | -2.89665400 | -1.92720100 |
| H  | -4.36777100 | -2.91620400 | 0.00118600  |
| C  | -1.65053200 | -0.00365200 | 2.32680800  |
| C  | -3.99587100 | -1.53691000 | 2.30205600  |
| C  | -3.70802100 | -0.73217000 | 3.39710600  |
| H  | -4.39252800 | -0.68519000 | 4.23659500  |
| C  | -2.56499800 | 0.04949100  | 3.39129600  |
| H  | -2.36827800 | 0.73886800  | 4.20298000  |
| H  | -4.91751200 | -2.11101100 | 2.26825600  |
| O  | -0.66727900 | 1.96814600  | 3.18482500  |
| C  | -1.32480000 | -1.70056300 | -0.90462300 |
| C  | -0.35453000 | -1.66277400 | -1.93425200 |
| C  | 1.86167100  | -1.02782700 | -2.55981800 |
| C  | 2.61161500  | -2.16353500 | -2.92688700 |

|   |             |             |             |
|---|-------------|-------------|-------------|
| C | 2.16240900  | 0.24492100  | -3.10795900 |
| C | 3.69209100  | -1.96760400 | -3.79984200 |
| C | 3.23572900  | 0.37054600  | -3.98173400 |
| C | 4.01275900  | -0.73045600 | -4.32069400 |
| H | 4.31518100  | -2.82505600 | -4.04312500 |
| H | 3.47202100  | 1.34142500  | -4.40396300 |
| H | 4.86306500  | -0.61965600 | -4.98606400 |
| H | 0.07526600  | 3.85866700  | 2.87380500  |
| N | 0.80311100  | -1.08331300 | -1.60646600 |
| C | -0.66520800 | -2.21202900 | -3.29253300 |
| H | 0.11576300  | -1.96589700 | -4.01228000 |
| H | -0.77303700 | -3.30222400 | -3.28255900 |
| H | -1.61053600 | -1.80628800 | -3.66580200 |
| C | 1.38541900  | -1.87257900 | 1.76076200  |
| C | 2.62104000  | -1.27650400 | 1.45117300  |
| H | 0.83485200  | -1.54908300 | 2.64293900  |
| H | 1.12657300  | -2.86642600 | 1.40677600  |
| C | 1.27751500  | 1.43708100  | -2.80489000 |
| H | 0.92481300  | 1.31513300  | -1.77389800 |
| C | 2.00479600  | 2.77286800  | -2.89915500 |
| H | 1.35698600  | 3.58446500  | -2.55463600 |
| H | 2.91407100  | 2.78445300  | -2.28930200 |
| H | 2.29024900  | 3.01608000  | -3.92744100 |
| C | 0.04363400  | 1.43969800  | -3.70996900 |
| H | -0.54119400 | 0.52372300  | -3.59962700 |
| H | -0.61400200 | 2.28213500  | -3.47263300 |
| H | 0.33134500  | 1.52650500  | -4.76342300 |
| C | 1.10442000  | 2.30895300  | 1.66964800  |
| C | 0.45744700  | 2.83718900  | 2.95359300  |
| H | 2.16016900  | 2.08629800  | 1.83711200  |
| C | 1.02014000  | 3.23208300  | 0.45067800  |
| H | 1.51841500  | 2.67226600  | -0.34793700 |
| C | -0.41414100 | 3.50427300  | 0.02153300  |
| C | 1.80602900  | 4.51293000  | 0.69128700  |
| H | -0.98594200 | 4.01454700  | 0.80578000  |
| H | -0.44279600 | 4.14719700  | -0.86255400 |
| H | -0.93911700 | 2.57636000  | -0.22456600 |
| H | 1.35237000  | 5.13087800  | 1.47473100  |
| H | 2.83748900  | 4.30133700  | 0.99111400  |
| H | 1.84491300  | 5.12491400  | -0.21355900 |
| H | 2.21837600  | 0.27986700  | -0.07899800 |
| C | 2.45207900  | -3.61643200 | -2.46965800 |
| H | 3.46015700  | -3.88918900 | -2.12338400 |
| C | 2.13738500  | -4.52503400 | -3.66463000 |
| C | 1.51528400  | -3.96967000 | -1.32020700 |
| H | 2.85923100  | -4.41582800 | -4.47637600 |
| H | 2.13803100  | -5.57471500 | -3.35531400 |
| H | 1.14753900  | -4.30609100 | -4.07636200 |
| H | 1.57791700  | -3.26112200 | -0.49985800 |
| H | 0.46923600  | -4.03910600 | -1.62958500 |
| H | 1.79446600  | -4.95312700 | -0.92916900 |

|   |            |             |             |
|---|------------|-------------|-------------|
| C | 3.19327300 | -0.28494300 | 2.45277800  |
| C | 3.64354300 | -2.03587400 | 0.67133000  |
| C | 3.91912400 | -3.36458100 | 1.00461900  |
| C | 4.43342600 | -1.45122300 | -0.33009100 |
| C | 4.91994800 | -4.09668900 | 0.37046200  |
| H | 3.33076700 | -3.84266900 | 1.78359000  |
| C | 5.44474400 | -2.15441700 | -0.95782700 |
| H | 4.21709600 | -0.43435800 | -0.64414400 |
| C | 5.69139300 | -3.48698500 | -0.61901600 |
| H | 5.08872500 | -5.12831800 | 0.65577100  |
| H | 6.03472700 | -1.70203200 | -1.74747900 |
| H | 2.36198500 | 0.25262700  | 2.92317300  |
| H | 3.64064500 | -0.88211400 | 3.26310100  |
| C | 4.24795300 | 0.68797300  | 1.95028000  |
| H | 5.17093900 | 0.17261000  | 1.67396500  |
| H | 3.90734400 | 1.23339000  | 1.06377400  |
| H | 4.50319100 | 1.41797000  | 2.72440600  |
| O | 6.67809500 | -4.10750800 | -1.32493000 |
| C | 6.91580200 | -5.46703100 | -1.03438600 |
| H | 7.71736800 | -5.78565800 | -1.69888500 |
| H | 7.23249500 | -5.61225400 | 0.00574500  |
| H | 6.02658200 | -6.08246700 | -1.22152300 |

### I'''(2d)

0 2

|    |             |             |             |
|----|-------------|-------------|-------------|
| Fe | 0.35576400  | -0.79852400 | 0.41235400  |
| N  | 0.11358100  | 0.73009600  | 1.66826400  |
| C  | -0.86762900 | 0.77921900  | 2.52223200  |
| H  | 1.12161000  | 2.29363700  | 4.17326300  |
| N  | -1.64205600 | -0.92441200 | 0.32218900  |
| C  | -2.51850900 | -0.66669300 | 1.32327300  |
| C  | -3.47528400 | -1.71480600 | -1.05919300 |
| C  | -3.89089800 | -1.07080200 | 1.22967200  |
| C  | -4.33889300 | -1.61544200 | -0.00934300 |
| H  | -3.81114100 | -2.08533900 | -2.02190900 |
| H  | -5.37721500 | -1.91675400 | -0.10420300 |
| C  | -2.10977900 | 0.04953400  | 2.49165400  |
| C  | -4.74080000 | -0.90590500 | 2.32881400  |
| C  | -4.29461900 | -0.30414000 | 3.49813800  |
| H  | -4.96321600 | -0.18962000 | 4.34391400  |
| C  | -3.00468500 | 0.19814300  | 3.56237000  |
| H  | -2.67229600 | 0.74359800  | 4.43702800  |
| H  | -5.76784700 | -1.24966300 | 2.24395000  |
| O  | -0.73597500 | 1.67633900  | 3.52217200  |
| C  | -2.11411800 | -1.37409400 | -0.88812100 |
| C  | -1.12983100 | -1.49912500 | -1.89720200 |
| C  | 1.21693600  | -1.41576300 | -2.40083300 |
| C  | 1.69056800  | -2.68382300 | -2.79959900 |
| C  | 1.87385200  | -0.23404800 | -2.83127900 |
| C  | 2.87771700  | -2.72278200 | -3.54689400 |
| C  | 3.02847200  | -0.34005900 | -3.59636200 |



|   |             |             |             |
|---|-------------|-------------|-------------|
| C | 3.54850900  | -1.58205100 | -3.93822500 |
| H | 3.28168800  | -3.69563900 | -3.81593000 |
| H | 3.53748800  | 0.55992900  | -3.92379700 |
| H | 4.46729900  | -1.65549800 | -4.51097700 |
| H | 0.22554200  | 3.45752100  | 3.16859600  |
| N | 0.12326700  | -1.25538500 | -1.50080100 |
| C | -1.51142700 | -1.83745800 | -3.30531000 |
| H | -0.65264000 | -1.77882000 | -3.97491100 |
| H | -1.93377800 | -2.84407600 | -3.39524100 |
| H | -2.27457900 | -1.14487200 | -3.67464800 |
| C | 0.46159300  | -2.39900500 | 1.73104900  |
| C | 1.79662700  | -1.99662500 | 1.56686400  |
| C | 2.67469400  | -2.78125100 | 0.61504300  |
| H | -0.12446700 | -2.09977700 | 2.59553700  |
| H | 0.09833100  | -3.29910000 | 1.24634900  |
| C | 1.28770700  | 1.12718500  | -2.51384900 |
| H | 0.85007300  | 1.05665000  | -1.51118100 |
| C | 2.32228400  | 2.24580100  | -2.49536200 |
| H | 1.87097300  | 3.17430400  | -2.13373800 |
| H | 3.16812300  | 2.00611700  | -1.84350000 |
| H | 2.71894600  | 2.45794900  | -3.49344300 |
| C | 0.15463600  | 1.46957600  | -3.48342700 |
| H | -0.64272100 | 0.72383700  | -3.45377500 |
| H | -0.29033800 | 2.43897500  | -3.23708600 |
| H | 0.52288700  | 1.52320200  | -4.51378500 |
| C | 2.47838000  | -1.16801400 | 2.58593400  |
| C | 1.90182600  | -0.89335100 | 3.83844900  |
| C | 3.73355000  | -0.59913400 | 2.33711300  |
| C | 2.51419800  | -0.06211000 | 4.75852200  |
| H | 0.94681000  | -1.33652800 | 4.10123100  |
| C | 4.36666400  | 0.23718500  | 3.25102700  |
| H | 4.21859100  | -0.77703600 | 1.38299200  |
| C | 3.74756300  | 0.52671200  | 4.46764700  |
| H | 2.05492200  | 0.14645800  | 5.71941800  |
| H | 5.33134900  | 0.66308700  | 3.00141500  |
| O | 4.25462400  | 1.35608500  | 5.42202000  |
| C | 5.49482100  | 1.96942000  | 5.14431800  |
| H | 5.72732700  | 2.59147800  | 6.00705200  |
| H | 6.29300900  | 1.22953700  | 5.00909000  |
| H | 5.44295200  | 2.60104200  | 4.24838900  |
| H | 3.37588000  | -2.11869700 | 0.09665900  |
| C | 1.08963500  | 1.76931800  | 2.02836700  |
| C | 0.48941400  | 2.40154200  | 3.28936900  |
| H | 2.04057800  | 1.28235100  | 2.25882100  |
| C | 1.33400900  | 2.73069600  | 0.86272700  |
| H | 1.76517300  | 2.10336100  | 0.07460200  |
| C | 0.04804000  | 3.34811300  | 0.33270700  |
| C | 2.36479100  | 3.78089400  | 1.25263700  |
| H | -0.46640400 | 3.94305900  | 1.09669000  |
| H | 0.25037100  | 4.01820700  | -0.50754700 |
| H | -0.64838200 | 2.57800000  | -0.01300200 |

|   |             |             |             |
|---|-------------|-------------|-------------|
| H | 1.98343200  | 4.46008900  | 2.02404200  |
| H | 3.27814500  | 3.31795400  | 1.64097600  |
| H | 2.64359800  | 4.39776000  | 0.39412600  |
| H | 1.75196700  | -0.28617700 | 0.10469200  |
| H | 2.04818900  | -3.19245500 | -0.17837500 |
| C | 3.42817600  | -3.91055200 | 1.30863300  |
| H | 4.09334000  | -3.52847100 | 2.08863800  |
| H | 2.73596700  | -4.61120400 | 1.78528700  |
| H | 4.03916500  | -4.47477600 | 0.59838500  |
| C | 1.10458200  | -4.07704900 | -2.52977600 |
| H | 1.96438600  | -4.65594800 | -2.15917100 |
| C | 0.67826100  | -4.73107100 | -3.85054700 |
| C | -0.00880700 | -4.28491800 | -1.50654900 |
| H | 0.36372000  | -5.76529500 | -3.68152000 |
| H | -0.16867500 | -4.19849900 | -4.29343300 |
| H | 1.48089400  | -4.74072000 | -4.59024200 |
| H | 0.12407800  | -3.70431800 | -0.59800100 |
| H | -0.99642800 | -4.04326500 | -1.90403100 |
| H | -0.03676300 | -5.34256200 | -1.22832900 |

## Ia

0 2

|    |             |             |             |
|----|-------------|-------------|-------------|
| Fe | 0.63259700  | -0.56705900 | -0.04269800 |
| N  | 0.68755100  | -0.64613200 | 1.91414000  |
| C  | 1.85765100  | -0.88246600 | 2.76341800  |
| C  | -0.26597000 | -0.19603400 | 2.68613500  |
| C  | 1.52024600  | -0.13656200 | 4.04308000  |
| H  | 1.98048500  | -1.96194000 | 2.91283400  |
| H  | 1.75419400  | -0.66835400 | 4.96588700  |
| N  | -1.34883300 | -0.75562600 | 0.06750300  |
| C  | -2.16585100 | -0.34747300 | 1.06854700  |
| C  | -3.29160100 | -1.27016900 | -1.29448900 |
| C  | -3.58848500 | -0.29248200 | 0.89148300  |
| C  | -4.12262100 | -0.76820700 | -0.34132600 |
| H  | -3.69113600 | -1.64928100 | -2.22799500 |
| H  | -5.19668500 | -0.73435600 | -0.49373300 |
| C  | -1.63847000 | 0.03605900  | 2.34349500  |
| C  | -4.40078800 | 0.21743700  | 1.90840000  |
| C  | -3.86123300 | 0.65155300  | 3.11289300  |
| H  | -4.50499300 | 1.05048000  | 3.88874600  |
| C  | -2.49914700 | 0.54421900  | 3.33130300  |
| H  | -2.07203400 | 0.83154700  | 4.28394100  |
| H  | -5.47236500 | 0.26588800  | 1.73640100  |
| O  | 0.08585000  | 0.02327700  | 3.97495400  |
| C  | -1.89008100 | -1.26807800 | -1.09035300 |
| C  | -0.94545900 | -1.74656300 | -2.02383600 |
| C  | 1.37039300  | -1.99401500 | -2.54248800 |
| C  | 2.39027400  | -2.84314100 | -2.10334600 |
| C  | 1.41434500  | -1.50367900 | -3.85233800 |
| C  | 3.40719200  | -3.22260700 | -2.96892500 |
| C  | 2.43782600  | -1.87907200 | -4.71096900 |

|   |             |             |             |
|---|-------------|-------------|-------------|
| C | 3.43404300  | -2.74787900 | -4.27760900 |
| H | 4.18582600  | -3.89316300 | -2.61853200 |
| H | 2.46613200  | -1.47599700 | -5.71872600 |
| H | 4.23431300  | -3.04042800 | -4.94991700 |
| H | 2.36062300  | -3.19381700 | -1.07721500 |
| H | 0.65485600  | -0.80009400 | -4.17992000 |
| H | 2.75852200  | -0.51094100 | 2.28124700  |
| H | 1.97456500  | 0.86113900  | 4.07579200  |
| N | 0.34241700  | -1.62384400 | -1.64544900 |
| C | -1.38624700 | -2.42168300 | -3.28643200 |
| H | -2.30960300 | -2.97985400 | -3.12081600 |
| H | -1.57729000 | -1.71823200 | -4.10442500 |
| H | -0.63154100 | -3.12354400 | -3.64197300 |
| C | 0.34470100  | 1.37124800  | -0.58431100 |
| H | 2.10303000  | -0.93634400 | -0.02955400 |
| C | 1.74330100  | 1.20339300  | -0.57225400 |
| H | -0.21264700 | 1.35366400  | -1.51820400 |
| C | 2.47942700  | 1.79048900  | 0.62198500  |
| H | -0.15910100 | 1.86610100  | 0.24454700  |
| H | 2.51765200  | 2.88293400  | 0.48126000  |
| H | 1.85970100  | 1.64261400  | 1.51563600  |
| C | 3.90335900  | 1.31286100  | 0.91555400  |
| H | 3.95392100  | 0.22344300  | 0.82872500  |
| H | 4.57912300  | 1.69885600  | 0.14067100  |
| C | 4.34716000  | 1.77271700  | 2.26653300  |
| C | 4.94028000  | 1.06244900  | 3.23601700  |
| H | 4.13191400  | 2.82071400  | 2.48651700  |
| C | 5.33528500  | -0.37782100 | 3.11710300  |
| C | 5.26733000  | 1.68599000  | 4.55859200  |
| H | 6.34026800  | 1.62639600  | 4.77589200  |
| H | 4.97212600  | 2.73605200  | 4.60167800  |
| H | 4.76423600  | 1.15917800  | 5.37978300  |
| H | 6.41660400  | -0.49243900 | 3.25524900  |
| H | 4.86827100  | -0.98166800 | 3.90616200  |
| H | 5.07998600  | -0.82359000 | 2.15520200  |
| C | 2.48554100  | 1.12842100  | -1.86329700 |
| C | 3.63998200  | 0.36056200  | -2.03455500 |
| C | 2.04918700  | 1.90393600  | -2.94869500 |
| C | 4.33554700  | 0.38709600  | -3.23599700 |
| H | 3.96377900  | -0.30212400 | -1.24115200 |
| C | 2.74357400  | 1.90441700  | -4.15577200 |
| H | 1.16805800  | 2.52227200  | -2.82450800 |
| C | 3.91306600  | 1.14765900  | -4.32004800 |
| H | 5.22017300  | -0.23374500 | -3.35343300 |
| O | 2.36108700  | 2.62205700  | -5.25538000 |
| C | 1.17737700  | 3.38055700  | -5.15436000 |
| H | 1.25536400  | 4.15819900  | -4.38472800 |
| H | 1.03375400  | 3.85293000  | -6.12514200 |
| H | 0.30842600  | 2.74954500  | -4.92823800 |
| C | 4.63291800  | 1.14850700  | -5.62915000 |
| H | 3.96713400  | 0.86739100  | -6.45137400 |

|   |            |            |             |
|---|------------|------------|-------------|
| H | 5.01697900 | 2.14225800 | -5.88099100 |
| H | 5.47355500 | 0.45176100 | -5.61434500 |

I<sub>b</sub>  
0 2

|    |             |             |             |
|----|-------------|-------------|-------------|
| Fe | 0.55092300  | -0.48667800 | 0.12354100  |
| N  | 0.80516200  | -0.68088700 | 2.04438100  |
| C  | 2.09812300  | -0.71591600 | 2.73187900  |
| C  | -0.12020200 | -0.45932000 | 2.93585000  |
| C  | 1.75966700  | -0.37198700 | 4.18175400  |
| H  | 2.54154600  | -1.70944200 | 2.61552400  |
| H  | 2.06328900  | -1.13147300 | 4.90491600  |
| N  | -1.38990600 | -0.86312400 | 0.36141300  |
| C  | -2.14616600 | -0.65594800 | 1.46643500  |
| C  | -3.38642800 | -1.42869300 | -0.89583000 |
| C  | -3.57838700 | -0.72930600 | 1.40675900  |
| C  | -4.17294100 | -1.10250100 | 0.16675700  |
| H  | -3.83072900 | -1.74711100 | -1.83182900 |
| H  | -5.25511900 | -1.14892800 | 0.09914600  |
| C  | -1.54125200 | -0.37933600 | 2.73504200  |
| C  | -4.34230100 | -0.44824600 | 2.54345900  |
| C  | -3.73903600 | -0.13473400 | 3.75440300  |
| H  | -4.34427200 | 0.07355600  | 4.62958800  |
| C  | -2.35826500 | -0.12195100 | 3.85046700  |
| H  | -1.87886700 | 0.06589900  | 4.80343000  |
| H  | -5.42461500 | -0.49275300 | 2.46239700  |
| O  | 0.31567500  | -0.30200600 | 4.20577700  |
| C  | -1.97887800 | -1.33015500 | -0.79271000 |
| C  | -1.06778700 | -1.69264600 | -1.81228100 |
| C  | 1.23993700  | -1.84112500 | -2.42596800 |
| C  | 2.25491400  | -2.72825400 | -2.05323800 |
| C  | 1.29064300  | -1.24560500 | -3.69071800 |
| C  | 3.28775800  | -3.02291700 | -2.93149400 |
| C  | 2.33607000  | -1.53300600 | -4.56097500 |
| C  | 3.33777100  | -2.42286200 | -4.18756600 |
| H  | 4.06711800  | -3.71515700 | -2.62938400 |
| H  | 2.37293200  | -1.04950300 | -5.53237400 |
| H  | 4.15409500  | -2.64252200 | -4.86744800 |
| H  | 2.21650400  | -3.16388600 | -1.06059400 |
| H  | 0.51689400  | -0.53795900 | -3.97530000 |
| H  | 2.77669000  | 0.00544000  | 2.26818500  |
| H  | 2.14354400  | 0.60028300  | 4.50125200  |
| N  | 0.22698100  | -1.53427400 | -1.49097400 |
| C  | -1.53716300 | -2.28084500 | -3.10613500 |
| H  | -1.77210300 | -1.51659700 | -3.85564100 |
| H  | -0.77667400 | -2.92986900 | -3.54202100 |
| H  | -2.44021600 | -2.87560700 | -2.96004500 |
| C  | 0.12782100  | 1.39064000  | -0.56291800 |
| H  | 2.02315800  | -0.76925400 | 0.01351300  |
| C  | 1.51539500  | 1.47335000  | -0.33548700 |
| C  | 2.44245100  | 1.44587500  | -1.53403300 |

|   |             |             |             |
|---|-------------|-------------|-------------|
| H | -0.22872600 | 1.25592800  | -1.58203300 |
| H | 1.84645200  | 1.16136600  | -2.40714400 |
| H | 2.75538000  | 2.48386000  | -1.72332800 |
| C | 3.70830700  | 0.55480700  | -1.47338200 |
| H | 3.52429100  | -0.34387500 | -2.07177000 |
| C | 4.97963400  | 1.21892900  | -1.92540200 |
| H | 5.74641400  | 1.37153100  | -1.16478100 |
| C | 5.26142300  | 1.64093400  | -3.16436300 |
| C | 6.56465200  | 2.29908900  | -3.49398800 |
| H | 6.41143600  | 3.30594100  | -3.90090300 |
| H | 7.21299200  | 2.38454200  | -2.61981900 |
| H | 7.10844000  | 1.74072200  | -4.26567400 |
| C | 4.31107500  | 1.49641600  | -4.31193600 |
| H | 3.40700700  | 0.94912400  | -4.04399300 |
| H | 4.00981400  | 2.47772500  | -4.69894700 |
| H | 4.78516400  | 0.97051500  | -5.15003600 |
| C | 2.02789300  | 2.10110000  | 0.90384000  |
| C | 1.18001800  | 2.38734600  | 1.99436300  |
| C | 3.37304500  | 2.47286300  | 1.02930100  |
| C | 1.66714900  | 2.98201500  | 3.15031900  |
| C | 3.85109300  | 3.05160200  | 2.20217400  |
| H | 4.06125100  | 2.33278800  | 0.20573400  |
| C | 3.02952700  | 3.30767000  | 3.29011800  |
| H | 4.90168500  | 3.32287400  | 2.27041000  |
| C | 3.52702500  | 3.91887700  | 4.55887400  |
| H | 3.00342200  | 4.85233300  | 4.78654200  |
| H | 3.35317200  | 3.26261000  | 5.41860000  |
| H | 4.59637800  | 4.12944200  | 4.50177400  |
| H | -0.59497700 | 1.85314400  | 0.10366500  |
| H | 3.83750300  | 0.18663600  | -0.45247500 |
| O | 0.89915200  | 3.28299000  | 4.23791300  |
| C | -0.49869700 | 3.10807700  | 4.11983800  |
| H | -0.76713400 | 2.05517400  | 3.98684400  |
| H | -0.92877400 | 3.47000400  | 5.05277500  |
| H | -0.90609000 | 3.68892900  | 3.28370600  |
| H | 0.12885000  | 2.13498600  | 1.93372200  |

## Ic

02

|    |             |             |             |
|----|-------------|-------------|-------------|
| Fe | 0.77783700  | -0.04990400 | -0.12295900 |
| N  | 1.94938600  | 0.08638000  | 1.42870200  |
| C  | 3.41179300  | 0.18551300  | 1.43898700  |
| C  | 1.53379100  | 0.36376800  | 2.63783000  |
| C  | 3.69249400  | 0.96398000  | 2.71295500  |
| H  | 3.83718000  | -0.82495900 | 1.45728600  |
| H  | 4.54003800  | 0.60753800  | 3.29785600  |
| N  | -0.68642700 | -0.63864900 | 1.08677000  |
| C  | -0.84846900 | -0.35406200 | 2.40222300  |
| C  | -2.86067600 | -1.72323000 | 1.06954700  |
| C  | -2.08220900 | -0.63327000 | 3.07850900  |
| C  | -3.09204900 | -1.33058500 | 2.35185400  |

|   |             |             |             |
|---|-------------|-------------|-------------|
| H | -3.61404900 | -2.27651800 | 0.52060200  |
| H | -4.03229400 | -1.55267000 | 2.84774300  |
| C | 0.20697300  | 0.24505800  | 3.16376300  |
| C | -2.26465600 | -0.21873300 | 4.40064800  |
| C | -1.25580800 | 0.43808700  | 5.09475500  |
| H | -1.41943600 | 0.77089500  | 6.11396000  |
| C | -0.03020300 | 0.64811800  | 4.48883600  |
| H | 0.77702700  | 1.12183200  | 5.03347300  |
| H | -3.22312900 | -0.41489200 | 4.87366300  |
| O | 2.49829200  | 0.76966100  | 3.49876500  |
| C | -1.64253100 | -1.38691400 | 0.42862600  |
| C | -1.29336200 | -1.77097600 | -0.88252800 |
| C | 0.38695200  | -1.64703400 | -2.59189600 |
| C | 1.69209100  | -2.12717400 | -2.74759800 |
| C | -0.38295500 | -1.41798700 | -3.73912000 |
| C | 2.20630800  | -2.37849300 | -4.01165500 |
| C | 0.13983200  | -1.65855500 | -5.00327300 |
| C | 1.43554900  | -2.14313300 | -5.14722200 |
| H | 3.21882200  | -2.75676800 | -4.11154000 |
| H | -0.46678500 | -1.45686700 | -5.88058200 |
| H | 1.84276700  | -2.33138600 | -6.13493500 |
| H | 2.28668100  | -2.28816100 | -1.85534300 |
| H | -1.38341800 | -1.01015100 | -3.63430800 |
| H | 3.76868700  | 0.67587700  | 0.53321500  |
| H | 3.80621700  | 2.04010400  | 2.53499100  |
| N | -0.07810200 | -1.34719100 | -1.29221500 |
| C | -2.17686700 | -2.67879600 | -1.68172100 |
| H | -2.70953700 | -3.37169800 | -1.02824200 |
| H | -2.93330000 | -2.14026200 | -2.26397500 |
| H | -1.59565900 | -3.27179300 | -2.38885500 |
| C | -0.08354600 | 1.79936600  | -0.40202300 |
| H | 2.02602100  | -0.11323200 | -0.96214200 |
| C | 1.06540300  | 1.75685500  | -1.22376100 |
| C | 0.89251300  | 1.57686300  | -2.70654200 |
| C | 2.31041300  | 2.51885500  | -0.85592400 |
| H | 3.19511000  | 2.06934700  | -1.31683600 |
| H | -1.03786400 | 1.57884500  | -0.89021500 |
| H | 2.24874400  | 3.55314000  | -1.22358500 |
| H | 1.68921900  | 0.97154400  | -3.15030100 |
| H | -0.05940200 | 1.10201300  | -2.94938300 |
| H | 0.90690800  | 2.55660700  | -3.20520000 |
| H | 2.47941300  | 2.57036800  | 0.22160200  |
| C | -0.20333000 | 2.60075800  | 0.86065000  |
| H | 0.76205000  | 2.67341300  | 1.37521600  |
| H | -0.87061700 | 2.09797700  | 1.56591500  |
| C | -0.73118500 | 4.02490900  | 0.62877600  |
| H | -0.10993800 | 4.53816600  | -0.11253100 |
| H | -1.73386800 | 3.96248700  | 0.18244900  |
| C | -0.77002400 | 4.84370300  | 1.89311100  |
| C | -0.09234500 | 5.99657400  | 1.97454800  |
| C | -1.55391600 | 4.32158600  | 3.03438200  |

|   |             |            |            |
|---|-------------|------------|------------|
| C | -1.20679300 | 4.61457500 | 4.35513900 |
| C | -2.66831300 | 3.49735000 | 2.81329200 |
| C | -1.96517900 | 4.11983300 | 5.41012700 |
| H | -0.32403000 | 5.21121300 | 4.55791600 |
| C | -3.41127100 | 2.99851400 | 3.87650100 |
| C | -3.07588800 | 3.31031600 | 5.20477800 |
| H | -1.67794100 | 4.35399700 | 6.43215500 |
| C | -3.88599100 | 2.75408700 | 6.32918400 |
| H | -4.93014100 | 3.07629400 | 6.26984600 |
| H | -3.90872000 | 1.65961000 | 6.30224600 |
| H | -3.48621600 | 3.06595600 | 7.29583800 |
| H | -0.12263900 | 6.62286600 | 2.85943400 |
| H | 0.49883600  | 6.35888500 | 1.14012000 |
| O | -4.49081800 | 2.17817800 | 3.72965100 |
| C | -4.83993200 | 1.80132100 | 2.41386000 |
| H | -4.01237600 | 1.28902600 | 1.90682800 |
| H | -5.67995900 | 1.11396900 | 2.50723400 |
| H | -5.14752900 | 2.66707400 | 1.81464600 |
| H | -2.95444300 | 3.25692900 | 1.79698900 |
